# Supplementary material
Source: ML conference proceedings conference paper supplement (https://proceedings.neurips.cc/paper_files/paper/2022/hash/7f970edb14104b81e70e3b03e1f5214f-Abstract.html)
Supplement: Supplementary file 1 [file 7f970edb14104b81e70e3b03e1f5214f-Supplemental-Conference.zip]

Archive with 47 entries (47 files):
- Appendix.pdf
- code/.gitignore
- code/data/case1_pack.txt
- code/data/case2_airfoil.txt
- code/data/w1015.dat
- code/README.md
- code/requirements.txt
- code/src/__init__.py
- code/src/case1.py
- code/src/case2.py
- code/src/case3.py
- code/src/case4.py
- code/src/configs/__init__.py
- code/src/configs/case1/__init__.py
- code/src/configs/case1/fbpinn.py
- code/src/configs/case1/hc.py
- code/src/configs/case1/params.py
- code/src/configs/case1/pfnn.py
- code/src/configs/case1/pinn.py
- code/src/configs/case1/xpinn.py
- code/src/configs/case2/__init__.py
- code/src/configs/case2/fbpinn.py
- code/src/configs/case2/hc.py
- code/src/configs/case2/params.py
- code/src/configs/case2/pfnn.py
- code/src/configs/case2/pinn.py
- code/src/configs/case3/hc.py
- code/src/configs/case3/params.py
- code/src/configs/case3/pfnn.py
- code/src/configs/case3/pinn.py
- code/src/FBPINN/fbpinn.py
- code/src/HC/hard_constraint.py
- code/src/HC/hard_constraint_collector.py
- code/src/HC/l_functions.py
- code/src/HC/normal_function.py
- code/src/PFNN/pfnn.py
- code/src/utils/__init__.py
- code/src/utils/nn_wrapper.py
- code/src/utils/no_stdout_context.py
- code/src/utils/pinn_bc.py
- code/src/utils/pinn_callback.py
- code/src/utils/pinn_geometry.py
- code/src/utils/resnet.py
- code/src/utils/torch_interp.py
- code/src/utils/utils.py
- code/src/xPINN/interface_conditions.py
- code/src/xPINN/xPINN.py
