# Supplementary material
Source: ML conference proceedings conference paper supplement (https://proceedings.neurips.cc/paper_files/paper/2022/hash/7f970edb14104b81e70e3b03e1f5214f-Abstract.html)
Supplement: Supplementary file 1 [file 7f970edb14104b81e70e3b03e1f5214f-Supplemental-Conference.zip › code/data/case1_pack.txt]

% 4.000000 3.000000 1.000000 4.000000 -3.000000 1.000000 4.000000 9.000000 1.000000 4.000000 -9.000000 1.000000 -4.000000 3.000000 1.000000 -4.000000 -3.000000 1.000000 -4.000000 9.000000 1.000000 -4.000000 -9.000000 1.000000 0.000000 0.000000 1.000000 0.000000 6.000000 1.000000 0.000000 -6.000000 1.000000 3.200000 0.000000 0.400000 3.200000 6.000000 0.400000 3.200000 -6.000000 0.400000 -3.200000 0.000000 0.400000 -3.200000 6.000000 0.400000 -3.200000 -6.000000 0.400000 
% Version:            COMSOL 5.3.1.201
% X                       Y                        u (K) @ t=0              u (K) @ t=0.1            u (K) @ t=0.2            u (K) @ t=0.3            u (K) @ t=0.4            u (K) @ t=0.5            u (K) @ t=0.6            u (K) @ t=0.7            u (K) @ t=0.8            u (K) @ t=0.9            u (K) @ t=1
-8                        -12                      0.09999999999999999      0.10000000000026872      0.10000000644763891      0.10000124051042757      0.10001468849367927      0.1000799262772769       0.10028173615706802      0.10073149292391322      0.1015558966710115       0.1028561448970567       0.1046796120221839
-7.761194029850879        -12                      0.09999999999999999      0.10000000000089511      0.10000001370273702      0.10000213991389888      0.10002362006922468      0.10012195496447984      0.10041164095788539      0.10103618971566959      0.10214952540659268      0.10386899896806252      0.10624137519950333
-7.84395093997463         -11.837277204282898      0.1                      0.10000000000078058      0.10000001301522332      0.1000021228786911       0.10002381195224941      0.10012451287619686      0.100424907079021        0.10107830239595447      0.10225209834761517      0.10407586149676314      0.10660424564176632
-8                        -11.759999999999998      0.09999999999999999      0.1000000000005765       0.10000001074050387      0.1000018338799169       0.10002086462166286      0.10011022106286487      0.10037921791223903      0.10096788692742849      0.10203073259295477      0.10368834782459906      0.10599314798836296
-7.522388059701623        -12                      0.09999999999999999      0.1000000000046789       0.10000004263346762      0.10000487941454934      0.10004790190003642      0.1002254272870503       0.10070234997056841      0.1016645224069936       0.10328342355962623      0.10567278337098995      0.10885205237195866
-7.636799687320421        -11.78748772960666       0.1                      0.10000000000440132      0.10000003928165005      0.10000460848831627      0.10004605298496505      0.1002205838065028       0.10069972640751634      0.10168346363720196      0.10336671392303809      0.10588641356747786      0.10927952872684618
-8                        -11.52                   0.09999999999999999      0.10000000000184073      0.10000002326442492      0.10000320123822055      0.10003368392040553      0.10016751469956071      0.10054763107846641      0.10134644317089957      0.10273986325929647      0.10485668538221615      0.10774040238998023
-7.821760982701853        -11.638898291807834      0.09999999999999999      0.10000000000238317      0.10000002644289625      0.10000349618886417      0.1000365085481308       0.10018098547704128      0.10059124939152307      0.10145423851070261      0.10296220659353746      0.10525701818704591      0.10838829356601519
-7.283582089552366        -12                      0.10000000000000002      0.10000000002429958      0.10000013609961374      0.10001149595943158      0.10010041076184388      0.10043050154556186      0.10123730903085877      0.10275306371407067      0.10514773021641464      0.10850460025531211      0.1127868184752034
-7.389993670201243        -11.80735208216309       0.09999999999999999      0.10000000002292299      0.10000012563856435      0.1000108003976647       0.10009572341699131      0.10041674237824456      0.10121727782560981      0.10274755454252742      0.1052071482900968       0.10870806298382829      0.11323427856261688
-7.04477611940311         -12                      0.10000000000000005      0.10000000011814618      0.10000041946262188      0.10002638050127055      0.10020546684044133      0.10080525438263292      0.10214562333227573      0.1044962271292938       0.10799332169957437      0.11265558188288423      0.11836194916090857
-7.157647597823437        -11.805717915951856      0.10000000000000005      0.10000000011434405      0.10000039208044709      0.1000249080907432       0.10019638810972052      0.10078025885038729      0.10210965665861103      0.10448055790093504      0.1080676207783322       0.11292400877281751      0.11895027027176884
-6.805970149253854        -12                      0.10000000000000016      0.10000000053751772      0.10000123521457109      0.10005828883650629      0.10040507495742827      0.10145456669105289      0.10360889570322951      0.10714656648981861      0.11212423433793235      0.1184568494743213       0.12591674912669693
-6.922400289213831        -11.804826195476165      0.10000000000000019      0.10000000054748294      0.10000119039508802      0.10005610474373307      0.10039325597001557      0.10142798332541336      0.10358730306085051      0.10718827223388637      0.11233337994484911      0.1189734988859653       0.12689669610758417
-8                        -11.280000000000001      0.09999999999999999      0.10000000000568483      0.10000005103227039      0.1000057037550665       0.10005544407852256      0.10025886785694038      0.10080116813102791      0.10188932464434534      0.1037123560298404       0.10639482055097622      0.10995717710241905
-7.814986833255593        -11.402971898754863      0.09999999999999999      0.10000000000809905      0.10000006093169049      0.10000636804085318      0.10006095548543904      0.10028244475802407      0.10087158785013169      0.10205451534075292      0.10404154232855588      0.10697443996185428      0.11088212146188749
-6.567164179104598        -12                      0.10000000000000063      0.10000000226878152      0.10000344395874954      0.10012331934382612      0.1007654628015273       0.10252469775940158      0.10585687184697463      0.11099737302057268      0.11786781053996333      0.12624089008589715      0.13576998290402315
-6.683727316562719        -11.804758191237282      0.10000000000000063      0.10000000248758324      0.10000347974738628      0.10012253240873202      0.100762842805294        0.10253479731094746      0.10593612218671371      0.11125316797258512      0.11845432214236361      0.12734149360278277      0.13756993669049963
-8                        -11.04                   0.09999999999999999      0.10000000001626018      0.10000010683256426      0.10000985268361755      0.10008897582232439      0.10039174147393637      0.10115220399201741      0.10261132223495335      0.10496101967310706      0.1083088535225309       0.11263970490056342
-7.808132026517098        -11.163805116011428      0.09999999999999999      0.10000000002603147      0.10000013799565731      0.1000115577001615       0.10010168326436066      0.10044096016680537      0.10128607775352465      0.10290261722218778      0.10550654406030135      0.10922338206229261      0.11404489904745226
-6.328358208955342        -12                      0.10000000000000224      0.10000000880432168      0.10000901501294228      0.10024863704385993      0.10138162517278766      0.10419949587828174      0.10914873849632573      0.11634808645367527      0.1255277107967979       0.13628748419861006      0.14816270305045157
-6.445671330176482        -11.805401364309958      0.10000000000000238      0.10000001036124205      0.1000095284553378       0.10025465325679607      0.10141112444423252      0.10430532143133851      0.10944233178188058      0.11699940283855602      0.12674592237868484      0.13829665911497735      0.15117020101997578
-8                        -10.799999999999997      0.09999999999999999      0.10000000004232797      0.1000002099113243       0.10001623079867439      0.10013698794192268      0.10057178710996446      0.1016067942705287       0.1035130054448909       0.10647385274707295      0.11056801287827513      0.11573526509543458
-7.806647498306684        -10.922236848197736      0.09999999999999999      0.10000000007449354      0.10000028963216347      0.10001989396573037      0.10016216614761671      0.10066258259166451      0.10183763767505151      0.10398707635564484      0.10731753437265268      0.11192248250128788      0.11774357505646958
-6.089552238806085        -12                      0.10000000000000679      0.10000003117068722      0.10002199353937229      0.10047563705109312      0.10237500620176936      0.106681368193092        0.11373399935154084      0.12344893317003365      0.1353186328211008       0.1487544305614271       0.16318831035945855
-6.208044318544009        -11.805883964253239      0.1000000000000096       0.10000003949240462      0.10002435405590614      0.10050275683196476      0.10248754301671124      0.10699681643985337      0.11443852963681263      0.12478467225852978      0.1375486858940205       0.1521349153919566       0.16793734642457658
-8                        -10.559999999999999      0.10000000000000002      0.10000000009947847      0.10000038419245909      0.10002533596074568      0.10020108532552506      0.10080005722061729      0.10215969455821104      0.10457407325154744      0.10820689163846482      0.11309828921918728      0.11913738444039447
-7.80665211180415         -10.680875979279328      0.10000000000000005      0.10000000019081094      0.1000005624475353       0.10003232303693255      0.100245862616005        0.10095239815832911      0.10252720790958614      0.10529533660588018      0.10943940462731465      0.11500777332726554      0.12188373697628814
-5.850746268656829        -12                      0.1000000000000224       0.10000009976992479      0.10004965840575693      0.10085948836688012      0.10387765944307398      0.11015097384889122      0.11979046179929977      0.1324261764210403       0.14728682042719726      0.16359841856221666      0.18071580278959462
-5.969446129932574        -11.806218772655397      0.10000000000003141      0.1000001374724171       0.10005797597351507      0.10094215603050992      0.10418004385603741      0.1108904442151974       0.12124674307833051      0.1349158744027246       0.15111707013056896      0.16904073793790061      0.1879822826363067
-8                        -10.32                   0.10000000000000002      0.1000000002096723       0.10000065144942145      0.10003733908781436      0.10028056381276089      0.10107013286647974      0.1027899585630767       0.10574841836319308      0.11008008011379676      0.11578031989680447      0.12268634415505598
-7.806287804494065        -10.440814530392144      0.10000000000000005      0.10000000043801495      0.10000101053871603      0.1000495483129925       0.10035408700574845      0.1013080966707689       0.10333978357201655      0.10678825766298693      0.1117994710474469       0.11836763883403147      0.12631460744104397
-5.611940298507573        -12                      0.10000000000006955      0.10000028592085959      0.10010308040967973      0.10146074500897816      0.10599819210873114      0.11470630284990106      0.12734640384823187      0.1431993035873686       0.16122967173884825      0.18049991152711856      0.2003202744879938
-5.730840446506211        -11.806636541053242      0.10000000000009186      0.10000042964367895      0.10012703208184282      0.10166246581783629      0.10665894188593206      0.11617044589095667      0.12999108585704014      0.147402118314199        0.16732040202403542      0.1887422653890953       0.21090099991420952
-8                        -10.079999999999998      0.10000000000000005      0.1000000003934403       0.10000101848951175      0.1000518070578934       0.10037132649923151      0.10136611965973978      0.10345874912204989      0.1069630351524129       0.11197847635659813      0.11845372281449561      0.12617690581925772
-7.805946670959017        -10.200202142899494      0.10000000000000013      0.10000000089705674      0.10000167555119845      0.10007157813449317      0.100484142685708        0.10171611518104458      0.10423905963423623      0.10839445538985189      0.11428254059115313      0.12183901612896429      0.13082585134936905
-5.373134328358317        -12                      0.10000000000020588      0.10000072685401118      0.1001955845207327       0.10232568920562311      0.10877149437767959      0.1202919449032644       0.13620411806811117      0.15540974167056446      0.1766340358322435       0.1988109080782939       0.22123889263767874
-5.492076499726788        -11.807155335886735      0.1000000000003045       0.10000119369681836      0.10025463115453237      0.10275078206565358      0.11003471362665392      0.12287881759393636      0.14057786453523888      0.16198264456722467      0.18572955335040386      0.21065866773741382      0.23598057252778662
-8                        -9.839999999999996       0.10000000000000016      0.10000000065312731      0.10000146233986489      0.10006751394239559      0.10046546848117847      0.10166268910566127      0.1041110791679844       0.10812274985625518      0.1137607724020457       0.12092966815319305      0.1293747864684
-7.805982937819354        -9.959888602067602       0.10000000000000027      0.10000000161806609      0.10000254279218963      0.10009692565418131      0.10062597113303662      0.1021437015027301       0.10515326616919742      0.10998870027575842      0.11670116243749447      0.12516931866383565      0.13510151600007256
-5.134328358209061        -12                      0.10000000000051064      0.10000162188416233      0.10033750326638989      0.10345651461606829      0.1121040379394959       0.12663898055581396      0.1458887158978306       0.16838452219199276      0.19265473825686308      0.21754544845099164      0.242370931117753
-5.253057036712317        -11.80757039829817       0.10000000000095836      0.10000292395018029      0.10046481822194618      0.10425419873818444      0.11428282170862399      0.13082188445325402      0.1525992402992342       0.17803445454899183      0.20552899643616698      0.23381393355339883      0.262112500911763
-4.895522388059804        -12                      0.10000000000149638      0.10000314014184782      0.10052741228887785      0.10478113067611956      0.11573746926842209      0.13324330077099492      0.15564925508771796      0.18115900681983446      0.20815445913727082      0.23543183747516883      0.26233916872938295
-5.0138311825164505       -11.807597910624024      0.10000000000194358      0.10000624970013657      0.10076983933633869      0.10613250062174397      0.11917717729739881      0.1395107988366963       0.16529303991113065      0.1945526875835204       0.22551422488599346      0.25684650947948956      0.2878111956139549
-4.656716417910548        -12                      0.10000000000374341      0.10000522690491608      0.10074390739521621      0.1061402864505232       0.11925631988588535      0.13940652308478224      0.16453125823044187      0.1925731145529467       0.22181610587160983      0.25103557700358475      0.2796200236269847
-4.774503006271642        -11.80739635427858       0.10000000000807523      0.10001149237078892      0.10115125552317596      0.10821166487884624      0.12424333592215926      0.1481324968684317       0.17753327020080323      0.21015436619558514      0.2441015933197261       0.2780195692845226       0.31122134594562073
-8                        -9.599999999999998       0.1000000000000002       0.10000000095593391      0.10000192250934992      0.10008248235040833      0.10055198370119876      0.10192785361369176      0.10468211225330275      0.10912103533091173      0.11527487081321013      0.12301090844538247      0.13204063494692175
-7.806097738836496        -9.719780630005328       0.10000000000000066      0.10000000256157338      0.10000352572998138      0.10012291289357866      0.10076512145946477      0.10254980105136868      0.10600044493398487      0.11143775241552968      0.11886649038895665      0.1281149784660435       0.13884739385622866
-4.417910447761292        -12                      0.10000000000309335      0.10000744631759521      0.10094499066100582      0.10730898092711555      0.12215492919531042      0.1443469501711627       0.17152097649288853      0.20143690046880244      0.23232101020662507      0.2629448800394102       0.2927333091136621
-4.535323354411532        -11.807456330047733      0.10000000001081231      0.10001796445071072      0.10154653768296629      0.11017618748105325      0.1287896006747803       0.15562466351285711      0.18794104270700976      0.2232138391907765       0.2594792583252879       0.2953816149554606       0.33028480234631624
-8                        -9.36                    0.10000000000000009      0.10000000123288032      0.10000230966241741      0.10009433668397971      0.10061871381374175      0.10212835134120672      0.10510735935415028      0.10985556203914536      0.11637853599797306      0.12451681384866514      0.1339587324144285
-7.806199389780152        -9.479796559655586       0.10000000000000049      0.10000000355555656      0.1000044586845442       0.10014579186589674      0.10088357733903741      0.10288705827342992      0.10669105261939395      0.11260188917629828      0.12058644433983089      0.13043386197206805      0.14177580288231087
-4.179104477612036        -12                      0.10000000000193505      0.10000906877708497      0.1010797649952944       0.10805469348102052      0.12395415226839462      0.14736080661164302      0.17573533103971686      0.20673649380294049      0.2385628996994235       0.26998839673999514      0.3004612616249421
-4.296603822995602        -11.807942213550229      0.10000000000714739      0.1000237758519517       0.10186209119791655      0.1116496609646795       0.13208185833451894      0.1609332178898221       0.1952068817971653       0.2322333639056056       0.2700143410094799       0.30720279447101806      0.34320114124196915
-8                        -9.119999999999997       0.10000000000000007      0.10000000140109111      0.10000253249584608      0.10010091301090474      0.10065514213678006      0.10223649600188033      0.10533465726305306      0.1102454232077724       0.11696129870779147      0.1253090771664069       0.13496574716537696
-7.806334624862161        -9.239939756954973       0.10000000000000027      0.10000000432886304      0.10000513414749441      0.10016154386964489      0.10096330722586207      0.10311032963584373      0.10714263895768435      0.1133558218578559       0.12169217721822982      0.13191627798779734      0.1436403032306545
-3.9402985074627797       -12                      0.10000000000195153      0.10000943844399335      0.10110901611105581      0.10821304453404278      0.12433162888414527      0.14798837596135353      0.17660847045709627      0.20783058973003662      0.23984835102318816      0.2714367054136126       0.302049399033834
-4.058312446481994        -11.808565994200587      0.10000000000429066      0.10002672892387478      0.10201198640233129      0.11232695678478251      0.13356759948956445      0.16330146642282314      0.1984224261991627       0.23620116179669307      0.2746273784407239       0.31236017901012075      0.34882022883458447
-8                        -8.879999999999995       0.10000000000000007      0.10000000140118663      0.10000253251988299      0.10010091370191983      0.10065514745673247      0.10223652529693981      0.10533479728207912      0.11024592052053674      0.11696279840903374      0.1253128468643018       0.13497405656791847
-7.806486637973177        -9.000139574577725       0.10000000000000021      0.10000000462224122      0.10000537935234104      0.10016711851830983      0.10099121337198312      0.10318786477143153      0.10729859205685453      0.11361517543872159      0.12207175042496816      0.13242502061762543      0.14428143341630273
-3.7014925373135235       -12                      0.1000000000021567       0.10000837095349478      0.10102354706758175      0.10774734553208361      0.12321713366079977      0.1461308522753491       0.17401981954213996      0.20458332126608783      0.23603106923538317      0.26713643225144706      0.2973395840418498
-3.820170933734935        -11.808948878722644      0.10000000000729169      0.10002558382354669      0.10195431146576169      0.11206987257775898      0.13300829641473258      0.1624138311843468       0.19721959439364734      0.23471763312948904      0.2729020802093949       0.3104303607926642       0.3467177658037986
-8                        -8.639999999999997       0.10000000000000007      0.10000000123124786      0.10000230927322722      0.1000943353824086       0.10061872190645103      0.1021284309510808       0.10510778845017049      0.10985712496014342      0.11638327161466906      0.12452871360347133      0.1339849174093049
-7.806602369274214        -8.760264742859937       0.10000000000000021      0.10000000432115563      0.10000512735056433      0.1001613995369492       0.1009626230757668       0.10310854429340384      0.10713937418172505      0.1133512130092613       0.1216875337611819       0.13191461626349302      0.14364721947458767
-3.4626865671642673       -12                      0.10000000000081806      0.1000063149781885       0.10084909812280245      0.10676306374869221      0.1208147467891822       0.14207695118922214      0.16832289634554853      0.19739395732906181      0.22754177783409058      0.2575400264539809       0.28679950424718065
-3.5820966509718546       -11.80871549172893       0.10000000000366928      0.10002081830656029      0.10170922863635012      0.11094948779614462      0.13053359585166305      0.15845141934762141      0.19182168299041216      0.2280393978894116       0.26512157226152727      0.3017181104053321       0.33721673023018234
-8                        -8.399999999999999       0.10000000000000007      0.10000000095019433      0.10000192108152144      0.10008247417873677      0.10055198364342648      0.10192797911309441      0.10468288762991418      0.10912392407506749      0.11528363589425766      0.12303286527813607      0.13208874075680194
-7.806608338981789        -8.52028502871503        0.10000000000000021      0.10000000353400575      0.10000444760816922      0.1001455775749097       0.10088257555378426      0.1028844691538604       0.10668646147447315      0.11259592512125462      0.12058216445732116      0.13043789044299192      0.14180018709016615
-4.706971187369093        -9.707242349007704       0.10037470902651353      1.3190411111600773       1.6249199294186105       1.8136438333130667       1.9538650369181452       2.0607276876535257       2.1462254290239096       2.218019002908978        2.280024359965666        2.3346617300567987       2.383182068267097
-4.8312013574521          -9.555971495105442       0.10038248801439202      1.3190705795557138       1.6249397449889256       1.8136608283515365       1.953879783783941        2.0607393637167886       2.1462291627150893       2.2180049141436844       2.279977634706321        2.3345650512620044       2.383020326516587
-4.926825568391715        -9.711612279892995       0.1001646508115387       0.8041062150077419       1.1317322255404318       1.3401347526233582       1.4959732230392504       1.6159891116840617       1.7126040198964783       1.7939542420757635       1.8643217760988617       1.9264045144583817       1.9816072839148606
-3.223880597015011        -12                      0.10000000000051039      0.10000407379266667      0.10063391406872202      0.10546854533680926      0.11754105628918227      0.13642791420475772      0.16026362016510678      0.1871124379299355       0.2153030474913312       0.24362081054097884      0.2714384704896903
-3.3437933091553553       -11.80809728074374       0.10000000000186733      0.10001440307730473      0.1013451697818678       0.10920019287959214      0.12656010682791788      0.15197874359800753      0.18290152661030915      0.2169121183616146       0.2520784567055625       0.28704571198588885      0.32115768708420056
-8                        -8.159999999999997       0.10000000000000005      0.1000000006449102       0.10000146010089024      0.10006749970923699      0.10046546393426391      0.1016628897559128       0.10411235763659003      0.10812751500268043      0.11377513409446943      0.1209653870529356       0.12945246292526297
-7.806537329639473        -8.280278376067638       0.10000000000000019      0.10000000252842585      0.10000351366027756      0.10012270532185442      0.10076417693291916      0.1025474328391311       0.10599662449613555      0.11143412812131652      0.11886864263595286      0.12813430373422974      0.1389041409272177
-4.555652697079789        -9.831414505663663       0.10037870455107221      1.31906654633893         1.6249366063470654       1.8136588926130195       1.9538795587962499       2.0607465136812295       2.1462585256317475       2.218082970552469        2.2801412732895208       2.3348555304928102       2.383472479989111
-4.765148298976009        -9.878056009138398       0.10016233847474287      0.8136088194382344       1.1413752999002804       1.3495917469156427       1.5052473505613604       1.62507271525408         1.721518896598084        1.8027358396275572       1.873009629734433        1.9350371041107481       1.990216625540907
-4.923583649787035        -9.383396976834797       0.10039281803731066      1.3189427132179126       1.6248416881056824       1.813571328474103        1.9537976849462388       2.0606625866496677       2.1461573011010437       2.217936581749321        2.27990863827034         2.334488982867656        2.3829312839405103
-5.042627530585855        -9.512419261936135       0.1001561609064039       0.8208650145188799       1.1487298195797602       1.3567991978679628       1.5123112413498367       1.631981455237553        1.7282707900350156       1.8093231744358855       1.879412235625695        1.9412268514060675       1.9961693016063078
-2.985074626865755        -12                      0.10000000000031532      0.10000226517249243      0.10042680418918477      0.10410187812439552      0.1139052713171617       0.1299484906074159       0.1508155474483839       0.1748674598539787       0.2005549533484807       0.22669843182931626      0.25263393022893815
-3.1051705822193916       -11.807324601585826      0.10000000000102573      0.10000851924821463      0.1009525931792165       0.10716043223793136      0.12172122497871672      0.14388130892845585      0.17153740624597733      0.2025494217775153       0.2350780344413643       0.2677799443615725       0.29994858140723796
-8                        -7.9199999999999955      0.10000000000000002      0.10000000038646643      0.10000101628577407      0.10005179245256644      0.10037133542398745      0.10136646443440338      0.10346082376663056      0.10697064642819938      0.11200112519405586      0.1185094582894645       0.12629685571286853
-7.80641103637804         -8.040245216068497       0.10000000000000009      0.10000000158712863      0.10000253269100738      0.10009676702119795      0.10062528102900443      0.10214212370365972      0.10515152307048896      0.10999007815285645      0.11671491077191053      0.1252134832823508       0.13520741416198426
-4.383042882014632        -9.923730561656331       0.1003590120816139       1.3189955599800935       1.6248887514790966       1.813617059225801        1.9538436521500695       2.0607192533677563       2.146250865827723        2.2181136452239656       2.280234090650974        2.335035308294898        2.3837592734665725
-4.580469390461034        -10.015245847690112      0.10016327437726114      0.801709989115774        1.1293013581276943       1.3377499381257498       1.49363688835928         1.6137140592789017       1.7104114227563187       1.7918797584637234       1.8624138282813332       1.9247156430175452       1.9801794403427382
-4.9806058470961965       -9.195990236085239       0.10043684327822021      1.3191404362492778       1.624981626791105        1.81369367322962         1.9539097704506179       2.0607760281896397       2.1462833333145572       2.218086597855131        2.2800928443614388       2.334716202288571        2.383209827273138
-5.0966345947924365       -9.289712490740095       0.10021225058136407      0.8924747352631949       1.2202739462346839       1.4265809808922105       1.5804980436306326       1.698609538365583        1.7934911931008621       1.873305040783157        1.9422976125844866       2.0031264279378447       2.0571755535958474
-2.7462686567164987       -12                      0.10000000000015773      0.10000109384394558      0.10025987898510273      0.10286005456582441      0.11037970425609418      0.12339625498286368      0.1409843433243813       0.16185801080122908      0.18464075499898072      0.2082223127680455       0.23191476800413746
-2.8662857751333175       -11.80648492103885       0.10000000000070142      0.10000433963696398      0.10060796571843038      0.10516828890225245      0.11670898956790586      0.13517899882582143      0.15901576812531104      0.1864356814755649       0.21574658196327964      0.24564798518197392      0.2753892320817091
-8                        -7.679999999999996       0.10000000000000002      0.10000000020561466      0.10000064989439504      0.10003732981206803      0.10028061087116717      0.10107073524621855      0.10279332664211598      0.10576050990776387      0.11011546812651181      0.11586621679709051      0.1228687245470277
-7.806264115299537        -7.800207103710455       0.10000000000000007      0.1000000008788343       0.10000167024509903      0.1000715189606075       0.10048397871813212      0.10171620018714267      0.10424154498705777      0.10840539995158462      0.1143168447580696       0.12192446360741994      0.1310093080792574
-4.195799625410668        -9.980643924515439       0.10036400717937177      1.3190369051769295       1.6249178321070048       1.8136420225036034       1.9538672108612565       2.060747177151177        2.1462939008530015       2.2181881562907764       2.2803605163399867       2.3352354452122306       2.3840524016904303
-4.364062157577381        -10.114729438468432      0.10015109478516815      0.7938873268697488       1.1213441915264502       1.3299374401293464       1.4859731028642553       1.606218246003514        1.7030914507313029       1.7847463362141565       1.8554839181041467       1.9180086155224452       1.9737093715768845
-5                        -9                       0.10040628205581854      1.3189388950088108       1.6248193681002696       1.8135444537316474       1.953777895958909        2.060671838109434        2.146226786075793        2.2181026686511403       2.2802072264772435       2.3349539545930016       2.3835956494407555
-5.150355856451486        -9.067340348017613       0.10015473344364668      0.8448300649761681       1.1728473097199128       1.3803832616450158       1.5354012889995223       1.6545860454301191       1.7504551135187711       1.8311679341661116       1.9009899361976823       1.9625981291331838       2.0173882062743558
-2.5074626865672425       -12                      0.10000000000005875      0.10000046206315345      0.10014361845885189      0.10185866166718947      0.10730547887350779      0.1173817151097488       0.13163621478327994      0.14916289988397388      0.16880606683377178      0.18956533479615834      0.21075232479844294
-2.627183109039327        -11.806195083987914      0.10000000000024988      0.10000190863751075      0.10034971250694535      0.1034607864349781       0.11208588325113085      0.12676893220407345      0.1465238572238772       0.1699831039044978       0.19566228574010977      0.22234760045011573      0.24926422773581489
-8                        -7.439999999999997       0.09999999999999999      0.10000000009767473      0.10000038332213561      0.10002533452764557      0.10020119705722318      0.10080109408198738      0.10216519120058036      0.10459338675956076      0.10826231643333782      0.11323054250434199      0.1194134856508902
-7.8060866936681705       -7.560160573332213       0.10000000000000005      0.10000000043196704      0.1000010114783181       0.10004965293901442      0.10035488361553645      0.1013114011172513       0.10335054201943135      0.1068174929948309       0.11187124207354672      0.11852454819047352      0.12662592067497944
-8                        -7.199999999999996       0.09999999999999999      0.10000000004164965      0.10000020949645538      0.10001623860171287      0.10013720534562424      0.10057356974926446      0.1016158761154395       0.10354419156805957      0.10656124324588341      0.11077218919058235      0.11615284817486136
-7.80589750985101         -7.320134482585563       0.10000000000000005      0.10000000018953316      0.10000056490454101      0.10003247165534025      0.10024701076838964      0.10095735266156582      0.10254382476225103      0.10534099337027363      0.10955102263859647      0.11524909230376833      0.12235532938400588
-4                        -10                      0.10037298703240442      1.3189474625444335       1.624830323647203        1.8135563671575332       1.9537844134316802       2.0606690694988012       2.1462255706403046       2.218138554784346        2.2803430641523565       2.335267535584693        2.3841544418612557
-4.120567027536265        -10.161045464944932      0.10016067326760526      0.8072112715779539       1.1348545240980208       1.3431890410709555       1.4989697519334657       1.618950543634951        1.715588278170381        1.7970516850896787       1.8676430820760819       1.9300638424013037       1.985698266465777
-4.980643924500201        -8.804200374513018       0.10047180499819895      1.319083984036463        1.6249390277986333       1.8136602894273477       1.9539082743820708       2.060851309253089        2.146497675638184        2.218510818076437        2.2807978487079437       2.3357713193206404       2.3846840323096345
-5.120896872086409        -8.841187415117673       0.10019330888621043      0.8982449713882736       1.2260062614872662       1.4321592247258021       1.5859615113115062       1.7040040500785718       1.7988871476853565       1.8787827542296642       1.947935872051157        2.0090001054950752       2.0633574034940017
-2.2686567164179863       -12                      0.10000000000002152      0.1000001721528934       0.10007236201572596      0.1011294807139853       0.10485621689032515      0.11229221251617318      0.12338849025983466      0.13760834597836         0.15405184190447624      0.17186779801322483      0.19039864439891893
-2.387930989658394        -11.80625733242803       0.10000000000009902      0.10000073187923213      0.10018218002346398      0.10215754427437444      0.10823541114195821      0.11935746526570014      0.135081272606881        0.15447802956009435      0.17632578825894277      0.19954668183013843      0.22337355970843495
-8                        -6.959999999999995       0.09999999999999999      0.10000000001603059      0.10000010668798705      0.1000098740905787       0.10008938393360019      0.10039486536014867      0.10116747950908567      0.1026623141940507       0.10509977062398794      0.10862482355624581      0.11327046760046904
-7.805765172989649        -7.080110501932222       0.09999999999999999      0.10000000007462077      0.1000002923514554       0.10002007172609441      0.10016368244805428      0.10066970010922716      0.10186281120731365      0.10405769391792967      0.10749001051441053      0.11229136106926084      0.11845293892151333
-3.8040097637793355       -9.98060584706913        0.10044915315597054      1.3190148119875362       1.624888399352733        1.813612485261363        1.953838388289955        2.060721086359885        2.1462757585874117       2.2181893910532695       2.2804034702392286       2.3353549426615894       2.3842963654813585
-3.8743917043024445       -10.157263208092676      0.10016394412061112      0.8152768736701507       1.1430150609293046       1.351185299086133        1.5068062348812143       1.6266206605486442       1.7231055324557432       1.8044377273470265       1.8749236617855887       1.9372690704983138       1.992864490898392
-4.923730561670901        -8.616957118020501       0.10047788095303736      1.3191917417852246       1.6250163081446665       1.8137391232126694       1.9540320000628528       2.061085909395158        2.1469140025691638       2.2191781221207956       2.2817812507012576       2.337133834701488        2.3864897471901556
-5.05964509348256         -8.635743327160023       0.10023327666832434      0.9301647753826641       1.2574101323387248       1.4626255808952533       1.6156623770661844       1.7330591925202739       1.8274477155912048       1.9069957614119253       1.975930189933467        2.036888250576834        2.0912441426201647
-2.02985074626873         -12                      0.10000000000000715      0.10000005704271875      0.10003341646761364      0.1006442255850154       0.10305495497519157      0.10828418371764865      0.11657383590660188      0.12770894891821682      0.14105836171581515      0.15594981891565424      0.1717906780779502
-2.149147797913506        -11.806373807853419      0.10000000000003038      0.10000024806427488      0.10008664501404509      0.1012595622354953       0.10530546421159288      0.11333592657943704      0.1253542558141955       0.14084668815550971      0.1588887696468968       0.17858281960806663      0.19920836085185198
-8                        -6.719999999999995       0.09999999999999999      0.10000000000560581      0.10000005105208991      0.10000574912026401      0.10005621212852688      0.10026444556136825      0.10082721635742274      0.1019733802230816       0.10393333193466923      0.1068833651445425       0.11090623853698829
-7.805705290411704        -6.840054476039211       0.09999999999999999      0.10000000002653213      0.1000001411067818       0.10001179807407436      0.1001039290264772       0.1004521484250861       0.1013266360358458       0.10301646148139632      0.10578030277890584      0.10979696191004708      0.11512294785714093
-3.6166030231541417       -9.92358364978244        0.10048520261967075      1.319013695924909        1.6248839758099682       1.8136055588372082       1.9538297509911542       2.060709666039835        2.146261163279786        2.2181750734929313       2.2804032883727756       2.3353962834496578       2.38442240530642
-3.668270636400889        -10.06581056928568       0.10024615474339298      0.9422219000510903       1.269203013014862        1.4740226626085295       1.626679611065366        1.7436493443130243       1.8375695225025346       1.9166302109065605       1.9850956480522626       2.045630579212242        2.0996111861775524
-4.831414505636773        -8.444347302879974       0.10048779772360938      1.3190083885065516       1.624890355925281        1.8136719170416056       1.9541016507615112       2.0613962190955486       2.1475645524036473       2.220257961397275        2.2833717340803585       2.3393140495865086       2.3893416023238
-4.9706762037674705       -8.414178781325951       0.10012979543749646      0.8937778060428926       1.2215955110496708       1.4279144225178853       1.5819811689784682       1.7004498680197278       1.7959255187756156       1.876573415068348        1.9466299120249249       2.008746073365533        2.064308518076519
-1.7910447761194739       -12                      0.10000000000000231      0.10000001694406206      0.10001422717955948      0.10034630444733883      0.10182294256771444      0.10532750632519326      0.1112683131441567       0.11967701290318707      0.13017820019048473      0.14229199908738935      0.15552164577971833
-1.9106498618766572       -11.806507409193296      0.10000000000001023      0.10000007498326806      0.10003783904662557      0.10069141002239466      0.10323847002530813      0.108763678634705        0.11757855478322497      0.12951926936907165      0.1439660521380419       0.16023148578493915      0.1776814319843293
-1.5522388059702177       -12                      0.10000000000000071      0.10000000455292087      0.10000562221771235      0.10017621614310401      0.10103452354942903      0.10327437713979011      0.10735894993838589      0.11347998624131185      0.12148130000755734      0.13106982774468756      0.1418668166814491
-1.6718385674007605       -11.806456959832532      0.10000000000000304      0.10000002037508567      0.10001525457583638      0.10035811844165754      0.10187613720545287      0.10549727282906994      0.1116963356317855       0.12056715730462582      0.13177194149578877      0.14484329360425455      0.1592669617224928
-1.3134328358209615       -12                      0.1000000000000002       0.10000000111769218      0.10000207758163464      0.10008526402363038      0.10055997100207036      0.10192698266798857      0.10462345115374394      0.10892035285612606      0.11482903544483804      0.12222070976626605      0.13084417685240174
-1.4329791677897592       -11.806334393180945      0.10000000000000094      0.10000000503368796      0.10000572111919588      0.10017589604103296      0.101034726582193        0.10329786962465341      0.10747999878290111      0.11383226395910946      0.12225066109418163      0.1324752465941689       0.14413291514209384
-1.0746268656717053       -12                      0.10000000000000005      0.10000000025313703      0.10000072365736483      0.10003941083183814      0.10029005675537349      0.10108860667056245      0.10280150645655349      0.10571645052433543      0.10995677698989396      0.11552442788262766      0.12229180720834136
-1.194122680718258        -11.806213275969453      0.10000000000000027      0.10000000114302303      0.10000201196168852      0.10008231485536857      0.10054496588507121      0.10189608752493064      0.10460629684764977      0.10899534816815613      0.11513101291312787      0.1229301536155075       0.13216650697642207
-8                        -6.479999999999996       0.09999999999999999      0.10000000000179976      0.10000002345075183      0.1000032944806325       0.1000351499856494       0.10017760181761108      0.10059233787721045      0.10148520432357544      0.10309096264079097      0.10560806891139561      0.10915785828141052
-7.805690298426967        -6.600007473983183       0.09999999999999999      0.10000000000859231      0.1000000643000462       0.10000669782142525      0.1000643425973617       0.10030025427798599      0.10093732881166827      0.10223843890236463      0.10447598709630136      0.10786479640783951      0.112515789091046
-8                        -6.239999999999995       0.09999999999999999      0.10000000000056335      0.10000001132176799      0.10000202847352078      0.10002369172403776      0.10012852042545749      0.10045577878322835      0.1011956070911449       0.102584023335699        0.10483255772217388      0.10808695812039619
-7.8056949903010535       -6.359990428049758       0.09999999999999999      0.10000000000258717      0.10000002883934202      0.10000385966336754      0.10004083716336219      0.1002058009336394       0.1006869099462749       0.10172571922977162      0.10360151526934973      0.10655315172938494      0.11073059003081527
-3.4440285049243666       -9.831201357472041       0.10058135486813384      1.3190633541530874       1.624926448460206        1.8136489564851426       1.9538729299246513       2.0607563934020363       2.1463205173769775       2.2182665404552715       2.280562940063616        2.3356779884894316       2.3848965282988845
-3.445335329069886        -10.00357033109725       0.10014951788824096      0.8597508018541734       1.187713253468633        1.3948721472018326       1.5495485525754276       1.6684055612472861       1.7640060691369321       1.8445542723022192       1.9143683960436368       1.976169890488803        2.0313770050744355
-4.707242348966408        -8.293028812589595       0.10043149157703073      1.3188683278923818       1.6247903553683327       1.8136809188605805       1.9543776160542665       2.0620990102499963       2.1488212626944754       2.222169687884299        2.2860303473027046       2.3428112202382745       2.3937731873430756
-4.888724219065489        -8.23650632328798        0.10008943669122237      0.7965875134768802       1.1240774534130409       1.3327202970522867       1.4890723400076007       1.6099740803293332       1.7078318949477693       1.7907555508725586       1.8630033819123744       1.9272641654331382       1.9849522222344516
-0.8358208955224491       -12                      0.10000000000000002      0.10000000005335723      0.10000023962489468      0.10001749217658458      0.10014445254507585      0.10059312119873876      0.10164611989584671      0.10356935559362275      0.10654925327879554      0.11068156315434809      0.11594677411300396
-0.9552791090012215       -11.806123680124841      0.10000000000000007      0.10000000024086624      0.10000066905012828      0.1000368829569571       0.10027513723039365      0.10104818928965058      0.10274116439977092      0.10567820705568554      0.11003652048701527      0.11586905995302922      0.12308668743368782
-8                        -5.999999999999994       0.09999999999999999      0.10000000000028382      0.1000000079588864       0.10000164144938666      0.1000200797287396       0.10011271249592883      0.10041109930948687      0.10109980906849196      0.10241502307356232      0.10457257646967903      0.10772657232291478
-7.805709284641615        -6.1199929979388825      0.09999999999999999      0.10000000000086946      0.10000001537458013      0.10000261338030021      0.10003002045065623      0.10016090035189638      0.10056505263042965      0.10147210418227304      0.10316396842493321      0.10589145123685338      0.10982490015138176
-8                        -5.7599999999999945      0.09999999999999999      0.10000000000055335      0.10000001129941005      0.10000202785963584      0.10002368907571575      0.10012851514541532      0.10045577240360322      0.10119560247567992      0.1025840235329099       0.10483256687029223      0.10808698536183266
-7.805731407945249        -5.880004882272872       0.09999999999999999      0.10000000000085674      0.10000001535098431      0.10000261270400852      0.10003001679793755      0.10016088898899866      0.1005650249598385       0.10147204652683257      0.10316386184647665      0.10589127387729713      0.10982463231430818
-3.2927576510593206       -9.706971187436142       0.10040915074177319      1.3190519145100104       1.624925155023312        1.8136436847018353       1.9538709676060388       2.0607723822878685       2.146390101303145        2.218448631914515        2.280939965149223        2.3363504243670628       2.3859737895230904
-3.3410061848732835       -9.907676579273536       0.10018126644599172      0.9268937812601161       1.2542133846261256       1.4595165291354433       1.6125781664519636       1.7299147050883765       1.8241676580314554       1.9035496083817882       1.9723624217184006       2.0333107261140086       2.0878067305992505
-4.555971495099763        -8.168798642544099       0.10035231599469185      1.31902883818009         1.6249554553490133       1.8140368424693973       1.9551935500703237       2.063577229814457        2.1510986189163988       2.2253462945235167       2.290201919158295        2.3480778487682663       2.40023793750748
-4.7497566593012435       -8.10192964560162        0.1001257085674939       0.8009361194663639       1.1284499046428353       1.3371466566299033       1.4937679602336529       1.615123415522074        1.7135760263317679       1.7972045438812343       1.8702587849549965       1.935427950592066        1.9941291669784065
-0.5970149253731929       -12                      0.09999999999999999      0.10000000001054836      0.10000007622573441      0.10000752716752447      0.10006995470026557      0.10031584259938238      0.10095277696659304      0.10220948329068001      0.10430000546927594      0.1073802823092449       0.1115154921754168
-0.7164484859985983       -11.806069877538414      0.10000000000000005      0.10000000004748567      0.10000021232616992      0.10001592690031118      0.10013406457618668      0.10056137746589229      0.1015906882545865       0.10351501044685628      0.10656951481902821      0.1109013309025418       0.11653642331435733
-0.3582089552239367       -12                      0.09999999999999999      0.1000000000019791       0.1000000239646257       0.10000326361542233      0.10003442630755315      0.1001723932826654       0.10057068441948891      0.1014235672235622       0.1029525795633277       0.10534735152743652      0.10873036145720788
-0.47762755970755366      -11.80604316334837       0.09999999999999999      0.10000000000882649      0.10000006525094851      0.10000674733598706      0.10006442343764861      0.1002986278646713       0.1009256364753326       0.10219753630489847      0.10437289866488904      0.10765667281004161      0.11216012146355388
-8                        -5.519999999999995       0.09999999999999999      0.10000000000177622      0.10000002340511575      0.10000329335607516      0.10003514532656647      0.10017759279605871      0.10059232730797645      0.101485197369014        0.10309096549844694      0.10560809138021092      0.10915792283936442
-7.805752154588693        -5.640018280709661       0.09999999999999999      0.10000000000253695      0.10000002876052026      0.10000385744094549      0.10004082488814592      0.10020576205543254      0.10068681593233954      0.10172552780221418      0.10360117242267029      0.10655259930743761      0.11072978097688847
-8                        -5.279999999999994       0.09999999999999999      0.10000000000556504      0.10000005099139968      0.10000574778124448      0.10005620682327887      0.10026443566587324      0.10082720543910302      0.10197337494191938      0.1039333423641416       0.1068834105000242       0.11090636410511728
-7.805759127089857        -5.40002135470933        0.09999999999999999      0.10000000000847593      0.10000006415163838      0.1000066937083725       0.10006431927558523      0.10030017920742605      0.10093714972623892      0.10223808563478053      0.10447538109622945      0.10786386463567753      0.1125144897120275
-0.1194029850746805       -12                      0.09999999999999999      0.10000000000040953      0.10000000907735833      0.10000171632736128      0.10002041643118713      0.10011229427568902      0.10040303161823848      0.10106687943346127      0.10232554364017975      0.10438322238699749      0.10739107445847883
-0.23881290495346363      -11.806031922884044      0.09999999999999999      0.10000000000159638      0.10000002083877184      0.10000305767758388      0.1000334015151146       0.1001724360109258       0.10058742734774469      0.1014985964300058       0.10317034717824126      0.10583751070841459      0.10966319945117663
-3.1685854943918583       -9.555652697162866       0.10038380315995686      1.319057245942526        1.6249358555489486       1.8136583352485915       1.953901988410016        2.0608615582754166       2.1466208053135145       2.218944436658255        2.2818516701430367       2.337840160723122        2.3881943725229546
-3.1343814409419353       -9.774272403874685       0.10015501679509674      0.8217870091192104       1.1496529592023264       1.3577026917736068       1.5132077900561305       1.6329169252186537       1.7293609954937386       1.8107739085285208       1.8815323223549265       1.9444103896830753       2.0008570965910883
-4.383396976846261        -8.076416350217725       0.10035828610789455      1.3190497862927997       1.6250504732348188       1.814525347229514        1.9564116829200122       2.065718629757693        2.1542796654163614       2.229654831067525        2.295733696843036        2.3549379605566183       2.408527787407642
-4.532402947815223        -7.949149964832918       0.10014112216564229      0.7809600125646462       1.1082569266097748       1.3177751908063495       1.4756483063962327       1.5985534561574968       1.698702742520542        1.7841154026926722       1.8590492768785458       1.92621141417617         1.98702363665134
-8                        -5.039999999999993       0.09999999999999999      0.10000000001601173      0.10000010664977381      0.10000987313822317      0.10008938005087901      0.10039485820656545      0.10116747268492521      0.1026623154553729       0.10509979625388222      0.10862490960981723      0.11327069928246182
-7.805751725301229        -5.160006758994043       0.09999999999999999      0.10000000002634878      0.1000001409056782       0.10001179237582557      0.10010389586811556      0.10045204091228031      0.10132638433677886      0.10301598142229061      0.10577951650803441      0.10979581893409927      0.11512146261232291
0.11940298507457525       -12                      0.09999999999999999      0.10000000000041016      0.1000000090807912       0.10000171640997917      0.10002041678319558      0.1001122950459316       0.10040303284628697      0.10106688111919175      0.10232554580087665      0.10438322503508696      0.10739107756034377
-2.382729670088087E-6     -11.806028757720602      0.09999999999999999      0.10000000000052388      0.10000001119835313      0.1000020849184531       0.10002468514668865      0.10013533901339987      0.10048459486502932      0.10128086654012482      0.10278903450665522      0.10525297811447949      0.10885313730529543
-3.0762694383421985       -9.383042882011091       0.10044085955464106      1.3191201776258916       1.6249695177924761       1.813692003730376        1.95397104738568         2.0610607443982363       2.147110250258904        2.2199371113050423       2.283579622147684        2.340527624936905        2.392028273091146
-2.993977448215812        -9.575758589818237       0.10016685546293423      0.8275673179661217       1.1554493020168435       1.3633703986992272       1.5187773250198975       1.6384547793786715       1.7350042776578          1.8167175649712133       1.8880026558065166       1.951640675029614        2.0090588699011227
-4.195990236163469        -8.019394152919437       0.10039136034042555      1.319057954298844        1.625203149141889        1.8152528649219806       1.958054156652558        2.0684267347975998       2.158151860116194        2.234784959297863        2.3022323837735987       2.3629213687527626       2.418093261064145
-4.296544276268084        -7.875847605055277       0.10014582607860534      0.8186961468550894       1.1468433575523227       1.3563850308683494       1.5146951470641954       1.6381654444606986       1.7390315512623353       1.825328407985552        1.9013272880555976       1.9697331423097617       2.0319432651319196
-3.3532171527995507       -6.369492224665145       0.10017084691681648      0.296662233104949        0.3441785143786023       0.3883598392092031       0.4399400034440942       0.4963196271887123       0.5555552444430846       0.6158406129683891       0.6757803700933006       0.7344361583784993       0.791405078808883
-3.422261078840904        -6.332565802259458       0.10025298226413769      0.29665467669076445      0.3436467183041878       0.38632832145182566      0.43585017732553205      0.49004259170333664      0.5471504834450174       0.6054730715376672       0.6636409629829692       0.7207123108598901       0.7762601418957705
-3.438011153832868        -6.384068125760291       0.10007569408257119      0.2631387440003462       0.31236010337312375      0.35768289208759624      0.4102919639811085       0.46774827743979974      0.5281679910323615       0.5897614073600992       0.6511111157950137       0.7112493554670365       0.7697436574749534
-3.4827884749592624       -6.282896939591461       0.100172235129778        0.2966246741213103       0.3428349837852557       0.3833308976594113       0.4300580630701384       0.48152125639151744      0.5361615461875845       0.5923468223312421       0.6486780760745624       0.7041648979521771       0.7583304024035062
-3.4863266508541617       -6.361722323391926       0.10006466596445536      0.2575983889669408       0.30665003981708766      0.3511099102592537       0.4025607183479177       0.4588920809595632       0.5183191188162216       0.5790891750769062       0.6397711333465524       0.6993726044997332       0.757434091547366
-8                        -4.799999999999994       0.09999999999999999      0.10000000004182734      0.10000020957340357      0.1000162389888946       0.10013720542209814      0.10057356903123225      0.10161587774188245      0.10354420522965524      0.10656129668938273      0.11077234860235939      0.11615326735615611
-7.8057404062700355       -4.919975492330281       0.09999999999999999      0.10000000007460215      0.10000029226645168      0.10002006867038993      0.10016366421691462      0.1006696420933199       0.10186268163231538      0.10405746340801074      0.10748967574994119      0.11229097067014902      0.11845264521156147
0.3582089552238301        -12                      0.09999999999999999      0.10000000000198961      0.10000002398077694      0.10000326392704904      0.10003442753047938      0.10017239585732984      0.10057068849167665      0.10142357283256641      0.10295258674194803      0.1053473602427449       0.10873037153211347
0.23880789603633235       -11.806032742876733      0.09999999999999999      0.10000000000160393      0.10000002085004212      0.10000305786250928      0.10003340199692247      0.10017243605366766      0.10058742510511849      0.10149858933729687      0.1031703325966274       0.10583748624981527      0.10966316327112431
0.597014925373085         -12                      0.09999999999999999      0.10000000001060794      0.10000007627354979      0.10000752785921034      0.10006995712674578      0.1003158475053334       0.1009527847587353       0.10220949419063707      0.10430001945546093      0.10738029908241291      0.1115155112068899
0.47762694393798916       -11.806047722964886      0.09999999999999999      0.10000000000888414      0.1000000652962131       0.10000674793383928      0.10006442513462029      0.1002986297998456       0.10092563617533368      0.10219753008591971      0.10437288201794272      0.10765664064084492      0.11216006843223135
-3.019356075511057        -9.195799625543371       0.10040420653812664      1.3188642467526677       1.624778532076778        1.8135371309897954       1.953922469281907        2.0612823927897406       2.1478564895684573       2.221515519616793        2.2862913993432423       2.344634455675202        2.3977237200835755
-2.9277349123367626       -9.348937167961648       0.10021244431405292      0.910576872643645        1.2381447004522832       1.4439468600133403       1.5975176407249676       1.7155596228973633       1.8108802099838148       1.8918473340181934       1.9628477153669484       2.0266024870237396       2.084458008564764
-4                        -8                       0.10054791628043584      1.319022442729782        1.6253473205236635       1.816020498358809        1.9597038428948104       2.0710798033460116       2.161926936784845        2.239821929195711        2.308681627350034        2.3709207673299346       2.4277385919212366
-4.042269850635969        -7.8722964139986065      0.10017057197228393      0.9081422715336412       1.2363376145151623       1.4444366874122345       1.6018389863533753       1.724575411758248        1.8250064527964345       1.9112090839589375       1.9874384637949798       2.0563525381475882       2.1192810195023326
-3.2783198501650186       -6.392257569806025       0.10016411185868164      0.2966681951990642       0.3443040353644494       0.3890165104414582       0.4416437086491871       0.49943839412874497      0.5602734830172246       0.6221947675724807       0.6837174142672767       0.7438548063554217       0.8021975166400391
-3.3492576818570035       -6.441744853206119       0.10005958121645109      0.25480149697294646      0.30509724071188876      0.3527646442074335       0.40846931185549834      0.4692604590758532       0.5329998916030768       0.5977419084725741       0.6620137471131544       0.7248351719450344       0.7857950889711746
-3.5324805429865753       -6.222388598033602       0.10016111695203973      0.29660456798626883      0.3419804045172462       0.3800683455982279       0.4237510062224962       0.4723429485719054       0.5244839720012845       0.5785857380095359       0.633185298799753        0.6872167336539144       0.7401391251495786
-3.5671002267580194       -6.2938836940691445      0.10006510935968171      0.2525144704023854       0.3006809507244084       0.34240485710326457      0.39042056338271425      0.44353935198018585      0.5001997578838723       0.5586992815523678       0.6175323305239685       0.6756178044581783       0.732419179347604
-8                        -4.559999999999994       0.09999999999999999      0.10000000009850092      0.10000038366974702      0.10002533735988016      0.10020120330866182      0.10080110231973172      0.10216520431792013      0.10459341922690053      0.10826241732966078      0.11323083067132172      0.11941422987901879
-7.805736603032329        -4.679931902376478       0.09999999999999999      0.100000000190705        0.10000056556033228      0.10003248713676567      0.1002470979961448       0.10095762799699047      0.1025444499590862       0.10534216070224085      0.10955295388344032      0.1152520652975043       0.12235975185531768
0.8358208955223407        -12                      0.10000000000000002      0.10000000005352187      0.10000023971245013      0.1000174931647873       0.10014445582621166      0.10059312813819869      0.10164613170673513      0.10356937296048546      0.10654927595415585      0.1106815901772369       0.11594680432984729
0.7164675479102341        -11.806079407155117      0.10000000000000005      0.10000000004779341      0.10000021248163286      0.10001592914275671      0.1001340745130642       0.10056140555448245      0.10159074900608951      0.10351511930617152      0.10656968266249307      0.1109015617391942       0.11653671308179718
-3                        -9                       0.10054361926778814      1.3190149206877482       1.6248694524232625       1.8136584817796928       1.9542195437415406       2.0620343557074836       2.1494181530320513       2.2242656966500496       2.2905613907722477       2.350680846475492        2.4057123521058954
-2.8528910536702887       -9.105036839162093       0.10013455951897347      0.8460711122233029       1.1740432838360269       1.3815853164759686       1.5368387608862297       1.6567964700333413       1.7543043845820192       1.8377827019243378       1.9116103321677451       1.9784595527000988       2.0395845277347946
-3.8042003744227637       -8.019356075517818       0.10039479197365433      1.31906091623144         1.6255413188416454       1.816589925688388        1.9608131720333928       2.0728725137221455       2.164598408383724        2.2435986393144978       2.3137736098016974       2.3774937001793077       2.4358912719641763
-3.900213722384916        -7.851539194702318       0.1001402239593694       0.8439064119364129       1.1726554072937363       1.382984022094262        1.5425742498903363       1.6675312940471312       1.7701586776755998       1.8585516282875203       1.936989638601714        2.0081355126438205       2.0732913309253473
-3.2                      -6.4                     0.10018718571269403      0.29664234050670435      0.3439780578276668       0.388241628343654        0.4408978314092533       0.49931103130256665      0.5611747998884137       0.6243505776890891       0.6872081299725351       0.7486663166282636       0.808280697777407
-3.2435717263375614       -6.466829485060967       0.10005564491864578      0.2533606022715749       0.3036288108744338       0.3515012607244789       0.40806609536421695      0.47032933028811014      0.5359157951977817       0.6026646361854641       0.6689522687605013       0.7337072364451962       0.7964924926906093
-3.5694334599183084       -6.153358790725495       0.10017467346329885      0.2965948689838744       0.3412655012172197       0.3772172758974318       0.41817520236887334      0.46423367148978945      0.5142131802654161       0.5665539698593427       0.6197213872155417       0.6725707835229138       0.7244986961682077
-3.619949393794926        -6.2080165651954555      0.10006977480261862      0.2533829141558268       0.3005174692231036       0.33930944897609955      0.38365563917611684      0.4333647389239193       0.4871031910032873       0.5432041944433169       0.6000696738655863       0.6565171049195767       0.7119290294296686
-8                        -4.319999999999993       0.10000000000000002      0.10000000020781134      0.10000065066690962      0.10003733570787843      0.10028062368932862      0.10107075188601987      0.10279335123770894      0.1057605674753825       0.11011564608215228      0.11586672347581987      0.12287001673035515
-7.8057575511336745       -4.439877608330333       0.10000000000000005      0.1000000004369387       0.100001014097935        0.10004971257356086      0.10035520557672188      0.10131237355910273      0.1033526601431355       0.10682129565136973      0.11187727346044189      0.11853339587846455      0.12663833781394404
1.0746268656715965        -12                      0.10000000000000007      0.10000000025280174      0.10000072357960098      0.10003941045866478      0.10029005728621616      0.10108861162874334      0.1028015191659906       0.10571647244063165      0.10995680727380425      0.11552446437967429      0.12229184794681501
0.9553326902132477        -11.806130254540959      0.10000000000000007      0.1000000002419507       0.10000066948831109      0.10003689133281113      0.10027518283336433      0.10104833229669587      0.10274148414277508      0.10567878508706859      0.11003741869805446      0.11587031394465262      0.12308830479588813
-3.0193941529379535       -8.804009763743888       0.10039686950846553      1.3190850644536976       1.6249547659954053       1.81382789566613         1.9547162216587848       2.0632191348146094       2.151691155678516        2.2280059928639697       2.296064154236944        2.3581450660210663       2.4152449695850775
-2.868805103414283        -8.96221324114264        0.10017140640484017      0.899051155096967        1.2267828836804089       1.432992990617526        1.5871909371552961       1.706356856957163        1.8034538113504148       1.886910814122762        1.9610371961393998       2.028419475994833        2.0902318513063283
-3.6169571179831452       -8.076269438344589       0.10048858748638294      1.3190553133214868       1.6255054128887423       1.8165006785495643       1.960737274669466        2.0730155123370957       2.165243564784393        2.2450517709381934       2.3162912112254155       2.3812594082884666       2.441006487784025
-3.619515378490778        -7.917235102303579       0.10013177591363832      0.8569509350147834       1.1858470125835867       1.396073968354336        1.555744553715212        1.681057481053185        1.784441554678793        1.874029850740701        1.9540358180164235       2.027019521862543        2.0941648877169574
-3.4443473028843017       -8.168585494360334       0.10035233251206047      1.3189912336902996       1.6252937370324354       1.8158300070181708       1.9595753199416346       2.071575665109032        2.1638371170699564       2.244005568223059        2.3158670419593745       2.381636903996736        2.4422858780130734
-3.4761574533418154       -7.959196393058441       0.10013709279873408      0.8125189632527371       1.1410080466408754       1.3520508008475343       1.512547970164572        1.6389235818821766       1.7435751350092883       1.8346170678614409       1.9162170180657554       1.9908807878024712       2.059733648251786
-3.1216039054803213       -6.392242338821375       0.10019164775882532      0.2966332384798458       0.3433818237189817       0.38649984221198314      0.4384238423391969       0.49681687956535486      0.559210447181074        0.6232696209113064       0.6871884029415353       0.7497633894669248       0.8104954368037077
-3.1673165188065138       -6.473213946636012       0.10003812842228745      0.25030130745246965      0.30026805741190804      0.34758150298475293      0.40405088059441185      0.46684477533435664      0.5334151564451236       0.6014154193144899       0.6690684401049259       0.735199910348288        0.7993307132389263
-3.5922423388383398       -6.0783960944347895      0.10018206419338592      0.2965811178769387       0.34079343101781384      0.3752894165167104       0.41436575369210166      0.4586834496603035       0.507192852728296        0.5583516195765358       0.6105703911120431       0.6626458475789818       0.7139291935093295
-3.64781125596948         -6.116791982997743       0.10006424294441285      0.2566812244434397       0.3030412181287984       0.33967560852379597      0.3812768042039493       0.4284145286456033       0.47993427031469965      0.5341979096753552       0.5895386593372466       0.6446987333016417       0.6990017325222021
-8                        -4.079999999999992       0.10000000000000002      0.1000000003905422       0.10000101750782468      0.1000518009803194       0.10037135295177946      0.1013664865207478       0.10346085921372523      0.10697074068732859      0.11200143170197006      0.11851033305529089      0.12629905509167333
-7.8058285415562105       -4.199818948686812       0.10000000000000005      0.10000000089115006      0.10000167591808255      0.10007163697356893      0.1004845844730604       0.10171795583777254      0.10424524393885064      0.10841186440495705      0.11432687989045336      0.12193893357348844      0.13102934361751592
1.3134328358208514        -12                      0.10000000000000024      0.10000000111027955      0.10000207610091831      0.10008525551648077      0.10055995661195337      0.10192697233197667      0.10462345243242828      0.10892036797101096      0.11482906239911476      0.12222074479449811      0.130844217265378
1.194202067053359         -11.806208100828345      0.10000000000000027      0.10000000114344611      0.10000201262223977      0.10008233633698586      0.10054509073507233      0.10189646976675525      0.10460711533498031      0.1089967687288693       0.11513315120602298      0.12293307043841663      0.13217021457967748
-3.07641635025094         -8.61660302307373        0.10037285167165858      1.3190299454207643       1.624940464797629        1.8140103926174496       1.9554211398175425       2.0648228405930085       2.154540155805902        2.232383517341233        2.302161997969998        2.3660687196532093       2.425031055353576
-2.8797643715634793       -8.70755259686755        0.10015124065600568      0.8308471003786809       1.1588131680444633       1.3669097101405348       1.5231897384916608       1.644934536991108        1.7450408360383334       1.831875112763193        1.90964221798337         1.9808183735843465       2.046470574867694
-3.1687986425702976       -8.44402850486107        0.10037835068951095      1.3190974451627033       1.625048496099143        1.8144555604708725       1.9565726972508968       2.0669657000786015       2.1578663701757432       2.2370070616348925       2.3081352742302985       2.373397808712173        2.4336930395571836
-2.957419801893198        -8.481406841286274       0.10015563599628097      0.8141751917110182       1.1420063640006235       1.3507572811134716       1.5081442315483862       1.6314933139214276       1.7335892662793277       1.8226868251509043       1.9028769209897687       1.9765395170740312       2.0446719716200494
-3.2930288125953746       -8.292757651027816       0.10033954187861165      1.3189692597641152       1.6250866102881323       1.815020854510473        1.9579804888708103       2.069303126798926        2.161106002249657        2.241063855688996        2.3129181468675384       2.378825421557221        2.439700631996018
-3.072513569805177        -8.282826131825178       0.10015540036231223      0.7944885291124982       1.1221332674489164       1.331797298668841        1.4905522077409292       1.6155805795449953       1.7194900097317471       1.8104277914797497       1.8924307096774056       1.9678479987532265       2.0376631481766947
-3.2442495694704796       -8.095561604004166       0.10013892567038683      0.779476288377419        1.1070901606311532       1.317897999294587        1.4781362254300765       1.6046488388813562       1.7098641715110625       1.8018692347813159       1.8847314104961839       1.9608484499835106       2.031249318860072
-3.0466412092067205       -6.369433459890172       0.10016564872282958      0.2966207572062014       0.3427207924796201       0.38447076102292277      0.4353352726250062       0.4933570507927462       0.5559452328114387       0.6205911383318227       0.6853173988609758       0.7487956645108894       0.810464661036895
-3.0860884227654117       -6.449334016163326       0.10004895230784579      0.256309667950491        0.30525549618699527      0.35069678321136616      0.4056097093291849       0.46754984728647436      0.5338398242041399       0.6019542861765322       0.6699440234867052       0.736511551700951        0.8011191972506649
-3.5999999999999996       -6                       0.10025056536249648      0.2965752659226492       0.3406294175472673       0.37460832572858926      0.4130102540818464       0.4567047337596723       0.5046899965533747       0.555429819849012        0.6073145221024093       0.6591191901302156       0.7101786570016518
-3.650867314988268        -6.016843456416694       0.10007686218814997      0.26344912492873274      0.30925571852366995      0.34469842858026617      0.3847833457850242       0.43043642934508586      0.48060086337880026      0.5336647539626361       0.5879405598871413       0.6421438590568208       0.6955759305180823
-8                        -3.8399999999999928      0.10000000000000005      0.1000000006507011       0.10000146167151623      0.10006751004007568      0.10046548441179026      0.1016629160438602       0.10411240864149801      0.10812767213474976      0.11377566021750042      0.120966875146078        0.12945613521824922
-7.805965435020355        -3.959783223130907       0.10000000000000013      0.10000000160800404      0.10000254132680815      0.10009693211427591      0.10062609037136827      0.10214438739726188      0.10515616756420564      0.10999804188191638      0.11672714355792353      0.1252310883249467       0.13523197540379492
1.5522388059701062        -12                      0.10000000000000075      0.10000000450206474      0.10000561514657717      0.10017618261940868      0.1010344688452771       0.10327432523055306      0.10735891470107346      0.11347996989233462      0.12148129875375123      0.13106983622594887      0.14186683192676255
1.4330564167865436        -11.806325608521105      0.10000000000000098      0.10000000500669641      0.10000571939561352      0.10017592330012808      0.10103492142735375      0.10329845982723153      0.1074812110245612       0.11383428032589647      0.12225358964458959      0.13247912772078133      0.144137740986348
1.791044776119362         -12                      0.10000000000000242      0.10000001672277374      0.10001420575241592      0.10034622062428585      0.10182281788989105      0.10532738582568586      0.11126821655453266      0.11967694044674121      0.13017814563582739      0.1422919559413818       0.15552161127585615
1.6719086643700674        -11.806475694501607      0.1000000000000033       0.10000002015839804      0.10001523935219982      0.10035810345186409      0.10187627529194976      0.10549778349722826      0.11169739492308252      0.12056887238883841      0.1317743465166384       0.14484636663982184      0.15927065094065426
-2.9776114019464854       -6.332480542973259       0.10017855603816943      0.2965985965186119       0.3422020215887048       0.38283213316248643      0.4327509927857447       0.4903540884217386       0.5529893476528642       0.6180282650459452       0.6833577334859481       0.7475444470823355       0.809969101228471
-2.975501353095534        -6.411291963138425       0.10005367512595674      0.25344377231503423      0.30159392705948856      0.3452715871593173       0.39885364159285513      0.46040589597538867      0.5270878631956398       0.5961408315624829       0.6653817810309421       0.7333408181111021       0.7993919719827195
-3.592257569780223        -5.921680149705758       0.100177761059614        0.29658140582616543      0.3407935928676061       0.37528915898141185      0.4143647874756942       0.45868175385505766      0.507190536385803        0.5583489059376389       0.6105677516309002       0.662644205701899        0.7139303217513318
-3.659460450706454        -5.961179522570817       0.10006160234339372      0.25766119760912193      0.30371954158273495      0.33946406499263365      0.37991590747412957      0.42598233786297074      0.47658770273273815      0.5301052570148198       0.5848366876138648       0.6394903235430344       0.6933639655074494
-8                        -3.5999999999999925      0.10000000000000007      0.1000000009580315       0.1000019231133737       0.10008248753734905      0.1005520111106321       0.10192801859867133      0.10468297600327835      0.10912420257608603      0.11528454315530835      0.12303536487660206      0.13209476338844153
-7.806136562578227        -3.719827025210007       0.10000000000000021      0.10000000255570203      0.10000352405608114      0.10012288811044219      0.10076503460215029      0.10254975748539337      0.10600129910605861      0.11144206421001489      0.11888088026624742      0.128152245905239        0.13893003534045978
2.0298507462686177        -12                      0.10000000000000771      0.10000005638847835      0.10003337188366701      0.10064408131024982      0.10305476466387146      0.10828400960584245      0.11657369689168257      0.1277088393286517       0.1410582718108241       0.1559497414400043       0.17179061059864378
1.9107791654155626        -11.806645328548798      0.10000000000001015      0.10000007400666396      0.10003778283670793      0.10069122916610392      0.10323823083119045      0.10876347655660455      0.11757841040781948      0.12951912108963695      0.14396577207673508      0.16023090583903898      0.17768037738720935
2.2686567164178726        -12                      0.10000000000002167      0.10000017088565392      0.10007229985777881      0.10112931571157831      0.10485603429143313      0.11229207104424849      0.12338839661470363      0.13760828502333283      0.1540517999422929       0.17186776749425106      0.19039862314705633
2.149658013358964         -11.806824724981619      0.10000000000003463      0.10000024522383387      0.10008652515847345      0.101259278606865        0.10530536019496652      0.11333639401367353      0.12535538670194446      0.1408482351641813       0.15889021906602732      0.17858350780003376      0.19920762210970547
-2.9171030604086754       -6.282788474959398       0.10016086543618308      0.29658387483059817      0.3419625631614844       0.38202502138251404      0.4314134485247436       0.4887681290194125       0.5514458599291912       0.6167692097860457       0.6825440275408278       0.7472666867678693       0.8102723045204673
-2.9017934296101946       -6.377539453449032       0.1000358426318003       0.24653822583972926      0.2945627574721053       0.33777178233893085      0.39113114242362407      0.4529545589887101       0.5203280852676316       0.5903765020891124       0.6607905790650861       0.7300029567731402       0.7973329535671825
-3.5694922246312557       -5.846782847118721       0.10021764884441701      0.2965913249720327       0.34126149962110713      0.3772099679987832       0.4181634103258583       0.4642177010951635       0.5141937907481845       0.5665321611547199       0.6196985672938737       0.6725491916937631       0.7244822477838356
-3.6341887593038926       -5.845703841458272       0.10005563686796783      0.25783634362767716      0.3043818053088783       0.34169314147817165      0.38416958685965646      0.4320989069923647       0.4842660548544892       0.5390282742633686       0.5947498157637808       0.6502053708271638       0.7047439938384805
-8                        -3.3599999999999923      0.10000000000000009      0.10000000124349373      0.10000231230687213      0.10009435588265685      0.1006187673260374       0.1021285043130925       0.10510795679005518      0.10985762641651918      0.11638482031966456      0.12453284003216487      0.133994609584453
-7.806280823399601        -3.4799565031471027      0.10000000000000021      0.10000000356986348      0.10000445902128963      0.10014575324281884      0.10088335620846468      0.10288652076464884      0.10669053576031433      0.11260287024531497      0.12059317080277156      0.13045484633507706      0.14182636173405247
2.5074626865671275        -12                      0.10000000000006193      0.10000046075520368      0.10014356269052689      0.10185852756566786      0.10730534711542998      0.1173816269096381       0.1316361675631863       0.14916287693941033      0.1688060563910855       0.1895653320969191       0.2107523292106349
2.3885055351961273        -11.807022333014437      0.10000000000009014      0.10000072498441183      0.10018175843999642      0.1021552648063697       0.10822971370143263      0.11934727319340256      0.13506568907535846      0.15445620930305856      0.1762969130026781       0.19950999805833772      0.2233284389699732
-2.867434197752456        -6.2222610788587325      0.10016323987355231      0.29659066545813273      0.34201636987938916      0.3821002941726131       0.4314406563135366       0.48878868437404743      0.551567824877855        0.6171165205773388       0.6832142748182943       0.748323874585804        0.8117505067721353
-2.8319641311772106       -6.310619631567078       0.10003633027062342      0.24627150084544966      0.2942053788056937       0.33711896481097653      0.390163055207089        0.4518521604120154       0.5193164270603196       0.5896634994900655       0.6605242999402251       0.7302729361634962       0.7981855365424478
-3.5325658022363324       -5.777738921124493       0.10016432986191826      0.29660422412439597      0.3419785018481712       0.38006239973140454      0.42373980044753207      0.47232677245715426      0.5244636286736936       0.578562418639297        0.6331609789584068       0.6871948400478473       0.7401258172902263
-3.6156864277942753       -5.787889639830759       0.10005935947677243      0.25450184756883926      0.30164008313838503      0.3405205760790251       0.38498271013183866      0.43478498961389794      0.488585423179054        0.5447185617060698       0.6015942089342995       0.6580380457863163       0.7134399910232623
-8                        -3.119999999999992       0.10000000000000019      0.10000000141937031      0.10000253686629955      0.10010094363124554      0.10065521757535893      0.10223664908873802      0.10533509303899752      0.11024678165536451      0.11696536318703872      0.12531949818159496      0.1349893383722274
-7.806378679878552        -3.2400903404107435      0.10000000000000041      0.10000000437392555      0.10000513980025229      0.1001615520635361       0.1009632447620125       0.1031101191821195       0.10714250235587099      0.11335671885082778      0.1216969057301747       0.1319305243022567       0.14367446838220047
2.746268656716383         -12                      0.10000000000016067      0.1000010948163379       0.10025986593543994      0.10285999086538215      0.11037963247571941      0.12339620836931851      0.14098432154207186      0.16185800312000376      0.18464075489762488      0.2082223189118789       0.23191478134120955
2.6272802535083506        -11.807251408609455      0.10000000000025831      0.10000189128908087      0.1003481070543656       0.10345085204751103      0.11205982463795373      0.12672192343908828      0.1464533716358182       0.16988819252576728      0.1955428618910611       0.2222040714286526       0.24909717339975349
-2.830507775349154        -6.153217152834038       0.10017925526763898      0.29659373388368754      0.34223664519076036      0.3827248979532472       0.43234867218618417      0.4898664943656519       0.5527943091770232       0.6185239307842133       0.6848458712867496       0.7502167470940454       0.8139259219452607
-2.7796992169248056       -6.234833546162123       0.10003700436308692      0.2463607038548073       0.29450686927729913      0.3377804456507099       0.3910475466039083       0.4528709537366694       0.520482814890742        0.5910427355935316       0.6621837859809611       0.7322648355040454       0.8005391446213715
-2.807742430210475        -6.078319850247663       0.10022893878628951      0.29662293276407947      0.3424914174724764       0.38342866015701094      0.43339286330289695      0.4911077968355176       0.554167677316202        0.6200181675269303       0.6864722875677534       0.7519927380982715       0.8158629026119893
-2.756356551745595        -6.144390613083054       0.1000374585776912       0.25459014686539677      0.3027199023166179       0.34606954137711987      0.39910761392916344      0.46041691863004935      0.5273830735927955       0.5972718113569933       0.6677664769173296       0.7372458432965144       0.8049590415035732
-3.4828969395908946       -5.717211525040171       0.10016257577306882      0.2966250217089571       0.34283400964664684      0.38332618125540974      0.43004827567144166      0.48150647482331677      0.5361424644048453       0.5923247400699754       0.6486555731807732       0.7041467715350286       0.7583254158062387
-3.5580796462678483       -5.6963042513754765      0.1000630434856843       0.25291942200465783      0.301212529818579        0.3433136748238366       0.39179986610442713      0.44535395929951077      0.5023854263063797       0.5611872685932413       0.6202669175056553       0.6785585384048688       0.7355401226594743
-8                        -2.879999999999992       0.10000000000000016      0.10000000142166494      0.10000253727782871      0.10010094621025811      0.10065522381458492      0.10223665944650344      0.10533510730120059      0.11024679907219109      0.11696538287653545      0.12531951938235267      0.13498936063344977
-7.806456845719025        -3.000163542917553       0.10000000000000053      0.10000000468669312      0.10000538966033574      0.10016718894372913      0.10099141253437834      0.10318829732604816      0.10729954931133666      0.11361739677227285      0.12207714376066324      0.13243739838437166      0.14430782632813313
2.985074626865639         -12                      0.10000000000050198      0.10000227232277696      0.10042687023315515      0.1041019270683599       0.11390529826010164      0.1299485278004902       0.15081559797714145      0.17486751716654778      0.20055501395033862      0.2266984960263084       0.2526339996450296
2.8659985222800497        -11.80745736512476       0.10000000000077987      0.10000431258781352      0.10060504560452017      0.10515160915056372      0.11666772096287432      0.13510762017350467      0.15891215472858897      0.18629988531041972      0.21557965963680803      0.2454514541140194       0.2751646270214516
-2.8000000000000003       -6                       0.10016729180975747      0.2966098793457124       0.342575016363262        0.3837041781570535       0.4338173653510044       0.49161918016968637      0.5547342875625683       0.6206305443290606       0.6871318116578592       0.7527052024848582       0.8166336395145125
-2.751223573607562        -6.074176953785133       0.10006502272725704      0.2613115013960497       0.309303666818116        0.35256376488714253      0.4053200106381568       0.466161215926698        0.5325619518403489       0.6018541022128153       0.6717576266216351       0.7406696087531233       0.8078416012753922
-3.4223885980771804       -5.667519457042571       0.10017697671498874      0.29664895611349484      0.3436403013117785       0.38631894750844825      0.4358363881241382       0.49002434405134243      0.5471284569501732       0.6054487809557888       0.6636177603714475       0.7206966313010266       0.7762637625715956
-3.4807538636354733       -5.630136442546249       0.10006510905448056      0.25586097687246706      0.3050987249875953       0.3499397954702008       0.4018550994490772       0.4586488982080255       0.5185099236589107       0.5796754465736997       0.6407179589982245       0.7006527451658751       0.7590309375023293
-8                        -2.6399999999999917      0.10000000000000016      0.10000000124783674      0.10000231297916494      0.1000943598987991       0.10061877752545105      0.10212852282673728      0.1051079841531225       0.10985766139853642      0.11638486094736768      0.12453288441617177      0.1339946566301336
-7.806527568078304        -2.760190597330921       0.10000000000000046      0.10000000438338423      0.10000513779750016      0.10016148557675723      0.10096290978268045      0.10310921102842485      0.10714071458427461      0.1133537846149837       0.12169262297851703      0.13192474911639263      0.14366709792995333
3.223880597014894         -12                      0.10000000000092844      0.10000408711316915      0.10063403112080671      0.10546864116302886      0.1175411007343664       0.1364279484162653       0.16026365492001163      0.1871124718456906       0.21530307965847229      0.24362084217487612      0.2714385036839864
3.1046979295552113        -11.80752105274683       0.10000000000208353      0.10000852523422986      0.1009511877898688       0.10715242022489456      0.12170202226676059      0.14384899284927968      0.17149162255645553      0.20249078775513232      0.23500753839290142      0.267698679013666        0.2998575358527107
3.4626865671641487        -12                      0.10000000000136322      0.10000632819032274      0.10084920486386673      0.10676311686297907      0.12081471621296175      0.14207689085445072      0.1683228259371046       0.19739387977691494      0.22754169361728063      0.2575399368425791       0.28679941159363465
3.3433580901656392        -11.807389322561322      0.1000000000031035       0.10001450344823966      0.1013488563226579       0.10921579995265208      0.12659332134032183      0.15203135950106658      0.1829738914715797       0.2170038412738652       0.2521889127648968       0.28717418777509507      0.3213034617307438
-2.8077576611624147       -5.921603905561432       0.10017237888858546      0.29661747351124607      0.3424863985449729       0.3834237969450035       0.4333882398695892       0.49110354238316123      0.5541640338649512       0.6200157437768644       0.6864727754708949       0.7519995930928636       0.8158824340160354
-2.735788787268667        -5.971859335776088       0.10006347798488634      0.2554271144056006       0.30379570912003045      0.3476281066747005       0.40101078702887755      0.4624811423047364       0.5295121966338382       0.5994340404626132       0.669962675748568        0.7394908792559725       0.8072669772560035
-3.3533587908108777       -5.630566540117134       0.10024515136833705      0.29666917457773145      0.3441845124315946       0.388364475955268        0.4399422459201044       0.49631874153730654      0.555551228244441        0.6158346630682132       0.6757763389547867       0.7344421005322624       0.7914359594491199
-3.387589925809593        -5.587508119813457       0.10007433988197716      0.26237815126206865      0.3120359271234856       0.35849917566378403      0.4126322839552074       0.4716937009373526       0.5336704109191458       0.5967016979950677       0.6593558536276829       0.7206725612944732       0.7802435272196939
-8                        -2.3999999999999915      0.10000000000000009      0.10000000095912431      0.10000192298788653      0.10008248600778917      0.10055200913536826      0.10192802122412219      0.10468298669454983      0.10912422158831996      0.11528456873973629      0.12303539479381424      0.13209479640843677
-7.806587207539542        -2.520212352662431       0.10000000000000041      0.1000000035734766       0.10000445312883836      0.10014560939933703      0.10088265169215081      0.10288461286982965      0.10668676279999474      0.11259664580158112      0.1205840481866388       0.13044250906866148      0.141810590021773
3.7014925373134044        -12                      0.1000000000026041       0.10000839393803744      0.10102376424429153      0.1077475401319788       0.12321721431414547      0.14613087840814035      0.17401981725982738      0.20458329777877246      0.23603102742683177      0.2671363746699252       0.29733951411481285
3.5819430690873895        -11.807061661161953      0.10000000000487053      0.10002109470690067      0.10172173668692656      0.11100182141968064      0.13064306518075844      0.15862247680405406      0.19205400700271424      0.2283302261947804       0.2654675318396844       0.30211577516466576      0.33766294386252665
-2.9172115250358748       -5.7171030604134         0.10019753717637103      0.2965877187809619       0.34196542181454986      0.38202767028472         0.43141619701460393      0.48877091488611907      0.5514490443395161       0.6167745615379032       0.6825571232895736       0.7472991110666674       0.810345151993625
-2.867519457011435        -5.777611401969371       0.10016350505359387      0.2965975932704819       0.34202157481039186      0.38210482703206883      0.43144489549558857      0.48879271417219         0.551572003211733        0.6171223028909297       0.6832262054315964       0.7483514046574652       0.8118108833454064
-2.841210825729991        -5.699858612122374       0.10005681820045138      0.2538829022628429       0.30153267898056996      0.34399868403952555      0.396444832024243        0.45743227767699773      0.5241405104186748       0.5937149653778738       0.6638133104990603       0.7328296199431711       0.8000548002885081
-2.8305665400804885       -5.846641209277398       0.10016232771436327      0.29660577025791657      0.34224718060742837      0.382735158739728        0.4323587010174767       0.4898761159016955       0.5528036219729171       0.6185338759906353       0.6848596186245648       0.7502409653279278       0.8139728150780385
-2.7476073955065727       -5.878517160128695       0.10007129492854543      0.25353019774791447      0.3017908660663091       0.34537218338882086      0.3986218558727357       0.46010236107838004      0.5272197834998903       0.5972547948448304       0.6678983449155482       0.7375331978934813       0.8054106548137111
-2.781757554644411        -5.785918168095341       0.10006479376158985      0.2527194219222931       0.30066770048264996      0.3436353267284868       0.39645097252823497      0.4577163968055454       0.5247202988899602       0.5946626945712515       0.6652006502305493       0.7347083096142213       0.802447930536494
-3.2783960945673862       -5.607757661188161       0.1001648241042866       0.2966617732628869       0.34429792655839875      0.389010212742544        0.4416368136254725       0.49943068917528605      0.5602653788894522       0.622187928833111        0.683716649211641        0.7438699935003944       0.8022468682449834
-3.3405561073111536       -5.55890806673413        0.10006172596491068      0.2567074654997976       0.3069049185868226       0.3544638535005092       0.410087686732135        0.47082634120293326      0.5345314184700488       0.5992482772730313       0.66350027386946         0.7263081702511286       0.7872683538574212
-8                        -2.1599999999999913      0.10000000000000005      0.10000000064701542      0.10000146040028644      0.10006750029125021      0.10046546337348321      0.10166289175601224      0.10411238850874349      0.10812765906682571      0.11377565349868886      0.12096687263041782      0.12945613577275708
-7.806604301452847        -2.2802562143473963      0.10000000000000019      0.10000000254054608      0.100003513886934        0.10012267982791916      0.10076402730326829      0.10254700840075903      0.10599580327029146      0.11143290463665452      0.11886734317678967      0.1281338166284971       0.13890635611916993
3.94029850746266          -12.000000000000002      0.10000000000512321      0.10000950170796889      0.10110958636050442      0.10821373314178749      0.12433219090508156      0.14798885936799488      0.17660890086084535      0.20783097831828856      0.23984870468984         0.27143702970132366      0.3020496991006651
3.8204614782009156        -11.806623805762294      0.10000000001121545      0.1000261255050046       0.10197537557575913      0.11215418342489532      0.1331808439099393       0.16268005085592577      0.19757801015762055      0.2351633312475486       0.2734294363124247       0.3110338333356976       0.3473923292206819
-3.121680149831412        -5.607742430194687       0.10020546589923132      0.29663594261050136      0.3433831936765744       0.38650102295638494      0.4384250930747407       0.49681798870498867      0.5592118080449521       0.6232732537891128       0.687200513998131        0.7497967833985488       0.8105734465417515
-3.0467828472241405       -5.63050777532503        0.10021448728565648      0.29662445315441993      0.34272390151848825      0.3844749602921563       0.43534065546563705      0.49336285436445215      0.5559513811877772       0.6205993801935332       0.6853339919336486       0.7488338307243039       0.8105485485544138
-3.0530220811542907       -5.575560157001426       0.10009850730489973      0.2646932450036067       0.3128813306163258       0.3570552474052101       0.41071921823220797      0.4716619374822912       0.5371888206478843       0.604724261944133        0.6722612501286473       0.73846155771493         0.8027732526611564
-2.9777389211566128       -5.667434197742202       0.1002226313957794       0.2966023449904837       0.3422052074292015       0.3828365039375415       0.43275671928794424      0.49036057182799114      0.5529965870015696       0.6180379708666359       0.6833759704851521       0.747584032268961        0.8100534442972464
-2.963692667391375        -5.612563001928205       0.10005691647849817      0.2619141046270939       0.3095598892014806       0.3524292816702626       0.40509131487088906      0.4657490814888769       0.5315981356644689       0.5998904719491213       0.6684384692300224       0.7357680599399171       0.8012552202533255
-2.89420152428488         -5.644641145820234       0.10004025081899426      0.253297655476679        0.30101994844672636      0.3437038714198591       0.39641080762852615      0.4575500299740262       0.524254770401217        0.5936740546180074       0.6635060763977956       0.7321874041978945       0.7990426174572524
-3.2                      -5.6                     0.10016939397732619      0.2966452013739894       0.3439803790390106       0.38824453101932166      0.4409013429518552       0.4993150381591044       0.5611797408154093       0.624358301961509        0.6872241970404508       0.7487022249535793       0.808357567932659
-3.235005125858953        -5.531912233726285       0.10006091093002172      0.2530488796600889       0.30329650285921333      0.35113431773619147      0.40771739206469265      0.47006330274821057      0.5357779326244537       0.602681817033785        0.6691392759753824       0.7340745681750239       0.7970566331413189
-3.1373872840148422       -5.550802168045452       0.10007808145370492      0.26211920516208537      0.3111866335045955       0.3570525906743132       0.4120700366905348       0.4736212222027526       0.5391482462008256       0.6062644676382943       0.6731460485893761       0.7385868125262478       0.8020987958084953
-8                        -1.919999999999991       0.10000000000000002      0.1000000003852433       0.10000101568517983      0.10005178627035492      0.10037131880795791      0.10136644210094524      0.10346081487860985      0.10697070191530027      0.11200139898685059      0.11851030449846896      0.12629902963384856
-7.8065599801970045       -2.04028651866228        0.10000000000000009      0.10000000158333411      0.10000252998901549      0.10009671279604541      0.10062502030594529      0.10214141332461335      0.10515011529136671      0.10998779643026606      0.11671180311981812      0.12520997434734896      0.13520459812128774
4.179104477611915         -12                      0.10000000000511522      0.10000914683990676      0.10108048031188144      0.10805561926107336      0.12395497503882731      0.14736155858263597      0.17573603379925976      0.2067371585123495       0.2385635332890381       0.2699890042379476       0.3004618473492326
4.0592316468405105        -11.806303215092003      0.10000000001633529      0.10002740043865806      0.10203348531145719      0.11241013898119702      0.133735750376339        0.16355939248796625      0.19876855326615395      0.23663078452330175      0.2751351787672988       0.3129409366291513       0.3494691945120895
-8                        -1.6799999999999908      0.10000000000000002      0.10000000020380602      0.10000064904175925      0.10003732105106085      0.10028058697478177      0.1010707005557036       0.10279329621418476      0.10576051577029671      0.11011559927770324      0.11586668017372355      0.12286997604031093
-7.806471993920719        -1.8002597827702598      0.10000000000000005      0.10000000087117443      0.10000166681706989      0.10007145833625151      0.1004836905352889       0.10171540328263524      0.10423992245092413      0.10840266693265166      0.11431286541175685      0.12191935374508243      0.13100362920106887
4.4179104477611695        -11.999999999999998      0.10000000000265795      0.10000747865944125      0.10094529872132325      0.10730933509588599      0.12215517882206596      0.14434714345023908      0.17152114573788643      0.20143705984967916      0.23232116482317075      0.26294503117536006      0.29273345837857895
4.298431857387764         -11.806274267409458      0.10000000001147773      0.10002420079235919      0.10187511191573427      0.11169962058157577      0.13218255318094288      0.16108770462201202      0.19541476517708864      0.23249258637679257      0.27032246799121484      0.3075573411238484       0.34359972572552583
-4.706971187388338        -3.7072423489884656      0.10037858741247818      1.3189859930277406       1.6248839706222409       1.8137594972709523       1.9544469520270435       2.0621629044271774       2.148883648042203        2.222235320983952        2.286106014205078        2.3429061728949745       2.3938996769874787
-4.831201357409154        -3.5559714951696537      0.10040494084640701      1.3190816134930223       1.6249428420290806       1.813715639813167        1.954139454262262        2.061432663183833        2.1476050804608007       2.220310507296282        2.2834478475608515       2.339428994883022        2.3895141675499825
-4.892319666917535        -3.6990916260050333      0.10020077609468192      0.8943760657487119       1.2221528500075614       1.4284934808456533       1.582670924436566        1.7013541903508886       1.7971339180899968       1.8781631307871869       1.948674570605195        2.0113214819935874       2.0674964943670617
-4.923583649728353        -3.3833969769761536      0.10036470142528908      1.319085443183516        1.6249567696566167       1.81369324635255         1.9539960531015665       2.06106000458775         2.1469056544435006       2.2192017782960334       2.2818576805307713       2.3372891942481164       2.3867545216570814
-5.0464175267268425       -3.519059815144815       0.10015686256222704      0.8051653680073109       1.132808588570837        1.3412176041131163       1.4971582494123672       1.6174393774272227       1.714519299841241        1.7965463415393244       1.8677967178338768       1.9309644446361884       1.9874617105880616
-8                        -1.4399999999999906      0.09999999999999999      0.10000000009636871      0.10000038258486617      0.10002532603355656      0.10020117229573693      0.10080105562623425      0.10216515097970054      0.10459336621201526      0.10826236689283047      0.11323078217246287      0.11941418283987625
-7.8063488170756115       -1.5602043345852454      0.10000000000000005      0.10000000042597312      0.10000100851027637      0.10004959717966146      0.10035460804728992      0.1013106108279281       0.10334887613019182      0.10681458708453961      0.11186682579243841      0.11851851932014497      0.12661847612394683
4.656716417910426         -12                      0.1000000000012828       0.10000521158842389      0.10074371508895795      0.10613989986486881      0.1192558165873177       0.13940597373023117      0.16453070708614154      0.19257257962419635      0.22181559093065065      0.25103507999769925      0.27961954378503584
4.53765373543553          -11.806431019637373      0.10000000000466493      0.10001803874704869      0.10154999822539394      0.11018940137823481      0.12881524188762128      0.15566319842245058      0.1879930627291256       0.22328015595920805      0.25956071634481087      0.2954789187959976       0.3303983555242824
-4.555652697143739        -3.8314145056209243      0.10038185803896282      1.318926643451165        1.6248718492296401       1.8139720975965894       1.9551393497478537       2.0635322479471347       2.1510617705342123       2.2253181436848406       2.2901852682622965       2.34807830649988         2.4002643463548075
-4.746205139398884        -3.9119240332287095      0.10011684898001043      0.7804175447850574       1.107559653768458        1.3166414275096783       1.4736732350895068       1.59548598039979         1.6943852477538108       1.778432681877853        1.8518838288382782       1.917437915875474        1.9765203368198578
-4.980605847041833        -3.1959902363572468      0.10039436802669013      1.3191087661276542       1.624968792769162        1.8136879218065542       1.9539382958208953       2.060894114352193        2.1465737055416647       2.21865033202604         2.2810395609009317       2.3361605596584214       2.3852709271080466
-5.131069704541019        -3.284112425678908       0.10014909607168686      0.8097084897762251       1.1374387837671425       1.3457442892967142       1.501522665869013        1.6215476152455146       1.7182883096278694       1.7999040666399113       1.87067918556637         1.9333106183379065       1.9892084626165987
-8                        -1.1999999999999904      0.09999999999999999      0.10000000004094478      0.10000020899186701      0.10001623179204765      0.10013718364687522      0.1005735333707913       0.10161583395803257      0.10354415881181611      0.10656125000766635      0.1107723019020364       0.11615322086454773
-7.806185297742388        -1.320157529600138       0.10000000000000005      0.10000000018615578      0.10000056288079005      0.10003242930719393      0.10024679000560825      0.10095669112447218      0.10254237537967965      0.10533837524719843      0.10954690161980342      0.11524323865131479      0.12234771135482363
-8                        -0.9599999999999902      0.09999999999999999      0.10000000001571917      0.10000010639413766      0.10000986930414053      0.10008936704810618      0.10039483458986624      0.10116744084303296      0.10266227865926729      0.10509975655552706      0.10862486812243315      0.1132706571959803
-7.805998060540571        -1.080114231585233       0.10000000000000005      0.10000000007311623      0.10000029126494618      0.10002004752545628      0.10016355279450086      0.10066930027704744      0.10186190694231602      0.10405600876035746      0.10748727644102594      0.11228735990487788      0.11844756921695353
4.895522388059682         -12                      0.1000000000007778       0.10000311514080022      0.10052706828599363      0.104780526831388        0.11573678282904111      0.13324259402429844      0.15564856348087985      0.18115834393269914      0.2081538260682313       0.2354312303567427       0.2623385852268719
4.77657480964388          -11.806673381369464      0.10000000000294611      0.10001142631268778      0.10115090339145595      0.10821014146574069      0.124238342325121        0.148122831678525        0.17751946080782777      0.21013810317441403      0.24408493023318698      0.2780045015796097       0.31120946149944867
-4.383042882125311        -3.9237305616104377      0.10035324144637396      1.3188199993030443       1.6248764131996125       1.8143776732480978       1.9562815127210997       2.0656006133654725       2.154171398941916        2.2295564057725525       2.2956478886430616       2.3548709105072207       2.4084900619055074
-4.59322270734838         -4.047147640203645       0.10007871267574443      0.7217611929548926       1.047078045005703        1.257264299986885        1.4158706675089516       1.5396525799338063       1.6406356840722212       1.7267754329561138       1.802332352915821        1.8700310033483787       1.9313106100072628
-5                        -3                       0.10054399621312053      1.3190219391171079       1.6248742629546726       1.8135994564991698       1.9538413158966075       2.060771936145503        2.146406140455618        2.218417954194992        2.280725196445292        2.3357486215649335       2.3847457882921654
-5.131567824250016        -3.0367640327026457      0.10017306764442353      0.8981300437319517       1.2258708775743006       1.4320221002470623       1.5858232929732092       1.7038721388584306       1.7987782491306272       1.8787254524679802       1.9479699976555274       2.0091741664513907       2.063725493689437
-8                        -0.71999999999999        0.09999999999999999      0.10000000000548852      0.10000005090059338      0.10000574606484007      0.10005620009400155      0.10026442158427203      0.10082718386126588      0.10197334707087484      0.10393330981475389      0.1068833751403096       0.11090632824213593
-7.805838758191931        -0.8400693326778493      0.10000000000000005      0.10000000002597254      0.10000014062076241      0.10001178752089786      0.10010387500194284      0.1004519865918158       0.10132627100081222      0.10301577221812674      0.10577915972787462      0.10979524863186256      0.11512060163486422
5.134328358208936         -12                      0.10000000000030103      0.10000160860533007      0.10033727695536497      0.10345611942603668      0.11210362355499774      0.12663858103523593      0.14588834355131702      0.16838417886233661      0.19265442083643022      0.2175451525462121       0.24237065388697274
5.015277014161442         -11.806917938661533      0.10000000000137776      0.10000620477400336      0.10076957147846267      0.10613168976154931      0.11917436156327753      0.13950497596117686      0.1652844929920304       0.19454265890607933      0.22550433318747817      0.2568383964529695       0.287806204334834
3.6169571180209767        -9.923730561671096       0.10042121519176216      1.319162880898562        1.6249974173756674       1.81370678570627         1.953922154144166        2.0607968740941964       2.146344718293572        2.218255665171693        2.2804812806992856       2.3354719525683336       2.3844958979552398
3.444347302891128         -9.83141450564423        0.1003856858988175       1.3190790008721835       1.6249439452615435       1.813658631957576        1.9538795560238813       2.060759353264028        2.146320641279547        2.2182645107467485       2.2805592105043506       2.335672673197508        2.3848897329369123
3.4145370466574665        -10.000585069111837      0.10014511035245592      0.8270674479879335       1.1549788651534139       1.3629144520767673       1.518304073006801        1.6378682596327234       1.7341155863091704       1.8152418402963006       1.8855789817540651       1.9478644786582897       2.0035272417514336
3.293028812574275         -9.707242348951093       0.1005222776361218       1.3191555185036332       1.6249884571541084       1.8137032307302297       1.9539262229637104       2.0608267804048244       2.1464441983272478       2.2185021123420703       2.28099240619395         2.3364015354625334       2.3860232659943263
3.22450314208424          -9.82953629668471        0.10015102863161271      0.8890016890475124       1.2168003660804803       1.4231966113564032       1.5771994633407411       1.6954228234645328       1.7904873170917468       1.8706256994450314       1.9401752137726826       2.0018720559798195       2.0571462491096746
-0.5556526971656457       -6.831414505606284       0.10040463961594391      1.3189841818305628       1.6248839542692892       1.813815650823692        1.954881384430633        2.063761879686666        2.152879054499373        2.2301662034122347       2.2995752388426016       2.3634242911223877       2.4227257162048366
-0.7069711874054158       -6.707242348971396       0.10042412008837054      1.3191103542727767       1.624999134043344        1.814126184408497        1.9557155744516979       2.0654603861704524       2.1557262621668394       2.2343719006163036       2.3052604993503376       2.370629739424819        2.4314288184343873
-0.7492166903877531       -6.85500136449644        0.10019974405735957      0.8855677764752045       1.213473616631499        1.4203655055094462       1.575851426321035        1.697177340967181        1.7973479150394216       1.8847572372103838       1.9636039582265954       2.036352620094286        2.1040574739867797
-0.3830428820529983       -6.923730561640422       0.10042492997981114      1.319136205139007        1.6249819204911773       1.8137884001751745       1.9544762236735183       2.062637404509617        2.150704746556351        2.2266778032301575       2.2946190148227537       2.3569507708555473       2.414763637943415
-0.5825483620307927       -7.001349019948552       0.10015368503174245      0.829137095878769        1.1570756237237878       1.3651613859864096       1.521363819023815        1.6429993265135032       1.743044224995954        1.8299721723066769       1.908116231038049        1.9800651855994722       2.0469604371893975
-4.195799625676521        -3.980643924462357       0.10035789253125493      1.3188716589564693       1.6250675265708636       1.8151429111442174       1.9579597357633896       2.068343042724107        2.1580767555952005       2.2347195110229032       2.3021818537264895       2.3628965413394205       2.4181120547524704
-4.368851329913462        -4.143324385602109       0.10007979995094697      0.7266181407485195       1.0523001468277633       1.2631265448831568       1.4227877626291205       1.547807663648532        1.6501453778056643       1.7377425294851714       1.8148793003545498       1.8842932632481146       1.947413729780266
-4.980643924514156        -2.804200374582907       0.10040227321417967      1.3189076293507571       1.6248093722946082       1.8135451523899748       1.953807489277733        2.060770735570836        2.146455617547238        2.21853646695675         2.280929254424193        2.3360532913249186       2.385166287788619
-5.148208051065573        -2.897477574300903       0.10013434871766798      0.8438566018522066       1.1718154254824684       1.3793627356469793       1.5344107760559549       1.6536674579596442       1.7496670464130208       1.830585269830417        1.9006991977118515       1.962694207296609        2.017971820840519
-8                        -0.47999999999998977     0.09999999999999999      0.10000000000176083      0.10000002337990462      0.10000329268348152      0.10003514206364204      0.10017758450852406      0.10059231256024097      0.10148517615859483      0.10309093924436903      0.10560806261182408      0.10915789511571507
-7.805741299845365        -0.6000316390819966      0.10000000000000005      0.10000000000840849      0.1000000640966638       0.1000066935678983       0.10006432346356246      0.10030020530938764      0.10093723132191264      0.10223826801767415      0.10447571172732474      0.1078643867218136       0.11251523628430561
-8                        -0.23999999999998956     0.09999999999999999      0.10000000000055165      0.10000001129232317      0.10000202753199493      0.10002368708387514      0.1001285092720513       0.10045576108945241      0.10119558565788282      0.10258400292468299      0.10483254574257812      0.10808696895364478
-7.805695769721301        -0.36001077435187384     0.10000000000000005      0.10000000000253158      0.1000000287564895       0.1000038578374728       0.10004082997776664      0.10020578797200863      0.10068689758834727      0.10172571888084737      0.10360154008136897      0.10655321740917283      0.11073072203587551
5.373134328358191         -12                      0.10000000000012148      0.10000072277630456      0.10019548905373783      0.10232552022178047      0.1087713473591214       0.12029183765211714      0.13620404644710488      0.15540969701630028      0.1766340110912545       0.19881089868234167      0.22123889589598203
5.2538572681177875        -11.806911466511124      0.10000000000050828      0.1000029141028682       0.10046509488842177      0.10425619538510118      0.11428749944872317      0.13082955395720589      0.1526103931596516       0.17804983416353518      0.20554946656526732      0.23384033930051126      0.262145514990368
5.611940298507447         -12                      0.10000000000004076      0.10000028485795238      0.1001030416598007       0.10146067006250044      0.10599814355134322      0.1147062992505138       0.1273464384134944       0.14319936386686286      0.16122974904732978      0.1805000014418162       0.20032037488917442
5.492495471252799         -11.806837469680682      0.10000000000018001      0.10000119092790725      0.10025462211677337      0.10275087166081331      0.11003480213042928      0.12287869991748988      0.14057758127753495      0.1619825011353979       0.18573002004861303      0.21066027428620648      0.2359837874060888
5.850746268656703         -12                      0.10000000000001423      0.10000009937199504      0.10004963540691125      0.10085942859991696      0.10387760343697056      0.11015094618662157      0.11979046214546056      0.13242619580173298      0.14728685219623858      0.16359845974365075      0.18071585265190102
5.731327573982589         -11.806834084958028      0.10000000000006846      0.1000004268726764       0.10012669871161163      0.10165968555818337      0.10665017097665715      0.1161526238679149       0.1299623501575674       0.14736171071564821      0.16726835757030076      0.18867910999446427      0.21082740881542783
3.8042003746326998        -9.980643924524097       0.10037262733563727      1.3189201704203986       1.6248250057099465       1.8135543144853774       1.9537853068406603       2.0606698435964756       2.146225521702685        2.2181400270429643       2.280354934880678        2.335307097716642        2.384249098089848
3.6488463915967144        -10.076870794277204      0.1001986748301031       0.8967880298220315       1.2245260852601703       1.4307088282972107       1.5845224676778658       1.7025536580729799       1.797410180809957        1.8772924434514722       1.94648841697311         2.007685101185162        2.06227162866974
3.1687986424916166        -9.555971495021298       0.10041028615609031      1.3187649572105267       1.6247037514463976       1.8134547159081797       1.9537178699785318       2.060689825189337        2.146457663791463        2.218787692652353        2.2816997799649203       2.3376918925827104       2.3880487123942324
3.091858645456277         -9.711321489612608       0.10008485003792264      0.8418157475644736       1.169803507435543        1.3773992651781517       1.5324863422280617       1.6517861629014354       1.7478848885035219       1.8290397231343365       1.89963144606709         1.9624307860804893       2.018878984516808
-0.8312013574358781       -6.555971495129699       0.10040268247020255      1.3190256441832664       1.62500504018043         1.8144704756457977       1.9567238458964613       2.0673502404197865       2.1586421294408447       2.238409589466353        2.3104821217966256       2.3770650952629464       2.4390725867840177
-0.9171416115741206       -6.6933759000003095      0.10014783226283493      0.8514029263306709       1.1795559011605137       1.3877256405409168       1.5448302874960775       1.6680999657149782       1.7704032143942718       1.8600506965010928       1.9411827713924443       2.016213751085146        2.0861493698873357
-0.19579962555554245      -6.980643924486512       0.10037751638595242      1.3189661380765747       1.6248586941951852       1.8136278974304656       1.9541185032684214       2.061826198384081        2.149174189992695        2.2242049242672977       2.291070923783144        2.3522824593771405       2.408996833130606
-0.3559149302488018       -7.073865202264521       0.10019933958967057      0.9004721431574254       1.2281749262878305       1.4343348152223563       1.588489597434302        1.7076728797893783       1.8049616996913571       1.8889213579866007       1.96400325401232         2.0329044444433797       2.0968518228215896
-4                        -4                       0.10037425150519012      1.3187701569362051       1.6251724547567503       1.815869858730842        1.9595695851194417       2.070954627799835        2.1618100687611617       2.2397181578410925       2.308603504430864        2.3708904418564996       2.4277905082844526
-4.136580146420052        -4.193358886201969       0.10008243718126299      0.72715881895981         1.053170921338692        1.2649298339952109       1.4258681385603371       1.5522851115399807       1.656115464858185        1.745320206143498        1.8242060775269455       1.8955150915539105       1.960646756432315
-4.923730561690612        -2.616957118068035       0.1004153508584134       1.319111838363387        1.6249638690602144       1.813696205033436        1.9539962971835574       2.061059144134871        2.1469040715031524       2.219199421409141        2.2818544577897257       2.3372850540160623       2.3867493987036745
-5.074511116338794        -2.647350011362873       0.10019856583223294      0.9015664815744919       1.2292588353413991       1.4353208793283834       1.5890768401367554       1.7071370838621238       1.8021187991649277       1.882202948245387        1.951638615107289        2.013083176267768        2.0679235515951735
-8                        1.0658141036401503E-14   0.09999999999999999      0.1000000000002828       0.10000000795071518      0.10000164108778209      0.10002007764498015      0.10011270674743027      0.10041108904771805      0.10109979514119587      0.10241500804452218      0.10457256478676424      0.10772657217514899
-7.805687037000998        -0.12000484127110334     0.09999999999999999      0.10000000000085585      0.10000001534574787      0.10000261266115011      0.10003001790417766      0.10016089844367704      0.10056506222518335      0.10147214500707953      0.10316406732764484      0.10589164071706902      0.1098252192293392
6.0895522388059575        -12                      0.10000000000000471      0.10000003098138309      0.10002197668832154      0.10047557480708795      0.10237491593154883      0.10668127700795105      0.11373391602607325      0.12344885643594944      0.1353185606131046       0.14875436231104386      0.16318824714277624
5.97016599445319          -11.806850947972285      0.10000000000001912      0.10000013576478169      0.10005765464641847      0.1009388026135253       0.10416826158160321      0.11086474140190315      0.12120313142940682      0.1348520292361051       0.15103211003923242      0.1689348011546353       0.18785598048514715
4                         -10                      0.1004090677723342       1.3188178461526343       1.624730403103167        1.8134727417399157       1.9537111792525306       2.0606029893519815       2.1461645523257546       2.2180813955815935       2.2802889697519464       2.335215993384039        2.3841050160048494
3.900302292263547         -10.167680641825209      0.10012050741662563      0.795827024675781        1.1232817972052123       1.3318282642097472       1.4878238134467636       1.6080362783107063       1.7048954914275056       1.786564967249231        1.8573545137340284       1.9199753842059188       1.9758207517446527
3.0764163501783726        -9.383396976751461       0.10039984830296296      1.3189595282153777       1.6248550793887144       1.8135997496430767       1.9538931034580858       2.0609917047920647       2.1470468314298827       2.219877311324423        2.2835219436147245       2.340470934372017        2.3919716131543782
2.926872827951798         -9.535224328310026       0.10008448740344952      0.7316428674578239       1.05724082813649         1.2667239019314473       1.423814716061907        1.5454136892943888       1.6438623925430174       1.727383743850828        1.8004097560375603       1.8657538185035027       1.9248536952751658
-0.9235836497363984       -6.383396976956774       0.1005555166487941       1.3191076995639808       1.6251639138938188       1.8150604062215303       1.9579917766929393       2.0693615841668724       2.161395857124592        2.241896076481675        2.314713059463574        2.382064975597238        2.4448557272294957
-1.025370019595668        -6.470628551037727       0.10017443280701935      0.9088810735362223       1.2367226095138353       1.443888888983252        1.60046401869151         1.7233171133912002       1.8253035172066796       1.9147268809398894       1.9957322348144948       2.0707271141759502       2.1406929616335852
0                         -7                       0.10039919614066238      1.3187902940180822       1.6247087721719762       1.8134821989370173       1.9539179718711275       2.0614770388707693       2.1485738333527657       2.2232649337450607       2.2897375624145577       2.350536710359465        2.4068462233081287
-0.11260510189739024      -7.170719833732536       0.10011675578624057      0.785761292822137        1.1129778540749717       1.3217288799202656       1.4781442915215965       1.5993656858946081       1.6982525757039346       1.783380692496504        1.859339782256644        1.9289678814601279       1.993586027154951
2.9777389211408978        -6.332565802247297       0.10019476625836506      0.29660123022924856      0.34220437265405684      0.3828358558209212       0.432756204049165        0.49035998752971627      0.5529951479757597       0.6180333397572593       0.6833616821947763       0.7475470558107734       0.8099702687002491
2.917211525031739         -6.282896939582466       0.10018722728899572      0.29658967140569664      0.3419671985017129       0.38202939642504136      0.43141781509818994      0.4887722682557356       0.5514494427470787       0.6167719083357216       0.6825456026623327       0.7472669943950917       0.8102712757897136
2.889274667922715         -6.360526606165449       0.1000414671838358       0.24934831285394493      0.29721806772014675      0.34012785344255014      0.39313888702802025      0.45463896034185225      0.5217354725555295       0.5915563279805086       0.6617825267354015       0.730835765917168        0.7980266053753214
-3.804009763800232        -3.9806058470733072      0.1004513668624926       1.319102279608395        1.6255750450311932       1.8166283779093038       1.9608525313610523       2.0729152951944934       2.164650293289665        2.2436734921528454       2.3138999699612675       2.3777178582728626       2.4362795428544604
-3.902929739476675        -4.17983213849989        0.10008893768927242      0.767370059005169        1.0950620102717668       1.3070520536224965       1.4683127767476059       1.5950353151717904       1.6993382855755785       1.7892727464366216       1.8691485505198815       1.941670772200956        2.0081748628023903
-4.831414505637979        -2.4443473028817775      0.10038787127277334      1.3189856618194593       1.6248798903820956       1.8136613884720287       1.9540919512086903       2.0613881285474793       2.1475619934691497       2.220268224666379        2.283405970981797        2.339387157943532        2.3894720452322784
-5.006256695168437        -2.413963038097846       0.10015247775400947      0.8140771714993736       1.1418559537870154       1.3501036457224531       1.5059177856919161       1.6261030209939664       1.723137148081767        1.8051693247814578       1.8764697143068167       1.939727392092882        1.996353133874319
-8                        0.24000000000001087      0.09999999999999999      0.10000000000055709      0.10000001130446663      0.10000202791120698      0.10002368895409618      0.10012851384842288      0.10045576868174955      0.10119559571207526      0.10258401460870874      0.10483255832992984      0.10808698210727712
-7.805692934459288        0.11999105040947007      0.09999999999999999      0.10000000000085955      0.10000001535259616      0.10000261280687965      0.10003001825956136      0.10016089780587407      0.10056505690946844      0.10147212890784123      0.10316403284084315      0.10589157971412795      0.10982512420037173
6.328358208955212         -12                      0.10000000000000131      0.10000000871369062      0.1000090016119753       0.10024856315478563      0.10138147255762553      0.1041992851420331       0.10914849030265396      0.11634781555557479      0.1255274267983865       0.13628719347536708      0.1481624107632865
6.209017800238835         -11.80687164784547       0.10000000000000563      0.10000003870696582      0.10002414458890994      0.10050003462817204      0.10247683706370601      0.10697155156834558      0.11439317674735756      0.12471533963604169      0.13745327722314268      0.15201275986806487      0.16778860528581185
6.567164179104468         -12                      0.10000000000000038      0.10000000223221638      0.10000343547868569      0.1001232576280731       0.1007653123093764       0.10252446762413546      0.1058565845850113       0.11099705048312332      0.11786746795799556      0.1262405370610965       0.13576962614742413
6.44809392499054          -11.806780986415728      0.10000000000000166      0.10000000998925451      0.10000936699417616      0.10025185863603144      0.10139856059984102      0.10427282854208504      0.10938015762116833      0.11689975628706507      0.12660398740415893      0.13811027858382433      0.150939058527603
4.195990236116594         -9.98060584708993        0.10044239821922459      1.3190387179136964       1.6249180797111886       1.8136445934121774       1.9538711529619042       2.0607525136628806       2.1463003382026327       2.2181953976830497       2.2803683359424465       2.335243694843087        2.384060950019534
4.0959424466573315        -10.184217431655187      0.10009588724016426      0.757351932220286        1.0838161006853786       1.2929687484141823       1.449622122139027        1.5705833567344283       1.6681620978317822       1.7504813579213887       1.8218507992189248       1.8849879249966757       1.9412869198955716
3.019394152894906         -9.19599023604073        0.10034520845022624      1.3190663600362769       1.62494181034801         1.8136844129929168       1.95405886802175         2.061411749793808        2.147980345487506        2.2216343960687346       2.28640545764488         2.3447438276453942       2.3978285174080307
2.8792339877063373        -9.355533186187685       0.10012420831711759      0.7864603611528792       1.113703758619424        1.3224253822520096       1.4786905129314414       1.5994318580209637       1.6972477214251425       1.7804732754955965       1.853540914616756        1.9192227733439153       1.9788922293377726
3.0467828471837497        -6.369492224658222       0.1001750568716542       0.2966179418087089       0.3427183098554393       0.38446982863347795      0.4353359100408368       0.49335830958460175      0.5559462622561695       0.620591320472167        0.6853163767926699       0.748793278957742        0.8104608558281644
2.9611347457912744        -6.396424486998932       0.10005026644509162      0.25668364733369436      0.30457807624904115      0.3477924956581408       0.4008896050138491       0.4620349697740341       0.5283947040400875       0.5971984775324354       0.6662421332992651       0.7340376328134147       0.7999476083582412
-0.9806058470664435       -6.195990236234112       0.10039523700269078      1.3190288877254053       1.6252276078575256       1.8155179835283155       1.9589831103330597       2.070845522273034        2.163299627923179        2.244165881937846        2.3173390328420678       2.3850679918614386       2.4482607200621156
-1.0980222060616558       -6.349020419625789       0.10013850035750067      0.8454513115909137       1.1737858222150808       1.3830539945432694       1.5417002814008407       1.6665827346167064       1.7704502455426188       1.8616130300207792       1.9442675476197577       2.020861930074471        2.092384423678251
0.19599023591463385       -6.980605847130294       0.10042465844789232      1.318968609066518        1.6248623902066741       1.8136373186523704       1.954130412054954        2.0618402657060075       2.149189773144862        2.2242216224172475       2.29108848547036         2.3523007771750946       2.4090157749870635
0.08774052474765347       -7.184478057230056       0.10008223341198261      0.7581138932799539       1.0846699436171165       1.2938590087702233       1.450743964727185        1.572488820211337        1.6718735222795273       1.7574524935165248       1.833825349946118        1.9038441216662514       1.9688383837529189
2.867519457008607         -6.2223885980264         0.1001632152964776       0.2965986038028712       0.3420223815907343       0.382105562917667        0.4314454860612076       0.4887930523306083       0.5515715568923714       0.6171193929992425       0.6832161118476278       0.74832456601019         0.8117500027184529
2.8406035347597878        -6.3010702250936825      0.10005504740990968      0.25328156111899247      0.30095558685974017      0.3434568640716717       0.3959497721359964       0.45699173864526693      0.5237579281932804       0.5933895149744005       0.6635386144527504       0.7325922377235786       0.7998313657620656
-3.616603023136026        -3.923583649774922       0.1004086172222386       1.3191197456406643       1.625551407899016        1.8165322399160684       1.9607616896440934       2.073039301727225        2.165284213414057        2.245143525752975        2.316495510959093        2.3816675777458736       2.4417402047349435
-3.7240812477800422       -4.114501179905943       0.10012483214432923      0.8556916317549829       1.1846156979435334       1.3949143627121041       1.5546014760478444       1.6798056810121935       1.7829183949199996       1.8720744390246586       1.951537947380319        2.0239351683546265       2.090522028511995
-4.7072423489991255       -2.293028812622324       0.10040854794853614      1.3190839632675704       1.624957968389403        1.813825426328201        1.954506735858966        2.06221868480772         2.1489361034504877       2.2222846423799543       2.286152236144815        2.342949306497059        2.393939664825687
-4.861580288807583        -2.2419115910923786      0.10019915521170371      0.8570499092424454       1.1850546368259995       1.3924094099913278       1.5475437467024675       1.6672036866579938       1.7639211976585618       1.8458365785622113       1.9171939744883493       1.9806622501717974       2.0376448969383554
-8                        0.4800000000000111       0.09999999999999999      0.10000000000178554      0.100000023421484        0.10000329371899097      0.100035146656596        0.10017759483105082      0.10059232862896743      0.10148519639660956      0.10309096193613908      0.10560808653180936      0.10915791982593238
-7.805702049872813        0.35998142393788424      0.09999999999999999      0.10000000000255584      0.10000002878913693      0.10000385839417285      0.10004083115001823      0.1002057855802224       0.1006868807898499       0.10172567165893205      0.10360144531932132      0.10655305966647476      0.11073049014835305
6.805970149253724         -12                      0.10000000000000009      0.10000000052565187      0.10000123109935077      0.10005825153394408      0.10040497409587108      0.10145440513988556      0.10360869177587317      0.1071463397829846       0.11212399798159024      0.11845661079774296      0.12591651260067102
6.6867191177733325        -11.806522944233365      0.10000000000000044      0.10000000236738492      0.10000340247254848      0.10012078797989911      0.10075395892881633      0.10250963996619555      0.10588462882239792      0.1111661684774138       0.11832519762773032      0.12716628887464768      0.13734694118391846
7.044776119402979         -12                      0.10000000000000002      0.10000000011477368      0.10000041760625837      0.10002635707554193      0.10020538920563682      0.10080510744468522      0.10214541152139427      0.10449596474503407      0.10799302320247926      0.11265525918792675      0.11836161073773067
6.925374817164088         -11.80539507201172       0.10000000000000009      0.10000000052089343      0.10000116737268676      0.10005543404354178      0.10038939121231787      0.10141597030846704      0.10356093562841458      0.10714127862487773      0.11226080075887514      0.11887203978711415      0.12676474710529753
4.383396976826513         -9.923583649790471       0.10039265389628137      1.3190991201954163       1.6249562043908605       1.8136696904125373       1.9538874949005443       2.060757896378096        2.1462862212496927       2.21814656298271         2.2802650622619414       2.335064617602032        2.3837871728907416
4.274549493511537         -10.11882001406402       0.10012052364343753      0.8456096096195612       1.173625297682596        1.38114156486986         1.5361402752637046       1.655309755864801        1.7511869484171927       1.8319570385316688       1.9019091988599468       1.9637290536592091       2.0187929515213434
3                         -9                       0.10037313795055157      1.3189607168532194       1.6248384076046232       1.8136274918190212       1.9541913690368051       2.062006809862645        2.1493910799036073       2.224239215416249        2.290535529752677        2.3506554477269455       2.4056873226149222
2.8292183501133046        -9.082718677295635       0.1001384451848389       0.7914197570409839       1.1188319706467562       1.3275213082883586       1.483905562595466        1.6050823990540841       1.703793050125135        1.7884331890648915       1.8633890578576138       1.9313415512382035       1.9935428457713023
3.121680149777851         -6.392257569794618       0.10022286729627317      0.2966420970580984       0.3433896160030209       0.3865081396639544       0.4384327669354096       0.49682576196628553      0.5592186504375465       0.623276678478088        0.6871940517103251       0.7497675212237208       0.8104980215378058
3.0646636715629394        -6.441680579822176       0.10006461668473511      0.2572229883333547       0.3059261750326027       0.35089853430258744      0.40542081598653823      0.4671582804437641       0.5334016449777989       0.6015791155330383       0.6696952185687991       0.7364187033259687       0.8011950829869047
-1                        -6                       0.10047373620916115      1.3189183639807713       1.6251804880144822       1.8156487283787037       1.9593252046142322       2.0713667558897213       2.163958433808012        2.2449343707523415       2.3182137255465465       2.3860644323680953       2.449401990077712
-1.143884206916103        -6.063785402569012       0.10012441115390029      0.8622081017283508       1.1907709149102594       1.4001008882353163       1.5589056984693002       1.6838288336035705       1.787637296812169        1.878688676205302        1.9612379724836655       2.037772292811447        2.1092885058394395
0.3833969766309869        -6.923583649871638       0.10039689359594202      1.3190574330988223       1.6249218855277534       1.813731489498332        1.954423117008086        2.0625861107019765       2.1506552473955907       2.2266305336175978       2.2945743726108945       2.3569089090455004       2.414724616464816
0.28458833117394083       -7.120655447525296       0.10011071000361384      0.8349217999790982       1.1628638054464435       1.3706790192590539       1.5262545632611155       1.646720891951473        1.745065882503163        1.8298687618466196       1.9056470925564903       1.9751629752874675       2.0396848598385913
2.8305665400858278        -6.1533587907354645      0.10016108185223242      0.29660367517509123      0.34224533126921225      0.38273363198802535      0.4323573658276547       0.48987485102523237      0.5528020366584689       0.6185307832162912       0.6848516898776962       0.7502214492947645       0.8139294759172089
2.782240316229016         -6.213659711698853       0.1000649990234292       0.2530665394754019       0.3010003955847899       0.3439464057655823       0.39673398075910976      0.4579669808074564       0.5249357165055003       0.5948406480293421       0.6653370124811762       0.7347951122860801       0.80247036368503
-3.4440285048091397       -3.831201357394969       0.10046527570584732      1.3191226558419045       1.6253729149688514       1.8158969884269902       1.9596355214108507       2.0716468602117035       2.16395786086188         2.2442483424466237       2.316352808869138        2.3825348642599367       2.4438060065044107
-3.48518070349959         -4.020112259653968       0.10017781818577208      0.8701271908425258       1.1988329435341702       1.4084221954509835       1.5675282119031693       1.6924861547990198       1.7958172043556193       1.8856842582317077       1.966279173821168        2.04013079658089         2.108395287372108
-4.555971495102654        -2.168798642546032       0.10037822372307863      1.3190384585484072       1.624961426028881        1.8140441638834146       1.9552007436055805       2.0635849477574206       2.1511075966643745       2.225358212393026        2.290220285004663        2.3481085785185076       2.4002901304906263
-4.711399456764236        -2.081040714898533       0.10016222335995227      0.8199219041596661       1.1477911738578088       1.3561806125865308       1.5125494209290162       1.633665264388058        1.731928609685663        1.8154262349426624       1.8884053577327593       1.9535519029399608       2.012282438015236
-3.4827884749598352       -0.28289693959088763     0.10017630337700523      0.29663102517903955      0.3428406834638372       0.38333674328511136      0.43006417353340043      0.4815275137092501       0.5361679727638697       0.5923539423045981       0.6486878736640562       0.7041818545771427       0.7583633853890424
-3.5324805429734734       -0.22238859805319067     0.10018786080380226      0.2966070993211984       0.3419819430970421       0.3800693736519684       0.4237516717700694       0.472343361873317        0.524484313071003        0.5785864920563524       0.6331879378284507       0.6872245016259324       0.7401585046231203
-3.568894034272813        -0.277801026374049       0.10006585891545028      0.2572829566383022       0.305090719893026        0.3461078284020413       0.39326351572343987      0.4455295489453876       0.5013916431771693       0.5591636646113921       0.6173352273351123       0.6748175395969          0.7310684721174456
-8                        0.7200000000000113       0.09999999999999999      0.10000000000558266      0.10000005101768088      0.10000574836269131      0.1000562090890017       0.10026443976447168      0.10082720987116743      0.1019733776095711       0.10393334228445344      0.1068834082329716       0.11090636178618725
-7.805712996786341        0.5999709295710908       0.09999999999999999      0.10000000000852101      0.1000000642092631       0.10000669535194377      0.10006432882668082      0.10030021084622849      0.10093722784302073      0.10223824546392112      0.10447566754009503      0.10786432909778317      0.11251518553228064
7.283582089552233         -12                      0.09999999999999999      0.10000000002344571      0.10000013531395906      0.10001148102713357      0.10010034777345515      0.10043035542378657      0.10123706113001023      0.10275271212266641      0.10514728433821073      0.10850407530292816      0.11278622929652865
7.164272687881191         -11.806027058108462      0.10000000000000002      0.1000000001059342       0.10000037787299287      0.10002430016963414      0.10019233563892778      0.10076629254845303      0.10207654799315409      0.1044179604040829       0.10796645351989924      0.1127774382281241       0.11875429183100118
7.522388059701489         -12                      0.09999999999999999      0.10000000000452157      0.10000004242565723      0.10000487458443212      0.100047879625909        0.10022537142210734      0.100702246697611        0.10166436065192179      0.10328319522253289      0.10567248395572958      0.10885168192058141
7.4021028343957305        -11.812227201946179      0.09999999999999999      0.1000000000198346       0.10000011590067404      0.10001021647972906      0.1000913072565756       0.1003999993977512       0.10117437271157186      0.10266110759240003      0.1050596447429213       0.10848391743688222      0.112921729026233
4.55597149514254          -9.831201357427288       0.10041094934469592      1.3190837143079372       1.6249437272307101       1.8136633872328454       1.953882741645171        2.060749298316005        2.14626123221046         2.218085623775797        2.2801438284654627       2.334857931863655        2.3834746916054885
4.521059367372337         -10.023042571607872      0.10017249119892335      0.8558600827581536       1.183855108561983        1.3911188416292761       1.5458860301769708       1.66482153691746         1.7604682214663987       1.8410044851131866       1.9107107640249195       1.9722683771505165       2.027057492215683
3.0193560755193456        -8.804200374415117       0.10043885545496344      1.319244078564183        1.6250683124497696       1.8139279699232227       1.9548070850703687       2.063305429544642        2.15177453035887         2.2280867589242916       2.296142276041074        2.3582204904831183       2.415317680880278
2.872588854622589         -8.844393441917257       0.10019206634579489      0.882153628509337        1.2100476569591914       1.4167772769695013       1.5715837623399682       1.691567261150005        1.7896986285654886       1.87439356721518         1.9499144221234945       2.0187933397706774       2.0821501635085182
3.2                       -6.4                     0.10014975372476087      0.296645476347959        0.34398055794393795      0.3882443819777873       0.44090090767612156      0.4993142987099662       0.5611781150641113       0.6243538300124357       0.6872112574387739       0.7486692920502673       0.8082835101809203
3.126675591363636         -6.455994416712767       0.10006397562840862      0.25728898367468805      0.3065396073619639       0.3526190955625406       0.4079675708250634       0.4699703034297879       0.5360283595002368       0.6037150876477516       0.6711726845492385       0.7371685141095913       0.8011955193021548
-0.9806439244945472       -5.804200374484697       0.10038646882426254      1.3189118203082946       1.625141972053077        1.8154440466370323       1.9589176247104414       2.070785517168391        2.163246307275758        2.244125739976382        2.317327839840133        2.385113352830568        2.448404967074142
-1.1622301841823208       -5.897347213179685       0.10012654099324526      0.8087140924765283       1.136920524912976        1.347517988551232        1.507553269288709        1.6337671899295          1.7388230096897594       1.831053843760931        1.9147258999303463       1.9923427096553297       2.0649113170618594
0.5559714951015258        -6.831201357454721       0.1005961419553691       1.3191000754923612       1.624957636999962        1.8138820716628603       1.9549416007055693       2.063820468707499        2.1529377605042668       2.2302258554132957       2.299636301126106        2.363487114146179        2.4227903950730947
0.5462195464952856        -6.998087188500769       0.10014401676502248      0.8831585690100782       1.2110308958524587       1.41775707994149         1.5726642648525724       1.692938625095161        1.7916383113094485       1.8772615175108458       1.9541455113057962       2.024879901364209        2.090610991164524
2.8077576611733686        -6.0783960944933755      0.10017661588382139      0.29661675103847684      0.34248563942825416      0.38342312909400433      0.4333875660347401       0.49110282635912356      0.554163101768042        0.6200140017964081       0.6864685143130743       0.7519893247696451       0.815859821256591
2.7478488645470422        -6.1215686874325455      0.10006946496565881      0.2536487480992989       0.3019034303189598       0.3454755837982582       0.3987142509208754       0.46018283523720477      0.5272876182214655       0.597308973332555        0.6679364636011962       0.737550445455875        0.805398200282661
-3.2927576509738032       -3.7069711873505926      0.1004211016500391       1.319028730606691        1.6251152001765388       1.8150423453118336       1.9580045062516642       2.0693646039040083       2.1612883975612895       2.241515755174267        2.313866517359767        2.380565867610739        2.442574054804455
-3.3110629737572075       -3.9017107397071156      0.1002248197716022       0.8911083853287828       1.2193674713357388       1.427689283406312        1.5855401374950675       1.709516634533281        1.8122756380575056       1.902008782047028        1.9828496292253077       2.057251553498469        2.1262979272408247
-3.4222610788549934       -0.33256580225004245     0.10015882652859401      0.29664650524095665      0.34363903849044636      0.3863203058146753       0.4358417504542897       0.4900340319739897       0.5471423422138431       0.6054665209738099       0.6636390221891325       0.7207212121845133       0.7762917663170511
-3.508646552499676        -0.35204101104131613     0.10006978539461726      0.25369021817020637      0.30270365951147865      0.3468100069385465       0.39778829523476805      0.45369015082586567      0.5127702922164518       0.5732858494457992       0.6337937320948878       0.6932878051105288       0.751298587927513
-4.383396976788897        -2.0764163501939126      0.10038861286561498      1.3190883529457056       1.6250747061932511       1.8145463939513016       1.956430076394981        2.0657357949923645       2.1542967260760983       2.2296734864827013       2.2957576374193924       2.354973822228102        2.408586556908465
-4.514970725999093        -1.9535404072683769      0.10016487821311794      0.8095537981234454       1.137367475229473        1.3463873624703384       1.5037680195639938       1.6261440362941784       1.7257991857138555       1.8107745191953477       1.8853250267860735       1.952151114809139        2.0126717691862424
-3.569433459913079        -0.15335879073809533     0.10025569700711993      0.29659483610867         0.3412653770376341       0.3772170168320826       0.41817478320202106      0.4642331254313714       0.5142126287377031       0.5665537496064411       0.6197225060413397       0.6725754891064765       0.7245115748150764
-3.60973824822395         -0.18821885102196298     0.1000779690634166       0.26362813212379044      0.3102262894588807       0.34818688304258866      0.39151704756698896      0.440161943295274        0.4928430172155586       0.547921385001304        0.6038073407177451       0.6593209819754465       0.7138452163858052
-8                        0.9600000000000115       0.09999999999999999      0.10000000001602849      0.10000010668067168      0.10000987382425837      0.10008938271102961      0.10039486306032419      0.10116747814890602      0.10266231924780278      0.10509979714022777      0.10862490782332228      0.11327069643848488
-7.80572338947876         0.8399658871390402       0.09999999999999999      0.10000000002641928      0.10000014097653838      0.10001179377940005      0.10010390189708306      0.10045205556741081      0.10132641267301003      0.10301603171826625      0.10577960345624966      0.109795964066379        0.11512169349688127
7.761194029850746         -12.000000000000002      0.09999999999999999      0.10000000000084963      0.10000001358045385      0.10000213485751656      0.10002358930175415      0.10012185993245519      0.10041144030917344      0.10103585055678259      0.10214903254037029      0.10386835391710847      0.10624059119958762
7.639042580367985         -11.821372332761953      0.09999999999999999      0.10000000000349163      0.10000003475283027      0.10000424951355058      0.10004300198772398      0.10020779895045763      0.10066370762548076      0.10160455735985897      0.10322099739650166      0.10564800310856137      0.10892367470009394
8                         -12                      0.09999999999999999      0.10000000000026221      0.10000000642374306      0.10000123953665518      0.10001468286772411      0.10007990996392212      0.10028170352399422      0.10073143965707652      0.10155581971356667      0.10285604211135439      0.10467948199816227
7.837823611001556         -11.843548623122388      0.1                      0.10000000000077194      0.1000000130772474       0.1000021324417337       0.10002390332068938      0.10012491273251226      0.10042602500575433      0.10108066654540009      0.1022562040262602       0.10408207505119985      0.10661272061081684
4.707242349026325         -9.706971187350462       0.10036845107319801      1.319000359903744        1.6248894111291967       1.8136154620380334       1.9538390144126374       2.060702934785611        2.146201585700117        2.217995909498298        2.2800018866763256       2.3346397329894275       2.3831604318654143
4.718711934974166         -9.919836360478836       0.10017204793878783      0.8071047874219798       1.134748572872004        1.3430858597584976       1.4988637537776544       1.6188233878432852       1.7153999065925234       1.7967404330901149       1.8671340851738398       1.929280503221001        1.9845778755390249
3.0762694383587577        -8.616957117948976       0.10049197109247825      1.319065439678698        1.6249654706009427       1.8140348067961074       1.9554442828606577       2.0648450071922277       2.1545609978474305       2.232402461729897        2.30217860538128         2.3660827078145608       2.425042289827193
2.9345531618397303        -8.606028534473499       0.10012319348553984      0.8878384961667077       1.215747274790156        1.4225357995009988       1.577825541268976        1.6987997146653988       1.7984148574053151       1.8850085751381165       1.9627152320639174       2.033943689337699        2.099715242155829
3.2783960944074924        -6.392242338843796       0.1001745609079834       0.2966637716160286       0.34429976072184704      0.38901192936164886      0.44163844257674667      0.4994321802773866       0.5602662045245789       0.6221864219204719       0.6837080621256976       0.7438445383243428       0.8021864214771742
3.242487960500425         -6.472802804257703       0.10005521759179957      0.25010915235559655      0.30055929829630307      0.3487193888237401       0.4056210200861492       0.46824200277487543      0.5341909566641029       0.6012963083968105       0.6679291907470125       0.733015514241884        0.7961178938305781
-0.9237305616457658       -5.616957117959885       0.10046592552510768      1.3191676675046402       1.6252028334565716       1.8150885738177747       1.9580153591078164       2.0693846390645514       2.16142729098975         2.2419546999287747       2.3148377962241047       2.3823199650889086       2.445335119504472
-1.0710419976015364       -5.647230823519443       0.10020441403727338      0.9105175641134468       1.238418381779081        1.445850935914423        1.6028026545551726       1.7260095351074516       1.8283080688767384       1.9180242664250258       1.9993508146326924       2.0747374901031472       2.1451926979429605
0.707242349014842         -6.706971187361952       0.10041696408480778      1.3190857900244939       1.6249828146751686       1.8141112858036452       1.9557025468067062       2.065448707712583        2.1557161711035246       2.234363771176734        2.305254654972661        2.3706263629794697       2.4314280085013076
0.6583906119772216        -6.906301390627907       0.10018275085481702      0.9310234223779205       1.2582653492266125       1.463714890149623        1.6177468694745696       1.737478593313255        1.835978926868695        1.921680696899695        1.9988184531848776       2.0698882449078133       2.1359726097004037
2.8000000000000003        -6                       0.10018017538402735      0.29660851864917065      0.34257373990095996      0.3837031770606044       0.43381653533375375      0.4916184723007253       0.5547336892835417       0.6206300508472852       0.6871314186181837       0.7527049052521071       0.8166334354851525
2.7402692939139333        -6.026117171942865       0.10006359699978386      0.25805125463532014      0.30628714009029717      0.34992688170502945      0.40307778064435285      0.4642943746637482       0.5310602834089285       0.6007135599857015       0.6709753790889268       0.7402416308899392       0.8077614547058035
-3.1685854943201535       -3.5556526970555766      0.1003660482760437       1.318992706625136        1.6249707254534276       1.8143876748877845       1.9565348832725944       2.067031821987711        2.1582084833194215       2.2379099932638438       2.3099960982262724       2.376697146086841        2.4389456907351175
-3.138653900507556        -3.7594050651649447      0.10017899223893031      0.8552435866141505       1.183457932747137        1.3919957605012059       1.5497594357301863       1.6737693868926162       1.7767892203092608       1.8670741842593608       1.9487592727728746       2.024274216078264        2.094656838160502
-3.3532171528294676       -0.3694922246527409      0.1001619420562935       0.29666104570464896      0.3441779083858159       0.38835982261061164      0.439940436590974        0.49632047047149536      0.5555568396306259       0.6158442235011891       0.6757897886539945       0.7344593927851746       0.7914572871458182
-3.4268492756686646       -0.4129923887627057      0.1000629772406686       0.25203984759038445      0.3020862828708642       0.3488363637752738       0.4031493066991925       0.4623544445785161       0.5244790161963025       0.5876879492636444       0.6505568110752932       0.7121242260420358       0.7719739886900201
-4.195990236092137        -2.0193941529051807      0.10040724171965679      1.3190757523952776       1.6252152600428662       1.8152640694374977       1.9580643476380457       2.0684365604761124       2.1581624973375875       2.234799083228954        2.3022562116728293       2.3629661529185446       2.4181773650301506
-4.290063329945299        -1.8831718385064948      0.10014747649180404      0.8407843518303196       1.169102165249985        1.3781571252801188       1.5360043231977674       1.6590000146926922       1.7594265925937267       1.845331304672692        1.9209821918497771       1.9890799101912748       2.0510225729477685
-3.592242338826641        -0.07839609449332079     0.10017602730781006      0.29657858875752646      0.3407911744542833       0.3752875380717536       0.41436429299945515      0.4586823896861895       0.5071922318597446       0.558351613679253        0.6105716289512424       0.6626498150018425       0.713939037095456
-3.6378980816338333       -0.13949397083785606     0.10006207572369707      0.2585413497382188       0.3049632866630106       0.3419458207339863       0.3840028756571359       0.4315366576860522       0.4833596249521605       0.5378338824047869       0.5933139334486618       0.6485637426563553       0.7029242238856911
-8                        1.2000000000000117       0.09999999999999999      0.10000000004182623      0.10000020960647242      0.10001623972326863      0.10013720813047015      0.10057357364924589      0.10161588247465884      0.1035442077880187       0.10656129592650332      0.1107723447890493       0.11615326191455416
-7.805732508291414        1.0799708301986246       0.09999999999999999      0.10000000007462552      0.10000029229660645      0.10002006804652941      0.10016365576672114      0.10066960452591477      0.1018625817459271       0.1040572638390767       0.10748934694280997      0.11229049582442997      0.11845202313936269
8                         -11.76000000000002       0.09999999999999999      0.10000000000057681      0.10000001076626185      0.10000183600605402      0.10002088108657263      0.100110281509655        0.10037936215777969      0.10096815315972074      0.10203114303431138      0.10368890650981721      0.10599384361778989
4.831414505686813         -9.55565269704515        0.10037348432758293      1.3190730866117155       1.6249413962185393       1.813660065427248        1.9538783819206822       2.0607374056122034       2.146226856910727        2.2180023719962088       2.2799749055856635       2.33456213470048         2.383017229777137
4.890903787506179         -9.75449591408572        0.10015224166015653      0.8067143885960092       1.1343738626678765       1.3427219475443584       1.4985086180984366       1.6184708676949013       1.7150375858638933       1.7963480987159757       1.8666851345148296       1.9287462699916669       1.983934978143146
3.1685854943790073        -8.444347302856361       0.10043382017109943      1.3188655384877057       1.6248644933397653       1.8142927970817053       1.9564237395031876       2.0668245151098574       2.157729912558802        2.236873709396039        2.3080040719105432       2.3732681163704403       2.4335644224226316
2.9817783123030788        -8.425029778030103       0.10008799056257935      0.8022630659639914       1.1299131163511846       1.3390014274525737       1.4968613818896925       1.620808840404834        1.7235664542907716       1.813351223801334        1.8942319717846376       1.9685742026394897       2.0373664275503813
3.353358790700803         -6.369433459928561       0.10024113558421628      0.2966580609439521       0.3441742553230864       0.3883538039627555       0.4399311463062288       0.4963074750463503       0.5555396935914247       0.6158218067265032       0.6757585577643687       0.7344116263562913       0.7913780902168915
3.3409379945173745        -6.427027723793476       0.10006962573861529      0.2644465157277276       0.31415860356339514      0.36101031426895186      0.4158129738780868       0.4756916819084399       0.5385338518856955       0.6024066405553612       0.6658406074291282       0.7278561557229228       0.7880414418525391
-0.8314145056275096       -5.444347302866114       0.10047091662951886      1.3189477910122283       1.624939339993188        1.8144180037664652       1.9566797443820418       2.067317688948509        2.158635753190782        2.238465045331984        2.3106714409108884       2.37750271592618         2.439918730212557
-0.9782552624734309       -5.422054591548148       0.10012566868656159      0.8872134432500199       1.2152344559222505       1.4227399483863807       1.57945109734573         1.7024116809557184       1.8045008397679096       1.894040339378391        1.9751985516410995       2.050419877694005        2.1207395642847717
0.8314145057156919        -6.555652697001941       0.10037102101862197      1.3190399035397995       1.6250196120249611       1.8144876038316433       1.9567421423979718       2.067370264511034        2.1586638752805833       2.238433059653407        2.310507337783104        2.3770921671528953       2.4391015436070886
0.8653043564712363        -6.772303008237617       0.10014900775984263      0.8256751978300327       1.153649317082866        1.3622377167527884       1.5195802539681524       1.6430152546512542       1.7453986292760233       1.8350512449735186       1.916131715545074        1.9910742551771328       2.060903072601868
2.8077424301986174        -5.92168014981173        0.10025418799009876      0.2966187523830181       0.342487819115026        0.3834256040221951       0.43339022445424596      0.49110552236063953      0.554165938360971        0.6200175683852798       0.68647453780973         0.7520013143833255       0.815884126354525
2.754768083297886         -5.928333641611323       0.10007687248141428      0.26361464033425913      0.311488871099268        0.35459454985245287      0.4071609536920547       0.4677892157857616       0.533964315988951        0.603026736723447        0.6727031702969936       0.7413960402811333       0.8083610657176425
-3.076269438340442        -3.3830428820068543      0.10034906487531947      1.3190726277850646       1.6249754243813954       1.8140509799641291       1.9555242061297013       2.065159435163825        2.155447191001762        2.234367580732921        2.3058659954200644       2.372214854100729        2.4343383666069545
-2.978058045017579        -3.578462088748444       0.10013881721474571      0.7899003639567977       1.117374114701886        1.3267182558095758       1.4848781165932934       1.6092714123937917       1.7127254549678634       1.8035983457160463       1.8861006868453971       1.9626987530346234       2.0344114373360043
-3.2783198502220277       -0.39225756979464277     0.10021458929701244      0.29666539917556695      0.3443016563888899       0.3890142657439262       0.44164161981257677      0.499436548781836        0.5602724217727881       0.6221961780291568       0.6837261223861691       0.7438808091313058       0.8022594446544206
-3.325251941509093        -0.44979651528487674     0.10005889030634663      0.2544600823140862       0.30481668925670863      0.3526827336500021       0.40874095553090656      0.4699935835926818       0.5342479055771224       0.5995152580234383       0.6642995176861958       0.7276114017489043       0.7890466648397115
-4                        -2                       0.10054798834747121      1.3190350329316693       1.6253581969250412       1.816031775190198        1.9597148512320273       2.071091282582507        2.1619412796944455       2.2398450963105008       2.3087267721264233       2.371010514644976        2.427907755244313
-4.040480393429527        -1.8709673625037158      0.10017973958214063      0.9046691537702373       1.232919381828833        1.441132919895071        1.5986372281029755       1.721471094190827        1.8219939533374763       1.908286924188586        1.9846137280510903       2.0536428066892913       2.116716249008095
-3.5999999999999996       0                        0.10020926557020952      0.2965705773617792       0.34062552599033347      0.3746049866131634       0.41300754515042043      0.45670262020382385      0.5046884853523115       0.5554290029409429       0.6073147867598724       0.6591215010409428       0.7101851344706761
-3.6603629226335315       -0.023930707233470752    0.10005340403986666      0.25771640308224836      0.3037535834567335       0.339431155120307        0.37979594162496916      0.42578141385279783      0.4763180904635885       0.5297801350025991       0.5844669667480992       0.6390847064848355       0.6929300823009296
-8                        1.440000000000012        0.09999999999999999      0.10000000009855807      0.10000038374004676      0.10002533838084658      0.10020120638411423      0.1008011065816814       0.10216520743454001      0.10459341891702732      0.10826241277986769      0.1132308225135293       0.11941421960885802
-7.805743039391115        1.3199840181644296       0.10000000000000005      0.10000000019057394      0.100000565483411        0.10003248246059855      0.10024706397954415      0.10095750685284821      0.10254416081796665      0.10534161599452342      0.10955208153541564      0.11525081687280149      0.1223581066175483
8                         -11.520000000000021      0.09999999999999999      0.1000000000018035       0.10000002321719963      0.10000320066616346      0.10003368402992896      0.10016752362162333      0.1005476636029649       0.10134651585271236      0.10273998723309281      0.1048568643958022       0.10774063296658935
7.788881444789055         -11.636370782849962      0.1                      0.10000000000309692      0.10000003104456531      0.10000389599892524      0.1000399815797334       0.10019568449325546      0.1006327248838779       0.10154481558714853      0.10312832476055943      0.10552642045515068      0.1087864874307337
4.923730561690251         -9.38304288193283        0.1004079756820749       1.3189361366184542       1.6248348777529367       1.8135721426561042       1.953802355898411        2.060671005204983        2.1461685086363613       2.2179497799279564       2.2799232527881848       2.334504715226936        2.382947853772908
5.034250039672426         -9.543515744765084       0.10012834626744559      0.8046475704067761       1.1322155017853044       1.340588675570511        1.4964060064843518       1.6164063087813674       1.7130063928098382       1.794337724604883        1.8646776955286948       1.926721466625979        1.9818750780310725
3.292757651023718         -8.29302881259947        0.10035530162228767      1.3190230500336941       1.6251213013604777       1.8150466761358641       1.9580004613357676       2.0693186727758346       2.1611183745563434       2.24107388333551         2.312926437949333        2.3788323756423337       2.4397065624942194
3.0908528264341224        -8.263997561449234       0.10012496604101229      0.8014081968515886       1.1290812238193804       1.3386605983806399       1.4973768789858821       1.6223724463176594       1.7262513169885294       1.8171566587389598       1.89912382897451         1.9745019837414544       2.0442758827263208
3.422388598014508         -6.332480542999348       0.10023003909035348      0.29664933867312365      0.343640793864481        0.3863192977479854       0.4358366596694718       0.4900245215366071       0.5471282365676557       0.6054471956684785       0.6636119802275824       0.7206806698770006       0.7762262045708046
3.4086770425096806        -6.415141232098772       0.10004476642162662      0.25574216484733553      0.305692085027089        0.3524338156469807       0.40680498543374766      0.46608427719968304      0.528274836013893        0.591526729596799        0.6544099058061895       0.7159601015825708       0.7757586997906839
-0.7072423489497269       -5.293028812572908       0.10042719698961071      1.318879671794485        1.6248270590827472       1.813982406698986        1.9555919863117632       2.0653597884300887       2.155675489038368        2.2344344541612093       2.305556410546253        2.371340334147047        2.432795513344228
-0.8911283216241129       -5.2343066534158496      0.10008673854353436      0.7886060061430608       1.1160313006082314       1.3253893126443612       1.4835709974393276       1.6079696432311419       1.7113592996709737       1.8020568569177373       1.8842707921368886       1.960498215557449        2.0318248520144775
0.9237305617148985        -6.383042881873396       0.10038780422455887      1.3189941904744138       1.6250893234988333       1.8149922238038425       1.9579303123026928       2.069303209157139        2.1613397323197767       2.241842090369133        2.314661243513122        2.382015257850368        2.4448081085632842
1.0136708134005612        -6.568727948922568       0.10015174901279876      0.8194819466851984       1.1475138020039763       1.3567831116835773       1.5152040865144534       1.6399256497349295       1.743694900429784        1.8347861347566086       1.9173450800351277       1.9937902297027625       2.065114424343815
2.8305077753404047        -5.84678284718706        0.10017701488072153      0.29660449164586206      0.3422460401804509       0.3827347535198185       0.4323588766674221       0.489876706712051        0.5528045947058182       0.6185352721827029       0.6848614914291636       0.7502433550326626       0.8139757360969447
2.757159052832753         -5.872482739005714       0.10006186270341522      0.25784888686660096      0.3058735259684719       0.34909675302460214      0.4019330027425587       0.4629768390402333       0.5296449064878824       0.5992263819114069       0.6694193532752611       0.7386122375141793       0.8060599714744195
-3.0193560755068645       -3.1957996255223717      0.1003849423484323       1.318978055324357        1.6248756281824785       1.8137951314861225       1.9548512491137229       2.0638610527559185       2.153432941526361        2.231665515740822        2.30259256373573         2.3685363846672707       2.4304225334328584
-2.8721754911857307       -3.3337872282641583      0.10012220447905999      0.7855441006007579       1.1127917481991687       1.3218160945494335       1.4792102649843606       1.602533119586729        1.7048103895638207       1.7945928805478488       1.876228689778381        1.952258033042275        2.023695772704191
-3.2                      -0.4                     0.10017437024480638      0.2966462072893041       0.3439817600309171       0.38824658700025966      0.4409037701296768       0.49931763569848936      0.5611823779834432       0.6243609234360438       0.6872268715353532       0.7487052273002219       0.8083615863209064
-3.2619709937109973       -0.4564927424447055      0.10005741160097585      0.25799556727703293      0.3080621763743867       0.35562456254800057      0.41171079861615517      0.4733455499123486       0.538213505394555        0.6042078785034536       0.6697458899189819       0.7337850160652127       0.7959055560406482
-3.8042003745668036       -2.019356075489059       0.10036656949931509      1.3190056713953544       1.6255071077197625       1.8165634566214803       1.9607916357452637       2.0728554688454346       2.164590947618722        2.243614516251464        2.3138411948508555       2.377658934816359        2.436220210742267
-3.9069487707634347       -1.8482615623016885      0.10014636047426749      0.8369679815490042       1.1656906244486687       1.3761788915297124       1.5359134049528962       1.661011891004953        1.7637661286900663       1.8522731917251656       1.9308258434411687       2.002104424262957        2.067431372636666
-3.5922575697867347       0.07831985026163055      0.1001743860978446       0.29657354353196713      0.34078661104075225      0.3752825751721643       0.41435866897626994      0.45867616712460335      0.5071855801436594       0.5583447095653682       0.6105646051789598       0.662642759979721        0.7139320093668912
-3.666410140357344        0.0424789094807177       0.10005668341308883      0.25354620625092644      0.2997541678339349       0.33566498561409824      0.3763174935987113       0.4226231165387815       0.47349625102570064      0.5272999339600194       0.5823266211674215       0.6372780256310406       0.6914488359038183
-8                        1.6800000000000122       0.10000000000000002      0.10000000020836401      0.10000065089658745      0.10003733774082986      0.10028062832565406      0.101070756652903        0.10279335278576705      0.10576056347913858      0.11011563625465776      0.1158667090873849       0.12286999956594108
-7.805759744528352        1.5599994631258312       0.10000000000000005      0.10000000043707032      0.10000101399486257      0.10004970410748015      0.10035514725358237      0.1013121769261629       0.10335221054577122      0.10682047601569118      0.11187599309357878      0.11853159899650102      0.1266360058906776
8                         -11.280000000000022      0.09999999999999999      0.10000000000561153      0.10000005098649238      0.10000570443916677      0.10005545293997735      0.10025890332213754      0.10080125105914801      0.10188946982700268      0.10371256590114046      0.10639508727924678      0.10995748822439834
7.807289136397061         -11.387361861949737      0.09999999999999999      0.10000000000901295      0.10000006631216185      0.10000677279346347      0.10006424932233392      0.10029562913506783      0.10090694109138139      0.10212847381859115      0.10417205100509559      0.10717894365025059      0.11117541095547091
4.980643924509411         -9.195799625440857       0.10041387921115495      1.3187778447832872       1.6247142834126878       1.8134615854250102       1.9537024351931247       2.0605833669080993       2.1461007426021776       2.217911925037111        2.2799247994942586       2.3345537961981644       2.3830522850723193
5.133702074910049         -9.382099888691727       0.10008487836954007      0.738110897941839        1.0639552817149796       1.273360003408173        1.4303069374515478       1.5515963361052394       1.6494390961965502       1.731898838756735        1.8032586038946081       1.8662331250833089       1.9222432701061878
3.4440285048735095        -8.168798642561976       0.10039248363639051      1.319108712610916        1.6253723910073128       1.815896714508208        1.9596329619571689       2.0716281824580767       2.1638865268956278       2.2440530555202676       2.3159134436824336       2.3816828529664966       2.4423317983127872
3.2853721175831883        -8.07536113875501        0.1001457057840945       0.8038711068280181       1.1319921681125213       1.342488080174306        1.5024091467177787       1.628502076999279        1.7332409578019943       1.8247337166892128       1.907062311692483        1.9826368302850514       2.052498144603337
3.4828969395839864        -6.2827884749667415      0.10018463498204842      0.29663049165937455      0.3428391637289974       0.38333153289954375      0.430053685305949        0.48151177674715356      0.5361473164873434       0.5923283730831125       0.6486559198587613       0.7041394815094865       0.7583020909593433
3.467712468580343         -6.367536508546488       0.10005929665242487      0.26144016743183657      0.310459858044461        0.3551069479136602       0.40682948404235925      0.463405982539636        0.5230228572057501       0.5839196619488325       0.6446739722773239       0.7043046615203951       0.7623629428675381
-0.5559714950657841       -5.168798642521371       0.10035379050879478      1.3190148087017          1.6249137309245825       1.8138436900551747       1.954912150996661        2.0638121738976474       2.1530000402108525       2.2304618518120747       2.300226779992157        2.364692020633702        2.424940174193048
-0.7506795387361053       -5.101881711597975       0.10012657898953266      0.7993921419458855       1.12688404149562         1.3357363328993654       1.4930515558808313       1.6162646581969515       1.7182618849243132       1.8074584318372502       1.8881537822323613       1.9629231210250893       2.03291239455752
0.980643924548682         -6.195799625244174       0.10049866241503529      1.3191343598877863       1.6253057935204123       1.815597561602126        1.9590600507750058       2.070922742278374        2.1633769782405343       2.24424287980193         2.317415343460003        2.3851436726892246       2.448335750048552
1.1040974198441238        -6.335740330002083       0.1001562802349596       0.8407003083869148       1.1690237050663344       1.3784442608194831       1.5372460053323957       1.662282549192117        1.7662921050787113       1.8575851918269028       1.9403631916975932       2.0170781061879097       2.0887188988741685
2.8674341977324143        -5.777738921171258       0.10021310404062093      0.29659760769778004      0.3420221599632532       0.38210554618058595      0.43144541805433057      0.4887930261180183       0.5515722921833117       0.6171228218037746       0.6832271573058476       0.7483529217122081       0.8118130321266523
2.8032435006527554        -5.7635621676468665      0.10005432728588183      0.257234960139408        0.30489038106530497      0.34739431812174854      0.3997181347773755       0.4604901359837576       0.5269861605663858       0.5964025348481256       0.6664029478532266       0.7353709439663793       0.8025782447620492
-3                        -3                       0.10034319807860408      1.3187560012282757       1.6246968620650246       1.813578397479682        1.954500435491555        2.0632834206508406       2.152581902165067        2.230542538706526        2.301236631721332        2.3670082176006093       2.4287845908783594
-2.803598021544871        -3.149791156378971       0.10007965608943238      0.71681132261435         1.0418102285738253       1.251624564839516        1.4097991760897395       1.5339782666314878       1.637061658895821        1.7276253852452417       1.8100933881573502       1.8870601218607275       1.9595441173499741
-3.019394152908388        -2.804009763891815       0.10035106777737184      1.3189110719717327       1.624835544434364        1.813759667572133        1.954820473265358        2.0638326067041186       2.1534063364343976       2.231640708743746        2.302569432705879        2.3685146647514768       2.4304019585362227
-2.7962081279115205       -2.907140801974024       0.1000782086139933       0.7131468927817127       1.037975498668634        1.247805606797314        1.4059807631640455       1.530146819118517        1.633204568211827        1.7237415937350333       1.8061946953245902       1.8831662976395782       1.9556753815554502
-3.121603905394331        -0.3922423388041875      0.1002086539212493       0.2966335236521          0.34338137040789085      0.3864993950191024       0.4384235957528342       0.496816923989778        0.5592114812866359       0.6232739227293218       0.6872024604737307       0.7498004752876272       0.810579888018094
-3.153476276219643        -0.4612268233281242      0.10006872128643536      0.25632330532056674      0.3058498565614611       0.35244106362640576      0.4081794843302444       0.4703371891507682       0.5363643549059128       0.603898051734768        0.671142358753512        0.7369122380134839       0.8007308161601397
-3.616957117961601        -2.0762694383535227      0.10035027346500329      1.3190438802156645       1.6255065544128773       1.816497489226813        1.9607341162046399       2.073015943021794        2.1652633029898083       2.2451238993002245       2.3164761494449357       2.38164763497648         2.441719003987991
-3.643346884748338        -1.877965113443931       0.10014297669438676      0.782628484736284        1.110854100159601        1.3228651109631289       1.4842750009227361       1.611359222491356        1.7163803532002302       1.8074434869638922       1.8888137310880284       1.963116257362297        2.031590709627326
-3.5694922246466674       0.15321715284411203      0.10018718361906889      0.29659430775018963      0.34126404039943775      0.3772134254507371       0.41816791713518103      0.4642230670674067       0.5141997936337471       0.5665386283615079       0.6197055116437427       0.6725569385780577       0.7244917065210992
-3.6309364806933324       0.13974043874024097      0.10008650330469551      0.26236337456454295      0.30864354293399554      0.345506924364478        0.38742692069220686      0.4347858136839006       0.48640089443262         0.5406429090959312       0.5958764861766465       0.6508737143452591       0.7049805348485322
-8                        1.9200000000000124       0.10000000000000002      0.1000000003925685       0.10000101808669348      0.10005180495299404      0.10037136055427635      0.10136649293042561      0.10346085974912121      0.10697073301556759      0.11200141621076093      0.11851031180947763      0.12629903026996858
-7.805802430693337        1.8000072515811676       0.10000000000000007      0.10000000089381368      0.10000167625761425      0.10007163058771505      0.10048452974180022      0.10171776592630943      0.10424481248268176      0.1084110897797582       0.11432569270655936      0.12193730319223016      0.1310272778879857
8                         -11.04000000000002       0.09999999999999999      0.10000000001602383      0.1000001066613666       0.10000985119058324      0.10008897510391868      0.10039175205101185      0.1011522385355799       0.10261138924527258      0.10496111971849319      0.10830898125278084      0.11263985332609684
7.8077359935332735        -11.155659855162297      0.09999999999999999      0.10000000002660658      0.10000014151875812      0.10001178794451814      0.10010344046877363      0.10044762521674207      0.10130310732145507      0.1029367953284085       0.10556460370613481      0.10931120705739757      0.11416682537739704
5                         -9                       0.10052332448227495      1.319042633731252        1.6248806864284984       1.8135995921612589       1.9538272313911647       2.0607196981484335       2.146274122537284        2.218149475533605        2.2802534112156274       2.334999584990327        2.3836407616201587
5.14530775947825          -9.140474341536352       0.10008357009194344      0.8409827190635879       1.1689620551064264       1.3765741373806537       1.5316651634070622       1.6509207365998773       1.7468475781241948       1.8276012856046722       1.8974478702116355       1.959065844403893        2.013851941389168
4.9806058470585           -8.80400976372615        0.10038540030078609      1.3190563675594722       1.624920886652683        1.8136429523567938       1.9538922817468207       2.0608357657548724       2.146482444292949        2.2184959508390794       2.2807834120459765       2.335757343914053        2.3846705665303687
5.128329538185654         -8.954727835794916       0.10014839257831569      0.9062251583964503       1.2338253485973698       1.4397348553612181       1.5933217903078927       1.7111517101603553       1.8058224452548164       1.885500887426271        1.9544280068036577       2.0152541560020922       2.069359121870836
3.6166030229975954        -8.076416350282544       0.10050405995318401      1.3190662954697903       1.6255108909363276       1.8165034313777408       1.960738212031474        2.0730153263043847       2.1652430974624126       2.2450518146945417       2.3162924220152794       2.3812622431351285       2.4410112388038954
3.5153611094299486        -7.968074304886212       0.10013643528031611      0.876918203727053        1.205648316536015        1.4151280857390411       1.5741325077121162       1.6989380834258172       1.8020483220389922       1.8916030303897868       1.9717668918703992       2.0450409711554323       2.1125553624577234
3.5325658022696578        -6.222261078825642       0.10017393885623004      0.29660685917329416      0.34198137596301736      0.38006557535183344      0.42374304380714545      0.4723299427241781       0.5244665081590704       0.5785645179455399       0.6331609277312521       0.6871896912978362       0.7401097810561601
3.547327914798839         -6.30807963097833        0.10007047478285025      0.25587955999305595      0.3041504260060765       0.34637285254436295      0.3950239686044283       0.44870311487403597      0.5058053854664336       0.5646247018330005       0.6236790788364868       0.6819122898536069       0.7388075972229383
-0.38339697697030184      -5.076416350269217       0.10036301581804234      1.319058529190876        1.624935361483922        1.813751884565484        1.9544520259040612       2.062647707503761        2.150822168834099        2.2270468715345246       2.2954814311192995       2.358642192626023        2.417695563126344
-0.531419122865896        -4.953438268420972       0.10014612427243068      0.791282504159945        1.1186918454388064       1.3274896456907452       1.4843153157167943       1.6065388688327904       1.707111106460994        1.7945872790116726       1.873454721165021        1.9464538251131247       2.0148421031182626
1                         -6                       0.10034977739912412      1.3189683591010803       1.625236153988388        1.8156939432455526       1.9593650576103012       2.071401319863894        2.1639891264651205       2.2449623467723354       2.318239728086633        2.3860887664189194       2.4494249167489897
1.1376210824430615        -6.187190856443891       0.10015276255454075      0.8433556347746861       1.1718356237665863       1.3815174671824162       1.5406305982279063       1.6659056585093281       1.7700791027684029       1.8614894328113538       1.9443771501080744       2.0212206313008463       2.0930136893953937
2.91710306040434          -5.717211525044937       0.10017024235731069      0.29659566721586506      0.34197215139612586      0.38203381849656426      0.43142165511255604      0.4887758639763384       0.5514537650947606       0.616779337628976        0.6825621672052067       0.7473045569976084       0.8103510714782475
2.835283486488792         -5.708446377511082       0.10005672585818538      0.25436157291659317      0.30200310945665954      0.34445344364789005      0.39686404914757784      0.45781075760853446      0.5244851591128857       0.5940378951385794       0.6641256271908031       0.733139630458726        0.8003674851366691
-3.04664120913306         -0.3694334598595939      0.10021876344185654      0.29661384612171005      0.3427137555877187       0.38446311838741426      0.4353273122855253       0.4933491371041445       0.5559383721899576       0.6205879591287086       0.6853249116837574       0.7488279889267944       0.8105475433956512
-3.0707308905716233       -0.42691411976912513     0.10011033257562818      0.2665750130093424       0.31480877999032203      0.35916281816796747      0.4129119655852048       0.47377334316212993      0.5390873661240402       0.6063225056763786       0.6735131182170431       0.7393508511416111       0.80329881429502
-3.0764163501896604       -2.616603023221347       0.10038434341250187      1.3188194153115707       1.624776394578755        1.813877264495632        1.9553678024021608       2.065014661723297        2.1553108531536713       2.2342378448489812       2.305741582841891        2.3720947694460577       2.43422177469615
-2.8356381828117003       -2.6793859468724235      0.1000806576055958       0.7125188270626059       1.0372856655034022       1.2472322202523916       1.4057500601125537       1.530473032649111        1.6341943456775012       1.7253898172486701       1.8084113520944807       1.8858135189461858       1.9586133893314002
-3.2930288125578806       -2.292757651065295       0.1003886966440795       1.3190706110475932       1.625150883491239        1.8150716533347142       1.95803182745498         2.0693910481839786       2.161314651316774        2.241541838131838        2.31389214789241         2.3805905795794136       2.4425974787877296
-3.1687986424974057       -2.444028504970044       0.1004998295318064       1.319173045732092        1.6250911473256993       1.8144939840752314       1.9566308853481653       2.0671240244431512       2.1582990393289725       2.237999321505333        2.310084132127273        2.376783721637705        2.43903058695781
-3.081863516677525        -2.333699471745709       0.10014878200042683      0.8920649381893437       1.219977280951949        1.4272147891552731       1.5835881803514134       1.7061809002220074       1.8078937622039555       1.897047694647298        1.9777928447598536       2.052553751765455        2.1223498613156493
-2.9591670382283075       -2.471052404743938       0.10008274567895734      0.8066699417406811       1.1343819931067738       1.3432972430115673       1.5009202540474171       1.6246814061982258       1.72749553516082         1.8177732716581991       1.8997499215097966       1.9759014370205839       2.047243358058527
-3.4443473028616385       -2.168585494375481       0.10038360014425411      1.3191279192317495       1.625387327908922        1.8159126490691908       1.9596531154490264       2.071665626246889        2.1639771633775107       2.2442675280667572       2.316371208022267        2.3825518688000153       2.443821148117022
-3.414785883557473        -1.9884747090149946      0.10015544045666191      0.8038489252251512       1.132201614710838        1.3432515529964242       1.503763125357717        1.6302651239216177       1.7351852445137033       1.8266625242290828       1.9088831436489853       1.984370195580982        2.0542649643224986
-3.532565802246845        0.22226107885977722      0.10016950509785705      0.2966065047640811       0.3419808853701886       0.3800651145417204       0.42374257730698645      0.4723294687987933       0.5244661739283363       0.5785647973723941       0.6331632821574277       0.6871973500466719       0.7401292102222599
-3.605957781760221        0.233157750052503        0.10006959330867064      0.2536677176961966       0.3010485744152231       0.34059282514196293      0.3858895160630778       0.4364727756289866       0.49094828026626885      0.5476419583588851       0.6049839296351797       0.6618224414174628       0.7175657746011722
-8                        2.1600000000000126       0.10000000000000005      0.10000000065503221      0.10000146269164371      0.10006751622115995      0.10046549523578836      0.10166292433877222      0.10411240856191084      0.10812766147921521      0.11377564007477853      0.12096684832732957      0.12945610424908807
-7.805887260176596        2.0400031937243415       0.10000000000000009      0.10000000161761279      0.1000025430914433       0.10009694396127801      0.10062611760595634      0.10214442355996782      0.10515620180658179      0.10999806849170281      0.1167271746952341       0.1252311574524149       0.13523213729121397
8                         -10.800000000000018      0.09999999999999999      0.1000000000416631       0.10000020949497775      0.10001622604242592      0.1001369752099962       0.10057177094123164      0.10160678276668515      0.1035130048899019       0.10647386462682662      0.11056803519786622      0.11573529515476196
7.807029590971053         -10.918816426528473      0.09999999999999999      0.10000000007415195      0.10000029135341937      0.10002000631599557      0.10016298759524199      0.10066556883611188      0.10184497391661028      0.10400130495279751      0.10734096297261353      0.11195690622842598      0.11779008330261041
4.923583649734446         -8.616603023038522       0.10036199955355483      1.3190585370396022       1.6249283119264786       1.8136639156413144       1.9539664383636153       2.061025609644137        2.146857352093124        2.219124621386609        2.2817306544983214       2.337085958168573        2.3864444631892034
5.125335507083231         -8.696654197249549       0.10013694526189477      0.8115125891934954       1.13925948972633         1.3475255844281564       1.5032678675742366       1.6232520842416098       1.7199436177397118       1.8014933979095142       1.8721759379587566       1.9346799108600712       1.9904095213196606
3.8040097637365244        -8.019394152939425       0.10036903084295738      1.3190032220394836       1.6255054342603366       1.816561518491843        1.9607896625661043       2.07285172762134         2.1645795375358254       2.2435815647258073       2.3137583657614496       2.3774803571406435       2.435879831532504
3.650109131873321         -7.89349593124237        0.10014178204650588      0.8243181877960549       1.153059277787925        1.3641358301894897       1.5246042046995798       1.65068772128888         1.7547373934477488       1.844870897828909        1.9253226334201583       1.9986793274744115       2.0661461099024927
3.5694922246735947        -6.153217152779174       0.10019282317967078      0.2965955201657379       0.3412652630299305       0.37721436850216167      0.41816852976531527      0.46422337621115195      0.5141997401708577       0.5665379386303789       0.6197032291966619       0.672550856123748        0.7244772690006455
3.604132521136209         -6.232965739331832       0.1000734754976799       0.254611673428178        0.3019621197943094       0.34147771630631074      0.3867416709956744       0.43728334228310856      0.49170942260738754      0.5483474911479761       0.6056290497028544       0.6624025582884087       0.7180744405671864
-0.19599023619224742      -5.019394152925189       0.10039548472246895      1.3190620359408707       1.6249266169253116       1.8136876543957081       1.9541796642062639       2.061924555236882        2.149403710884313        2.2247435826793764       2.292207051596243        2.354407491693592        2.4125798949104373
-0.2964341238478891       -4.8760087725241785      0.10015177027999862      0.8191770193086679       1.1470127221237345       1.3551806869937633       1.5111076626088986       1.631990432546732        1.730859972790283        1.816387039376692        1.8932157881903338       1.9642256420793471       2.030769607932978
0.9806058470944257        -5.804009763905893       0.1003725553960476       1.3190046433893678       1.6252164114816385       1.815512483294841        1.9589802605794047       2.0708448857446435       2.163303353737756        2.244180889761393        2.317381319412856        2.385165356355912        2.4484556281051173
1.1633592549075766        -5.90913598657124        0.10013242430497087      0.8080453029334604       1.1363529494886742       1.347000372149093        1.5070760851822878       1.6333178458749635       1.7383941517022732       1.8306413571351612       1.9143275027138988       1.9919568518991013       2.06453621788798
2.977611401952914         -5.6675194570224425      0.10021026791893843      0.29660243649013623      0.3422052812219802       0.3828353818428118       0.4327543236865281       0.49035754988469354      0.5529936335789222       0.6180356537565926       0.6833746463390634       0.7475838810780421       0.8100545418228465
2.9236211350142005        -5.63037981932159        0.10005414188189705      0.25742722638905086      0.30507579245477906      0.3477524799620517       0.40035689933498847      0.4612259230226297       0.5275159683584275       0.5964152462054387       0.6656663831200373       0.7337412264355452       0.7999851945989515
3.046641209238082         -5.630566540096809       0.10016056955158932      0.29661348545671057      0.3427140047792612       0.384463977147281        0.43532866537691295      0.4933508048825011       0.5559402200582599       0.6205898367704304       0.6853264978987342       0.7488285796954622       0.8105456047109458
2.9716519136714634        -5.589725795995735       0.10005903000144177      0.25290510636034097      0.3010526526778243       0.344709626717045        0.3982894557781546       0.459870791991645        0.5266077613966377       0.5957354988274742       0.665067879628757        0.7331366353201255       0.7993245005456994
-2.9776114019286273       -0.3324805429613129      0.10018717769182643      0.2966029032615962       0.3422052445636155       0.38283540931420307      0.43275447641552045      0.4903577843633344       0.5529939297822224       0.6180360935015917       0.6833756365855992       0.7475864424419569       0.810060922346333
-2.990914844184906        -0.411049621144223       0.10008146508022155      0.25764894429312574      0.3057054332421831       0.34931638303377066      0.40272398530282466      0.46396134105035963      0.5302245123036382       0.5987956877297697       0.6675312116841027       0.7349935582979948       0.800581504563954
-3.232861626020042        -2.1352296564456084      0.10014573025533902      0.8353729768090133       1.163734254220066        1.3732455544941595       1.532124782558457        1.6572094282424439       1.7611284642675498       1.8520777583362944       1.9341920768761136       2.0099205181957944       2.080331210526587
-3.482896939593787        0.2827884749569355       0.10017361959766473      0.296629907238558        0.34283846993722283      0.38333066287064893      0.43005261436287223      0.48151055796311676      0.5361462021280092       0.592328083309082        0.648658566358971        0.704149614004777        0.7583286110674303
-3.55149203582348         0.3086137741748818       0.10007545223289026      0.25391503191672843      0.30225076633349013      0.3445302958345567       0.393242650754757        0.4469986134407207       0.5041924846277549       0.5631156677511875       0.6222833927072108       0.6806382583089677       0.7376653031365099
-8                        2.400000000000013        0.10000000000000009      0.10000000096383897      0.10000192437280862      0.10008249476137647      0.10055202304163251      0.10192802651542154      0.10468297335794725      0.10912418737690395      0.11528451710345163      0.12303533140718846      0.13209472532505886
-7.805994020655665        2.279982852994394        0.10000000000000021      0.10000000257482804      0.10000352836419198      0.10012294263846284      0.10076526345110008      0.1025503442061204       0.10600243820338569      0.11144393723297165      0.11888364006615403      0.1281560187488625       0.1389349283365453
8                         -10.56000000000002       0.10000000000000002      0.10000000009796843      0.10000038343515087      0.10002532793983461      0.10020106311874226      0.10080002376812873      0.10215965726657024      0.10457403855306668      0.10820686224340724      0.11309826512456549      0.1191373650677779
7.806318949270452         -10.679825854833746      0.10000000000000005      0.10000000018896615      0.10000056374044419      0.10003241229490899      0.10024647627873105      0.10095449969901378      0.10253212533798195      0.10530453088017665      0.1094541647994975       0.11502910242875979      0.12191229062373123
4.831201357423019         -8.444028504851078       0.10043989315238695      1.318876193062179        1.624785830039509        1.8135808138188863       1.9540199258388238       2.0613212955142064       2.1474949694219836       2.2201929556128657       2.2833108440771825       2.3392570009865112       2.389288209784021
5.025013802776038         -8.443177163491528       0.10012734572618727      0.8093658186994501       1.1369723760022117       1.3452814490273672       1.5011494404996897       1.6213822341032962       1.7184375152301463       1.8004566026197788       1.8717066612903468       1.934874146663608        1.991366128769403
4                         -8                       0.10038101398818298      1.3188972265664907       1.6252644946414658       1.8159446418104865       1.959634578973343        2.071012673213017        2.1618608803197006       2.2397568848588016       2.3086176695952583       2.3708578368826623       2.4276766529595477
3.907189242923377         -7.83532340735674        0.10014051649157552      0.8045012381798359       1.1329915664043495       1.3442493022806976       1.504731403463403        1.6305949273194074       1.7340625240940126       1.823211163031749        1.902333461740924        1.9741091819142162       2.0398512152267263
3.5922575698113675        -6.078319850138262       0.10019270852382381      0.29657938582150506      0.3407919570865419       0.37528770307658654      0.4143635300722303       0.4586806948125968       0.5071896420227305       0.5583480540523896       0.6105665548879936       0.6626418030686829       0.7139249862841038
3.6295882904844206        -6.146485337209458       0.10009666932794262      0.26186039388959775      0.30820428488644197      0.3452220931176228       0.3873384478779605       0.4348848167062006       0.4866657135371554       0.5410490656373919       0.5964028470098225       0.6515025805305773       0.7056957481658226
3.1216039055413223        -5.607757661166434       0.10016287510760234      0.2966353164656242       0.3433829232222182       0.38650015850233277      0.43842361430274457      0.4968164006713513       0.5592106039121965       0.6232727925597578       0.6872009901598525       0.7497982668897455       0.8105759477138185
3.070391857525587         -5.5481642335435355      0.10006353280265223      0.25263288123130573      0.30163000430649983      0.34708041187348654      0.4021233642478241       0.4643532214337904       0.5310503314173166       0.5996452860727731       0.6681545950394598       0.735261219258772        0.8004269049776456
0                         -5                       0.10054057684102145      1.3190355652763925       1.624874111397603        1.8136223491426062       1.954048543940454        2.061642175842071        2.148877044021609        2.2238974713198845       2.2910055427953804       2.3528524267353856       2.4106999183707067
-0.04448158490717741      -4.875093238435787       0.10015196120466947      0.9156702592010936       1.2431406888560648       1.4488075385035046       1.6023816109063609       1.7207813671918282       1.8171484548846706       1.9001926574790047       1.9745900876766125       2.0432493626870536       2.1075535564201027
0.9235836497845218        -5.616603023159152       0.10054773199286841      1.319104874180215        1.625162305654438        1.8150610835101213       1.9579931324710982       2.069365486386888        2.1614095429740323       2.241937522428997        2.3148207103921576       2.3823027486295514       2.445317601505642
1.0993221199652699        -5.647036183328736       0.10014226063937016      0.8392047878508267       1.1675131232570048       1.376927434486312        1.5357116774418413       1.6607405616215452       1.76475600753368         1.856073519930595        1.9389067322777505       2.0157264122883256       2.0875479100483645
-2.9171030604114723       -0.2827884749621964      0.10017510674026169      0.29659735414585214      0.34197366455313666      0.38203507126636754      0.43142264236589223      0.4887765775218209       0.5514542748159238       0.6167798622726461       0.6825633848240377       0.7473080271214292       0.8103601064151393
-2.913197993371127        -0.3674086334027734      0.1000766907993803       0.25482525750825774      0.3025482148348948       0.34529617417769526      0.39802810508260067      0.45909761392195475      0.5256449531204738       0.594839125758048        0.6644045978337898       0.7328000958063677       0.7993650087690084
-3.4223885980695474       0.33248054296253354      0.10016809636375205      0.29664793336923345      0.34363926264227534      0.3863176124420209       0.4358347379584645       0.49002245938190664      0.5471264027178523       0.6054466124795425       0.6636155697516488       0.7206946100430334       0.7762623461968596
-3.4865065510003364       0.3707672206850524       0.10007168085060099      0.25348417922404826      0.3028072781975491       0.34772882501871133      0.39972355809110954      0.45660732562343737      0.516569713296872        0.5778468214794256       0.639008319532103        0.6990667824727838       0.7575712494110584
-8                        2.640000000000013        0.10000000000000013      0.10000000124822521      0.10000231339690012      0.10009436220622618      0.10061877712751037      0.10212850825881925      0.10510794790547545      0.10985760277831101      0.1163847840868945       0.12453279520684692      0.13399455934681867
-7.8060789320331665       2.5199372708311203       0.10000000000000031      0.10000000359367285      0.10000446605835504      0.10014586296781879      0.10088384753642514      0.10288781084179709      0.10669305670009634      0.11260700804492131      0.12059922179547512      0.13046302195509543      0.14183680889807904
8                         -10.320000000000022      0.10000000000000002      0.10000000020699062      0.10000065036429921      0.10003732867106023      0.10028053548517256      0.10107008839866365      0.1027899039292166       0.10574835892060493      0.11008001852484334      0.11578025694244164      0.1226862803404824
7.806214849570645         -10.43983229929859       0.10000000000000005      0.10000000043309483      0.10000101117730874      0.10004962415820236      0.10035460413568005      0.10130982115329602      0.10334370910167807      0.10679541608470489      0.11181070567693836      0.11838353752939566      0.1263354852569031
4.706971187392638         -8.292757651015833       0.10048918293123314      1.3190420297013237       1.6249274210451599       1.8137995464576229       1.9544851320979044       2.0621996741810213       2.148917611476577        2.2222631013671643       2.286121770251188        2.3429013480993204       2.393862673687802
4.921252409579447         -8.281001068114303       0.10008883686877557      0.8040401421213402       1.131649266924694        1.3401254234881501       1.4962663124141584       1.6169009330761543       1.714463587095272        1.797076717881229        1.868999811476598        1.9329191538618569       1.990246220994543
4.555652697144229         -8.168585494379402       0.10044118058806764      1.3192126349351179       1.6250763802702715       1.8141382860317548       1.9552825498827593       2.06366055625268         2.1511791535912748       2.2254251794226176       2.2902798705301186       2.348155497578887        2.4003158846414325
4.771578081559661         -8.164767592232215       0.1001233094789203       0.8848480251380925       1.2127667965887425       1.4194839002428414       1.5741816765780223       1.6935324955481932       1.7900782909089294       1.8719422291396468       1.943349565976735        2.0069546732344947       2.0641527748475856
4.3830428820684           -8.076269438365964       0.10039908839911364      1.3190078359470663       1.6250105626258389       1.8144856361369817       1.956374571808851        2.065684007778733        2.1542477609532704       2.229625769531311        2.295707667225518        2.35491514104938         2.408508420157874
4.57509147329031          -8.019338334346628       0.10019774073506352      0.8854822918865619       1.2134217159460505       1.4204441130354686       1.5758086650594672       1.6960809208496699       1.7937134838446027       1.8767845996824692       1.9495180281887978       2.0145757952136987       2.0733552795468375
4.195799625594508         -8.019356075521268       0.10042931406243456      1.3191559575408915       1.6252704484256044       1.8153120667189648       1.958107902981985        2.068478318901198        2.158202387725244        2.234834819305851        2.302281861774223        2.3629708492040358       2.4181430801907644
4.147305240020919         -7.8771387632501195      0.1002067505203478       0.8972675184233095       1.2254642560619178       1.433516391441228        1.5907071522132215       1.713162018990877        1.8132256670302394       1.8989617893861996       1.9746252109152604       2.0428866134385277       2.105101960629093
3.5999999999999996        -6                       0.10017143822099854      0.29656985630496663      0.3406246753965392       0.37460449111436794      0.4130076552020392       0.45670333063104346      0.504689685483471        0.5554304781779654       0.607316042081876        0.6591214831463099       0.7101816534920043
3.652018447880579         -6.062652026822563       0.1000843226150038       0.26040519823544056      0.30641387975887696      0.3422315004474093       0.38279030994611896      0.42891951018317076      0.4795327339241148       0.5330079534297519       0.5876605457695204       0.6422112847840542       0.6959663025002345
3.2                       -5.6                     0.10017298872721457      0.2966428797189554       0.3439785693487165       0.38824302957989665      0.44089988532392277      0.4993135480254102       0.561178239626549        0.6243568364530087       0.6872228024906011       0.748700921044521        0.8083563634395233
3.1682838519325545        -5.5341648933012175      0.10006698312833041      0.25442226360072745      0.3041701780420121       0.3511390791314044       0.4072032325292109       0.4695660881568276       0.5356998292609529       0.6032722118305315       0.6705166036522404       0.7362685743699897       0.8000603239499648
0.1957996254194227        -5.019356075486308       0.10042213066422316      1.3187909571895624       1.6247226891105437       1.8135128247520782       1.9540241025468008       2.0617811241866977       2.149268697788451        2.2246150797403303       2.2920838389766187       2.3542887165785884       2.4124648751176774
0.14042861672597684       -4.859996577798034       0.10008665404871973      0.8546078686915256       1.1826014646092613       1.3899281390659424       1.544984625225096        1.6648408664472538       1.7625833049728696       1.8469228441601826       1.9225520294075726       1.9923938906784717       2.0578348050493855
0.8312013574851066        -5.4440285049438994      0.1003942892496119       1.3190548251422127       1.6250247131845974       1.8144901803262123       1.9567427252521126       2.0673737203089613       2.158686247736474        2.238510829535775        2.310713040674515        2.3775404684189128       2.4399529793830186
1.02601133750301          -5.527259333276568       0.10017242869262948      0.9048355535224586       1.2327417041085866       1.4400290682421182       1.5967079497819558       1.7196627526219708       1.8217534169553204       1.9112976399580002       1.9924672934859131       2.0677027277594524       2.1380229990498387
-2.867434197779552        -0.22226107889927504     0.10016679573160041      0.29659813919325945      0.3420221875517204       0.3821057560540318       0.4314459207086705       0.4887937241097593       0.5515731753509125       0.6171241154621311       0.6832298033694687       0.7483591704875472       0.8118276273549869
-2.846667675475238        -0.30788883023879327     0.10007218180849044      0.2533766619549898       0.30104117930129387      0.34353295720143767      0.3960227591668179       0.45705652643762723      0.5238032097011661       0.5934041559041705       0.6635189144299956       0.7325454342842067       0.7997798404579005
-3.353358790773868        0.3694334598982297       0.10017379206540203      0.2966665239288949       0.3441820319840313       0.3883622396084902       0.4399400687978983       0.49631666876539543      0.5555493106917281       0.6158329487540967       0.6757749133933584       0.7344411466617962       0.7914359048763598
-3.408704072479029        0.41955087667562246      0.10007331382287014      0.253494311433689        0.30358663433918626      0.3505575146484024       0.405194233895756        0.4647466337690334       0.527206482715476        0.5907183962981629       0.6538530333708296       0.7156500600599536       0.7756987069522879
-8                        2.880000000000013        0.10000000000000016      0.10000000142131542      0.10000253757619841      0.10010094844210564      0.10065522503978475      0.1022366498618991       0.1053350795376758       0.11024675151755771      0.11696531864847569      0.12531944363053263      0.13498927732372215
-7.806103683682981        2.759872637385167        0.10000000000000046      0.10000000439452288      0.10000514931351571      0.10016172198457486      0.10096402350437096      0.10311216900200808      0.10714649547993661      0.11336324231179158      0.1217063958623107       0.13194327717122287      0.14369067533983518
8                         -10.08000000000002       0.10000000000000007      0.10000000039053496      0.1000010175181361       0.10005179828313555      0.10037130246313715      0.10136608003172369      0.10345869701723116      0.10696297426751544      0.1119784094569561       0.11845365182020513      0.12617683228866322
7.806101111292911         -10.199853165840683      0.1000000000000001       0.10000000088614856      0.10000167272259146      0.10007155453119919      0.10048408089455609      0.10171602333691106      0.1042389628987515       0.10839437836592895      0.11428248297284017      0.1218389451740801       0.1308257012433334
4.37603204863087          -7.90634447763505        0.10015356431265048      0.8341432827975482       1.1623236996986461       1.371228372374368        1.5287696271757143       1.651403382128538        1.751419086106541        1.8368595213170826       1.9119827295814729       1.979484336453848        2.0407659780801595
3.5922423388324822        -5.921603905535902       0.1001604447843419       0.2965809450112464       0.34079353326040096      0.3752894707895669       0.41436573384989495      0.4586833128175431       0.50719263502601         0.55835145926767         0.6105706854989793       0.6626474607727075       0.7139338529854554
3.666200489541151         -5.970589609981673       0.10006529644805441      0.25421383722610386      0.3003811217980316       0.33620437623558375      0.37674525751661486      0.422939211087278        0.4737078921284112       0.527416580555515        0.5823564976973933       0.6372273383331386       0.6913213866573534
3.3532171528173156        -5.6305077753422195      0.10017452548324213      0.2966583463911849       0.3441749288807213       0.3883565358322049       0.43993697807268545      0.4963169283784652       0.5555533287689445       0.6158408235765029       0.6757864910299194       0.7344560500008277       0.7914534867451299
3.4222610788544077        -5.667434197749566       0.10018880013229954      0.296652711542319        0.3436438273956886       0.3863245758975571       0.4358456781226358       0.4900375499510734       0.5471453914489202       0.605469048078845        0.6636409458848873       0.7207223610840257       0.776291730560208
3.4292396798419613        -5.605110151953109       0.10008466140282764      0.26033936312616335      0.3098275714811007       0.35565384036335806      0.40888275865190254      0.4669756952363412       0.5280113125248189       0.5901813009692146       0.6520671845137347       0.712706773878928        0.7716788198457355
3.278319850193622         -5.607742430199685       0.10018993203993572      0.29667292236091364      0.3443082016622611       0.38902113810015954      0.44164875082215144      0.4994436612592002       0.5602792932332827       0.6222026325383          0.6837319870127417       0.7438858270311564       0.8022630853234446
3.259425391586399         -5.549615897975864       0.1000920224676688       0.2617107455262642       0.3115462831797688       0.35878034472020276      0.41450393130141255      0.4757744052476445       0.5402865131184137       0.6059381209660945       0.6711470993528974       0.7348705175116531       0.7966876756575973
3.3514637785433727        -5.558346280983262       0.1000680295820409       0.25444985032637985      0.30476090755814894      0.35244248748846974      0.4081525561671924       0.4689416975014881       0.5326754287279841       0.5974119430324786       0.6616831556418896       0.724514543471377        0.7855030184263252
0.38304288196341046       -5.076269438322426       0.10040328050803692      1.3189486310271237       1.624848896229753        1.8136811230080634       1.9543901185709738       2.0625912735046272       2.1507684945974543       2.2269941408403118       2.2954285606241216       2.3585887095490286       2.4176412857988456
0.38487776349531294       -4.868724024898201       0.10008578695523593      0.7412973739117962       1.0672792288853057       1.2767417596948294       1.4341366416588561       1.556799701192363        1.657544191958463        1.7449506626068418       1.823629285440582        1.8964400135491355       1.964717884446634
0.5556526971324366        -5.168585494371522       0.10036123879741712      1.3190386350245935       1.6249315226417445       1.813860247196692        1.954926634836607        2.0638246536019413       2.153010046193388        2.230468956334094        2.3002307875115644       2.364692999520621        2.4249383488385834
0.5492928239881533        -4.961617578261494       0.10012726145579719      0.7891192696219037       1.1164206419472178       1.3252519240963758       1.4821468539964133       1.604488631107712        1.705214900012235        1.7928675017008822       1.8719190451126801       1.945097412216653        2.013651686356407
0.7069711874417617        -5.292757651064937       0.1003603466352837       1.3190110291439192       1.6249362230615148       1.8140748324913194       1.9556734182638762       2.06543266393987         2.15574146969931         2.2344945372971394       2.305611254965303        2.37139041729456         2.4328413447606834
0.923594473864346         -5.295953133531836       0.10015037845640985      0.8218625026706746       1.1498385460284795       1.3586814772626505       1.5164344667502148       1.640394888002179        1.7433903505100512       1.833744159992743        1.9156478789817297       1.9915770056097661       2.0625983704052904
0.7562390614169778        -5.11008023390265        0.10014733360320761      0.8057249008142356       1.1334228251157699       1.3421882064642532       1.4994205187362726       1.6225426622329457       1.7244591815503048       1.8135880459888283       1.8942235618676266       1.968934997345378        2.0388643052382722
-2.830507775364901        -0.1532171528720119      0.10018077135042527      0.29660589327143094      0.342247004281645        0.3827353700022145       0.43235920945960854      0.4898767804691834       0.5528045690315807       0.6185356304521611       0.6848637108401168       0.7502507306115394       0.8139949788696613
-2.7918200453627953       -0.23153521316709064     0.100071124326586        0.25303729225640575      0.30090534023522997      0.3437288856267076       0.3964295786882635       0.45761287100574716      0.5245445478065255       0.5944109361063558       0.6648663772709789       0.7342876487713071       0.8019440366650322
-3.278396094533758        0.39224233881856         0.10017373912534411      0.29666744680944984      0.3443030616617646       0.38901573159580366      0.44164263705161555      0.4994366352882182       0.5602712548651805       0.6221935923151747       0.6837220798484573       0.7438753510633573       0.802252638861075
-3.320108145438017        0.44967501453062186      0.10007047155791447      0.25528062536946794      0.30559104954120025      0.35340239831570047      0.4094257481831192       0.47066568394600067      0.5349219638180188       0.6001984933783552       0.6649937435956538       0.7283151946310552       0.7897578280922652
-8                        3.1200000000000134       0.10000000000000013      0.10000000142155883      0.10000253779205785      0.10010095102255945      0.10065523303760825      0.10223666389377532      0.10533509828900865      0.11024677307608317      0.11696534161095497      0.12531946722170098      0.13498930121054867
-7.806058321758834        2.999819315606898        0.10000000000000049      0.10000000470404669      0.10000540265463008      0.10016744087290048      0.1009925814311532       0.10319137840996785      0.10730554342712338      0.11362717003889379      0.12209133360750447      0.13245643157217615      0.14433197427964772
8                         -9.840000000000018       0.10000000000000013      0.10000000065442731      0.10000146274591575      0.10006751630972809      0.10046547147380065      0.10166268803413246      0.10411107091884338      0.10812273394973732      0.11376075021248326      0.1209296418445457       0.1293747578338577
7.806151843035377         -9.959968099253844       0.1000000000000003       0.10000000160719556      0.10000253852764938      0.10009684697864125      0.10062559116218782      0.10214264932577204      0.10515112995838859      0.10998509323159945      0.11669578108620603      0.12516194759552848      0.13509201580253458
3.4827884749706994        -5.717103060419972       0.10017940351507089      0.29662371932884685      0.3428329954193068       0.38332810490925656      0.4300547670805604       0.48151765688463877      0.536158000821485        0.5923441101497106       0.648678278359013        0.7041723852820796       0.7583535971503409
3.532480542989239         -5.777611401970379       0.10025157885938885      0.2966113294935221       0.341986162050616        0.3800737131485276       0.42375602130418794      0.4723475183973848       0.5244881494189425       0.5785899145679188       0.6331908009742082       0.6872265041732956       0.7401589684082556
3.5653640525757813        -5.73553704629046        0.10007636415601033      0.2635665812467173       0.31098720655933326      0.3513776207833668       0.3977779768776475       0.44927146893602876      0.5043824930938487       0.561442216658782        0.6189417272047062       0.6757895184302618       0.7314389599207725
3.569433459918105         -5.846641209274012       0.10016704872949907      0.2965868709005261       0.34125819121940976      0.3772105339078308       0.4181691477889471       0.46422835065100077      0.5142087288046383       0.5665506866053611       0.6197200932040042       0.6725732645154402       0.7245085256839623
3.651830784058766         -5.869901138769292       0.1000639497287763       0.2525076255442633       0.29907719583029907      0.33607317947984394      0.37812595789771525      0.4257339593409975       0.477715767487296        0.5324211944766376       0.5881819986610052       0.6437420285137364       0.6984281604593953
3.603628194700345         -5.774360859289935       0.10006373950659926      0.25692512968728703      0.3041232600112011       0.34335133248939664      0.3882613824416288       0.43844796216208787      0.4925379912824767       0.5488665570762846       0.6058642384645864       0.6623775047874104       0.7178119384876044
3.507652106140712         -5.6544918827504915      0.10006449378390243      0.25683150390540904      0.30564763412074764      0.3494206624563108       0.4000058885824198       0.455508164862837        0.5142008099745426       0.5743493269618875       0.6345112133918834       0.6936788581428065       0.7513803611318944
-2.807742430227278        -0.07831985033181595     0.10017989859333908      0.2966012679026679       0.3424717292737675       0.38341054143972075      0.433376340665794        0.49109295868313685      0.5541549631958175       0.6200088549723376       0.6864701282550887       0.7520057387168644       0.8159064963033389
-2.7658800108675963       -0.1411827900655403      0.10008843016179295      0.26034888587865285      0.3081983219807016       0.3511499127294053       0.4036992871621444       0.46446381339553267      0.5308550660810246       0.6001598396001935       0.6700784190004065       0.7390039469240532       0.8061986288420773
-2.8675194569967          0.22238859800859986      0.10016903399816371      0.2965985541189577       0.342022413383186        0.38210590455994076      0.4314460480258105       0.4887937983915797       0.5515730579531425       0.6171236219428633       0.6832287766969861       0.7483575019419308       0.8118252602775791
-2.8305665400604973       0.15335879067444333      0.10017849652509214      0.2966093007913585       0.34225011315412746      0.3827382347791886       0.4323617659053509       0.4898790193795765       0.5528064174307987       0.6185369833261085       0.6848644773162095       0.7502508491531666       0.8139944212982329
-2.782106393133907        0.2064288161100183       0.10007167162599433      0.2548269012169693       0.3027057839925064       0.34557927627131363      0.39825254055602993      0.4593386143467257       0.5261454036025573       0.5958867848333487       0.6662280602678382       0.7355487111234905       0.8031146333629794
-3.2                      0.4                      0.10017350268330512      0.29665033284291115      0.3439843361871686       0.38824810856613284      0.44090461033384876      0.4993180662819643       0.5611825557364675       0.6243609279517081       0.687226743651941        0.7487049862968588       0.8083612461341391
-3.2283014103835286       0.4640160263967854       0.10006758124396209      0.2555870177440284       0.30565545788006343      0.3532156673444615       0.40952544256083506      0.47163720125310565      0.5371533217556724       0.6038857947249475       0.6701895434891719       0.734982115779511        0.7978296723812063
-2.917211525032547        0.28289693958327367      0.10016930869292383      0.29659978996720004      0.3419758919982997       0.3820378008923605       0.4314259075998604       0.4887800223753679       0.5514574861182717       0.6167824618755295       0.6825651040490721       0.7473087050528912       0.810359663573613
-2.8291703796015035       0.28653148484894625      0.10007104797969378      0.25339255438121994      0.30108444864109657      0.34360687422634223      0.3960987129075388       0.45713822495520734      0.5239188484667475       0.5935898189780956       0.663804117204435        0.7329498989042006       0.800313700862966
-8                        3.3600000000000136       0.10000000000000013      0.10000000124779095      0.10000231368476135      0.1000943670734259       0.10061879383826096      0.10212853907621589      0.10510799012680798      0.10985765189220703      0.11638483666697898      0.12453284932440133      0.13399461420873252
-7.8059556296162524       3.239804880214832        0.10000000000000035      0.10000000440248968      0.10000515514273108      0.10016183367333568      0.10096454078374333      0.10311353299153037      0.10714915051813466      0.1133675712596204       0.12171267451454275      0.13195168120427936      0.14370130494390312
8                         -9.60000000000002        0.1000000000000003       0.10000000096909116      0.10000192597913098      0.10008250661275457      0.10055203678970075      0.1019279223773694       0.10468218327759267      0.1091211013537995       0.11527493044707741      0.12301096345499422      0.13204068689046572
7.806116879631485         -9.719948061709156       0.10000000000000053      0.10000000257532086      0.10000352735543892      0.10012290215129753      0.1007650164103401       0.10254945293252977      0.10599969339382902      0.1114364557748272       0.11886454964441003      0.12811233705877878      0.13884402913769855
-2.8000000000000003       0                        0.10024666775258233      0.29661000257592424      0.34257502449470345      0.38370442710708647      0.4338176873543483       0.49161946007555385      0.5547347600645824       0.6206321521546428       0.6871374338279979       0.7527210639442449       0.8166719042451543
-2.741739286449075        -0.04301697777206286     0.1000576324799416       0.25817402784729376      0.30638508033447426      0.34998182093297076      0.40309576636136546      0.46428560405484826      0.5310305611872673       0.600666008983792        0.670913696287489        0.7401727761535571       0.8076994406017617
-2.8077576611491257       0.07839609437208056      0.10017842319597932      0.29660930302772254      0.3424790006075254       0.3834176712293994       0.4333832090578037       0.4910994334626572       0.5541609261829193       0.6200142186012124       0.6864748438771674       0.7520097893978416       0.8159098832923853
-2.7482604942385045       0.016620347037221504     0.10007323320110535      0.2629800440804431       0.3109604014614036       0.3542538626070485       0.40698512793640534      0.46773715309564345      0.5340143671271653       0.6031718559407805       0.6729443780433211       0.7417391855525464       0.8088155622391566
-2.752531517004259        0.11712494270006647      0.10006637482423357      0.25685574313644793      0.3049649711346402       0.34832608156559214      0.4012994212755036       0.46246756744609513      0.5292539596894167       0.5989526634949264       0.6692643494125119       0.738579424878475        0.8061557026638949
-3.1216801498962483       0.3922575698182583       0.10024426879200299      0.29664309982646786      0.34339013453129         0.3865084448100882       0.4384328063514607       0.49682572364200356      0.5592193556429323       0.6232804974608619       0.6872075256813425       0.7498039467560661       0.8105817482396612
-3.125832713951099        0.44739973252208814      0.10007489358286556      0.262133603216651        0.3111033974554807       0.3567778893506975       0.411660257200493        0.4731803592748605       0.5387581784524104       0.6059793516534111       0.6729946952393691       0.7385803755121942       0.8022407650577132
-3.046782847270586        0.3694922246942302       0.10016614044721786      0.2966132363344073       0.34271444490244274      0.38446671246050235      0.43533327867550625      0.4933561491665101       0.5559453315288893       0.62059408275208         0.6853297393657356       0.7488312988447181       0.810549239088498
-3.072198489462547        0.4462130329578035       0.10006274458244595      0.25596777651950403      0.30480576119495123      0.35001913644707366      0.4047690958630891       0.4666732199647264       0.5330297459420573       0.6012823078293411       0.6694552838802227       0.736236396539404        0.8010893912955109
-2.9777389211833873       0.33256580227569316      0.10015707462052824      0.29660050154696266      0.3422037925654353       0.3828360759228589       0.4327570886645873       0.4903614286601019       0.5529977864040991       0.6180395302281796       0.6833782506304859       0.7475880144121007       0.8100613430225865
-2.8918994266668707       0.35471200236609257      0.10007076672219094      0.2527170325755123       0.30045761710775926      0.3431627795849117       0.39590241601512893      0.45708835334521064      0.5238509082045161       0.5933355669669013       0.6632372915359016       0.7319906695527836       0.7989203239231149
-2.972868887810062        0.41526995285093116      0.10006339221188236      0.2507935258634921       0.2990489177096857       0.34288601231944854      0.3966786401114806       0.4584776867472517       0.5254269263139388       0.5947567882001907       0.6642809207510726       0.7325322770154302       0.7988958554130087
-8                        3.600000000000014        0.10000000000000013      0.10000000096122962      0.10000192419989516      0.10008249712157162      0.1005520355001887       0.10192805322107006      0.10468301243447387      0.10912423414372267      0.11528456771924377      0.12303538362472467      0.13209477831625202
-7.805837946137871        3.4798418929615162       0.10000000000000044      0.10000000359772655      0.10000447316558257      0.10014601770941388      0.10088458949856048      0.10288980363410238      0.10669698093236847      0.11261346050669409      0.12060864154514582      0.13047569773788756      0.14185291349661766
8                         -9.36000000000002        0.1000000000000006       0.10000000126212415      0.1000023168156096       0.10009438556694715      0.1006188213967022       0.10212849511547151      0.10510751560837235      0.10985571698414488      0.11637868546659418      0.12451695895462998      0.13395887420261735
7.806030677516574         -9.479920303866601       0.10000000000000127      0.10000000362452073      0.10000447271346267      0.10014592895632034      0.10088407489047256      0.10288823409957874      0.10669323494389786      0.11260537440094569      0.12059146272710879      0.13044057931123818      0.14178433360952766
-8                        3.840000000000014        0.10000000000000013      0.10000000065139798      0.10000146210401546      0.10006751497128712      0.10046549847247437      0.10166293709273162      0.1041124307139588       0.10812768975689785      0.11377567136771467      0.12096688068248146      0.1294561370709256
-7.805747478200595        3.719908101434013        0.10000000000000035      0.10000000256909942      0.10000353270527708      0.10012306470656483      0.10076588327913676      0.10255205895082098      0.10600587821274153      0.11144967072922053      0.11889209913357766      0.12816750142982922      0.13894962526669083
8                         -9.120000000000019       0.10000000000000075      0.10000000143945798      0.10000254156620958      0.10010097386341292      0.10065527468725509      0.10223667211758858      0.10533484819649873      0.11024561254571226      0.11696148146941364      0.12530925451151226      0.13496592005004673
7.805932229872237         -9.23987572476758        0.1000000000000021       0.10000000445734658      0.10000516291413362      0.100161879123484        0.1009646435423529       0.10311364207156526      0.10714891709465313      0.11336593187790463      0.12170676087062081      0.13193576578026425      0.14366496559331712
-8                        4.080000000000013        0.10000000000000009      0.100000000390014        0.10000101751075659      0.10005180229551291      0.10037135813659726      0.10136649505180347      0.1034608674164284       0.10697074451051558      0.11200142943828782      0.11851032531367421      0.12629904372396122
-7.805702403490677        3.959965835354257        0.10000000000000032      0.1000000016096827       0.10000254447519076      0.10009700789157268      0.10062646955965042      0.1021454374940698       0.10515828796563116      0.110001610385922        0.11673247692968357      0.1252384430768547       0.13524156049146954
8                         -8.880000000000017       0.10000000000000046      0.10000000143408559      0.10000254036049523      0.10010096595573263      0.10065525955105735      0.10223667070146121      0.1053349505988358       0.11024606852548151      0.11696293816978637      0.12531298056127857      0.13497418560021415
7.805849140392263         -8.999908088175829       0.10000000000000188      0.10000000476657189      0.10000541607502944      0.10016760463657422      0.10099324966258778      0.10319302104487112      0.10730844958600642      0.11363110577183357      0.12209476259466982      0.13245578827201035      0.14432038199145356
-4.706971187372142        2.292757650995344        0.10035669950581608      1.3190176746874729       1.6249141737466892       1.8137870308467243       1.954473245875188        2.0621880532998094       2.1489078623491418       2.22225876874493         2.2861288004559652       2.3429283657484863       2.3939213283297547
-4.831201357396053        2.444028504810761        0.10036141661866614      1.319037330064008        1.6249189838514213       1.8136977880780074       1.954125708030341        2.0614209860306736       2.14759460191303         2.220300916701302        2.2834389655406673       2.339420694364027        2.3895063339902145
-4.919055641883557        2.2721803704339343       0.10014899332726655      0.7947157781085276       1.1221898489224935       1.3308567811006995       1.4871907289178061       1.6080369812430444       1.7058075560945927       1.7886202129772377       1.860739811699384        1.9248597540997106       1.9823976971392756
-4.555652697101357        2.16858549435075         0.10041842770337579      1.3188702254591569       1.6248246904551598       1.8139274306654818       1.955097488704739        2.063492027947829        2.151022853117523        2.2252803389344527       2.2901484873201357       2.3480424282409738       2.400229318122175
-4.73420782705933         2.087525430129428        0.10012505302085728      0.7977627863175908       1.1252324692611575       1.3340142802806418       1.4907490106883878       1.61224415298925         1.7108485616037805       1.7946360982821077       1.867858992975085        1.9332107265566296       1.9921128198398923
-8                        4.3200000000000145       0.10000000000000005      0.1000000002072594       0.10000065054944261      0.10003733549841813      0.10028062454572993      0.10107075401391456      0.10279335245213224      0.10576056474241036      0.11011563784571031      0.11586671002792608      0.12286999974230023
-7.805696881125463        4.19999829569438         0.10000000000000019      0.10000000088954315      0.10000167632595468      0.10007165306413014      0.10048466863432091      0.10171818830838787      0.10424571025665452      0.10841265020229514      0.11432807280048922      0.12194062657632114      0.13103163809903975
8                         -8.640000000000018       0.1000000000000002       0.10000000125004856      0.10000231397121122      0.10009436619638078      0.1006187845359953       0.1021285043813706       0.10510785553725716      0.10985717919208139      0.11638331396164651      0.12452874805408341      0.13398494634809427
7.805910493381863         -8.759838482283554       0.10000000000000077      0.10000000442415806      0.10000515813659137      0.1001618529702223       0.10096459348993912      0.10311361850748334      0.10714915857352768      0.1133671092551038       0.12171058665374428      0.13194554137080028      0.1436864903042641
-4.923583649743311        2.6166030230598767       0.10037536661321526      1.3190875417846817       1.6249544932070659       1.8136921152603656       1.9539950341700711       2.0610596245197623       2.146905820915182        2.219202328782945        2.2818584936060473       2.337290224447344        2.38675572169639
-5.045441767147007        2.4814080190706695       0.10016286543516965      0.8078279493142403       1.1355099597303313       1.343867352862004        1.4997568896346734       1.6199837679179019       1.7170127990636317       1.7989940818671608       1.8702032484207833       1.933333340047571        1.9897959259815676
-4.383042882078396        2.0762694383701077       0.10044952236217324      1.3189979838323995       1.6250061418703197       1.814488962747774        1.956380796854665        2.0656928227366884       2.1542588973396466       2.229640159781405        2.295728514225186        2.354948830763774        2.408565700756409
-4.578048556368654        1.9707937153441577       0.10008459422459946      0.7753290937937977       1.102461426225319        1.3119550674274894       1.4697243210787698       1.5924917613201843       1.692472703061938        1.7776887749342587       1.8523978428089498       1.9193087005272569       1.979849021038215
-8                        4.560000000000016        0.10000000000000002      0.10000000009820502      0.10000038357464143      0.10002533693019681      0.10020120311723972      0.10080110272880394      0.10216520378323178      0.10459341515825793      0.10826240811887088      0.1132308163010436       0.11941421183549865
-7.805702345496441        4.440006163728173        0.10000000000000007      0.1000000004357093       0.10000101388078976      0.10004971108368642      0.10035519774385455      0.10131234245585928      0.1033525785994338       0.10682113643070597      0.111877025554549        0.11853307044871357      0.12663797050706085
-8                        4.800000000000015        0.09999999999999999      0.10000000004171732      0.10000020953364856      0.1000162389279196       0.10013720605256259      0.10057357072939137      0.10161587899070412      0.10354420334438641      0.10656128980951192      0.11077233642707597      0.11615325122003166
-7.805698347830762        4.6800046331470915       0.10000000000000005      0.10000000019018797      0.10000056544277425      0.10003248655498544      0.10024709576077744      0.1009576179266054       0.10254442026472899      0.10534209938237878      0.10955285864443993      0.11525194753843705      0.12235963841685797
8                         -8.40000000000002        0.10000000000000013      0.10000000095823229      0.10000192318478647      0.10008248688726644      0.10055200464045581      0.10192799307329035      0.10468288514805622      0.10912390449899752      0.11528360330407002      0.12303282485813855      0.13208869547775828
7.806009217795485         -8.519827076403176       0.10000000000000049      0.100000003583582        0.10000446608207585      0.10014588470457982      0.10088396731230713      0.10288813347343702      0.10669362331255215      0.11260767475501683      0.12059933962113566      0.13046109382410823      0.14182984763013495
-4.980605847056986        2.804009763718573        0.10036767109984719      1.319085202791249        1.6249545742738434       1.8136783524753561       1.9539311576704501       2.0608885886017525       2.1465692251820667       2.2186466005027117       2.2810363917038794       2.3361578541178525       2.385268581308808
-5.128107344888453        2.7000364657527878       0.10015669320856697      0.8070484210460024       1.134726971478832        1.3430813692005554       1.4989114500366671       1.6189962834493354       1.7157979555222191       1.7974734315099747       1.8683071363249815       1.930996743217677        1.9869530008116063
-4.195799625602386        2.01935607552284         0.10038859309158868      1.319132396179229        1.6252598400992202       1.8153043246968095       1.9581021110685528       2.0684733888363045       2.158198912847162        2.2348353235003287       2.3022925017431293       2.363002807528391        2.4182146648867686
-4.387483314079607        1.919242663005108        0.10011707531978349      0.8557455583336321       1.1839525940911644       1.3922859631082523       1.549262028385056        1.671318107933302        1.7707870445727754       1.8557204742335889       1.9303699977176325       1.9974250953486765       2.0582884312802148
-8                        5.040000000000014        0.09999999999999999      0.10000000001599647      0.10000010665663343      0.10000987358013007      0.10008938219139625      0.10039486255919071      0.10116747753664941      0.10266231776018923      0.10509979380217781      0.10862490183447356      0.11327068736599215
-7.805687384861431        4.920001512556949        0.09999999999999999      0.1000000000745025       0.10000029230867331      0.10002007153724331      0.10016368254877463      0.10066970138289698      0.10186281685561925      0.10405771673193472      0.10749009457776117      0.1122916060793404       0.11845354960570419
8                         -8.160000000000018       0.10000000000000013      0.10000000064856467      0.10000146102510048      0.10006750404877         0.10046546616001321      0.1016628782689483       0.1041123271679155       0.10812746750420477      0.11377507468556841      0.12096532102591734      0.12945239322907204
7.8060857316259815        -8.279857307935105       0.10000000000000035      0.10000000254946644      0.10000352264781857      0.10012286967967686      0.1007649511372533       0.10254952160998439      0.10600077744635099      0.11144103529853759      0.11887886138376615      0.12814826601416862      0.13892218573264237
-5                        3                        0.10039025881361281      1.3190475925610285       1.6249076092619696       1.8136245149909904       1.9538626778583301       2.0607890270392843       2.146419875725159        2.218429181640186        2.280734558624641        2.335756438689341        2.3847523805156294
-5.159454165041012        2.9419750868209027       0.10014378536167502      0.8229104471408261       1.1508179236201188       1.3588520273465774       1.5143490821872596       1.6340502294402863       1.7304528521651676       1.811725521983781        1.8821524163187073       1.9444274398735792       1.9999573891765434
-4                        2                        0.10037339291738337      1.3189506931634265       1.6253082968643828       1.81598420323537         1.9596711481040592       2.0710479382444498       2.1618977617766886       2.2398015924854          2.3086835089865927       2.370967531343236        2.4278651178663253
-4.13414306171316         1.8460944261572803       0.10015802662108632      0.8211896573917089       1.1495253235822778       1.3596290088056355       1.5187430882574338       1.6431068511297908       1.7449447047638265       1.8323079261601747       1.9094874897547862       1.9791932405913266       2.042805608670991
-8                        5.280000000000015        0.09999999999999999      0.10000000000557956      0.10000005101970609      0.1000057485235758       0.10005621001002267      0.10026444207552339      0.10082721335074736      0.10197338114411507      0.10393334444088165      0.10688340766691333      0.11090635733104116
-7.805680471846213        5.159996836872382        0.09999999999999999      0.10000000002640559      0.10000014101548681      0.10001179652413972      0.10010392218610108      0.10045213012549002      0.10132659901845247      0.10301640108847603      0.1057802286210071       0.10979691199559612      0.11512301824927805
8                         -7.920000000000017       0.10000000000000005      0.10000000038855787      0.10000101683133315      0.10005179472341778      0.10037133474091993      0.10136645200209775      0.10346079577782197      0.10697060478532137      0.11200107432433598      0.11850940268172644      0.1262967978107294
7.806112331525895         -8.039905761966923       0.10000000000000024      0.10000000159758682      0.1000025365813546       0.10009683652622303      0.1006256126859099       0.10214303460293316      0.1051533658179697       0.10999319459346511      0.11671960012379352      0.12522000450936968      0.13521599833646072
-4.9806439244781355       3.195799625597494        0.10053872528998231      1.3191535821957965       1.6249963117470028       1.813719424596106        1.9539700018261785       2.060927806108111        2.146608949135171        2.2186864794286953       2.2810761176589383       2.3361973262116136       2.385307682887925
-5.115996070462508        3.1827916366189086       0.10017204682583547      0.9015612539644968       1.2292771522858545       1.435335901072067        1.5890638328922666       1.7070555788402573       1.801926754265904        1.8818610106554767       1.9511117459796643       2.012338770615335        2.066928743474989
-3.804009764094473        2.0193941528678834       0.10045762478586283      1.3190593280517382       1.6255339808699287       1.816586757858887        1.9608116890821232       2.0728749355243665       2.164610517210297        2.243634383374902        2.313861542350666        2.377680052690373        2.4362423220336256
-3.880824680934529        1.8453396768068095       0.10016699463884371      0.8234924375115292       1.1521737460934214       1.3630572975698139       1.5231922340458792       1.648713933182922        1.7518954796243975       1.8408334165156945       1.919823501290107        1.9915463698392795       2.0573193829301712
-8                        5.5200000000000164       0.09999999999999999      0.10000000000178928      0.10000002343228441      0.10000329407843545      0.1000351484915094       0.10017759939564645      0.10059233602255557      0.1014852054001522       0.10309097059610213      0.10560809263612292      0.10915792088134796
-7.805678228584974        5.399994893593838        0.09999999999999999      0.1000000000085405       0.10000006425065729      0.10000669718375736      0.10006434150954586      0.10030025691753934      0.10093734434900357      0.1022384807004748       0.10447607389485981      0.10786495748932402      0.11251607895656913
8                         -7.6800000000000175      0.10000000000000002      0.10000000020670445      0.10000065024551481      0.10003733171184757      0.10028061201449807      0.10107072974025107      0.10279331137375729      0.10576048571898893      0.11011543797428121      0.11586618388426763      0.12286869056656573
7.8060863630733595        -7.799958734692912       0.10000000000000009      0.10000000088408767      0.10000167182979265      0.10007154170126391      0.1004840804935372       0.10171647521048079      0.10424210464902185      0.10840636282758816      0.11431833276533511      0.1219266042495488       0.1310122379768718
-0.5556526970986869       -0.8314145056510349      0.10045915175684539      1.3189897131620887       1.6248854763393419       1.8138245316107084       1.9548957728875311       2.0637982795378194       2.152986978350507        2.23044830531146         2.3002120329181195       2.364676082885352        2.4249236233632327
-0.70697118739276         -0.7072423489840459      0.10035121533278811      1.3189778540976895       1.6249146258304255       1.8140552856193637       1.955655598955975        2.065415367180289        2.1557244351694616       2.234477829995156        2.3055952187804425       2.371375766772196        2.4328296231346633
-0.7251153529916232       -0.920335387485345       0.1001280595393338       0.7965416470622735       1.124003813140283        1.3328772318245499       1.4901522160854397       1.613267367209005        1.7151166667392197       1.8041320371413347       1.8846344007301028       1.9592180773215786       2.029042587293852
-4.923730561626203        3.3830428820872886       0.10036067316989832      1.3189778872915465       1.6248745147020554       1.813618507290395        1.9539274957728507       2.060994801325834        2.1468425473009276       2.219140155728746        2.2817971549279124       2.3372294259827644       2.386695232987568
-5.115221338503176        3.3211944963223083       0.10013806077942401      0.8241051054528731       1.1519249093076789       1.3599164904461079       1.5154035615383437       1.6351424476131797       1.7316310120046732       1.8130345424243133       1.8836321269924559       1.9461146081585097       2.001888574981337
-3.616603023289068        2.0764163501615474       0.10046265243553346      1.3190788327293153       1.6255152754253306       1.8165007452817876       1.9607331583601786       2.073013684491406        2.1652612728187717       2.245122999770339        2.3164770772642145       2.381650933032654        2.4417250556476198
-3.674732616684499        1.9332611515456697       0.10024554967793009      0.9451364727347864       1.2728546966975267       1.4804036796940787       1.6376875926774859       1.7606839106446526       1.8618858479202074       1.9494256131408954       2.0275140359525268       2.098720439155027        2.1642602742631873
-8                        5.760000000000016        0.09999999999999999      0.10000000000056004      0.1000000113153859       0.10000202833834793      0.10002369131294879      0.10012852015143346      0.10045577962719361      0.10119561016907115      0.10258403003165224      0.10483257123962053      0.10808698772933889
-7.805679379871717        5.640000995585473        0.09999999999999999      0.10000000000257116      0.1000000288189461       0.10000385947891242      0.10004083793483805      0.10020580850632428      0.10068693642164961      0.10172578196341102      0.10360163572630497      0.10655335667776318      0.11073091739889272
-8                        6.000000000000015        0.09999999999999999      0.10000000000028575      0.10000000796320674      0.10000164162501206      0.10002008071617656      0.10011271518177527      0.10041110406982239      0.1010998155437051       0.10241503041331311      0.10457258375817853      0.10772657907869704
-7.805688249603826        5.880015999576872        0.09999999999999999      0.10000000000086774      0.1000000153730366       0.10000261352553817      0.10003002214360064      0.10016090834313884      0.10056507648782032      0.10147215843350842      0.10316407239785973      0.10589162874228619      0.10982517993930264
-8                        6.240000000000016        0.09999999999999999      0.1000000000005609       0.10000001131888721      0.10000202844037602      0.10002369182950548      0.10012852150229         0.10045578201874654      0.1011956133218672       0.10258403239898602      0.1048325686811536       0.10808696990639637
-7.805709540483661        6.120037461265156        0.09999999999999999      0.10000000000086674      0.1000000153726952       0.10000261350789023      0.10003002183934852      0.10016090624144837      0.10056506790996393      0.10147213416497973      0.10316401721958361      0.10589152128621525      0.10982499215591023
-8                        6.480000000000017        0.09999999999999999      0.10000000000180176      0.10000002345084906      0.10000329448099961      0.10003515020854896      0.10017760326351914      0.10059234213156303      0.10148521271397191      0.10309097524964571      0.10560808470120371      0.10915787578443852
-7.8057492732765015       6.3600594154659875       0.09999999999999999      0.10000000000257935      0.1000000288257926       0.10000385937267166      0.10004083582068625      0.10020579636775052      0.10068689443977812      0.10172567529867745      0.10360141117795348      0.10655294241890344      0.11073022092497005
8                         -7.440000000000018       0.10000000000000002      0.10000000009808918      0.10000038351173146      0.10002533600831354      0.10020119951451385      0.10080109444774736      0.10216518725770656      0.10459337848516236      0.10826230534137792      0.11323053042817936      0.1194134734654534
7.806030719903873         -7.560005081553125       0.10000000000000005      0.10000000043387021      0.10000101189273071      0.10004965223976216      0.10035486413072127      0.10131132202151172      0.10335035295538096      0.10681714790821963      0.11187071672914896      0.11852384572774928      0.1266250734513663
3.804200374485309         -3.9806439244946694      0.10033977974077009      1.3189059179926117       1.6254357786701898       1.8165087759326852       1.9607457598740166       2.0728158488883044       2.164555673800527        2.243582556897663        2.3138118084467068       2.377631695333959        2.436194663401316
3.616957118006899         -3.9237305616652614      0.10034222602212002      1.3189261184103405       1.6254179044878405       1.8164249703370088       1.960670457117997        2.0729584842700426       2.1652101600381006       2.245074034956617        2.3164288571824736       2.3816025207724354       2.4416756824270767
3.6048396657139836        -4.14657557629457        0.10007502374327246      0.7012310318118988       1.0266386225583728       1.2398741632074122       1.402790570397079        1.5317150934682664       1.6386311892315963       1.7315435490003988       1.8147085573135444       1.8907578438031274       1.9609295273134912
3.4443473028761047        -3.831414505634188       0.1003903855918216       1.3190173382561419       1.6253044025290777       1.815848553555452        1.9595988786185414       2.0716179040114366       2.1639333592788423       2.244226207873539        2.3163315589173576       2.382513568447841        2.4437839049389742
3.3895808584899463        -4.042022146926388       0.1000835558105336       0.7126184142190287       1.0382244914155077       1.2507437232740253       1.4129896162124658       1.5415589206437994       1.6485751330064835       1.7420662201771715       1.8262095674058083       1.9035393755795798       1.975202261783299
-0.3830428819802913       -0.9237305616705731      0.10037647571758494      1.3189991002329031       1.6248878002408216       1.8137049176825653       1.9544066117517782       2.062602340651562        2.1507762890356164       2.227000053737474        2.2954335188194754       2.358593190395679        2.4176458944788908
-0.581009331085685        -0.9964654154756025      0.10012238245082127      0.8418922274679864       1.169897391255966        1.3776935390271146       1.5336278648188502       1.65501107402562         1.7548897435543698       1.8418126990185504       1.9202080435143023       1.9927577425634533       2.0606830674328087
-0.8312013574431574       -0.5559714951188168      0.10035491564141408      1.319017694748569        1.6250041932468335       1.814476509607453        1.9567328985252732       2.0673661849408984       2.1586801531304123       2.2385060066049958       2.3107099775237447       2.3775407146677465       2.43995980135361
-0.9176205101855733       -0.7356718305427072      0.10014409759207078      0.7855635040348575       1.112943898410606        1.3224391195900613       1.4808302610511725       1.6054917439199217       1.7091702427036062       1.8001657858560265       1.8826757168684198       1.959187709296639        2.030779192185468
-4.831414505619967        3.555652697145172        0.10035206352519277      1.3190336306128458       1.6249211027507997       1.8136981076173386       1.9541260734031922       2.0614204582294167       2.1475929292109637       2.2202980253198135       2.2834347956300745       2.339415133662703        2.3894992608000893
-5.027743163253193        3.5728125614475044       0.100140676737848        0.7843999395475038       1.1116662335613832       1.3204601552458275       1.4768167044609264       1.5975752732744766       1.6951375460087894       1.7776321423902866       1.8493364565404937       1.912950656449594        1.9698922957120837
-3.44402850501475         2.1687986424675034       0.10042728051974308      1.3188561115914093       1.62518277057784         1.8157351395598547       1.95949233231287         2.071514640166028        2.1638330258430627       2.2441292331741804       2.3162384089346744       2.3824244345023766       2.443698973328988
-3.4468862437903764       1.9800850511862502       0.10013055701138589      0.8249960307870764       1.1535408821658608       1.364188857766452        1.524302825265277        1.6503397323111584       1.7547549874284998       1.8456966039271447       1.927356901321147        2.002265450866305        2.071572319691388
-8                        6.720000000000017        0.09999999999999999      0.10000000000562902      0.10000005107346087      0.1000057494901783       0.1000562136971807       0.10026444955271789      0.10082722408357718      0.10197339260252714      0.10393334883238008      0.10688338546446041      0.11090626076560822
-7.805811856016708        6.60007174485082         0.09999999999999999      0.10000000000860436      0.10000006428310139      0.10000669634814352      0.10006433083737422      0.1003002071587361       0.10093719806594925      0.10223815102677243      0.10447544399658         0.10786388108761767      0.11251437535603166
-8                        6.960000000000016        0.09999999999999999      0.10000000001610936      0.10000010675477992      0.10000987511133268      0.10008938756970952      0.10039487263724318      0.10116749073975047      0.10266232930457235      0.10509978916739736      0.10862484468752372      0.11327049020488161
-7.805891669134328        6.840068250714566        0.09999999999999999      0.10000000002661426      0.10000014105662931      0.10001179226921743      0.10010388322379758      0.10045197388406234      0.10132618729263669      0.10301554903883565      0.1057787159441248       0.10979448499407608      0.11511937782433669
-8                        7.200000000000017        0.09999999999999999      0.10000000004188166      0.10000020965057639      0.10001624053149315      0.10013721123627939      0.1005735795795087       0.10161588868879445      0.103544205851274        0.10656125885250449      0.1107722060059899       0.11615286582504843
-7.8059733577813475       7.080059656515787        0.09999999999999999      0.10000000007483134      0.10000029218794564      0.10002005783581376      0.10016358095377131      0.100669336446875        0.10186192675564261      0.10405598161958161      0.10748716538296436      0.11228710436742813      0.11844703763366192
8                         -7.200000000000017       0.09999999999999999      0.10000000004175906      0.10000020957817013      0.10001623952402382      0.10013720766448964      0.10057357242362112      0.10161587798443371      0.10354419234754847      0.1065612434563767       0.11077218951437723      0.11615284874767652
7.80597902364077          -7.320040943962458       0.10000000000000005      0.10000000018989334      0.10000056476075171      0.10003245878989729      0.10024692140567158      0.10095704826917325      0.10254311803311493      0.10533968016960572      0.10954892153163899      0.11524605872645509      0.12235126331849226
4                         -4                       0.10036137818446215      1.3187453091163324       1.6251531063006446       1.8158543931906548       1.9595568917419952       2.0709438735296186       2.161800835222555        2.239710206846883        2.308596634410813        2.3708844539387672       2.427785197423522
3.8478849700084683        -4.196621336466797       0.10007455562455249      0.7155896910409177       1.0416094478484954       1.254527031448826        1.4169090487534084       1.5449618666960048       1.6506386477176223       1.7419381694190785       1.8231701280082186       1.8970429906991362       1.9648841154777654
3.2930288126091587        -3.707242348985964       0.1003576083410053       1.319084204248652        1.6251680577458583       1.815091606926414        1.9580526781790395       2.06941225703851         2.1613357045847406       2.2415625323309687       2.3139123989358703       2.3806104224072597       2.4426169006958793
3.2581799920751657        -3.9116389918417753      0.10012549806991418      0.7876215858505046       1.115363544219781        1.3260629335030867       1.4861988507835837       1.6126000942207117       1.7177442902596505       1.8097768678511528       1.892839518103363        1.96940031211618         2.0405441740997525
-0.19579962552342106      -0.9806439244929264      0.10049022068903656      1.3190474610418557       1.6249179339681923       1.813687951311653        1.9541841506759392       2.0619326322725846       2.149413931783847        2.2247548086126763       2.2922184860128083       2.354418794181366        2.4125909176568494
-0.3238159837863267       -1.1168793083590245      0.10013373566951948      0.8183165357987544       1.146061854031464        1.3542338302680095       1.510193907457177        1.6311550393581296       1.7301412122964237       1.8158123022217814       1.8927968168456528       1.9639602365431996       2.030645975811719
-0.9235836497710471       -0.38339697687330776     0.10037662287137897      1.319075847173051        1.625151913610511        1.8150502818125303       1.9579834881509757       2.0693552004658584       2.1613987504606995       2.241927114528632        2.3148127080612277       2.382301038235981        2.445329620707217
-1.0458573425992739       -0.5228730636933436      0.10016087152610186      0.8022254079266237       1.1300572146321952       1.3398319375641525       1.4988343536272966       1.6241846805123148       1.7285802049800338       1.8202985130775418       1.9035246739669331       1.9807226407545977       2.052928127811555
-4.707242348956019        3.706971187420798        0.10038982346417635      1.3190732939713252       1.6249531671297388       1.8138176818425273       1.9544989347047215       2.062210098734323        2.148926884570386        2.2222750188735274       2.286142400446562        2.342939322101525        2.393929622959182
-4.869559535366882        3.7735189219329097       0.10014407950441902      0.8156429725435118       1.14346885385053         1.351770019946734        1.507794914870438        1.6283580296935682       1.7259134299275678       1.8085844804767228       1.8806278381319717       1.9447287463621874       2.002301080995337
-3.292757651061382        2.293028812561795        0.10043321373800018      1.3189974683265584       1.6251005908374665       1.8150357807243198       1.95800247843407         2.069365153751787        2.161290374033101        2.2415185981209795       2.3138699131436296       2.3805696678886377       2.4425781348973525
-3.2712921351962403       2.064582783724174        0.10008575142377095      0.7627272695528762       1.0899377040379818       1.3011775150116642       1.461920671571821        1.588979913648586        1.694743859019981        1.7873266617049544       1.8708722898340293       1.94785835279505         2.019378364790612
-8                        7.440000000000018        0.10000000000000002      0.10000000009845249      0.10000038369480231      0.10002533815818741      0.10020120627298361      0.10080110651732176      0.1021652035854143       0.10459339735955953      0.10826232544102805      0.113230550993642        0.11941349417511164
-7.80604813212491         7.3200661311427035       0.10000000000000007      0.10000000019023314      0.10000056475165149      0.10003245438173054      0.1002468893556913       0.10095693735052262      0.10254285745111195      0.10533918955107631      0.1095481220972795       0.115244877063138        0.12234963346370643
8                         -6.960000000000016       0.09999999999999999      0.10000000001604736      0.10000010671255832      0.10000987447207986      0.10008938514668005      0.10039486736705393      0.10116748212608632      0.1026623174326546       0.10509977456863207      0.10862482811362212      0.11327047233299188
7.805947847073803         -7.080063884569145       0.09999999999999999      0.10000000007460576      0.10000029213195587      0.10002005862805209      0.1001635900185459       0.10066937325855387      0.10186202131950593      0.10405617032351995      0.10748748490316694      0.11228758861330211      0.11844771523070786
4.195990236276327         -3.9806058470580057      0.10044562574462042      1.319107692116817        1.6252368683691276       1.8152901516097726       1.9580919201538256       2.0684663650092965       2.1581938839744748       2.234831372067318        2.302288915830033        2.3629990755663424       2.4182103242712962
4.096373491227572         -4.181145410777033       0.10008478595520706      0.7643598981871637       1.0916932545262623       1.3030691089218382       1.463551767017071        1.5894043155383293       1.692697596214639        1.7814441335102607       1.8599507440688507       1.930946371962014        1.9958158957491625
3.1687986425440378        -3.555971495099673       0.10039054256287742      1.3190540635392123       1.6250104633297313       1.8144186175144126       1.9565618115528578       2.0670573835641926       2.1582339291967263       2.2379356395740357       2.310021856437065        2.3767226958325725       2.4389707112190773
3.0779050309786933        -3.711303586412762       0.10013838696302373      0.8138497816385731       1.1417916232621133       1.3510673924718029       1.509432251632565        1.6340852215989103       1.7377703283638473       1.8287581684563137       1.9112011632865367       1.987538296089708        2.058800555897077
2.9777389211833873        -0.33256580227569316     0.10017002838433223      0.2965932222555862       0.3421976730466046       0.3828306444698993       0.4327522752189807       0.49035725796522084      0.5529942235486716       0.6180365297998052       0.6833757759656844       0.7475860383054416       0.810059843006357
2.917211525032547         -0.28289693958327367     0.10020954432663441      0.2966040922435977       0.3419796762694925       0.38204122320756173      0.43142896495249705      0.4887828454936894       0.5514600866273537       0.6167848166012669       0.6825671968289092       0.7473105331195102       0.810361231934084
2.9018231048814567        -0.3415390952473917      0.10008984223922321      0.26216546874782226      0.3095046674209156       0.35165979163830297      0.4036731363706136       0.4640068686741009       0.5298476804174883       0.5983849789779231       0.6673426328074434       0.7351730436864257       0.8012074093862889
2.8675194569967           -0.22238859800859986     0.10021559678719176      0.29659447670893396      0.34201928744074994      0.38210328171236013      0.4314437970706009       0.4887919056939875       0.5515714907955249       0.6171223546943139       0.6832277944746529       0.7483567968813047       0.811824824402381
2.8347878545338108        -0.2708277443633318      0.10005366251688673      0.2614065717285646       0.3087663359256298       0.3508343298253709       0.40271609693972893      0.4630385363496287       0.529048609720404        0.5979347235099369       0.6673729967068436       0.735764573484861        0.8023994977545451
0                         -1                       0.10037179839266012      1.3189822201969665       1.6248563732916939       1.8136050749826371       1.9540341300136979       2.061627562558002        2.148862020284324        2.223882449029447        2.2909908449796506       2.3528381313322626       2.4106861455718507
-0.1654075107095213       -1.1324696462650141      0.100132932969124        0.8652525743258678       1.1932449828497356       1.4003169179344601       1.5551501442687938       1.6748013019573247       1.7723725169432643       1.8565720457519383       1.9320800425594145       2.001807589858761        2.067133838575199
-0.9806058470731583       -0.19599023620051478     0.10039252536397114      1.3190924394348862       1.6252826354213192       1.8155739234175965       1.959037452932653        2.0709001166367096       2.163357797913044        2.2442363047918277       2.3174420473291915       2.385240067006824        2.4485598321437902
-1.1259291360757673       -0.30360507909775114     0.10016485482900807      0.8099931670710321       1.1381407992683987       1.348370696848721        1.5079886694708364       1.6338628195643794       1.7386706245914303       1.8307209359416745       1.914246138315893        1.9917337883122366       2.064204783431468
-4.555971495101576        3.8312013574546886       0.10054082112752975      1.3191047246519827       1.6249978648681773       1.8140770479741877       1.955230509640354        2.0636143604033736       2.151137105531143        2.2253876507212396       2.29024946610164         2.3481374653043288       2.4003186936253953
-4.66301425613996         3.9159357498537375       0.10016802161629175      0.9020164676332392       1.2297537657996862       1.4361365347218638       1.590743570005906        1.710167172869636        1.8069206473817148       1.8891022715100143       1.9609289621787513       2.0250533097301173       2.0828714679473626
-3.1685854943221523       2.444347302941434        0.10036761222281598      1.31914247867087         1.6250817807062423       1.8144822493499786       1.9566191466179308       2.0671097018741382       2.158282137708019        2.237980487346927        2.310064057150761        2.376762957638711        2.4390096703593453
-3.1451236154462534       2.227132373785568        0.10011293770175315      0.8445640368926125       1.1727886988918235       1.38163573961062         1.539716950464484        1.6640513290384096       1.7673735342946075       1.8579278897589184       1.939849078557632        2.015569572093732        2.0861306143014136
-3.4222610788544077       5.667434197749566        0.10022508905034351      0.2966488559507679       0.34364032670753747      0.38632092663646334      0.4358418592529106       0.49003372277621243      0.5471416625155516       0.605465479915877        0.6636375732132985       0.7207192004423469       0.7762887906062469
-3.4827884749706994       5.717103060419972        0.10019953023370094      0.2966169071834349       0.34282800224743903      0.3833245111928623       0.430052350568072        0.4815163034562661       0.5361576062893116       0.5923445773132113       0.648679524187244        0.7041743399897745       0.7583562021910358
-3.5050550054690612       5.6452720500083355       0.100039812486427        0.2538862158710154       0.30293614739940117      0.34715489930867355      0.39827470917194413      0.45431075236235546      0.5135083434835286       0.5741220068203097       0.6347111176658989       0.6942726963259584       0.752340037125352
-8                        7.6800000000000175       0.10000000000000002      0.10000000020809084      0.10000065080169872      0.10003733706497912      0.10028062671212205      0.10107075304684932      0.10279334002309093      0.10576051644951305      0.1101154690009306       0.11586621466829712      0.12286872104281328
-7.806112263258847        7.560077791817921        0.1000000000000001       0.10000000043524544      0.10000101209492222      0.10004964829456316      0.10035483021769627      0.10131120451251537      0.10335008400724766      0.1068166548295681       0.11186992865878452      0.11852269393798488      0.12662349008239715
8                         -6.720000000000017       0.09999999999999999      0.10000000000560187      0.10000005104977815      0.10000574907439412      0.1000562119530372       0.10026444533512524      0.1008272164705714       0.10197338114448072      0.10393333373555325      0.106883367422549        0.11090624060132383
7.805913456820164         -6.840050024309142       0.10000000000000005      0.10000000002648389      0.10000014097195674      0.10001179018576334      0.10010387078164673      0.10045193182860014      0.1013260858982805       0.1030153518349105       0.10577838618637543      0.10979398928419794      0.11511868929949652
4.383396976921764         -3.9235836497509315      0.100398385341262        1.3191206917389269       1.62508885227811         1.814553611443798        1.9564342321521617       2.065738246296179        2.154298230288771        2.229674331956555        2.2957580056371296       2.354973815873522        2.4085862943096994
4.277485393434044         -4.1154968665624105      0.10012314381395475      0.8522139008493198       1.1805194115004916       1.389326582367314        1.5469664675220118       1.6697655953239086       1.7700217160265626       1.8557851418162665       1.9313210230309126       1.999325652481714        2.0611931509188963
3.07641635024115          -3.38339697690269        0.10055881916571612      1.3191187361576886       1.6249931126211725       1.8140675220114295       1.955539553636345        2.065176425779369        2.155466233656162        2.234388347103023        2.3058880158169344       2.372237722706168        2.4343616696888497
2.976565443380904         -3.4720787624216882      0.10017371753950048      0.9120412281871125       1.239634568674551        1.4458530919836847       1.600878198570308        1.7219379679122544       1.8221419618278005       1.9099644753011567       1.9896419090728663       2.063635884917455        2.1329506187736103
3.046782847270586         -0.3694922246942302      0.100200637095872        0.29661347308598124      0.34271531416991025      0.38446728855260154      0.4353335960816795       0.4933563578168443       0.55594548848819         0.6205942054424719       0.685329828581707        0.748831350761575        0.8105492500905962
2.981630353199717         -0.415173336987005       0.10005303572243916      0.2531533858699678       0.3013625728260864       0.3451619607360152       0.398855182882329        0.46047578248032334      0.5271879030020564       0.5962439350585439       0.6654767942996203       0.7334331122382746       0.7995045771005059
2.8305665400604973        -0.15335879067444333     0.10019685283610354      0.2965971772715427       0.3422394993671643       0.3827274551236352       0.4323509345773055       0.48986849679789785      0.5527964741202711       0.618527788402971        0.6848561094856312       0.7502433265802351       0.8139877373349597
2.7804126103229847        -0.21029544501139721     0.10003846518538587      0.25301569666347246      0.3009649301923771       0.34393975005690214      0.3967502223569323       0.45799922376139157      0.5249820523536833       0.5949033350702905       0.6654228741864686       0.7349170299714044       0.8026508019280022
0.19599023620051478       -0.9806058470731583      0.1004170057643035       1.3189927733010829       1.624875049766807        1.8136428227955823       1.9541395841557436       2.061887651320584        2.149369019813377        2.2247105419413473       2.2921752912061386       2.3543768118638795       2.412550241608056
0.10740361775897973       -1.1665423892977558      0.10014219019084662      0.7969510525194492       1.1244305404899235       1.3329940393822872       1.4892214993485142       1.6102769658042124       1.7091330446709614       1.7944852706504923       1.8710575844475847       1.9418065387383832       2.0081363355754758
-1                        0                        0.10039577929198244      1.3189241964759368       1.6251909630513446       1.815653992361849        1.9593280055201208       2.071367209859345        2.1639586587289155       2.244938810230865        2.318232403458058        2.386115703065213        2.4495168694258083
-1.1565232333518267       -0.07881137687751215     0.10015952311943822      0.8273694686802359       1.1558464444009398       1.366054663611515        1.5256949409329243       1.6514753333909409       1.7561046846169541       1.8479318878647162       1.931227317621356        2.0084984007246285       2.0807615645773114
-4.383396976921764        3.9235836497509315       0.10039954622208856      1.3190700647096174       1.6250536555290171       1.8145221457428855       1.9564052566832089       2.0657104711348135       2.1542712205950534       2.2296479501693893       2.295732193965511        2.3549485048105314       2.408561455630315
-4.5560131476059125       4.013175016791314        0.10013600434577881      0.8363832307189171       1.1643729698278074       1.3726844878329711       1.5292888599504924       1.6508218618945139       1.7496437747760305       1.833816131103973        1.907583509825016        1.973632966335552        2.033377728577911
-3.076269438263888        2.6169571181777593       0.1003978347624127       1.318935373368634        1.6248653938081021       1.8139585013675974       1.9554425141314244       2.065084892349256        2.1553773507801126       2.2343010667277206       2.3058019958903326       2.372152960047619        2.4342782502464
-2.9614186552247004       2.449387630680029        0.10012141819292775      0.787235837700267        1.1145440294632467       1.3238494337969955       1.4819238969109512       1.6062157208349088       1.7095672617031277       1.8003553964896508       1.8828050594022698       1.959390146335023        2.0311281530015672
-3.532480542989239        5.777611401970379        0.10016489232165214      0.2966039602791188       0.34197960376532976      0.38006786876708987      0.42375089474167665      0.4723431806762454       0.5244846403500496       0.5785872352474072       0.6331889312535457       0.6872254112451355       0.7401586187076675
-3.5584172147816484       5.700570937927632        0.10005717684696551      0.2543264889690832       0.30251786073607784      0.3444243228863136       0.39267493625746575      0.4459942406452035       0.5028042648608969       0.5614025438964974       0.6202952852705773       0.6784143384015532       0.735235341659006
-3.3532171528173156       5.6305077753422195       0.10021744112140862      0.2966727795417026       0.3441875684213023       0.3883693373953996       0.43994998445204964      0.4963298784875993       0.555565856164902        0.6158526080821246       0.6757973329919906       0.734465852705689        0.7914622113068058
-3.437661437251576        5.613103551199076        0.10005654482891176      0.2618264761582463       0.31113874956450355      0.3566043394424601       0.4093821226813103       0.46701225861700907      0.5276030438815448       0.5893611391626835       0.6508700823866113       0.7111655897396655       0.7698218703265093
-8                        7.920000000000017        0.10000000000000005      0.10000000039269462      0.10000101819558797      0.10005180606491004      0.10037136294408049      0.10136649310063643      0.10346084298131446      0.10697065287191458      0.11200112113987744      0.11850944815193142      0.12629684220555898
-7.806149819207903        7.800067133317792        0.1000000000000001       0.10000000089039547      0.10000167315212018      0.1000715477133561       0.10048408186437686      0.10171644622564957      0.10424201618079994      0.10840618570833048      0.11431803534937308      0.12192614922734295      0.131011579219955
8                         -6.480000000000017       0.09999999999999999      0.10000000000179447      0.10000002344011134      0.10000329422633736      0.10003514893635672      0.10017759974498135      0.10059233518560173      0.10148520161124475      0.10309096003953921      0.10560806605312972      0.10915785458398582
7.805865524929403         -6.600010850612801       0.10000000000000005      0.1000000000085568       0.10000006422540682      0.10000669380375514      0.10006431211498786      0.10030013557987534      0.10093701103192391      0.10223776634647037      0.10447477378394056      0.10786284150387289      0.11251289649535527
4.555971495101576         -3.8312013574546886      0.1004134206816856       1.319087286864998        1.6249865516776474       1.8140641424480521       1.9552177680349496       2.063600962054862        2.151123162542909        2.225373380483012        2.290235034975494        2.348122935767031        2.400304129429662
4.520899162854881         -4.02433812038922        0.10017150218163347      0.8530612739593558       1.1811527254434209       1.3891579280899842       1.545543033813316        1.666885056127246        1.7655629948330878       1.8496403046444991       1.9233581389399694       1.989398735355772        2.0491707647659756
3.019394152925051         -3.195990236191555       0.10038884993154151      1.319081456904388        1.6249492960593697       1.8138473428498474       1.9548933066188794       2.0638959758305275       2.1534635697565876       2.2316934138821365       2.3026186442700665       2.368560965702739        2.4304459242520267
2.903781299332102         -3.3517198042243717      0.10014047868206799      0.8477996477133471       1.1757651210461113       1.3835274732473248       1.5397054344740067       1.6617377711632997       1.7627649772796483       1.8513559285188343       1.9318373033013223       2.006728362272201        2.0770393034846215
3.1216801498962483        -0.3922575698182583      0.10016405284606844      0.2966354270666386       0.34338340714661625      0.38650153595537884      0.43842573643097044      0.49681874862877257      0.5592126720353197       0.6232742473979814       0.6872017970822498       0.7497987868637158       0.8105771808044026
3.0482684545142136        -0.43883774735981423     0.10005115837941624      0.25585285486217163      0.30448287260368806      0.34925927804722573      0.403670354284535        0.465448687770666        0.5318541078304931       0.6002768174178906       0.6686887810587545       0.735739596847634        0.8008741096926973
2.8077576611491257        -0.07839609437208056     0.10016355717921113      0.29661209368894353      0.34248158137938794      0.3834193812679675       0.4333841362716608       0.49109979416305233      0.5541608738484677       0.6200138557422691       0.6864742314803642       0.752008961564921        0.8159088619308232
2.753501440096398         -0.1385384893229951      0.10005621914293898      0.2540574159468281       0.3022332401008155       0.34566245174249577      0.3987786299381508       0.46015773983849956      0.5271902212106266       0.5971459096749845       0.6677122006484909       0.7372729713886642       0.8050854352322726
0.38339697687330776       -0.9235836497710471      0.10058928965373008      1.3190361568693751       1.624906912074415        1.8137276275192014       1.9544296338150888       2.0626278882738154       2.1508045620013223       2.227030961026308        2.295466861877948        2.3586288288999655       2.41768349207678
0.34161312541744226       -1.0662760624718708      0.1001871887221838       0.9326922823753613       1.259853468750412        1.4650431573401244       1.6183671501119286       1.7367970274976088       1.833488895672501        1.9170907071792302       1.9921602582783826       2.061495930319249        2.126406108781151
-0.9806439244929264       0.19579962552342106      0.10045819738728108      1.3190439593957615       1.6252361424107467       1.815528099636023        1.9589933541012436       2.070857432866322        2.163316411154471        2.2441960858079417       2.3174029239387903       2.3852019794078356       2.4485227648037085
-1.122874140614726        0.15363458369662356      0.10019932040296868      0.8949239849593884       1.2232013480242174       1.4315148382155731       1.5893720937099762       1.7133865992052804       1.816365657898657        1.9066642674692136       1.988524089805032        2.0644271847333866       2.1353839306221323
-4.195990236276327        3.9806058470580057       0.1004425707225151       1.3189659278931396       1.6251292138686322       1.8151933257999608       1.9580029197959739       2.068381866885727        2.1581125433970922       2.234752658455561        2.302212515725791        2.3629247237035          2.4181378027319944
-4.291892194450611        4.110523049281715        0.10011590327499452      0.8555392417310274       1.1838142416539734       1.39247820154032         1.5499581497213393       1.6725902287315535       1.7726797084354662       1.8582768302426727       1.9336436217528072       2.0014743610191625       2.063163858900239
-3.0193560754494726       2.8042003747650717       0.10041029414248848      1.3188090801250674       1.6247497173024055       1.8136785170519973       1.9547442005002427       2.0637591155044          2.153335069711366        2.231571374690488        2.3025019128554587       2.3684487790586863       2.430337664578651
-2.866015194036874        2.6180594781760123       0.10008259444780278      0.7376081281607183       1.0634653573192054       1.273229444363327        1.4315520928132004       1.5560359300220057       1.6595253504565282       1.750486655146503        1.8332414391532093       1.9103230337252202       1.98274787482589
-3.569433459918105        5.846641209274012        0.1001667727577021       0.2965902665275456       0.3412612534653941       0.3772133435817529       0.41817169049311764      0.4642306183260008       0.5142106931190531       0.566552318363416        0.6197213771252578       0.6725741986819234       0.7245091161923327
-3.617299541086787        5.786807566426081        0.10006553368353459      0.2534063819935907       0.3005898408966819       0.3395306875481973       0.38406544956985345      0.43394828078028896      0.48783356779468606      0.5440532071623042       0.6010152211768589       0.6575441136318187       0.7130292184501351
-3.278319850193622        5.607742430199685        0.10020997457779893      0.2966663400673476       0.3443017287229766       0.3890143245417622       0.4416416346131762       0.49943657516124973      0.5602724791854635       0.6221962467907386       0.6837261189495181       0.7438805191448765       0.8022583571156766
-3.344181386028306        5.576347042533422        0.10010026908098753      0.2657378317745907       0.31535978853202984      0.3620693313422263       0.4166899473738111       0.47636633796745687      0.5389996221334724       0.6026675551746252       0.6659086083678069       0.727750370159023        0.7877888994385159
-8                        8.160000000000018        0.10000000000000009      0.10000000065731106      0.10000146348378199      0.10006752240024057      0.10046550866971536      0.10166293676476483      0.10411239145395845      0.10812753105279856      0.11377513549009183      0.12096537972317649      0.1294524504452463
-7.806080699762795        8.039993345923264        0.10000000000000016      0.10000000161648592      0.10000254089782122      0.10009687935704613      0.10062577002044544      0.1021434163076184       0.10515409669447785      0.10999439499968332      0.11672136353514474      0.12522239281900538      0.13521904285769512
8                         -6.240000000000016       0.09999999999999999      0.1000000000005606       0.10000001131348955      0.10000202824021086      0.10002369066231376      0.10012851803687868      0.1004557750404264       0.10119560217990263      0.10258401724608694      0.10483255024845124      0.10808694905849947
7.805828316482969         -6.359983089252256       0.10000000000000005      0.10000000000256797      0.10000002879728741      0.10000385753895298      0.10004082075303998      0.10020573439976875      0.10068672287846571      0.10172530573957485      0.10360074083278577      0.10655186482310397      0.1107286385835947
4.707242348956019         -3.706971187420798       0.10038391775377879      1.319060083695482        1.6249438429749123       1.8138145905113072       1.9544987390871649       2.0622122349590306       2.1489306135466966       2.222279842566146        2.2861479613773845       2.342945431348597        2.3939360974336794
4.71533763684986          -3.9174873946298763      0.10017585214169648      0.8168749261371154       1.144670729574855        1.3531108049995273       1.509526384609563        1.6306912353292766       1.728997880711103        1.8125311459849696       1.8855389318991305       1.9507082547847714       2.00945636966525
3                         -3                       0.10041973836107221      1.3188583648311678       1.624763657102242        1.813633136169585        1.9545477718260307       2.06332637249787         2.1526219518088725       2.2305802570790823       2.301272419730564        2.367042356937812        2.428817375575099
2.8456830251354766        -3.0660615262536726      0.10011102526051159      0.8350245476081272       1.162960962781476        1.3708688604751493       1.5269002805561411       1.6485435317279598       1.7490470529600393       1.8371108493286619       1.9171683177622099       1.9918010799286143       2.0620231945981886
3.2                       -0.4                     0.10018899513111339      0.29664146846843953      0.34397786847056283      0.3882421901298125       0.4408990446907392       0.4993128176535701       0.5611776233855592       0.6243563311971677       0.6872224947770799       0.7487010899147227       0.8083576989586948
3.1631057191918512        -0.4657906968609125      0.10005410018056925      0.2542402775747279       0.3039586113731578       0.35086911002742344      0.4069047137905358       0.46928481677983863      0.5354701861593968       0.6031156854792074       0.670443647237998        0.7362822436845469       0.8001608725649269
2.8000000000000003        0                        0.10016668150736321      0.2966076054994632       0.3425730758746881       0.3837023582889445       0.4338155539628426       0.4916174049374441       0.55473286839321         0.6206304619105905       0.6871359535321596       0.7527197862059837       0.8166708197968066
2.733374050522888         -0.032788366967688054    0.10006188484697372      0.253897576498507        0.30233869181000084      0.3462788850301315       0.39979360486232635      0.4614105826813258       0.5285959196009874       0.5986749785576145       0.6693621456458284       0.7390512513941571       0.8069955427839997
0.5559714951188168        -0.8312013574431574      0.10040704965329117      1.319103874922348        1.62497469678983         1.8138943530596512       1.9549554963496787       2.0638512154628743       2.153036193805403        2.2304958086365625       2.3002591190307493       2.3647233710942186       2.424971481371406
0.47787438465403365       -1.035187562096379       0.1001380616571735       0.8766327851653023       1.2045969664974054       1.4114674422570312       1.5663978663992497       1.686571196490026        1.785101440887231        1.870596875179426        1.9475533246015073       2.018711316096556        2.0853342580497896
-0.9237305616705731       0.3830428819802913       0.10045305888100152      1.319151174307815        1.6251974458568792       1.8150851477838996       1.9580129232078192       2.069382542647375        2.161425506018121        2.241953817795799        2.3148396380993415       2.382328370917608        2.445357485799258
-1.064087668374037        0.3615977584557471       0.10023131267943468      0.920878723557762        1.248625884082316        1.455718401401754        1.6123583277457079       1.7352679296796798       1.837294007397087        1.9267610624621638       2.007857556934745        2.0830315636926438       2.153295659214618
-4                        4                        0.10038457215651574      1.3187349168377511       1.6251497314386139       1.8158504500024548       1.9595531456761373       2.0709397502847993       2.161796394684631        2.2397055880746777       2.308591933989871        2.3708796977557878       2.4277804141500883
-4.089812249649899        4.174605898599732        0.1000846731748287       0.7811216441299641       1.108885341206821        1.3199875110608266       1.4801737930028875       1.6056918995601797       1.708665160433611        1.7971232244526176       1.8753704779598022       1.946129751667876        2.01078126478853
-3                        3                        0.1005109974784703       1.3190265808561792       1.6248739183988032       1.8137252730572386       1.9546269856296787       2.063398800702011        2.1526900869155035       2.2306450705874177       2.3013344720163893       2.367102083600132        2.4288751380797464
-2.851740141766278        2.8567617112254187       0.10008169744860541      0.8326585552831605       1.1605966862577548       1.3685736870156942       1.524711338098532        1.6464992089435113       1.7471653326306742       1.8353897403771227       1.9155909010660486       1.9903420523271858       2.0606568209770137
-3.5922423388324822       5.921603905535902        0.10017436804381885      0.29658574669254983      0.3407976323424346       0.3752930054996722       0.4143685788421625       0.45868548488623334      0.5071941672964304       0.5583523889129841       0.6105710489167848       0.6626472929321969       0.7139331860982696
-3.6499265094858373       5.877418585221481        0.10007157679689298      0.25467536235565463      0.30113360577528375      0.33792967097101373      0.37973215674860145      0.4270813811412298       0.47881105493629134      0.5332774434611202       0.588812744291355        0.644159765233956        0.6986438980985062
-3.2                      5.6                      0.10016657878755611      0.2966452605693677       0.34398011037107307      0.3882438140494762       0.44090010205167485      0.4993134653704698       0.561177993036792        0.6243564836480751       0.6872223699783316       0.7487004215719563       0.8083558081957855
-3.258804522328468        5.5506170242509025       0.10008395118409368      0.2623433751636813       0.3121384047179273       0.35931666427454984      0.4149797757951763       0.4761907484838003       0.5406454990906697       0.6062422578402069       0.6713987502335459       0.7350718487436904       0.7968407037167639
-8                        8.40000000000002         0.10000000000000013      0.10000000097143862      0.10000192642294765      0.1000825090095591       0.10055205279239399      0.10192805574397339      0.10468295067343865      0.10912396666970124      0.11528366106810445      0.12303287978360329      0.13208874861723124
-7.806011695383402        8.27996379435763         0.10000000000000035      0.10000000258603413      0.10000353025591235      0.10012294640739905      0.10076523956117918      0.10255022759660563      0.10600212540378405      0.11144323365799526      0.1188820690011949       0.1281525888473294       0.1389276834198516
8                         -6.000000000000015       0.09999999999999999      0.10000000000028524      0.1000000079573075       0.1000016413796645       0.10002007930295857      0.10011271116899896      0.10041109643484301      0.10109980403857309      0.10241501552257985      0.1045725663550865       0.10772655995063239
7.805802867459498         -6.119971789630195       0.09999999999999999      0.1000000000008634       0.10000001535630744      0.10000261231418857      0.10003001162919654      0.10016086254028071      0.10056494137360805      0.1014718499129781       0.10316347983857636      0.10589062324453256      0.10982362567488503
4.831414505619967         -3.555652697145172       0.1003561320054639       1.3190241226740185       1.6249118887671141       1.8136917440879712       1.9541208968033812       2.061416244887696        2.14758939926606         2.220294977562277        2.283432092341177        2.3394127078914035       2.389497048518054
4.883313078612852         -3.769649387725309       0.10016148874121551      0.7965680808286123       1.1240741328535633       1.3327322963225938       1.489102989085869        1.6100291215499476       1.7079177603313263       1.7908801772938514       1.8631777665888671       1.9275028231498224       1.9852735343644985
3.0193560754494726        -2.8042003747650717      0.10040813989225954      1.3188894212258377       1.6248083802556          1.8137338023193117       1.954795331664186        2.0638079840092107       2.153381919572529        2.2316162222139537       2.302544832041302        2.3684900175593895       2.430377403558477
2.820432920357975         -2.8594221925885517      0.1000821355993996       0.7576312113191968       1.084189774603631        1.293535639786742        1.4510891863209563       1.5744608959868764       1.6766973914177874       1.7664291108393242       1.8480853369757673       1.9242567206946537       1.9959611122916525
3.278396094533758         -0.39224233881856        0.10020500898435729      0.2966659452089759       0.34430219696058245      0.3890142505643685       0.44164074734544         0.49943457748226644      0.5602691986908473       0.622191653207854        0.6837203194902571       0.7438737963363765       0.8022512999417452
3.2400655091195607        -0.4735344181120323      0.10004301488177567      0.24983631683498644      0.30029024624668316      0.3484588712696758       0.4053868865780651       0.4680531398999683       0.534060311424783        0.6012321072724885       0.6679389098438707       0.7331099538514535       0.7963170943305844
3.353358790773868         -0.3694334598982297      0.10018622537377937      0.29666654215626204      0.34418262870466904      0.3883629965192662       0.43994104229267955      0.4963178939412          0.5555507859790111       0.6158346659218752       0.6757768583985394       0.7344433045811125       0.7914382605321488
3.3108774513578507        -0.4450070096663675      0.10005453100577975      0.2591900676135163       0.3092649218509224       0.35675211470704365      0.41245370789287544      0.47340199759906626      0.5373937856044183       0.6024260738134187       0.6669902224736056       0.7300889136896603       0.7913154977307895
2.807742430227278         0.07831985033181595      0.10018320121355916      0.29661274396503223      0.3424819942508625       0.38341971121318064      0.4333844734604876       0.4911001278411308       0.5541612024070589       0.6200141936511421       0.6864745983657775       0.7520093753382768       0.815909333376562
2.745424303490325         0.0645704061036491       0.1000773242639545       0.25881671364036246      0.306960253509271        0.3504407708612166       0.4034444894765487       0.4645412843095623       0.5312025706365218       0.6007579752280878       0.6709267473920909       0.740107447695475        0.8075571475604963
0.7072423489840459        -0.70697118739276        0.10041172149413938      1.3190876690141298       1.6249876036488278       1.8141182032447505       1.9557117927318373       2.0654691797589457       2.1557777466656423       2.2345314877505085       2.3056496598402205       2.3714312403585724       2.432886155872573
0.6997014748717073        -0.920642058507255       0.10016183096097205      0.834497952309035        1.1624824698645588       1.3705699736466084       1.5270163672899673       1.6491888323020796       1.7500785589998429       1.8381553817717171       1.9177503307457118       1.9914609876152267       2.060450792694502
-0.8314145056510349       0.5556526970986869       0.10040622101151435      1.3190175740702914       1.624999781116326        1.814465940549435        1.9567208641050757       2.0673536574602687       2.158668235605488        2.238495302506061        2.310700876161404        2.377533340801469        2.4399542499858753
-0.9899980959470989       0.5827165742575203       0.10015127970743555      0.8539584878759249       1.182179859175459        1.3905867325664711       1.5481316183327836       1.6719278416575405       1.774810500012504        1.8650942892395677       1.9469554084017233       2.0228477484403466       2.093812232881971
-3.804200374485309        3.9806439244946694       0.10040490633409875      1.318953179009037        1.6254647755516907       1.816532507019871        1.9607661681853046       2.072834427665628        2.1645729128291795       2.2435985301969543       2.3138266302079105       2.377645520255933        2.436207694759464
-3.8517211274129233       4.185599641219072        0.10008423061033846      0.741590797935156        1.068593428105795        1.2811412793876802       1.4430556755817219       1.5705409950672693       1.675647054733439        1.7664065012760477       1.84712837634947         1.9205149213050687       1.987890200366104
-3.019394152925051        3.195990236191555        0.10038005729272606      1.3190371233636151       1.624919513148553        1.81382242033988         1.9548713479244226       2.06387578188465         2.1534445852730344       2.231675438123822        2.302601542933989        2.3685446299279653       2.43043023784235
-2.8704791934844565       3.048131629620442        0.10014493007609793      0.9026831916857075       1.2303297261559145       1.4364898433354825       1.5909382331946331       1.711007686742149        1.8100255170878783       1.8966954398754736       1.9754285400622265       2.0487855211955943       2.1177738441968352
-3.5999999999999996       6                        0.1001801172730156       0.29657047657752583      0.34062513788282844      0.374604943434666        0.41300806580392885      0.45670369855261417      0.5046900143740257       0.5554307684207342       0.6073162920479505       0.6591216911419001       0.7101818191114818
-3.6641668000876813       5.971649857551951        0.1000664534750575       0.2554027197800362       0.3015276564775448       0.3373045355885553       0.37778944308964046      0.4239160738819768       0.4746088698354583       0.528236079817607        0.5830917276328426       0.6378776282704751       0.6918873063476177
-3.1216039055413223       5.607757661166434        0.10017168154442739      0.2966326327848194       0.3433798926053951       0.3864955305563666       0.4384176767493903       0.49680971799797496      0.5592035825396613       0.6232656954828767       0.6871939714174257       0.7497914086789358       0.810569300049626
-3.1538834102069373       5.529325791834055        0.10005141713048238      0.2510710326928602       0.30088906714404823      0.347933799999912        0.4041946710199236       0.4668947525370985       0.5334627878268517       0.6015233650885393       0.6692756469990897       0.7355325390818782       0.799817038486478
-8                        8.640000000000018        0.10000000000000019      0.10000000126420061      0.10000231710161327      0.1000943861283049       0.10061882530847858      0.10212855367945987      0.1051079028217312       0.10985722011264352      0.11638334900921939      0.12452877980082498      0.13398497634246143
-7.805889094002648        8.519971101707206        0.10000000000000044      0.1000000036333439       0.10000447616461712      0.10014599541028919      0.10088440418509294      0.10288922359358499      0.10669571079608788      0.11261106854620224      0.12060426952191315      0.1304677106981398       0.14183823822187971
8                         -5.760000000000016       0.09999999999999999      0.10000000000055802      0.10000001130595403      0.10000202800217915      0.10002368952854852      0.10012851546978045      0.10045577137137111      0.1011955986340146       0.10258401610202961      0.10483255593380007      0.10808697172337271
7.805775168582066         -5.879977255432554       0.09999999999999999      0.10000000000086118      0.10000001535326197      0.10000261248148044      0.10003001404762746      0.10016087522668483      0.1005649816352165       0.10147194424279123      0.1031636615455558       0.10589092987237099      0.10982409687163748
4.923730561626203         -3.3830428820872886      0.10036215550217882      1.3190131909632343       1.6248983132021242       1.8136407104499837       1.9539480168486547       2.0610145144409824       2.146861726741957        2.2191588454570965       2.281815373244469        2.337247226692864        2.3867126477197274
5.025814921414874         -3.57233075760407        0.10014878081979824      0.7890452972082412       1.116404073338244        1.325118496506069        1.4813916039934563       1.6020587448436887       1.699534310395147        1.7819507647746133       1.8535847119593443       1.9171347380834656       1.974017333934112
3.076269438263888         -2.6169571181777593      0.10035404092178779      1.319040853181583        1.6249524599596121       1.8140303389242682       1.9555056482027218       2.0651419469723646       2.155430406899583        2.2343513757108253       2.305850297387646        2.3721996016033775       2.434323510970733
2.8752904698716706        -2.6706309799530197      0.10012373374012118      0.7958849657151935       1.1233177613811742       1.332149965966761        1.489337954544811        1.612425431441989        1.7144659818144283       1.804020659410558        1.885438672087527        1.961259327012036        2.032496901194106
3.4223885980695474        -0.33248054296253354     0.10018553172672591      0.2966497778796211       0.3436409492498254       0.38631852802584643      0.43583509483054494      0.4900224047814008       0.547126007149965        0.6054459232371262       0.6636146201556985       0.7206934273552935       0.7762609524934487
3.407712966204095         -0.4099180676330338      0.10007802050874438      0.25864774978908306      0.30841797948521105      0.3548826116223723       0.408935807902952        0.4678890306824694       0.5297586334784178       0.5927024484845423       0.6552948015868857       0.7165758227267364       0.7761331518841637
2.830507775364901         0.1532171528720119       0.10018931016813624      0.29660132891666874      0.3422431714693189       0.38273186155639294      0.43235603306574366      0.48987396834053576      0.5528021276588924       0.6185335556817461       0.6848619920771671       0.7502493537507157       0.8139939287298195
2.7683463737882805        0.15177879271476186      0.10008529982692196      0.2597239303129862       0.30756866778484093      0.3504915653741621       0.40303895623653246      0.4638303519870913       0.5302628424750268       0.5996128124959611       0.6695754171594329       0.7385417411168622       0.8057744692572172
0.8314145056510349        -0.5556526970986869      0.10038628081717486      1.3189713282204316       1.6249676159053028       1.814442199876921        1.9567020430985484       2.0673380414241347       2.158654598387799        2.238482987062218        2.31068947495702         2.3775226475317326       2.439944068470419
0.8576699632623696        -0.756796251923871       0.10019203105419316      0.8669369999598168       1.1949927550635921       1.4025993526849305       1.5590199750817504       1.6815135041833567       1.7830255651602838       1.8719283267050593       1.9524308586798589       2.0270209317658976       2.09678218733696
-0.7072423489840459       0.70697118739276         0.10056617647678738      1.3191084475851742       1.6249964665253518       1.814130708039104        1.955724678086747        2.0654837107692514       2.155793606324292        2.2345481967715064       2.3056668311640043       2.371448689773604        2.4329036990101587
-0.8265845616257321       0.7650371062732675       0.10017845049237395      0.9141362547561169       1.2417252980989388       1.4479656348401202       1.6031073526617394       1.7243066935208433       1.8245710683717111       1.9122869236422484       1.9916604606268422       2.0651749960495036       2.133915524454934
-3.616957118006899        3.9237305616652614       0.10038192623466202      1.31912284605158         1.6255597637101311       1.8165408913535204       1.960771010253463        2.0730489717682787       2.165293830253524        2.245152534977019        2.3165032859059034       2.3816735243277036       2.4417438676567764
-3.66609047206949         4.120100325873873        0.10012351899166472      0.803606555280805        1.1321398976509238       1.343705452998533        1.5046494273537505       1.6312102406722666       1.7356929153704208       1.8262146241452577       1.907041895583122        1.9808011189340975       2.0487368163838124
-3.07641635024115         3.38339697690269         0.10035611967518705      1.3190501954261966       1.624957514034842        1.8140323149374393       1.9555073202212145       2.06514413899449         2.1554336777844965       2.2343558352682376       2.305855785766086        2.372205759837122        2.434329999101348
-2.871219733317574        3.3088774762250384       0.1001334993162184       0.7997555386415235       1.1273364572042668       1.3360971852664685       1.4931759145835175       1.6161118732027926       1.7179866991454489       1.8073801004321377       1.8886517422198745       1.9643460698495259       2.035477362056767
-3.5922575698113675       6.078319850138262        0.10021156701337001      0.296582205354791        0.3407942876071418       0.37528963674234467      0.41436496900572833      0.458681654253497        0.5071901632395527       0.5583481818939942       0.6105663266361393       0.6626412487838023       0.7139241307171719
-3.647610476384285        6.062784454726224        0.10008211202174158      0.26296256929913336      0.3088702030921224       0.3445951563189789       0.3850453363396424       0.4310413979837236       0.481501383853712        0.534809337551534        0.5892870875452824       0.6436604407371799       0.6972385355061037
-3.046641209238082        5.630566540096809        0.10016026767626189      0.29660036615634033      0.34270323164012884      0.384454761677393        0.43532069372848414      0.4933438632898281       0.5559341795672917       0.6205846190210749       0.6853220542733031       0.7488248766835875       0.81054261255805
-3.074332860163818        5.532800142304108        0.10003504375982153      0.24513497233218012      0.294542381879554        0.34069921511854245      0.3965436440459218       0.4595738181921755       0.5270415291460065       0.5963664726021073       0.6655666410892888       0.7333288583600296       0.7991188708563407
-8                        8.880000000000017        0.10000000000000027      0.10000000144425614      0.10000254246471607      0.10010097823570833      0.10065528148207692      0.10223669090832228      0.10533496119638924      0.11024606785862358      0.11696292867041401      0.12531296602310307      0.13497416833544276
-7.805801308299306        8.760026619906421        0.10000000000000064      0.10000000446810271      0.10000516681066825      0.10016195142725172      0.10096498815423861      0.10311460765462911      0.10715105122051659      0.11337017877668089      0.12171503384251388      0.13195149632136063      0.14369402718909807
8                         -5.5200000000000164      0.09999999999999999      0.10000000000178548      0.10000002342061058      0.10000329370150161      0.10003514659193062      0.10017759466669456      0.1005923281393819       0.10148519507667948      0.10309095897786498      0.10560808078905189      0.10915790934377374
7.805747918902308         -5.639989351146741       0.09999999999999999      0.10000000000255542      0.10000002878600824      0.10000385812232433      0.10004082857819518      0.10020577355971515      0.1006868431314517       0.10172558159999272      0.10360126534360732      0.10655274363424198      0.11072998634496624
4.9806439244781355        -3.195799625597494       0.10045641913118908      1.3188935378159867       1.62479566666896         1.8135412199531238       1.9538079991216633       2.0607752775609405       2.146463055490124        2.2185459018416274       2.280940088051104        2.3360652179917887       2.3851790263191406
5.11670416955666          -3.3278137404884767      0.10012958669758061      0.8159794248629954       1.1436774331304898       1.3518320294058501       1.5074790985313273       1.6273888551341926       1.7240389920514847       1.8055892150584703       1.8763204737893318       1.9389266118573498       1.9948162413954813
3.1685854943221523        -2.444347302941434       0.10035931487399244      1.3190518560986975       1.6250196364211313       1.8144327221703127       1.9565768783587667       2.067071947728172        2.158247211564949        2.2379475813350256       2.3100326987613498       2.376732886678384        2.4389806619405356
2.9752742389759934        -2.4256589335995615      0.10014817018090037      0.7889767831726394       1.1164058430906227       1.3257522241815438       1.483907958170654        1.6082972909851267       1.7117476707608674       1.8026193508936104       1.8851250041727672       1.9617321308759095       2.0334594009148934
3.482896939593787         -0.2827884749569355      0.10017490066994349      0.2966200209200996       0.34282960687164254      0.38332179516799736      0.4300440598023159       0.48150262150805845      0.5361390786804608       0.5923218877739819       0.64865334729389         0.7041453761753155       0.7583253394350844
3.4896659705363575        -0.36477241398166793     0.10007417935104891      0.2550476517155054       0.3042270912141715       0.3488612858797571       0.4005095049577491       0.4570478861778043       0.5166849095241738       0.5776642548348302       0.6385543464315444       0.6983645459239384       0.7566401641688137
2.867434197779552         0.22226107889927504      0.10019007873969042      0.296603797901751        0.34202707058733905      0.38210985300342204      0.4314492982087765       0.48879656639257346      0.5515755732733674       0.6171261130060771       0.6832314229312783       0.7483604256973397       0.811828530216108
2.806087298027392         0.2285344947397774       0.10009637106834594      0.2609780025649803       0.3084764182264116       0.35077595225292374      0.4028229641396715       0.46326562817316647      0.5294052718470726       0.5984574521954826       0.6680980929592556       0.7367187081776668       0.803595655434556
0.9237305616705731        -0.3830428819802913      0.10041642888411977      1.3191230302354875       1.6251785202840778       1.8150694087543942       1.9579993477687987       2.069370157282055        2.1614138525208952       2.241942711775149        2.3148289743685004       2.3823180869131173       2.4453475249746197
1.0074908026386984        -0.5857822370210701      0.1001514240114005       0.8117461535036509       1.1396778423549          1.3490685006345098       1.5075907847383714       1.6324278838620894       1.7363250691062466       1.8275711010893494       1.9103456946185908       1.9871106839830366       2.0589098139420057
-0.5559714951188168       0.8312013574431574       0.10037258546209774      1.3189666358731487       1.6248744764509522       1.8138080979498412       1.9548787733076896       2.063780469234631        2.1529696226923414       2.2304325031618717       2.3001984494530223       2.364664875318583        2.4249147866860836
-0.7485658103341601       0.8750022914247084       0.10014642916135637      0.8471099702294468       1.1750981008646824       1.3829525612195346       1.5393023653794353       1.6614939606359267       1.7625111877803123       1.8507923754361373       1.9306248321430661       2.0045670891162186       2.0737557605251777
-3.4443473028761047       3.831414505634188        0.10048940885213313      1.3190277951001195       1.6253103743862825       1.8158489509438038       1.9595970305723698       2.071614603711504        2.163929516389173        2.244222345590061        2.316327958467567        2.3825102543362564       2.4437809150744276
-3.4145128035266343       3.984389579600169        0.10012844707524438      0.8630119374015003       1.1916664572130642       1.4012273268346849       1.5602917092941924       1.6853132766191568       1.7888427591970564       1.879049346029552        1.9601044845770603       2.0345106225936984       2.103396715753751
-3.2930288126091587       3.707242348985964        0.10037848320461783      1.319045143138619        1.6251349440213774       1.8150584609638074       1.9580205741891006       2.0693806364301905       2.1613046087758927       2.2415320132602643       2.3138824997022707       2.380581083140386        2.4425881202812674
-3.2743315466527267       3.905846424752117        0.1001324051482936       0.8238696630029976       1.1521244697379511       1.3620923716819993       1.5214767312289459       1.6470435208117247       1.7513544161651409       1.8425821340720445       1.9248687101664415       2.0006780004693674       2.0710939619252944
-3.1687986425440378       3.555971495099673        0.10046980769666274      1.3190226306587545       1.6249897356222693       1.8144097658448848       1.9565585650013013       2.067058394388588        2.1582376054792736       2.2379410035003464       2.310028303183942        2.3767299685870524       2.4389785719426915
-2.9813486582967745       3.5709066957658417       0.10013154496869121      0.8062523262816611       1.133914802120762        1.3429179492250911       1.5007189779930838       1.6247156328674548       1.727776077242174        1.8182740968865068       1.9004222639132935       1.976685505920307        2.048081250579665
-3.075849341589234        3.692181468072528        0.10012524084751438      0.8389783493177015       1.1670977359150478       1.375764090307512        1.5334980405193603       1.6574751419567122       1.760505720108233        1.850885565193176        1.9327697498035163       2.00859386782332         2.0793847957580804
-3.5694922246735947       6.153217152779174        0.10021807949427897      0.29659828893098045      0.34126742125786846      0.3772163553135973       0.4181703439041248       0.4642250124868802       0.514201188642422        0.5665391893492211       0.6197042770097546       0.6725517012304867       0.7244779152385957
-3.6242340516490175       6.145848385633839        0.10010003252203362      0.2649916127076383       0.31120706720041824      0.34810903562532475      0.39009080454946526      0.43747373980552207      0.48906744162244625      0.5432469926830115       0.598388027602342        0.6532720593738666       0.7072501556122887
-2.977611401952914        5.6675194570224425       0.10018917623245537      0.2965876065269455       0.34219223827877654      0.38282406284042714      0.43274470974418433      0.49034943735718906      0.552986842297205        0.618030038486065        0.6833701043616048       0.7475803403967157       0.8100519463336741
-2.98254051169704         5.5740977100698315       0.10003536367389897      0.2481221011370567       0.2965724755985581       0.34077547462121277      0.3949544298358804       0.45708547850948833      0.5243065599997011       0.5938557376745633       0.6635611900603028       0.7319681089046587       0.7984684773578395
-8                        9.120000000000019        0.10000000000000041      0.10000000144436134      0.10000254250757222      0.10010097842196146      0.10065527914199306      0.10223666704901098      0.10533482829814904      0.11024557820436424      0.11696143645255469      0.1253092034373095       0.1349658658185857
-7.805821484328316        9.000065467720816        0.10000000000000099      0.10000000478929938      0.1000054195480055       0.10016763270702518      0.10099334384005058      0.10319323887305297      0.10730885523669674      0.11363176032045917      0.12209571373930107      0.13245706881686803      0.14432201112168683
8                         -5.280000000000015       0.09999999999999999      0.10000000000558205      0.10000005101502203      0.10000574827913378      0.10005620865700353      0.10026443860189072      0.10082720763136825      0.10197337399451378      0.1039333369963012       0.10688340088234434      0.11090635157414291
7.805739337159807         -5.399998622538082       0.09999999999999999      0.10000000000851851      0.10000006420418435      0.1000066951867571       0.10006432781762241      0.10030020723170652      0.10093721755929182      0.10223822075640639      0.10447561492532571      0.10786422901439208      0.11251501251130012
5                         -3                       0.10050755504242713      1.3190315448447745       1.6248765841540003       1.813599957241687        1.9538408318614289       2.0607707988537167       2.1464046028596404       2.218416085240724        2.2807230738319055       2.335746291063534        2.384743315253969
5.1513965820618335        -3.140206291128645       0.10008904810401532      0.8256932730514644       1.1535847042736467       1.3615437794579799       1.516978354787913        1.6366256489300441       1.7329877088219148       1.8142333504404056       1.8846448972991487       1.946914580371653        2.002448407220339
3.292757651061382         -2.293028812561795       0.10038568449670841      1.319101116625375        1.6251790171692335       1.815101935003375        1.9580606387067376       2.0694182951736564       2.1613401461693744       2.241565882369011        2.3139152372118357       2.38061334862548         2.4426204268966045
3.122764067817141         -2.228856161152916       0.10016140647102455      0.805379778963044        1.1332483887277893       1.3429204850178806       1.5018010527077978       1.627000982301135        1.731181622782555        1.8225683294503014       1.905299676438107        1.9818146794842224       2.053155396726765
3.532565802246845         -0.22226107885977722     0.10025573966965522      0.2966114154457802       0.34198520493275303      0.38006801627526904      0.4237440213737626       0.47232965786011044      0.524465274061074        0.5785629589288858       0.6331606256967655       0.6871939709231835       0.7401251819182265
3.559107535931816         -0.2868428358056665      0.10006363861555846      0.2585592535213114       0.3064464138569221       0.3477802829856582       0.3953375020166084       0.4479647287235036       0.5041209916079855       0.5621173542902812       0.6204567408124725       0.6780645461030635       0.7344099718815005
3.5694922246466674        -0.15321715284411203     0.1001782148800544       0.2965905265602132       0.3412611117991999       0.37721104542721207      0.4181661108676349       0.4642218624781905       0.5141991733648574       0.566538560597709        0.6197059620935315       0.6725578737058396       0.72449309544065
3.583713625241123         -0.23833447536162425     0.10007632005084113      0.26315840511315725      0.3102797553688452       0.34976518115953975      0.39502557973594726      0.44546340979854737      0.4996757437273128       0.5560049939087551       0.6129123490542071       0.66927350958131         0.7245156256986661
2.9171030604114723        0.2827884749621964       0.10016982299524142      0.2965960492217322       0.34197274525392546      0.3820341553381289       0.43142169867645264      0.48877567243810655      0.5514534451832251       0.6167791264954742       0.682562748125956        0.7473074867547306       0.8103596571616892
2.8480158538199296        0.3081538938781734       0.10007165766479376      0.2538494303634052       0.30149480265557965      0.34395890077557917      0.3964129002950118       0.4574038360872608       0.5241026138118904       0.5936525908182547       0.6637151483328189       0.7326896144360157       0.7998728866391495
0.9806439244929264        -0.19579962552342106     0.1004031663803356       1.3188902430630083       1.6251219353676551       1.8154262809185202       1.9589006608212711       2.0707694742209193       2.163231512822023        2.244113612832326        2.3173225643910444       2.3851234590456523       2.4484459026498238
1.0744825649722691        -0.3513954769319875      0.1002035859697525       0.9027251744945982       1.2307462876879656       1.4384225492676743       1.5955917726529738       1.7190065512838935       1.821497326540133        1.9113919724725918       1.9928883064801421       2.0684418311802752       2.1390667632692586
-0.38339697687330776      0.9235836497710471       0.10035851031099186      1.3190015652530405       1.6248955071006002       1.8137168780835913       1.954420542402714        2.0626182841020233       2.150794195168754        2.2270200846241344       2.2954557013741375       2.358617482670472        2.4176720408711474
-0.5423317812443136       1.041004293482296        0.10014627072681703      0.7911713666661968       1.118577129829433        1.3273831107888527       1.484234199983095        1.6065070530760437       1.707149726192987        1.7947110958074408       1.873669434690722        1.9467571931879923       2.0152267325006057
-3.5325658022696578       6.222261078825642        0.10023177970957065      0.29660647988109806      0.34198094472146306      0.38006501790695935      0.4237424314219562       0.4723293055262631       0.5244658625717927       0.5785638703383043       0.6331602785227122       0.6871890387866997       0.7401091239306478
-3.5874525986287793       6.235921327109519        0.10006033816727251      0.2620214628331366       0.3091568662595487       0.3485894503396454       0.39377811077319586      0.4441625113779651       0.4983457194708591       0.5546686641626762       0.6115858520871035       0.6679657737261068       0.7232284075518135
-2.91710306040434         5.717211525044937        0.10025243121255077      0.296602472810611        0.34197801460893756      0.3820387395596107       0.43142570788505114      0.4887792395761869       0.5514565735759652       0.6167816357463545       0.6825639865779913       0.7473059188720762       0.8103519953276782
-2.9123744824259985       5.640080333022691        0.10004170041021244      0.2578970849648024       0.30547516221561427      0.34800497730734886      0.400464010167688        0.46123791898659133      0.5274855441928264       0.5963868191629479       0.6656700845707694       0.7337946924030644       0.8000978237766085
-8                        9.36000000000002         0.1000000000000003       0.10000000126312751      0.10000231701104888      0.10009438584505707      0.10061881730962015      0.10212847878450171      0.10510748257295453      0.10985566779456958      0.1163786239740036       0.12451688997880798      0.13395880100040133
-7.805938229371229        9.24005393216225         0.10000000000000113      0.10000000446380831      0.10000516299833699      0.10016186739626433      0.10096457595320336      0.10311345270726424      0.10714854445285416      0.1133653287052744       0.12170589866666702      0.13193463163149013      0.14366355613768364
-8                        9.60000000000002         0.10000000000000013      0.10000000096805328      0.10000192594042508      0.10008250670982309      0.10055203497161867      0.10192791265694472      0.10468216101759807      0.10912106581512222      0.11527488434302709      0.12301091092868092      0.13204063097746455
-7.806001811082187        9.480044327831619        0.10000000000000057      0.10000000362279231      0.10000447286326185      0.10014593270115558      0.1008840890415074       0.10288826526291557      0.10669329163865103      0.11260546880408519      0.12059161099085068      0.13044080033587346      0.14178464695128448
-8                        9.840000000000018        0.10000000000000013      0.10000000065368657      0.10000146283145621      0.10006751799571378      0.10046547503059038      0.10166268848405875      0.10411106295721005      0.10812271537877788      0.11376072254705559      0.12092960853084235      0.12937472167788794
-7.805992243532           9.72013527182798         0.10000000000000035      0.10000000257278185      0.10000352889459012      0.10012293903309111      0.10076519110362338      0.10254991567950099      0.10600060060984794      0.11143795289614074      0.11886675951856028      0.1281153608125973       0.1388479502237057
8                         -5.040000000000014       0.09999999999999999      0.10000000001603278      0.10000010667884962      0.10000987373290775      0.10008938223397885      0.10039486182159552      0.10116747587314649      0.10266231576579608      0.10509979234425247      0.10862490160806092      0.11327068853007997
7.8057582826679655        -5.159998107909009       0.09999999999999999      0.10000000002641053      0.10000014096105943      0.10001179324733127      0.10010389869018192      0.10045204502647957      0.10132638698971452      0.10301597890487514      0.10577950535548732      0.10979579588781484      0.11512142403501281
4.980605847056986         -2.804009763718573       0.10038114590066119      1.3190393725386256       1.6249129369545963       1.8136365832749648       1.953890846851248        2.060848695294363        2.1465296922065162       2.2186074790286865       2.2809977485567017       2.336119671837782        2.385230886996462
5.135636840268392         -2.9608592188499068      0.10014849398714162      0.8870479813549259       1.2148683879574265       1.4213210082162004       1.5753857515818035       1.693685332106332        1.7888159079768795       1.8689607799661272       1.9383810196210383       1.9997438834740549       2.0544398570836133
3.44402850501475          -2.1687986424675034      0.10041089236383248      1.3190851196999274       1.6253558823517609       1.8158815185905788       1.959621835670746        2.0716328397134376       2.1639431707152283       2.244233119197524        2.3163372273825593       2.382518985823548        2.4437899229727846
3.305323233450233         -2.0787030677792555      0.10014959024088328      0.8408761626379629       1.1693829225946992       1.3790928782158771       1.5382379507318638       1.6635004520225107       1.7674634178592397       1.8583053348482415       1.94017266364288         2.01553428230519         2.085481994150108
3.5922575697867347        -0.07831985026163055     0.1001884891499274       0.29658805291720447      0.3407997462044862       0.37529448802478776      0.41436900357982165      0.45868485596224035      0.5071926006188789       0.5583500902701356       0.6105684050263737       0.6626450539355215       0.7139328710523145
3.6370483273759158        -0.15224119447634796     0.1000641793408167       0.2566746907296848       0.30324702896630557      0.34054993009095574      0.38301111574979657      0.43094124311056686      0.483127495649005        0.5379249639668805       0.5936932960165037       0.6492032315920281       0.7038015335865442
2.9776114019286273        0.3324805429613129       0.10017231003645417      0.2966054861277882       0.34220799023565696      0.3828381683346449       0.4327571340348273       0.49036032023823645      0.5529963252295086       0.6180383344612513       0.6833777125285457       0.7475883459765912       0.8100626487954887
2.913546121429964         0.3708596281822769       0.10007398467941832      0.25340740432730563      0.3011954673432022       0.3440447038932542       0.39690353229054093      0.4581105875480897       0.5247973517133807       0.5941276713268288       0.6638240523723354       0.7323446041669605       0.7990290557686879
1                         0                        0.1005418170142904       1.319014529135897        1.6252449161506977       1.815704248638329        1.9593738980636255       2.0714122649885907       2.1640033933577465       2.2449830656331455       2.318276028315788        2.3861587523288943       2.449559360486823
1.145656136001545         -0.10611567457873068     0.10013361068520223      0.8495759952156151       1.1781015513782458       1.3877259755940312       1.5468038842204666       1.6720151436802724       1.776107098461712        1.8674340641820242       1.9502583528322381       2.0270797518900747       2.098912866517112
-0.19599023620051478      0.9806058470731583       0.10038332643889021      1.3190974633728865       1.624958422413399        1.813719460992607        1.9542108538779102       2.061955663488211        2.149434631927806        2.2247741736248          2.2922371758861915       2.3544371434672704       2.4126091352917234
-0.30779826250672937      1.125142267401354        0.10015892734925635      0.8091219173927007       1.1368196054364448       1.3451896735320397       1.5013248203003575       1.6224435457950277       1.721554379311813        1.8073198820051124       1.884381540166457        1.9556173702348587       2.0223786899627156
-3.4828969395839864       6.2827884749667415       0.10017103081983739      0.29661568229557866      0.3428253627506937       0.383317643163367        0.4300399247633062       0.48149851055580595      0.5361348721749405       0.5923169803705489       0.648645701645622        0.7041304808211843       0.7582943130848675
-3.5597570256490223       6.29468858770434         0.1000572116415059       0.2554492323263484       0.3035410173976904       0.3452394425642841       0.3932364749741903       0.4463071540014674       0.5028874340271062       0.5612788177987894       0.619983839647463        0.6779287299375207       0.7345821970944223
-2.8674341977324143       5.777738921171258        0.10018425920133527      0.29659793327270084      0.3420218375600262       0.3821053385618708       0.43144551626463135      0.4887934262964983       0.5515729265544416       0.6171236084801164       0.6832280368842119       0.7483538582438777       0.8118140058791588
-2.8699044630439596       5.695803841896408        0.10007278671545305      0.26483682653889445      0.31199769901480795      0.35383304959954115      0.4054680315908234       0.4654832915821466       0.5311032136016333       0.5995197758625274       0.66843296387634         0.736268514102391        0.8023348473159684
-8                        10.08000000000002        0.10000000000000009      0.10000000039092634      0.10000101780805278      0.10005180128832787      0.10037130933122916      0.10136608605279877      0.10345869657366469      0.10696296448790198      0.11197839127244712      0.11845362835014749      0.12617680631101016
-7.8059480581600775       9.960374285561594        0.10000000000000031      0.10000000160831703      0.10000254020484904      0.10009687820466928      0.10062572734299678      0.10214298932044034      0.10515177085663403      0.1099861293516516       0.11669731149327957      0.12516408044345315      0.13509486958431371
-8                        10.320000000000022       0.10000000000000002      0.10000000020775933      0.10000065069386006      0.10003733153218104      0.10028054128578832      0.10107009189854747      0.10278989919270602      0.10574834280443494      0.11007999183968066      0.11578022291903299      0.12268624210945074
-7.805863516363349        10.200770776736919       0.10000000000000013      0.10000000088852261      0.10000167275882588      0.10007153022920849      0.10048390113548779      0.10171540319108364      0.10423753701227596      0.10839178885136343      0.1142784869450003       0.1218334420409009       0.13081873104904093
8                         -4.800000000000015       0.09999999999999999      0.10000000004185548      0.100000209614148        0.1000162397710604       0.10013720825590629      0.10057357388453851      0.1016158827377391       0.10354420784686985      0.10656129550132099      0.11077234364663636      0.11615325989643914
7.805801634721913         -4.919989947303999       0.09999999999999999      0.1000000000746231       0.10000029222748176      0.10002006496288153      0.10016363578816197      0.10066953715471579      0.10186242226307142      0.10405695719007917      0.10748883225975357      0.11228970881450219      0.1184508984859463
4.923583649743311         -2.6166030230598767      0.10039099445940598      1.3191175830477193       1.6249720656448072       1.8137069915303254       1.954008348214562        2.061072173273715        2.1469178796669675       2.2192139817338923       2.281869781821703        2.3373011964119152       2.386766413816018
5.11832802714639          -2.7037466601658595      0.10014791728628201      0.8330897360539723       1.1610531242790811       1.3688664376290796       1.5241752529580135       1.643717655931873        1.7400148854403998       1.8212389203148718       1.8916674115522214       1.9539880848776525       2.0096053506535507
3.616603023289068         -2.0764163501615474      0.10056610067076137      1.3191088502669608       1.6255404630999237       1.8165285081492835       1.9607612111118076       2.073042179446466        2.165289698274552        2.24515102459901         2.3165045444276484       2.3816778760010044       2.441751489431319
3.5301448704227525        -1.975261251673607       0.10017876790817788      0.9113305364226119       1.2396482544806418       1.4481159924224436       1.6062172316690364       1.7301503172296129       1.8324594377857069       1.9213037557922796       2.000872160653969        2.0736945912045          2.140936203326894
3.5999999999999996        0                        0.10017312231078046      0.2965690394010047       0.34062409029729096      0.37460401300036206      0.41300720516502437      0.45670291281078895      0.5046893454885637       0.5554303506956717       0.6073165555465466       0.6591236394132353       0.7101876029903642
3.652765062123915         -0.06063399498545741     0.10008515076990498      0.26013386481573403      0.3061476536407782       0.34195738413777116      0.3825046503994797       0.42862673307553223      0.47923844964883433      0.5327174414769887       0.5873781016031348       0.6419407011851473       0.6957120126994053
3.04664120913306          0.3694334598595939       0.10016916175779496      0.2966166700772468       0.342717320505166        0.38446748416286364      0.4353321646088502       0.4933542118643946       0.5559434863551105       0.620592991996998        0.6853297880469588       0.7488326640571318       0.8105519889063644
2.9925023444596466        0.4192973604663058       0.10007093534841956      0.2538571084004117       0.3021160031344505       0.34604286737526185      0.3998224434360786       0.46144281981797436      0.5280826139298679       0.5970153248985772       0.6660954891558754       0.7338859243146008       0.7997868818752688
0.9806058470731583        0.19599023620051478      0.10039177855174666      1.3190289651878473       1.625234360450768        1.815526115528921        1.9589916672735326       2.070854514018325        2.1633122088247223       2.2441908727918407       2.3173969271395647       2.385195257370764        2.4485153789311003
1.1311236633666586        0.041018827195728885     0.1001677109371926       0.8989781384996288       1.2272333528887653       1.4355200660133562       1.5933773402930935       1.7173726760925767       1.8203140074999211       1.9105636582862062       1.992372855666752        2.0682290445064013       2.1391415312874353
0                         1                        0.10039065428954197      1.3190155329225766       1.6248758337039715       1.8136209982710103       1.9540476878051292       2.0616397871913454       2.1488734024610285       2.2238931816484584       2.2910010560039344       2.3528479129635964       2.410695577507789
-0.07085794217752438      1.154917073811334        0.1001456441432456       0.8326426997081765       1.1606032356201246       1.3684514797651117       1.5239683437033504       1.6442535132565805       1.7423581179252337       1.8269971330654287       1.9028876762499907       1.9729766801268058       2.0386649618810684
-3.422388598014508        6.332480542999348        0.10018876845599119      0.2966410541395634       0.34363303885114865      0.3863115006784762       0.4358287628301013       0.4900167279882814       0.5471207614422938       0.6054402045376363       0.6636055717641921       0.72067488936423         0.7762210701370758
-3.478785124620388        6.362148633704057        0.10007828795893399      0.26007847692972963      0.309057088144424        0.35349392751591036      0.4049376049417982       0.46124784083000475      0.5206338845687314       0.5813428417015436       0.6419477315876314       0.7014606268311566       0.7594258662416937
-2.8305077753404047       5.84678284718706         0.10018851561058364      0.29660889889648046      0.34224968824750296      0.3827377492220566       0.4323613409973719       0.48987872648757524      0.5528062204343961       0.6185365356074852       0.684862416636754        0.7502439625010464       0.8139760440044876
-2.7984468154149305       5.765631841487286        0.10006571802110942      0.25547662250376785      0.3032222104917694       0.3458586686792751       0.3983388319945698       0.4592819318531696       0.5259596118393272       0.5955638393428836       0.6657539273694244       0.7349098464305658       0.8023010104228471
-8                        10.56000000000002        0.10000000000000002      0.10000000009848879      0.10000038367479765      0.10002532992943947      0.1002010663369352       0.10080002232798124      0.10215964448451269      0.10457401051597426      0.10820681940294913      0.1130982108611926       0.11913730306314568
-7.805679130205992        10.441555162207427       0.10000000000000005      0.10000000043490431      0.10000101079258683      0.1000495819066524       0.10035429845046902      0.10130874883211911      0.10334118623611498      0.10679073548732222      0.11180335296795264      0.11837326230768765      0.12632232115745226
8                         -4.560000000000016       0.10000000000000002      0.10000000009858567      0.1000003837601463       0.10002533882063612      0.10020120832900818      0.10080111101470106      0.10216521439944075      0.10459342766430058      0.10826242238973405      0.11323083225760205      0.1194142291780758
7.805858722195456         -4.679981400813266       0.10000000000000005      0.10000000019059956      0.10000056523454785      0.10003247204968145      0.10024699906990404      0.1009572957599617       0.10254367950101655      0.1053407248710232       0.10955064469688312      0.11524870879321701      0.12235521600574838
4.831201357396053         -2.444028504810761       0.10036773398990632      1.3190123807255176       1.624903170426396        1.813683579915485        1.9541133348176496       2.061409279506162        2.1475832573880433       2.2202898772842397       2.2834282210893218       2.3394101975561634       2.389496062019423
5.047314800950284         -2.4844579039188703      0.10016857553567103      0.8070126897600165       1.134683072495739        1.3430562102267791       1.4989603234077717       1.6192006190195813       1.7162402512023505       1.7982290693820773       1.8694430772772377       1.9325756958413798       1.9890386587598876
3.804009764094473         -2.0193941528678834      0.10039912411317997      1.3190428195554          1.6255259527492212       1.8165762817182007       1.9608007618517915       2.072862630877094        2.1645971542682405       2.2436203635327407       2.3138471884545373       2.3776654817647795       2.4362276627663078
3.653478533586058         -1.906396670455067       0.10014281334539077      0.8583529819108612       1.1872205337946984       1.3974295480528474       1.557073120344465        1.6823225695419552       1.7856001002759194       1.8750491883587073       1.9549166063210135       2.0278032080084123       2.0949367844535476
3.592242338826641         0.07839609449332079      0.10017540990374318      0.29658653365535875      0.34079845079385307      0.37529368915786804      0.41436902791283886      0.45868569023918054      0.5071941667311505       0.5583522897705496       0.6105711503694259       0.6626482736233589       0.7139365090044913
3.666212348403792         0.029457359953558467     0.1000683328984411       0.25420828742831464      0.30037564950875467      0.33619914472800866      0.3767402284037247       0.4229344388504925       0.47370344971118467      0.5274126082271727       0.5823533904781303       0.6372260046675517       0.6913237839191764
3.121603905394331         0.3922423388041875       0.10017523732876941      0.29664063084368525      0.34338788375664825      0.38650512100880346      0.43842850141562045      0.49682114950383904      0.5592151450792884       0.6232771062039639       0.6872052097486004       0.7498028136433285       0.8105818312781689
3.079435434199496         0.45154814469923543      0.10007250376311562      0.2541424328552548       0.3031432130711082       0.348637882760274        0.40366437975656577      0.4657890658850011       0.5323143142904919       0.6006954293444067       0.6689706638252138       0.7358383584902516       0.8007678936469625
0.9235836497710471        0.38339697687330776      0.1003882236989369       1.3190885233626588       1.625159335002925        1.81505503642196         1.957987086256542        2.0693580476953577       2.16140114554759         2.241929211693682        2.3148145956917823       2.382302757512427        2.44533120969612
1.1165700848283535        0.2917288435476258       0.10014771321531257      0.8403364482651942       1.168789225690826        1.3783463125566666       1.5372979321983988       1.6624557713078432       1.766563437456634        1.857949228715327        1.9408436075826463       2.0177285369823115       2.0896223303748247
0.19579962552342106       0.9806439244929264       0.10052848610084726      1.319116542010909        1.6249636823327638       1.8137250534926068       1.9542160831012068       2.061961379326948        2.149440653051437        2.224780009533112        2.2922424872535796       2.354441781103129        2.412613071245137
0.1780317440313475        1.1152083055843447       0.10015072237385839      0.9058825331560761       1.233499506003806        1.43946367841376         1.5933309732010883       1.7120706298221164       1.808822306399661        1.892285359212782        1.9671132136192113       2.0361924139448364       2.100889489516422
-3.353358790700803        6.369433459928561        0.1002056001428789       0.29666636407022234      0.3441821033991457       0.38836242861890263      0.43994040512044735      0.4963170796227938       0.5555493771674078       0.6158313563638004       0.6757678327796567       0.7344205434644889       0.791386600631571
-3.4005241710106358       6.407137829798152        0.1000978299297004       0.26197003613110814      0.31157412261733763      0.35785010052734917      0.4117115724496325       0.4704733992694773       0.5321512927816152       0.5949016985645351       0.6572967516924251       0.7183732175187956       0.7777129449079071
-2.8077424301986174       5.92168014981173         0.10018249604683464      0.2966020513365238       0.3424724675444581       0.3834110205394595       0.43337666213607035      0.49109318854887085      0.5541549438847708       0.6200079377786608       0.6864662454070877       0.7519943078717295       0.8158783521773357
-2.7691501652703456       5.859065087326352        0.1000870288788025       0.26221921191870046      0.3099714130312758       0.3527911007115064       0.4051810884304262       0.4657693924084524       0.5319746026995426       0.6010890245689694       0.670816131821443        0.7395499273189887       0.8065500697901113
-8                        10.800000000000018       0.09999999999999999      0.10000000004184895      0.10000020957918813      0.10001622608404435      0.10013697145550797      0.10057175460506305      0.1016067457961931       0.1035129437790172       0.10647378181631656      0.11056793695741553      0.11573518793706968
-7.804239054710593        10.68276563883542        0.10000000000000005      0.10000000019112361      0.10000056590928008      0.10003246666798704      0.10024674552058144      0.10095521722208478      0.10253352884330462      0.10530689704111836      0.10945792734143377      0.1150349081047899       0.1219210164718018
-8                        11.04000000000002        0.09999999999999999      0.10000000001605723      0.10000010667141675      0.10000985069047781      0.100088970812291        0.10039173725092443      0.10115220687786779      0.10261133749619267      0.1049610490904704       0.10830889603257604      0.11263975829073407
-7.803999186425226        10.926075405987268       0.09999999999999999      0.10000000007436192      0.10000029020062111      0.10001991042703919      0.10016222707069243      0.10066265228813633      0.1018375850933619       0.10398677120051149      0.1073170633428462       0.11192224919004333      0.11774434309618932
8                         -4.3200000000000145      0.10000000000000005      0.10000000020810866      0.10000065090607328      0.10003733896190962      0.10028063408545844      0.10107076941639581      0.10279337227186158      0.10576058762903458      0.11011566296432242      0.11586673687024619      0.12287002783242156
7.805916126549068         -4.439966392759623       0.10000000000000005      0.10000000043668711      0.10000101331057905      0.10004968105453027      0.10035501210980492      0.10131175628652876      0.10335128536651163      0.10681881520374192      0.11187338805679285      0.11852787206482061      0.1266310115865901
4.706971187372142         -2.292757650995344       0.10037757033798704      1.3190737376193065       1.624955131926754        1.8138247255224853       1.9545079202237885       2.0622213932086217       2.148940307816777        2.2222904321549057       2.2861597218111376       2.342958609739523        2.393950940771578
4.924961848516664         -2.2874314386063044      0.10015376398032054      0.8062734483492705       1.1339568996495861       1.3424045504875026       1.4985048184918741       1.6190865432247445       1.7165949311534583       1.7991587623716343       1.8710415062540162       1.9349325993662363       1.9922467172327603
4                         -2                       0.10047270759363099      1.3189210269442002       1.6252798018884584       1.8159640642164663       1.959654679984703        2.0710349484883834       2.1618872900980297       2.2397928880260585       2.308676067005092        2.3709611130309196       2.4278595128084652
3.937237000729091         -1.853819093102686       0.100126705957206        0.8563898760514439       1.1851561506130535       1.3950723199561332       1.5542382962431536       1.6787443392792676       1.7809115835935183       1.8688383879573587       1.9468115784548596       2.0175085779728406       2.082256341547612
4.195799625602386         -2.01935607552284        0.1003878055970696       1.3188886911700932       1.6250768317072741       1.8151423372538245       1.9579550305430606       2.0683348886792663       2.15806641154583         2.2347077648731632       2.302169268935284        2.362883342261848        2.418098501545086
4.383042882078396         -2.0762694383701077      0.1004407410395411       1.3190914513114034       1.6250677024410825       1.8145382685705826       1.956421861686309        2.065729198368879        2.154292239093989        2.229671263133577        2.2957578471981837       2.354976732779461        2.4085924310387243
4.347473821134793         -1.9267437949521322      0.10020746677470564      0.9092327672524515       1.2370378949436887       1.4440079997490078       1.5998392802215082       1.720829007796959        1.8193643814069786       1.903498770241749        1.9774642197740913       2.0439281341925377       2.104277083943939
4.101448816635038         -1.8377914361197296      0.10012854235312972      0.8089894839212158       1.137198741294734        1.3476898065930467       1.5072321583423707       1.632056267088293        1.7343572960756146       1.822183358492213        1.8998314164648955       1.970014759447482        2.0341102050179445
3.569433459913079         0.15335879073809533      0.10017205127960072      0.29659133842289         0.3412622012097856       0.3772140287704122       0.41817202554548755      0.46423060295189955      0.5142103734763063       0.5665517904915331       0.6197208574104404       0.6725741516364965       0.7245105425247248
3.650128805953095         0.12025911200118812      0.10007420456421189      0.2549058563744791       0.3013442668728849       0.3380937770847911       0.379836957919172        0.42712853729961114      0.47880610363395254      0.5332269313071708       0.5887224417431365       0.6440346182245613       0.6984885943096163
3.5324805429734734        0.22238859805319067      0.10017310045292292      0.2966091091705345       0.3419842944371608       0.3800721035737845       0.42375461238340234      0.47234630482432727      0.5244871411145016       0.5785891421916166       0.6331903764932242       0.6872267125198633       0.7401604789241999
3.618023509436494         0.2067506291690779       0.10007049010910811      0.25466923530886626      0.30175196447255653      0.3404743997757185       0.38473686050154215      0.4343527382921227       0.4879928202192138       0.5439936834508606       0.600760183594213        0.6571126845233262       0.7124371950979066
3.3532171528294676        0.3694922246527409       0.10020011188871043      0.29665404279098667      0.3441713503165145       0.3883531123403631       0.4399336271773468       0.4963136963183547       0.5555502735378226       0.6158380119330817       0.6757840205390294       0.7344541094958698       0.7914525034154939
3.4222610788549934        0.33256580225004245      0.10016296577335129      0.296647317548921        0.3436395886713207       0.3863208886603551       0.4358422869104182       0.4900344441212534       0.5471426158653419       0.6054666670019769       0.663639054028061        0.7207211404464007       0.7762915979968112
3.416648096948637         0.41387464589798306      0.10005661975876523      0.2543141556544426       0.30429615885294786      0.3510250231991405       0.4053508847426727       0.4645762239616698       0.5267160831317567       0.5899283014741558       0.6527870527272093       0.7143318449335955       0.7741490903816092
3.4827884749598352        0.28289693959088763      0.1001609665415123       0.29662607629973853      0.3428362357205259       0.38333243176785337      0.43005992022059836      0.48152333094136623      0.5361639497002494       0.5923501700966739       0.6486844105330163       0.7041787274014228       0.7583606031776664
3.505996171172331         0.35915956173642916      0.10006483870839615      0.25165497512656465      0.3008401000713596       0.3452886563030711       0.3966779876206923       0.45298813851817615      0.5124520738689133       0.5733187141988222       0.6341469654976595       0.6939347687226155       0.7522170230703905
3.2                       0.4                      0.1001735237481713       0.2966491134832703       0.3439847245211903       0.3882498608964013       0.4409071668635003       0.49932098503890543      0.561185573240311        0.6243639015472566       0.6872295973353258       0.7487076836306663       0.8083637648414296
3.171812653017053         0.4642886747606609       0.10006455229089868      0.25542425754673465      0.3051429697637959       0.352076665135832        0.40807341113563794      0.4703337322174325       0.5363412017288677       0.6037746627353733       0.670876176840075        0.7364871644951546       0.800142522356646
3.2783198502220277        0.39225756979464277      0.1002282592414878       0.2966706906408633       0.3443063155481636       0.38901912426218616      0.44164658024518116      0.49944143405203084      0.5602771017602324       0.6222005654553087       0.6837301664095011       0.7438844849446857       0.8022627410657149
3.270996070131202         0.4481781684869521       0.10006556149989843      0.26201747917010515      0.3118676090464493       0.3591154091763999       0.41478022816626847      0.47591315365699727      0.540235439327796        0.6056707595445351       0.6706564242452341       0.7341618523642004       0.7957706970576823
3.3445910848386626        0.44400585208158094      0.10003957574620068      0.2544337665437639       0.30476298428984655      0.3525069589115958       0.4083230344135278       0.46924593436356515      0.5331257264124606       0.5980086823971539       0.6624200387934273       0.7253820238636005       0.7864917820063421
0.8312013574431574        0.5559714951188168       0.10038156021706605      1.3190273442070874       1.6250097876057674       1.814480236370699        1.9567360006668648       2.0673688649801565       2.158682620284001        2.2385083364466922       2.3107122174641437       2.377542858229037        2.439961865101646
1.0454063983992519        0.5161587252427086       0.10016642397631577      0.8105993036976038       1.1385544732826565       1.3481721067324075       1.5070172000033801       1.6321913645507882       1.7364111666293878       1.8279610831012334       1.9110268146745375       1.988071250849831        2.0601289260880518
0.5556526970986869        0.8314145056510349       0.10039282388922291      1.3189344250741397       1.6248419588258567       1.8137766594530893       1.954848149396752        2.0637493268452443       2.1529371312730725       2.2303980825193066       2.300161857161558        2.364626127390765        2.4248740900113703
0.70697118739276          0.7072423489840459       0.10043505394458062      1.319102251229622        1.6249908493549143       1.8141202283235012       1.9557123138015864       2.0654686471131396       2.15577593137407         2.2345280114413257       2.305644231033944        2.3714237414823387       2.4328766095898087
0.735812080360247         0.8556673291938999       0.10020897144719457      0.908047124093325        1.2356799771918596       1.4419192081947232       1.5968092218231826       1.717551821214662        1.8172047884421727       1.9042140620224504       1.9828493738608155       2.0556502671959533       2.1237441667783115
0.9161401403828991        0.7119468244927101       0.100165399423002        0.8247110049060639       1.1526767960745916       1.3614281955212784       1.5190743776086328       1.6429161695838455       1.7457902122667626       1.83602421094168         1.9178120664520615       1.9936317261934657       2.064553525991608
0.3830428819802913        0.9237305616705731       0.10045216156684382      1.318839705336659        1.6247576223564935       1.8135957564217875       1.9543101164402608       2.0625146125024902       2.1506946137715883       2.2269228303914317       2.295359756692964        2.358522334500258        2.4175774756553023
0.3588396515940513        1.0993305221476763       0.10008648320859281      0.8344988633517377       1.162473644896609        1.3703196405956553       1.5259979959292582       1.6467065435728505       1.7455070573268439       1.8310550051283587       1.9079510703928124       1.9790333505824405       2.04562804758501
0.547624663973361         1.0311084274166002       0.10012378746842883      0.8068633266514803       1.1344429522720338       1.3429380842129965       1.4994919229522574       1.621461518088351        1.7218259270214065       1.8091379645544976       1.887866263686267        1.9607329002100775       2.028984067633696
-3.2783960944074924       6.392242338843796        0.10017141878797771      0.2966644330746397       0.3443004314432309       0.3890128738305922       0.44163956619280137      0.49943338116871083      0.5602674041285783       0.622187562895941        0.6837091104747527       0.7438454774609891       0.802187244879039
-3.3267936165785774       6.4442013542064585       0.1000713013474089       0.25727514647522604      0.30745903008775116      0.3550537923559079       0.4107912787092051       0.47170378016731         0.5356144354271094       0.6005440348744829       0.6649982188907507       0.7279847454264149       0.7890906472789867
-2.8000000000000003       6                        0.10024817939877677      0.29661165093199515      0.34257648239125543      0.38370548067486815      0.4338184860152106       0.4916200625480454       0.5547349239764655       0.620630956468683        0.6871320272390827       0.7527052477223027       0.8166335337748357
-2.7419165505918848       5.957720188063293        0.10005891491774911      0.2583185836126618       0.30652285569204524      0.3501104988082451       0.40321303596894614      0.4643897742401775       0.531120483153619        0.6007405462791192       0.6709703416965693       0.74020615906589         0.8076986907462773
-2.8077576611733686       6.0783960944933755       0.10017070963448516      0.29660910106485006      0.34247874168215314      0.38341687489626025      0.4333820780783024       0.4910980904963095       0.5541590796074372       0.6200106492345262       0.6864657913288886       0.7519871960454794       0.8158582563729608
-2.748352915419695        6.016325375351301        0.10007221077872178      0.2630419081997378       0.311019010589324        0.3543080240098874       0.40703407876071773      0.4677803354794142       0.53405116445193         0.603201115203912        0.6729629580934403       0.7417403488516277       0.8087860823736517
-8                        11.280000000000022       0.09999999999999999      0.10000000000560116      0.10000005097791824      0.10000570444532235      0.10005545359244228      0.10025890631447816      0.10080125825651298      0.10188948244664582      0.103712583945321        0.10639510971400183      0.10995751344656653
-7.803189178233187        11.162569631737435       0.09999999999999999      0.10000000002681442      0.10000014175053194      0.10001177927264694      0.1001033120587813       0.10044698395933628      0.10130125269535316      0.10293291086835198      0.1055581592365865       0.10930216072443626      0.11415574293145463
-8                        11.520000000000021       0.09999999999999999      0.10000000000179114      0.10000002319370387      0.1000031999902709       0.1000336805647588       0.10016751420799008      0.10054764536914562      0.1013464867322292       0.10273994623515557      0.10485681143928087      0.10774056850943087
-7.807149172393783        11.39057199712591        0.09999999999999999      0.10000000000877969      0.10000006552019576      0.10000672006181087      0.10006382892519657      0.10029396283460969      0.10090250487945285      0.10211925473684454      0.10415590617493296      0.10715385661130601      0.11113975226971153
8                         -4.080000000000013       0.10000000000000009      0.10000000039159518      0.10000101812233031      0.10005180800152669      0.10037137355639647      0.10136651953053422      0.10346089818959542      0.106970778922504        0.11200146589276562      0.11851036304263102      0.1262990822594338
7.8059696544301564        -4.199944612435265       0.10000000000000019      0.10000000089121576      0.10000167493230823      0.1000715958113307       0.10048433768516989      0.10171719056779216      0.10424358435047865      0.1084089392219071       0.1143223892260433       0.12193266095892542      0.13102115128870842
4.555652697101357         -2.16858549435075        0.10038114629105602      1.3190038776610156       1.6249342602968604       1.8140200424545343       1.95517946721293         2.06356631211738         2.1510915154311157       2.225344662092694        2.290209323277629        2.348100316605747        2.400284731246142
4.764479275646688         -2.1170927811625173      0.10016469077830527      0.8056621557085285       1.133326435367666        1.3419319306260435       1.4984261043065012       1.6196187589646966       1.717897408028619        1.8013516023502978       1.8742334423018205       1.9392327793544586       1.9977686017770828
4.567442938573423         -1.9911786228252462      0.10016407927092459      0.8317706431404271       1.1597789407256596       1.3681830041142018       1.524847903920252        1.6464267698815906       1.7452785761067242       1.8294659285331079       1.9032346396763484       1.9692729885352203       2.0289954764854397
3.5711995072635445        0.2857416083785241       0.10007133965408765      0.2535171928874614       0.30154424476803493      0.342936519320527        0.39054379784052423      0.4432711932140419       0.4995812585598685       0.5577777196297924       0.6163495359971564       0.6742096280895807       0.7308183829912779
-3.2                      6.4                      0.10017207277454121      0.29665070337422556      0.34398485869276374      0.38824838918968185      0.4409046833111177       0.4993178767541226       0.5611814929358114       0.6243569863121454       0.6872141718985885       0.7486719512269078       0.8082859082983255
-3.228196071965474        6.464105050339926        0.10006546968377206      0.25554097329161335      0.30561177549212865      0.35317503118949073      0.40948908418552193      0.4716060296190994       0.5371272647707249       0.603862986201499        0.6701640029248565       0.7349414292475646       0.7977510412163166
-2.8305665400858278       6.1533587907354645       0.10016469197709166      0.29660701779147464      0.34224800829644975      0.3827360483022504       0.43235968578076767      0.4898770599876174       0.552804087076342        0.6185326371572291       0.6848533287188033       0.7502228693709088       0.8139306790872869
-2.7486691768860556       6.120448423389462        0.10005963168500853      0.25425464100170175      0.3024833159623283       0.34601686342384735      0.39920627824316174      0.46061846012447577      0.5276631417349441       0.5976232806012584       0.6681900668565698       0.7377448510521738       0.8055352953901717
-3.0467828471837497       6.369492224658222        0.10020174028299682      0.29660594309465377      0.3427083814562149       0.3844610426533143       0.4353279337310318       0.49335101234719897      0.555939625513504        0.6205853609465969       0.6853111050836181       0.7487886929393269       0.8104569432096405
-2.9777389211408978       6.332565802247297        0.10017377043737537      0.2966042754282358       0.34220696246128013      0.38283893681453934      0.4327596970541408       0.49036372164930764      0.552998961092232        0.6180371033857956       0.6833653146421065       0.7475505123484688       0.8099735252635032
-2.9820525615015683       6.412275996739476        0.10005595466224464      0.2547106028081078       0.3028467722876162       0.34653474186695515      0.4000899443276496       0.4615593437110755       0.5281148829912451       0.5970126840109534       0.6660835785336268       0.7338677521174742       0.7997443744139644
-8                        11.76000000000002        0.09999999999999999      0.100000000000574        0.10000001076277885      0.10000183599239514      0.10002088141642883      0.10011028360849261      0.10037936841574624      0.10096816620738351      0.10203116472907248      0.10368893768813618      0.10599388414295419
-7.7844761850238084       11.636044479072172       0.09999999999999999      0.10000000000314949      0.1000000316086869       0.10000395009713371      0.10004046008458277      0.10019772579340626      0.10063849944862138      0.1015574259007107       0.10315141247748982      0.10556376919696195      0.10884153298435083
-8                        12                       0.09999999999999999      0.10000000000026402      0.10000000642323999      0.10000123949946536      0.10001468258489424      0.10007990889249752      0.10028170075075593      0.10073143398741445      0.1015558099268241       0.10285602719035063      0.10467946138952809
-7.835785861435899        11.84527081309532        0.10000000000000005      0.10000000000077883      0.10000001312861675      0.10000213783444256      0.10002395266836188      0.10012512732315784      0.10042663494806185      0.10108199171124363      0.10225859481566227      0.1040858631169181       0.10661816517411402
8                         -3.840000000000014       0.10000000000000016      0.10000000065416363      0.10000146310094622      0.1000675237039345       0.10046552099741644      0.10166297119531352      0.10411247152511764      0.10812773312598917      0.1137757151793705       0.12096692433251212      0.12945618042159251
7.806014011286462         -3.9599404410419456      0.10000000000000041      0.10000000161177207      0.10000254172762114      0.10009691273934386      0.10062594704684737      0.10214391763602602      0.10515513611347992      0.10999622800092469      0.11672438382283133      0.12522728103613023      0.13522707265043984
-3.121680149777851        6.392257569794618        0.10022728796444645      0.2966412930380617       0.3433882048354546       0.38650585619626715      0.43842970825133004      0.49682222333181686      0.559214879577201        0.6232728489634923       0.6871902691394233       0.7497638429625929       0.8104944821375083
-3.0539866076765785       6.443057036880658        0.10003821794161408      0.25463577685120514      0.3033802271839234       0.3483617209899731       0.4029735684902803       0.46490829943857037      0.5314282330444619       0.5999309373517612       0.6683946309037391       0.7354697540388455       0.8005933183587157
-3.1270632283314668       6.448778331498741        0.10006336768767729      0.2614552152105151       0.3104741073864824       0.35622298088339194      0.41118291612929375      0.47277294142247384      0.5384119305214204       0.6056850050924676       0.6727403877592406       0.7383485900806596       0.8020031936362528
-2.867519457008607        6.2223885980264          0.1001932772434579       0.2965902062157696       0.34201491350303         0.3820980729176841       0.43143810093391205      0.4887859295135693       0.5515648287737698       0.6171131540347541       0.6832104106819811       0.7483194175186346       0.8117454047251454
-2.790961202993886        6.22408456216305         0.10005482324475219      0.2546638826447594       0.3024833035296645       0.3452436759256195       0.3978410201062767       0.4588899691462532       0.5256727055790981       0.5953858835489768       0.6656859100671982       0.7349459362654085       0.8024247264386047
-2.917211525031739        6.282896939582466        0.10020235791941588      0.2965931550343046       0.34197014662842085      0.38203230222376366      0.4314206861485454       0.48877502160812386      0.5514520053617633       0.6167742393814457       0.6825476923786967       0.7472688528008186       0.8102729172794895
-2.8926637433830082       6.342356481893959        0.10005134807904399      0.2582642204549228       0.30576329056868157      0.3481092049565533       0.400385046248609        0.4610506223482554       0.5272713394274429       0.5962143814330676       0.6655815355163152       0.7338052672717916       0.8001982827775399
-2.8293234298875483       6.292860358896011        0.10004012902680383      0.25130117299189436      0.2990675373764912       0.34170412273468337      0.3943559542888177       0.4555844914029824       0.5225651277655708       0.5924339853778372       0.662834180872137        0.7321443697275994       0.7996395149930651
-4.831201357423019        8.444028504851078        0.10035890994233813      1.318962496203893        1.6248643241368421       1.8136477735906285       1.954079633438576        2.061374945651407        2.1475439811377703       2.220238417625777        2.2833535134270555       2.3392973460369464       2.3893266184273294
-4.923583649734446        8.616603023038522        0.10035231998018704      1.3190188536509881       1.6249055839578006       1.8136495016046597       1.9539556872967638       2.0610172198609757       2.1468503911389654       2.2191186760982182       2.281725478342293        2.337081416511618        2.386440409766417
-5.043944717871558        8.459057788982536        0.10014451889616645      0.7863776687735003       1.1136866148182063       1.3224424641903243       1.4787425978103454       1.599419117647287        1.696876758155584        1.779243416641924        1.850792381625037        1.914218654356304        1.9709344302912937
-7.761194029850746        12.000000000000002       0.09999999999999999      0.10000000000085603      0.10000001358270437      0.10000213472907109      0.10002358778256414      0.10012185303878463      0.10041142121400841      0.10103581094037646      0.10214896520831838      0.10386825419606548      0.10624045796725544
8                         -3.600000000000014       0.10000000000000024      0.1000000009665366       0.10000192584183691      0.10008251004847331      0.10055206651999334      0.10192809719854985      0.10468306187704964      0.10912428360450573      0.11528461500179715      0.12303542871829092      0.13209482165655753
7.80604572729897          -3.7199841798178626      0.10000000000000055      0.10000000257298157      0.10000352892608162      0.10012293919162317      0.10076521322588229      0.10255015525409301      0.10600200470130382      0.11144316099909095      0.11888244522001844      0.1281543505972458       0.138932747319335
-4.706971187392638        8.292757651015833        0.1004999046157357       1.3190435927890691       1.6249253134023662       1.8138013399902249       1.9544877461028622       2.062203592284864        2.1489224867675945       2.222268652366496        2.286127786944953        2.3429077562305713       2.393869369945122
-4.89131509843737         8.248349643855681        0.10013825984921494      0.8107004786766572       1.1383471636961824       1.3467065848946662       1.5027686630225936       1.6233582978255512       1.7209146983298738       1.8035575073008443       1.87554238552166         1.9395531588427353       1.9970006367855355
-4.9806058470585          8.80400976372615         0.10038466435166826      1.3191028867624166       1.624963395158033        1.81368766009869         1.953936040164866        2.060879418085994        2.146525837701654        2.2185389547688343       2.280825935723997        2.335799410798748        2.384712141704675
-5.1301328824367705       8.695286973874655        0.10015907855788701      0.7992443668600763       1.1267865119002554       1.335287994391094        1.4912631551303546       1.6114974975794516       1.7084241141495544       1.790184955962615        1.861057203857318        1.9237340580319702       1.9796226112719146
-7.522388059701489        12                       0.09999999999999999      0.10000000000456744      0.10000004247943388      0.10000487570911436      0.10004788436582586      0.10022538199300783      0.10070226352648375      0.10166438264931525      0.1032832206670154       0.10567251111302511      0.10885170965747766
-7.6332590923049395       11.830309586404406       0.10000000000000005      0.10000000000352023      0.10000003488710674      0.10000426159525598      0.1000430990044467       0.100208144053396        0.10066439242525459      0.10160535372049671      0.10322099010721131      0.10564552280817825      0.10891639070749524
8                         -3.3600000000000136      0.10000000000000031      0.10000000125800086      0.10000231629181215      0.10009438546288722      0.10061883509202356      0.10212859455095301      0.1051080497617893       0.10985770927162765      0.11638488974181481      0.12453289875015842      0.1339946609522796
7.806053585683958         -3.4800428851755822      0.10000000000000085      0.1000000036119153       0.10000447097938618      0.10014590875894118      0.10088399473685548      0.10288811960483035      0.10669358275919717      0.11260780067496758      0.12060031988532137      0.1304644535392313       0.1418385919274636
-4.555652697144229        8.168585494379402        0.1004349613697112       1.319162218744685        1.6250411490633592       1.8141092418113247       1.9552569667689332       2.063637002745782        2.1511569160236106       2.225403955438323        2.290259496031622        2.348135851130119        2.400296864648179
-4.769393713079099        8.159184275060342        0.10013744685787192      0.8777848158304821       1.2057694066011064       1.4126850694792703       1.5675633543014804       1.6870915468037282       1.7838023113396317       1.8658178484908594       1.9373662391448467       2.001105051055696        2.0584314372707015
-5                        9                        0.10036569344713556      1.319028019302409        1.62489738731898         1.813613844123694        1.9538414563896036       2.0607310230938647       2.14628264781937         2.218155906674278        2.2802583281872946       2.335003251540006        2.383643412709386
-5.155907398377591        8.926135989820166        0.10014637558602359      0.8296188589395452       1.157569018333824        1.3654549714736512       1.5208047497874608       1.6403373073352012       1.7365476434897482       1.8175927334614201       1.8877433321124621       1.9496822767453332       2.0048089020848736
-7.283582089552233        12                       0.10000000000000002      0.10000000002368335      0.10000013546886326      0.10001148221427847      0.10010034775523062      0.10043034501170663      0.10123703007810358      0.10275265417951061      0.10514719979584279      0.10850396909748179      0.1127861073829069
-7.406162844012729        11.813124428473508       0.09999999999999999      0.10000000001941323      0.1000001134915882       0.10001005213362245      0.10009002945502506      0.10039508491405336      0.10116168393729504      0.10263544514346558      0.10501580346940854      0.10841732073292497      0.1128290025533127
8                         -3.1200000000000134      0.10000000000000053      0.10000000143636967      0.10000254118012981      0.1001009735577912       0.10065528183339421      0.1022367277536872       0.10533516534177993      0.11024683623724858      0.1169653989637739       0.12531951993195062      0.13498935066124104
7.806021863863195         -3.2400437211873427      0.10000000000000119      0.10000000444030643      0.10000515882590481      0.1001618159189233       0.10096436225915652      0.10311295997399823      0.10714794655364034      0.11336553603122669      0.12170966843589935      0.13194762016244263      0.1436961449831893
-4.3830428820684          8.076269438365964        0.10038484290145422      1.3189995256002085       1.6250069981038535       1.814484907128829        1.956374905185983        2.0656850534851663       2.154249208814521        2.2296274807522116       2.295709559120248        2.354917180933714        2.4085105566417666
-4.576419132256011        8.0158661606698          0.10019439175240241      0.8757011924575892       1.2037098382340845       1.41099846424387         1.5665997451929579       1.687100578876978        1.7849409154625075       1.8681981611101244       1.9411001856350132       2.0063133772109776       2.0652376467868745
-4.980643924509411        9.195799625440857        0.10051101562163467      1.3191429913367685       1.6249861017423115       1.8137049921739437       1.9539240945495058       2.0607931019526085       2.1463023160879735       2.2181068936946997       2.2801140511009415       2.334738134809588        2.3832322976574467
-5.132888155629997        9.192265971843241        0.10015666402255781      0.8532009029514248       1.1811930100631576       1.388523876500593        1.5433516231541862       1.6623434850624772       1.7580244990035097       1.838553170435844        1.9081915623806578       1.9696136428248268       2.0242133007909797
-7.044776119402979        12                       0.10000000000000005      0.10000000011581982      0.10000041803458788      0.100026359148867        0.1002053862740947       0.10080508231638556      0.10214535020549108      0.10449586265087978      0.10799288514357148      0.11265509505593667      0.11836142953769783
-7.1694559307102175       11.807702348829315       0.10000000000000005      0.10000000010259953      0.10000036710381209      0.10002377662779238      0.1001887649487087       0.10075385812657962      0.10204687080986775      0.10436152218634888      0.10787467178223915      0.11264355588438242      0.11857395217501444
8                         -2.880000000000013       0.10000000000000042      0.10000000143445519      0.10000254066050877      0.10010096913039834      0.1006552696386752       0.10223670710716286      0.10533513758507529      0.11024680347458943      0.11696536302390177      0.12531948214250185      0.13498931184470572
7.805970165531569         -2.99999581170658        0.10000000000000163      0.1000000047564664       0.10000541214951132      0.10016753076009192      0.10099290573520027      0.10319214274856615      0.10730695683367424      0.11362941723178975      0.12209455344887009      0.1324607190719241       0.1443373903979428
-4.195799625594508        8.019356075521268        0.10037147453910215      1.3190450006356422       1.6251967310712119       1.815249924648333        1.9580535498002436       2.068427999304189        2.158154613702553        2.2347890640166748       2.302237835600491        2.3629282984507873       2.418101778734768
-4.372350116739954        7.895900774575539        0.10014423145942562      0.8122631340876564       1.140251773700763        1.3496597193544682       1.5077030691983557       1.6308619829268072       1.7313756755160525       1.8172749836002569       1.8928248730215265       1.9607299139566157       2.022396405474883
-4.923730561690251        9.38304288193283         0.10038126553908742      1.3190281794278351       1.6249066314772354       1.8136271841595297       1.9538479483922724       2.0607092907278184       2.1462015539523276       2.2179789322062575       2.279949443073081        2.334528484979996        2.3829697003572354
-5.102358310343764        9.337327242864069        0.10015669574857246      0.8437702270134039       1.1717085845299013       1.3792525448087494       1.5342768686997017       1.653462285254044        1.7493119774712704       1.829978506953667        1.8997268301600256       1.9612353445373187       2.015900583101051
-6.805970149253724        12                       0.10000000000000016      0.10000000052935713      0.10000123204050602      0.10005825436799297      0.10040496582676528      0.10145436247419404      0.10360860168331226      0.10714620308523333      0.11212382439875702      0.11845641307146366      0.1259163002109294
-6.9300333847109          11.806680638353162       0.10000000000000019      0.1000000005075764       0.10000113920234298      0.1000544219696662       0.10038330640262734      0.10139671925438566      0.10351831932703681      0.10706493729152479      0.11214246133050833      0.11870609957803867      0.12654832438164476
8                         -2.640000000000013       0.10000000000000019      0.10000000125460061      0.10000231525948704      0.10009437593518809      0.1006188075770945       0.10212854639276829      0.10510798358099342      0.10985763004684074      0.11638480209839779      0.12453280621074465      0.13399456571879878
7.805933068148609         -2.759964266500296       0.10000000000000075      0.10000000443137617      0.10000515917476054      0.10016185369918186      0.10096457650807152      0.10311357276765386      0.10714918678631409      0.1133676037832514       0.12171271117519543      0.13195173654325146      0.1437013976838769
-4                        8                        0.10038537915828279      1.3189456627375655       1.6253008774139095       1.8159779557163092       1.9596651706917785       2.071041882624105        2.1618891529661526       2.2397843543061073       2.308644404515438        2.3708839045312433       2.427702113294351
-4.126332133455464        7.847200094492696        0.10016031281232497      0.8261465708773631       1.1545431675303914       1.3645636865401265       1.523606244594233        1.6478973913632473       1.749671941270307        1.8369825537094202       1.9141142488466734       1.9837675034578692       2.047310407480142
-4.831414505686813        9.55565269704515         0.10039640796817247      1.3190672356740771       1.624935366241127        1.8136525453961359       1.953870225136886        2.0607285775991637       2.146217555852624        2.217992753094816        2.2799651007049024       2.3345522026049954       2.3830072369251383
-5.00469786497206         9.585400347945212        0.10014142666993193      0.8182105016025029       1.1460449636278183       1.3541691088935641       1.5097341575959164       1.6294592886742778       1.7257995932502832       1.806898255093391        1.8770308739560944       1.938888286986036        1.9938731606783306
-6.567164179104468        12                       0.10000000000000063      0.10000000224382198      0.10000343730676768      0.10012326154190576      0.10076529958328943      0.102524414362181        0.10585648335565172      0.11099690842107497      0.11786729742808195      0.12624035014260557      0.1357694303048804
-6.69001949826719         11.806863597239001       0.10000000000000071      0.10000000233434757      0.10000335312638521      0.10011944794546966      0.10074683602974042      0.10248910589428413      0.10584233229047042      0.11109466770284325      0.11821943497874667      0.12702365258691187      0.13716681965509225
8                         -2.400000000000013       0.10000000000000013      0.10000000096529615      0.10000192521191324      0.10008250251604854      0.10055204169214071      0.10192804970056546      0.10468299268238968      0.10912419750658676      0.11528451737708828      0.12303532417934913      0.13209471319651023
7.805920195276549         -2.5199716095212743      0.10000000000000044      0.10000000360665261      0.10000447220333242      0.10014596410678177      0.10088429902949562      0.10288898965049913      0.10669535265654374      0.11261076855071149      0.12060470964606267      0.13047041818020258      0.1418462302877942
-0.38304288196341046      5.076269438322426        0.10038412508267851      1.3190630550301128       1.6249350510402785       1.813747880934087        1.9544461940345856       2.0626404710890065       2.1508134782749284       2.2270363721891324       2.295468886000363        2.3586275148895313       2.417678902935253
-0.5556526971324366       5.168585494371522        0.10055396716645104      1.3191206084935798       1.6249794276631044       1.8139048891377245       1.9549670428902564       2.0638643142618025       2.15304953609091         2.230508097929494        2.3002693722036796       2.3647309891765596       2.424975702585152
-0.5895684787225293       5.038587826388374        0.10017321066008789      0.9100233796167178       1.2376202367296496       1.4436338090715861       1.5980041829272178       1.717894622835063        1.8164237860921202       1.902131560194856        1.9794046049081317       2.0508851922231974       2.1177724891573546
-0.7069711874417617       5.292757651064937        0.10036954179799339      1.3189952200566495       1.6249193898807275       1.8140557496795968       1.9556539792967873       2.0654128840614923       2.1557217065610903       2.234474984616532        2.305592039243109        2.371371564944134        2.43282290575025
-0.7170973223602713       5.096363660392245        0.10014098530433284      0.8417642776132492       1.1697244741873856       1.3776553937988474       1.5340000458293004       1.6561147918684036       1.75699097140167         1.8450870068503773       1.924716695539708        1.9984620065410696       2.067475489896951
-3.8040097637365244       8.019394152939425        0.10044933929893318      1.3190412354684584       1.6255218506461606       1.81657629096481         1.9608020900974217       2.0728639318780857       2.1645917672224817       2.2435936575538995       2.313770182958317        2.3774919154426906       2.435891136110946
-3.887153968985225        7.846975397063687        0.10016617043973841      0.8291687731888963       1.1578944452716617       1.3686288459075284       1.5286136735592926       1.653975533102326        1.7569952241882485       1.8457653541068522       1.9245694525601726       1.9960732505419954       2.0615775494384994
-4.707242349026325        9.706971187350462        0.10055906076100711      1.3191204381623263       1.6249674744312503       1.813687244111839        1.953904587505727        2.0607666055287814       2.146264322108723        2.2180577685023697       2.2800628277005055       2.3346998729238115       2.3832198374269664
-4.827481692708322        9.767862082796315        0.10018017598960482      0.9070628665275333       1.2346931253521667       1.4405872639579125       1.594146110916005        1.711919771715379        1.8064998164134523       1.8860529492801272       1.9548277602191448       2.015481002771002        2.069390427626843
-6.328358208955212        12                       0.10000000000000216      0.10000000874929922      0.10000900519107543      0.10024857077857367      0.10138146275077901      0.10419923835072038      0.10914840544887495      0.11634770302382942      0.1255272979140232       0.1362870568656684       0.14816227084199327
-6.449734885976799        11.807111230040016       0.10000000000000243      0.10000000992801876      0.10000929798142653      0.10025044163715542      0.10139193812147244      0.10425544769920671      0.10934673892929182      0.11684618564599582      0.12652788649810764      0.13801080337082508      0.15081639814251013
8                         -2.1600000000000126      0.10000000000000007      0.10000000065530179      0.10000146316235477      0.10006752174835228      0.10046551007300075      0.1016629442049967       0.10411242609704115      0.10812767126339534      0.11377564098155342      0.12096684225273541      0.12945609360060803
7.805905930030545         -2.28001359601637        0.10000000000000027      0.10000000257703967      0.10000353108786382      0.10012299306629353      0.10076549395670913      0.10255095376128488      0.10600363876237039      0.11144592402079016      0.1188865656879632       0.12815999186909358      0.13894002017709448
-0.1957996254194227       5.019356075486308        0.10034454941668887      1.3190205594023539       1.624908647772513        1.8136737015111946       1.954169204964222        2.0619155959710755       2.1493954221342033       2.2247356176270134       2.2921991596699227       2.354399505194132        2.4125717072199877
-0.37284472085378506      4.891895510190293        0.10013313839451905      0.8024711538937436       1.1300998448126995       1.3386225054172234       1.4949666698301733       1.6163940130692593       1.7158995645766242       1.8021209436772765       1.879662152005299        1.9513672241004725       2.018563842490025
-0.8312013574851066       5.4440285049438994       0.10039196095307086      1.3190372967093666       1.6250123199898934       1.8144788419736904       1.9567326425444278       2.067364303166108        2.1586773195722193       2.238502327468586        2.3107049125126116       2.377532667620948        2.4399454659478956
-0.923421122681772        5.28868617765319         0.10013629845962124      0.8112247674161317       1.1390659958064973       1.3481176709485687       1.5060744380431388       1.6302554619721012       1.7334657330407615       1.8240220393679094       1.9061172540206732       1.9822298058075638       2.0534286889258504
-3.6166030229975954       8.076416350282544        0.10045063976353637      1.3190057005478197       1.625464486698373        1.8164579157896636       1.9606944429838675       2.07297211874664         2.165200434101853        2.245009845412252        2.316251221929833        2.3812217524539756       2.4409714082472553
-3.6802846717678754       7.92287865406807         0.10023000389472891      0.921748344868947        1.2499751123180964       1.4583054378189797       1.616257772769351        1.7398569594509024       1.8415765303180103       1.929543505148888        2.0079616047046334       2.079388533540364        2.1450206274995005
-4.55597149514254         9.831201357427288        0.10036565761805094      1.3189799676221665       1.6248720848059575       1.813597575324802        1.9538224700630784       2.0606912469343035       2.146204468568168        2.21802994864606         2.280089173578239        2.334804163271981        2.3834217185175306
-4.74992659047162         9.87612667647898         0.10014777672992074      0.8426336026477258       1.1705758754491844       1.3781478844827555       1.5331972832182084       1.6524084467365652       1.7482894390262909       1.829003310109025        1.8988278552837807       1.9604488023459334       2.0152573724273535
-6.0895522388059575       12                       0.10000000000000638      0.10000003109080478      0.10002198353374481      0.10047558554760798      0.10237490093490557      0.10668122085170056      0.11373382413673687      0.12344874253955741      0.13531843583679953      0.1487542333222743       0.1631881169468864
-6.209845581933561        11.807117222327074       0.1000000000000096       0.10000003862172337      0.10002405403948443      0.10049859640589982      0.10247090815934166      0.10695732518932947      0.1143675232556124       0.12467617521213457      0.13739964989848394      0.15194460001041932      0.16770632740749633
8                         -1.9200000000000124      0.10000000000000005      0.10000000039318528      0.10000101854543701      0.10005181039598161      0.10037137597223288      0.10136651541459034      0.10346088245807959      0.10697075012216745      0.11200142583707907      0.11851031512309086      0.12629902926210348
7.805918009207748         -2.040048099469606       0.10000000000000019      0.10000000161860444      0.10000254370711638      0.10009694632679648      0.1006261090882221       0.10214437136503941      0.10515606870545717      0.10999782118505406      0.1167267870554445       0.1252306082279531       0.13523140607205889
0                         5                        0.10040932565535976      1.3188287557195246       1.6247372581554196       1.813507970016681        1.9539499211826057       2.061552573539793        2.148793386415327        2.223818449879876        2.2909303522243136       2.3527804656510214       2.410630675318408
-0.09414969591797041      4.833015309719176        0.10012023827077131      0.7986525259656098       1.1261528768779672       1.33468270866829         1.4908735989630502       1.6118845707744736       1.7106914948206289       1.7959918988066808       1.8725117774407993       1.9432094178140937       2.009490348556407
-0.9235836497845218       5.616603023159152        0.10054917773579257      1.3191106724813855       1.6251679042068534       1.8150652659299003       1.9579970112042864       2.06936905004131         2.1614128805840207       2.241940703381936        2.3148237739728033       2.38230570724183         2.44532046757431
-1.024661993969308        5.526667577233522        0.1001728854531383       0.9075319755952794       1.2353922308848693       1.442593485585277        1.5991954865559952       1.7220767753792896       1.8240993864273503       1.9135806376813478       1.9946912910007526       2.0698707826851774       2.1401379346368956
-3.4440285048735095       8.168798642561976        0.10042994045461458      1.3190465692717273       1.625322222232219        1.8158521721977736       1.9595921976455541       2.0715900330620447       2.163850255577325        2.2440182156365815       2.3158797362117194       2.381650081368165        2.442299806160504
-3.4704385580364017       7.969751454804628        0.10017539970440124      0.8295700040056939       1.1582249714257744       1.3688461525459765       1.5289262361735771       1.6548762766598484       1.7591361602655204       1.8498305665129988       1.9311203137225574       2.005502062000446        2.0740948183736543
-4.383396976826513        9.923583649790471        0.10035369401084707      1.319035605092684        1.624916018238446        1.813638480530049        1.9538623246429967       2.06073627615899         2.1462668322424574       2.218128804668464        2.280248545185694        2.3350491040039327       2.3837724449901674
[truncated: 3,862,734 more chars]
