# Supplementary material
Source: ML conference proceedings conference paper supplement (https://proceedings.neurips.cc/paper_files/paper/2022/hash/7f970edb14104b81e70e3b03e1f5214f-Abstract.html)
Supplement: Supplementary file 1 [file 7f970edb14104b81e70e3b03e1f5214f-Supplemental-Conference.zip › code/data/case2_airfoil.txt]

% Version:            COMSOL 5.3.1.201
% x                       y                        u (m/s)                  v (m/s)                  p (Pa)
0.9827081272760465        0.003424216271653725     0.536123656904281        -0.08651206951514938     1.2740788885199237
0.9829004706529517        0.0033931786138173188    0.5345839180954544       -0.08626360821063776     1.2775366233036651
0.9828344509183177        0.0035859714622068968    0.535590646146516        -0.0849678516145055      1.2758782508273192
0.9831081982512866        0.003359658467587        0.5329025897504361       -0.0859923013874642      1.281118538420151
0.9830378405572641        0.0035589433015447837    0.5339714274713474       -0.08464338025589173     1.2794701919834068
0.9905861798243759        0.002169795616077899     0.4550515644831942       -0.07049485850720462     1.503231043366294
0.9907595066529282        0.0021429444717843216    0.45262668511472864      -0.07011923806477914     1.5104913469691272
0.9906979580552466        0.0023162381082888965    0.45422619485581356      -0.06807667999521776     1.5066547420585479
0.9825016458330864        0.003457535330928246     0.5377586824729963       -0.0867758766543482      1.270386091048554
0.9826332404896374        0.0036240681002324554    0.5372053449312516       -0.08519979673100704     1.2722390345428598
0.9833373840495885        0.003322675700084883     0.5310250488079277       -0.08568933046571447     1.2850771809094599
0.9832582779125012        0.0035375336635342625    0.5322182488459272       -0.08422614841203756     1.2833009374634408
0.9903972844099774        0.0021990585874872657    0.4576478036880052       -0.07089709639107446     1.4959722850439874
0.9905157161066773        0.002350545972996488     0.45677289707172447      -0.06842836038247418     1.4991624074505274
0.9901887349709362        0.0022313662869173486    0.46046002090420995      -0.07133259384541533     1.4883269566798527
0.9903190703877183        0.0023940473519810466    0.4595002111815056       -0.06871909566689988     1.4915046593674817
0.9909434430243377        0.0021144497367753348    0.4500073864351941       -0.06971346600456214     1.5183410977265017
0.9908799939611233        0.002292425931875988     0.4516854881544388       -0.0675791615794199      1.5144137170690763
0.9822738349176441        0.00349429623925098      0.53954162367333         -0.08706370040724361     1.2661371750386012
0.9824178008414156        0.003672158580389369     0.5389347023872605       -0.08539166085495287     1.2682132957233911
0.9835902446736187        0.003281872623549441     0.528925252251522        -0.0853504958601024      1.289384236720589
0.9835014646539523        0.0035166610552327068    0.5302676346269449       -0.08373633473706722     1.2874347257529564
0.9899584865625091        0.0022670355095626635    0.46350017384743314      -0.07180414375314824     1.4807060944519292
0.9901021762459754        0.002443677904991566     0.4624549836300314       -0.06901672077961024     1.483693200155943
0.9911465174462274        0.002082990206533908     0.447059298175246        -0.06925676321149585     1.5276683695702309
0.9910758595369537        0.002274269422155215     0.4489382839604447       -0.06693038463001046     1.5232191716498578
0.9820224912014686        0.00353485453861903      0.5414836482087226       -0.08737663157733938     1.2612136236181521
0.9821808762771015        0.003727260049123644     0.5408196942469825       -0.08558550721181056     1.263706293739837
0.9838692257259302        0.0032368546011781714    0.5265728496450667       -0.08497089666122663     1.2940696971257084
0.9837703251023786        0.0034948175780451563    0.5280842512091577       -0.08317429267422478     1.291935368867735
0.9894236270672567        0.0023498939429844063    0.4703091908634795       -0.07286543867668473     1.4670306521495513
0.9897042814693338        0.0023064160122466303    0.4667808277297511       -0.0723100785041652      1.4732664478312734
0.9895986969264335        0.0025598135488770733    0.46907677516766993      -0.06968861837699264     1.4684224441321556
0.9898627986808975        0.0024989337245167284    0.4656450526010411       -0.06933691910125366     1.4761374286713262
0.9913707211777136        0.002048257402642146     0.4437328410671631       -0.06874142924324837     1.5385637449221183
0.9912913883785865        0.002256733999614632     0.4458672504494345       -0.06616220300069466     1.533342838074429
0.9817451837531493        0.003579602498413146     0.5435951441167246       -0.08771910093076711     1.255488602548694
0.9819197513592092        0.0037890338363748602    0.5428729779298987       -0.08579082046480323     1.2584222679814003
0.9841770254391005        0.0031871862303029354    0.5239323734618022       -0.08454482715765599     1.2991767418981812
0.9840678192733018        0.00347139567386268      0.5256322365357052       -0.08253239290438079     1.296860191074719
0.9891137713817489        0.0023978956273816663    0.4741093185060248       -0.07342025445932471     1.4617797703708149
0.9893075171236001        0.002624468215798751     0.47274398710352017      -0.07010141951494155     1.4634228981639608
0.991618252662696         0.0020099107503900155    0.4399685477829734       -0.06815830405136047     1.5512595723271299
0.991529449032826         0.002238336988820157     0.44240397336771836      -0.06527260734875218     1.5450735505666067
0.9814392305267718        0.00362897290932638      0.5458908132698432       -0.08808287499677271     1.247991867568435
0.9816318161397781        0.0038574218274239854    0.5451068141854899       -0.08601411776470848     1.252546971867017
0.9845166207723427        0.0031323871312873945    0.5209619147550864       -0.08406546339684463     1.3047369363302481
0.9843970208823825        0.00344570432642691      0.5228709337227263       -0.08180194959511779     1.3022557624894768
0.9887716761032475        0.0024508917489971735    0.4781303957323459       -0.07417373013783228     1.4650691970978909
0.98898559152931          0.002701109550050991     0.4766802633043166       -0.0705031421277934      1.453874185500033
0.9918915390868399        0.0019675742392483223    0.4356950065735255       -0.0674961353610312      1.5661744977473375
0.9917927957026574        0.002218688903358206     0.4384797413140011       -0.06424250195290725     1.5588275590287053
0.9811016724218669        0.0036834432692031674    0.5483704930013099       -0.08850884295496592     1.2388606918550913
0.9813145136429267        0.00392926562306453      0.5475255695809659       -0.08628332038917864     1.243990108213092
0.9848912962038818        0.00307192730141995      0.517611543003003        -0.0835249830256543      1.310910426509384
0.9847601102051128        0.0034156298466146394    0.5197580019108664       -0.08098691437977455     1.3081085478056487
0.9883939867948155        0.0025094019646605273    0.48250338451123315      -0.07434261685023807     1.492164204472077
0.9886301705026967        0.0027857251945261003    0.4808268239483848       -0.07095580828918004     1.4694666241985714
0.9921932601774981        0.001920832735873802     0.43082482363019575      -0.06674212676218517     1.5838047863621318
0.9920837326018463        0.0021967686847136655    0.43401907028177583      -0.06306010247103704     1.5750403587613635
0.9807292446637543        0.003743540401275338     0.551086485368419        -0.08884777025660427     1.2222830801438709
0.9809640632222504        0.004015090617458693     0.5501867286113408       -0.08652869886230709     1.237716983355197
0.9803183452274878        0.00380984554945986      0.5539540762934031       -0.08969831523453335     1.1805900446995048
0.9805774234741693        0.004109792749280223     0.5531203703442631       -0.08679415656147559     1.2127525033205766
0.9853046754975809        0.0030052219888642155    0.5138220354106269       -0.08291290431061973     1.3176029690690774
0.9851551296375949        0.0033751871644085068    0.5162681964133683       -0.08013760189953134     1.3145379673534363
0.9857536923315243        0.002932765993347448     0.5095895345319018       -0.08223214189442818     1.3246145486259109
0.9855867010438161        0.003327040129275297     0.5123417685782742       -0.07921238053367428     1.3213431460046154
0.9862045386060296        0.0028600147885487004    0.5052113738380061       -0.08151695295831783     1.330618461522534
0.986036407413767         0.003269388460750363     0.5081046999256794       -0.07827855225918288     1.3285465293803573
0.9866522710785979        0.0027877660451325493    0.5007270045628638       -0.08082788577492958     1.3358788014847323
0.9864876796734113        0.0032032534055468544    0.5036859931706376       -0.0773768852676075      1.3339579158789012
0.9870969112549234        0.0027160162928137332    0.4961306395796284       -0.07995206724311711     1.3310144265579442
0.9869364812626676        0.0031301431893252917    0.49910509544229537      -0.07650417438800261     1.3421132092077686
0.9875384804921707        0.0026447620852746976    0.49131355464489307      -0.07969651961043249     1.3123460786592154
0.9873809811167308        0.0030505745796786097    0.4943361818156183       -0.07562677055088117     1.3306491162041796
0.9879770000000001        0.002574                 0.48684728077597367      -0.07698031877690369     1.3885489476835993
0.9878175298401252        0.00296538892698887      0.4892038454931222       -0.0744467090912388      1.3559889621570138
0.9882377216656743        0.002876908438097287     0.4848365981599297       -0.07179055806260003     1.4393635900812134
0.9925263744799504        0.0018692279134922781    0.4252489137149536       -0.06587649255142232     1.60446019929127
0.9924050707041523        0.00217261418613932      0.4289312569248294       -0.06169009650248792     1.5942201410356602
0.979865                  0.003883                 0.5571338984376341       -0.0887103745829244      1.2595616088951038
0.9801510607212098        0.004214456638566121     0.5566388259619791       -0.08681956402951559     1.2187886782346837
0.9928941483676024        0.001812253757747166     0.41883038824358687      -0.06488921995522795     1.6293297870112333
0.9927606238344578        0.0021480662821188406    0.4231049419068684       -0.06005431632696261     1.6167143304161102
0.9793795514797177        0.003959232009032639     0.5609307230390898       -0.08776843602213961     1.306498757798641
0.9796847568318408        0.004325653876226344     0.5602351270035676       -0.08548992956378355     1.2784492959049751
0.9985843126619856        0.0010150563495952777    0.2503590714546154       -0.03218928202536296     3.687041496551179
0.9988843154712702        9.76476209150357E-4      0.22944709421841758      -0.029493273000301374    4.305743901097459
0.9987648102295497        0.0012452580665358556    0.24706026597993325      -0.014720556527793678    3.847168029353813
0.9982537615094602        0.0010575649844946173    0.2696260425521954       -0.03466988646076482     3.2383733657018703
0.9984526717535771        0.0013096649047311855    0.2659798995881388       -0.01844126467488423     3.3710141581161692
0.9933005417365527        0.001749296816339006     0.4113868678944301       -0.06370860041454368     1.657823247560002
0.9931535773709593        0.0021211413503914862    0.4163895914883519       -0.05812234425732828     1.64473904334151
0.9978876625856965        0.0011046450366088366    0.287785476489344        -0.03699977980549167     2.901518845656686
0.9981085131655918        0.0013782276739466796    0.2838052546059386       -0.021820734283871396    3.0091694871598347
0.9974821930510819        0.0011567881202981958    0.3050631565534875       -0.03924897265589143     2.6379041336960944
0.9977267574650202        0.0014595181573417819    0.3010422429471444       -0.024703531379565807    2.724312290804267
0.9991551912394079        9.416417847568136E-4     0.20627144352202084      -0.0265184545175777      5.2232764654390875
0.9990477942736086        0.0011872034117073338    0.22690689660721694      -0.010360189685582775    4.493309126483219
0.9788487801354218        0.004042581250449837     0.5644317473318873       -0.0887155151152131      1.273216313959434
0.9791808062563201        0.0044441670442598525    0.5634102523979628       -0.08550744037413888     1.2779011158435483
0.993748813713217         0.001679852197587779     0.4026877858510319       -0.062468029750805176    1.6941570628663936
0.9935882402003339        0.002091679575060759     0.4085885309398644       -0.05580833393668159     1.6741565782800036
0.9970331767629581        0.0012145312844344851    0.3216508655057406       -0.04127889466859606     2.4267590361802336
0.9973041520447637        0.0015489122313709276    0.3175830440254508       -0.02741595574351721     2.500956862081418
0.9993997652917663        9.101897416520459E-4     0.1795701000607016       -0.023011563719958023    6.732501895367387
0.9993041928604214        0.0011359761471778816    0.20543650694598717      -0.005007325706219889    5.400952609994231
0.978268454502208         0.004133712208861854     0.5682128050155858       -0.08920760125299287     1.2539600912248963
0.9786320583495822        0.0045736935665963326    0.5670231135689812       -0.08583033151376951     1.2561250838408666
0.9942419169899761        0.0016034624814285816    0.39244028280057347      -0.06046416218391628     1.7243192488125942
0.9940683250636896        0.002057797582564968     0.39943391364399855      -0.052995895413373746    1.7231876554590888
0.9965376507531054        0.0012782555645497698    0.3373777875547794       -0.0437038905538105      2.2705507837768923
0.9968367587945117        0.0016480662216799328    0.3334854696326819       -0.030014745173593736    2.3090067921641455
0.995988835425983         0.0013488328116401968    0.35266170245394757      -0.04410954651365496     2.14495739025227
0.9963202837081504        0.0017570974159429437    0.3486809988414529       -0.03263951455683765     2.203008175934088
0.9947843351071204        0.0015194330945614346    0.37988630672126034      -0.06013443048611198     1.7671227602091246
0.9945951980450851        0.0020146203439234778    0.3885547646904464       -0.049584945331032075    1.732130351823544
0.995381                  0.001427                 0.3651419479494306       -0.05168792318827653     1.945900765104929
0.9951573746374897        0.0019514240539774145    0.3752744727371296       -0.044905623319233985    1.862212563544327
0.9957532536224378        0.0018606653935931278    0.36210878941418295      -0.03635493245916461     2.0274361258679328
0.9996205914937496        8.817916546249699E-4     0.14682000474968374      -0.018958252433685912    9.514472747817441
0.9995363531564655        0.0010912040297334081    0.18301776944631484      0.0016002364029635322    6.695874565668009
0.9776339480538397        0.004233351407010297     0.5722184443644978       -0.08986308620639509     1.2432416300797229
0.9780328480477525        0.004716241390788497     0.5709123744330932       -0.0862231845980672      1.2469658564391313
0.9998199757334599        8.561509881629789E-4     0.10770009002300908      -0.012904703733569813    17.821938476097596
0.9997473194574239        0.0010530693315074812    0.16151686021149         0.00909923481900199      8.468656519142597
0.9769402023187228        0.0043422931978206285    0.5764584663434504       -0.09052210503705123     1.2335448308856347
0.9773768068150496        0.0048710005897500365    0.575057846542041        -0.08666095425828052     1.2369942639477964
1                         8.33E-4                  0.005837459657897569     -0.0032027711921186605   -0.5996475564368975
0.9999333419175855        0.001016425191491965     0.14997566331505394      0.0019534698397216765    11.965765261048958
0.976181686552287         0.004461406097216649     0.5809410419038538       -0.0912281170692484      1.224939282281286
0.9766575501058387        0.00503744778323989      0.5794585306878887       -0.08715492737109677     1.2284322842233808
1                         6.508951255509482E-4     -0.001459178883390681    -0.013355801669269312    -13.80763918285451
1.0001773453978118        7.239189275307395E-4     0.024213971841387124     -0.03747363970613063     -12.520522077585618
0.975342606343943         0.004593170367472103     0.5857265974624617       -0.09197787699065141     1.2165307875502145
0.9758671971583704        0.005217340393000704     0.5841279841060399       -0.08770344250112373     1.2201078734594477
1                         4.4911434228582937E-4    3.153006036672739E-4     -0.005665846241404944    -9.242444509003029
1.0001763716774081        5.371113457354349E-4     0.007250917261530153     -0.01679012790072104     -9.188854958041974
0.9744103305118           0.004739569535844275     0.5908420218922469       -0.09278634995483999     1.2081280496668692
0.9749937299705589        0.005419981863040116     0.5891125929929951       -0.08827673930453267     1.2118171707205698
1                         2.255317247514694E-4     -7.894700056070581E-5    -0.0020515892335375777   -7.83739742915461
1.0001865328333153        3.3034812335648556E-4    0.004268700909059962     -0.008120349988351762    -7.821130107821722
0.9733910148150648        0.004899636937750122     0.5962179995452757       -0.09361109313290701     1.19922706662084
0.9740299841353015        0.005644579790419404     0.5944058561654194       -0.08888847736810888     1.203704643353747
1                         -2.2073390995692478E-5   -9.446726669536431E-5    0.0012724013939171865    -7.440257268369703
1.0002002256906375        1.0045752226568406E-4    0.003593182159615456     -0.0017035081841854204   -7.202110910389776
0.9722765329698979        0.005074648677487348     0.6018367139791608       -0.0945693228447632      1.1886626657322088
0.9729756060447237        0.00589033569612022      0.5999703086093681       -0.08953854823831908     1.1942924472684366
1                         -2.842830314490448E-4    3.6069641376092497E-4    0.00503550873575645      -7.902383763751305
1.0002131849822549        -1.5289116712815485E-4   0.004252599835601474     0.0051434223724886605    -7.159431493096911
0.9845719479445237        -0.0031229467627510504   0.5186028322575978       0.08375905060789228      1.3075801280905046
0.9843026562932915        -0.00316643980468352     0.5209948652026002       0.08414538921654928      1.3029351125905901
0.9844742102717694        -0.0033827971905385445   0.5201915072249808       0.08184803475133762      1.3052225284649663
0.9840333646420593        -0.0032099328466159895   0.52334795434214         0.08452543472316647      1.2982989166733692
0.984205553454195         -0.0034260149441726335   0.5225516878348113       0.08226592391757097      1.3005838483429926
0.971058                  0.005266                 0.6077375631232493       -0.09520037144057218     1.1861365852419679
0.971845111608852         0.006171726672761478     0.6057821191880532       -0.09008603900236899     1.1870758897290086
0.984841239595756         -0.0030794537208185804   0.5161705324455673       0.08336622091466396      1.3122037701156741
0.9847429405456264        -0.0033401503926149064   0.5177933146325396       0.08141752223999106      1.3098536290564855
0.9853798228982205        -0.0029924676369536413   0.5111799619691542       0.08256032587363646      1.3214726334599198
0.9851105312469883        -0.003035960678886111    0.5136964827124104       0.08296660254331782      1.3168665416145053
0.9852824660245315        -0.003253784941259824    0.5128520603455787       0.0805351901576305       1.319214467264089
0.9850124885671424        -0.0032975544421619085   0.5153477440512954       0.08097583753257372      1.3144847439497929
1                         -5.545101846820817E-4    -0.001625850565345164    0.014350761923639382     -11.297942649143328
1.0002277084680913        -4.1560045089101394E-4   0.007353992456544446     0.01516705325611383      -7.890482823141155
0.983764072990827         -0.0032534258885484595   0.5256631325440362       0.0848993583189705       1.2936610592450726
0.9839366269701957        -0.003469585500343878    0.5248770878525361       0.08267461293823197      1.2959663447793106
0.9834947813395947        -0.0032969189304809287   0.5279415844373461       0.08526734743069914      1.289013308537505
0.9836675142332876        -0.00351327441855373     0.5271672169085072       0.08307584927410834      1.2913414454080867
0.9697981598117537        0.005462837441753055     0.6136215594196339       -0.09580849638407636     1.182225835892782
0.9706271655552806        0.006454062253298803     0.6116996762401645       -0.09048890857157034     1.1835872327063035
0.9856545933955276        -0.002948089711732056    0.508567752493031        0.08213783309386176      1.32594814464768
0.9855556733645262        -0.0032125749345584004   0.5102924490309367       0.08005402943844873      1.3240107804786474
1                         -8.33E-4                 0.006248015326408745     0.003470753548601006     -0.22107073025105595
1.0002480671878788        -6.814997715499971E-4    0.027155614545747258     0.03906571253245949      -9.974440663129302
0.9832254896883624        -0.0033404119724133982   0.5301846232172701       0.08562962827990121      1.2843592110887883
0.9833986535971159        -0.0035573853835465566   0.5294208411142395       0.0834660822206764       1.286688220160312
0.968438542912817         0.005675263997635116     0.6195797323696479       -0.09681758219571655     1.1724913156615666
0.9693247647242248        0.0067498265703396084    0.6176038449547727       -0.09118413845006489     1.1763772760625937
6                         1.8888888888888884       1.005841477636332        8.395320827316866E-4     1.0000694974749347
6                         2                        1                        0                        1.0001406128570638
5.926903071245803         1.9241386771382647       1.0038632698761576       -2.169303861285828E-5    1.0001269817086025
5.888888888888877         2                        1                        0                        1.0000888014581995
0.9859553237103201        -0.0028995190407447306   0.5056533025390552       0.08166944747010826      1.3303961871467804
0.9858460316508659        -0.003176475889174971    0.5075476113762091       0.07946049606023577      1.3283588888632172
0.9997136733084702        -8.697594128766326E-4    0.1256461251253429       0.01512727515325126      13.202547105851286
0.9998678092303626        -0.001120039167962439    0.17348131681138876      -0.005545803549882746    9.084926012589472
0.9993983667250548        -9.102393444560496E-4    0.1713087565769735       0.022085534220568134     6.949095069047144
0.9995709320301732        -0.0011684746114452428   0.1866658653189208       -0.009714424959815142    6.1746512584149285
0.9829561980371302        -0.003383905014345868    0.5323932051699931       0.0859863031620005       1.2796771602948087
0.9831299533430754        -0.0036036171716532918   0.531644820529813        0.08383316438335577      1.2820186431144496
0.9669712471961693        0.005904514292914366     0.6257089759572881       -0.09776335776617417     1.1634194680065657
0.9679212620144305        0.007067790812300752     0.6237056578590954       -0.09197302025854727     1.1671866440676206
6                         1.7777777777777768       1.0113656980094352       7.376534360683723E-4     1.0000129561870679
5.9162802556027465        1.8319906085106705       1.0087340810457297       -1.1586094820067654E-4   1.0000006541210278
5.777777777777766         2                        1                        0                        1.000047032269705
5.829188724935087         1.90010330889887         1.0052743195924607       -5.6802253498790206E-5   1.000063247014445
0.9862862342649726        -0.0028460739875336817   0.5023782531896923       0.08113156880651672      1.334513484906444
0.9861650565380966        -0.003151797888556701    0.5045204810056215       0.07865156522621419      1.3335944906212498
0.9866503538425282        -0.0027872653761913304   0.4986857202451936       0.08057012070755533      1.338622026144291
0.9865180763473265        -0.003123577819835891    0.5010880505637311       0.07773416664051296      1.3371981717276569
0.9990511471172224        -9.548163584081141E-4    0.2088140492092367       0.026721204871558702     4.990161776747961
0.9992505673603584        -0.0012278655047523643   0.21199274908211543      -5.117656169842553E-4    4.963194046057207
0.9826836360237339        -0.0034279262494030984   0.5345945224680145       0.08634195086701386      1.2747996818835463
0.9828579789129118        -0.0036551185137598725   0.5338748487364374       0.0841633019314853       1.277175882152825
0.9653474831014647        0.006158211208915344     0.632157461686517        -0.09874300919882584     1.154210145621559
0.9663932711872253        0.007415008719316866     0.6300393246771451       -0.0928044527712071      1.158973995165695
6                         1.6666666666666652       1.0162949950227478       5.347218863246279E-4     1.00000853102033
5.912941703701399         1.7224696907565908       1.0139601638257523       -1.7956338776310495E-4   0.9999885909936986
5.666666666666655         2                        1                        0                        1.000046343966268
5.714842084441584         1.909655550103695        1.0048449201111032       -2.8531926068204582E-5   1.000047078617498
0.9870510151840755        -0.002722554938831333    0.49451643892452335      0.0797619912134697       1.335955109027119
0.9869058792627032        -0.0030907639869177084   0.4971990735225191       0.07669332838060682      1.3454405758543775
0.9986687844822354        -0.0010039051314211713   0.23890978652205905      0.03066593291614786      3.926830074750558
0.9988954035405844        -0.0012983858048444704   0.23744513174250007      0.006962035859408986     4.055841651971324
0.9823869666952572        -0.003475841034300691    0.5369528025152146       0.08672236547180716      1.2693745084041599
0.9825729732798454        -0.0037149802402775232   0.5361919884960988       0.084460336638753        1.2720478507461734
0.9635811851061589        0.006434177622761479     0.6387718123753393       -0.09990433217705642     1.1433048064546183
0.9647206468284186        0.007798775473126834     0.6366384927714311       -0.09366615356841294     1.149225702388826
6                         1.5555555555555536       1.0204090057036732       2.702813201586053E-4     1.0000070547567261
5.911059637942687         1.6117963400214583       1.0185082614568512       -2.8150039909913266E-4   0.999969392384452
5.555555555555545         2                        1                        0                        1.00006554092151
5.607797990456478         1.9091715097923245       1.004920376107825        -1.861263387035257E-5    1.0000626516336502
0.9874918854929121        -0.002651350388889782    0.4896689165858932       0.07950247950578106      1.3149676000329602
0.9873315812593718        -0.003052918024045004    0.49275160554132574      0.07549380918908434      1.3334754865291492
0.9982455354848181        -0.0010582430087687491   0.26487157812538126      0.033985114603383056     3.286783686474287
0.9984989611571067        -0.0013805368547815501   0.2616827525790854       0.0128782540383137       3.420058656585151
0.9977788495243162        -0.0011181574436199381   0.28803620123349233      0.03699272634210358      2.860783920571686
0.9980592973463946        -0.0014728085327669193   0.2842066688057005       0.0177403368286141       2.969172089571185
0.9820605246732674        -0.0035285643789939106   0.5395027699016997       0.0871360393753876       1.2631179597473405
0.9822644321307122        -0.003784599159553774    0.5386737707887467       0.08474253031961658      1.2662185350479334
0.9616750000000001        0.006732                 0.645563344127328        -0.10046328193939193     1.1403849612412555
0.9628896176833838        0.008218885082037884     0.6435781583743205       -0.09448329880621924     1.1416987564196723
6                         1.444444444444442        1.0235646261786773       -5.113462411833792E-5    1.000006622737565
5.910749724189241         1.5008055235216045       1.0221874396975128       -4.082592581202611E-4    0.9999546156303184
5.444444444444434         2                        1                        0                        1.0000904690635184
5.498127115088522         1.9084584470823311       1.0050004822476917       -1.6389252865121208E-5   1.0000844979039023
0.9879770000000001        -0.002573                0.4846746997998606       0.07668303439492544      1.4140793949382522
0.9877983949621176        -0.003008141928209495    0.48743818393637534      0.07373335332984397      1.3631635426622326
0.9885103537501868        -0.0024903748309745544   0.4789677681561139       0.07378618879396183      1.4744893511657706
0.9883128928258991        -0.0029681978753711424   0.4822383961426174       0.07015388022010705      1.4382551771470349
0.9972649290269031        -0.0011841359790098372   0.30921541778562156      0.03961152192521144      2.5549780698992914
0.9975741269131007        -0.001575275165096644    0.3051371742767038       0.021892977354940783     2.644063313885827
0.981701322074643         -0.003586578853682343    0.542258905103497        0.08757420753262617      1.2552446419784304
0.9819263885070888        -0.0038640015910902004   0.5413561549889555       0.08502611799529902      1.2598053565559277
0.959524126887462         0.007065480581329039     0.652855084243543        -0.10114761748574402     1.1346581744354387
0.9608672304168282        0.008678205864151536     0.6507463737476805       -0.09493772632979584     1.1370181591355857
6                         1.3333333333333304       1.0255843869622168       -4.361035291507537E-4    1.0000085330580812
5.909887664329259         1.389472415901065        1.0248339288869384       -5.675868128015879E-4    0.999940580535707
5.333333333333323         2                        1                        0                        1.0001187420239055
5.388169555230881         1.9090074189979882       1.0050083052684775       -1.5036677092731171E-5   1.0001111005783174
0.9890955836177415        -0.0023997132077863796   0.47199421568246097      0.07322499131713797      1.4691482396920943
0.9888792497338115        -0.0029242825608699324   0.47644621214812993      0.06811101407969898      1.4636228624228742
0.9966972048776321        -0.0012570219760909558   0.32873353419276585      0.042511024065391624     2.337834124010082
0.9970389624577392        -0.001687995822827439    0.32467159540285895      0.025623697155974973     2.3911198783625633
0.9813060711627914        -0.003650415457618442    0.5452202768490921       0.08807966855062915      1.2457703204723092
0.9815546545371399        -0.003951885789232628    0.5442576214808873       0.08533156209703553      1.2510077678281464
0.9571965483183826        0.007426358333615303     0.6601317754019477       -0.10227729000467296     1.1219144900828995
0.9586603878522831        0.009201429417470314     0.6579618847093897       -0.09576785915600594     1.1287162639575163
6                         1.2222222222222188       1.026239200045527        -9.016183812666441E-4    1.0000115995521432
5.9097687218093675        1.2782949430395618       1.026235999968697        -7.581617288752691E-4    0.9999282438645541
5.2222222222222126        2                        1                        0                        1.000148861624805
5.2774974892669215        1.9093807346575742       1.0050239342222047       -1.4283591270323843E-5   1.0001401650024329
0.9904423451818328        -0.0021910779411720227   0.4546271504640855       0.07043437906445113      1.5023299299219672
0.9897377352811692        -0.00230023347278483     0.46401351657924206      0.0718558580674704       1.4781810500191266
0.990181919361055         -0.0028239708661835857   0.4609967177759753       0.06356536975860193      1.488358228507482
0.9895000424639724        -0.0028769112734871477   0.46934172626988874      0.06600201364107522      1.4658928606192558
0.9960708023768357        -0.0013374412622940979   0.34709117227302433      0.04334430811328913      2.1844366629338716
0.9964488618930534        -0.0018137357464508446   0.34294428467739085      0.029082669601277148     2.2386897050676677
0.9808711542554021        -0.0037206584792779315   0.5484405791542115       0.0884953945109291       1.2294491947624075
0.9811451018687524        -0.004049424342563578    0.5474108430565444       0.08565422917264863      1.2441033186142254
0.9546321052372119        0.00782396057454202      0.6675718921075742       -0.1038791906858166      1.1045174159391604
0.9562565674153599        0.009773680039197865     0.6654767431485319       -0.09670184054154539     1.1151575614206843
5.111111111111102         2                        1                        0                        1.0001796530161582
5.166582355840023         1.9095290044714746       1.005050247429095        -1.3639824459292301E-5   1.0001711079221378
6                         1.1111111111111072       1.0253023433101722       -0.001441528433964516    1.0000075211690618
5.909575160681516         1.1668890804431291       1.0261556980288615       -9.909078391759833E-4    0.999915166668449
6                         0.9999999999999956       1.0224288713520426       -0.002082121216455448    1.000011783997925
5.909610717823074         1.0556587707906486       1.0243194807811073       -0.001257434168161869    0.9999013643194082
0.995381                  -0.001426                0.3623267638240266       0.05126637105628921      1.940801584109827
0.9958008872861277        -0.001960283783363317    0.3593256222197856       0.03310611110304145      2.0404836656142518
0.9946343580537359        -0.0015416669789795824   0.38049101710343464      0.06017997979777387      1.778670926979902
0.9950890147246944        -0.002126702884855151    0.3761155299066549       0.041369982605282025     1.854636596399568
0.9912155430556895        -0.00207129701716965     0.44357274107272704      0.06871964431562598      1.5345732073957814
0.9909256449444137        -0.00275540100413341     0.4512177481684743       0.06080060150005368      1.515513520805681
0.9920419422862337        -0.001943274337883552    0.43073074948448425      0.06670614141454571      1.5763790466123153
0.9917322881930901        -0.002675682404500547    0.439775666269102        0.05755443705033869      1.5530524453833368
0.9938150939769311        -0.0016685843069232675   0.3984932496023299       0.06142000369681921      1.6943116491167152
0.9943110513401833        -0.0022994746755140715   0.39443547846451826      0.04576854349633644      1.7188995352171201
0.9929205618763595        -0.001807161875717946    0.415686337118576        0.06447583144377332      1.6332611520208815
0.9934791382766583        -0.002456392560804206    0.41104254442859517      0.04965962072566635      1.6633263330785095
0.9925897249625505        -0.002586214769766355    0.4265307681632909       0.05369918023094734      1.5990601283761645
0.9803925906122546        -0.0037979508442789237   0.5518292636658207       0.08944891929702715      1.1917589362418655
0.9806938337998206        -0.0041564449153919086   0.5508637354159892       0.08600331977595894      1.2207508426102311
0.951852                  0.008255                 0.6752032037145576       -0.10320087441348667     1.1115137589255806
0.9536341443948841        0.010400014904324248     0.6736137295403176       -0.09732851396580267     1.1080080735130127
4.999999999999991         2                        1                        0                        1.0002099189805111
5.055538481729797         1.9095748803059722       1.0050822552064196       -1.3711153314063339E-5   1.0002018807441406
6                         0.888888888888884        1.017315695662563        -0.002802551221295338    1.0000182555852595
5.909614552683306         0.9445035358538769       1.0203841334109096       -0.0015632659700538438   0.9998964368079922
6                         0.7777777777777724       1.009773224678246        -0.0035415187591389496   1.0000214438446902
5.90960327573402          0.8333686257872959       1.0140691960550432       -0.0018913768792971873   0.9999045756612018
0.9798660000000001        -0.003883                0.5555543659663523       0.08848685624886828      1.259815774264054
0.980197480651015         -0.004272169699157833    0.5549224795222659       0.08612024684657978      1.2247847968856973
0.9487570396193266        0.008720858872026949     0.6837075241720072       -0.10235402161192951     1.1105963735277828
0.9507722960938283        0.011098745172312338     0.6817660416718762       -0.09625136237033725     1.1120622582722446
4.88888888888888          2                        1                        0                        1.0002391943107907
4.944439213949478         1.9095871383687868       1.0051165960941597       -1.391038066019329E-5    1.0002319620064286
6                         0.6666666666666607       0.9998625762555774       -0.0041890926649707635   1.0000236741120614
5.909590387140575         0.7222385558313823       1.0052740571551002       -0.0021965325311510127   0.9999319940782428
6                         0.5555555555555491       0.9880547819698823       -0.004599860598893417    1.0000261447572634
5.909582077631391         0.6111154539995296       0.9942414035213442       -0.002414251872926914    0.9999837933263017
0.9792989676945459        -0.003972033342239187    0.5599466983083035       0.08759529705116632      1.3005202745140534
0.9796545916728145        -0.0043993653053929025   0.5590843867237466       0.0848225114252142       1.2763109241769426
0.9453807298197496        0.009229066952707508     0.6914633870234548       -0.10481168010710562     1.0885565994558175
0.947617310253217         0.011897111044418618     0.6894959162210959       -0.09673523549472383     1.1003301778977492
4.77777777777777          2                        1                        0                        1.0002670298786622
4.833331346720429         1.9095882633426047       1.0051524303660726       -1.4262941283082425E-5   1.0002608677213445
6                         0.44444444444443754      0.9752909169368639       -0.004623807352859606    1.0000306033630506
5.909579587804299         0.5000005721184055       0.9816766941276649       -0.002472766411908576    1.0000605776138762
6                         0.33333333333332593      0.9629235337445642       -0.0041491397508629764   1.0000377852183155
5.909579250277989         0.38888888760713164      0.9687558094765          -0.002310314324726469    1.0001554109176691
6                         -2                       1                        0                        1.0001194765906927
6                         -1.8888888888889062      1.0058608759724206       -8.450291959851225E-4    1.0000596699636233
5.924900737000987         -1.9276171027980435      1.0036762262575285       1.8703815213774493E-5    1.0001066388967244
5.888888888888888         -2                       1                        0                        1.0000832502480248
0.9786801014344108        -0.00406920546278494     0.5640356985749354       0.08864543586279545      1.2693642906449902
0.9790667173299725        -0.004535399021474188    0.5628303867162279       0.08491845359849487      1.2742293992991813
0.941694                  0.009784                 0.6995677613086461       -0.10279199491352485     1.0965535537142983
0.9440725202304963        0.012842029442541647     0.6985469214506165       -0.09695506143737466     1.0921251748817122
4.666666666666659         2                        1                        0                        1.0002930292647798
4.722221426009995         1.9095850961492224       1.0051896869106984       -1.4741784947001723E-5   1.000288198916593
6                         0.22222222222221433      0.9525209486333029       -0.0031478191263545987   1.000046716975679
5.90957925149915          0.2777777729622928       0.9569994426608336       -0.0018969416303939734   1.0002537345838018
6                         0.11111111111110272      0.9455612343418537       -0.0017019858148431633   1.0000528709930518
5.9095792558967775        0.16666664929498595      0.9480088606850049       -0.0012501552511049515   1.0003357982511851
6                         -1.7777777777777946      1.011385809701277        -7.282407241887669E-4    1.00002932585296
5.902667148384122         -1.8311186140137097      1.0088243328590945       1.5091844462891666E-4    1.0000037289426464
5.777777777777777         -2                       1                        0                        1.000044377088554
5.831955056500106         -1.9178854718636267      1.004334104853329        4.6746728958122966E-5    1.000060741907326
0.9780046629377859        -0.0041752603493462916   0.5684170554863612       0.08922893850972045      1.2508238738353687
0.9784277015539999        -0.004684652388936167    0.5670348270754006       0.08532683102153887      1.2534349721734186
0.9367521726568948        0.010496999964925618     0.710217935112964        -0.10243107889646803     1.0888028664756044
0.9397848800827249        0.013956636586025686     0.7082413544914518       -0.09500047886966424     1.093256731137921
4.555555555555548         2                        1                        0                        1.000316829367688
4.611110851081044         1.9095806801374349       1.0052285155978884       -1.53556751323152E-5     1.0003135610376697
6                         -8.881784197001252E-15   0.9431326611106826       1.2908295936373125E-5    1.000053815237622
5.909579270967037         0.05555549584984596      0.9431286344644797       -4.3851253060700647E-4   1.0003822459883123
6                         -0.11111111111112049     0.9455323005566801       0.001692123386083085     1.000067232343038
5.909579319565277         -0.05555574906001448     0.9431320236878796       4.464352026472556E-4     1.0003816872293807
6                         -1.666666666666683       1.0163327168681229       -5.3871787090851E-4      1.0000095555421211
5.909966630332074         -1.7158645754355597      1.014286461692117        1.7796488952504937E-4    1.0000011693642457
5.666666666666665         -2                       1                        0                        1.0000464493552585
5.722497581445939         -1.9144461891865256      1.0045955716792372       2.4916850835167552E-5    1.0000493997972066
0.9772674807837232        -0.004291009999558439    0.5730307958665317       0.08998050742644505      1.2398197623279392
0.977730706252925         -0.004851056663656355    0.5715346291616203       0.08579499750115577      1.2437766265228662
0.9312420000000001        0.011292                 0.7199812030276397       -0.10213401456826553     1.0823990430004837
0.9348495945175047        0.015203875928686642     0.7179072470911763       -0.0952573032126578      1.084953875705686
6                         -0.2222222222222321      0.9524848510080063       0.0031414895443902155    1.0000536914504308
5.90957946476053          -0.16666724988452364     0.9479776873785531       0.0012514692864643605    1.0003407560264799
6                         -0.3333333333333437      0.9628951330300556       0.004147287020253466     1.0000388945982666
5.909579857673361         -0.27777938124863355     0.9569656814097237       0.0018952722471079822    1.000256715163931
4.4444444444444375        2                        1                        0                        1.0003381047318438
4.499999999999993         1.9095792498413153       1.0052689752246857       -1.6090774335917103E-5   1.000336610037755
6                         -1.5555555555555713      1.0204480948117645       -2.7496536446942904E-4   1.0000053807548537
5.909164981888335         -1.6082191804185717      1.018678083855928        2.8638437214352215E-4    0.9999608453655963
5.555555555555554         -2                       1                        0                        1.00006413211387
5.612201028655792         -1.9118950112010078      1.0047836342318293       1.8959582841404703E-5    1.000060600058218
0.9764629108177176        -0.004417340637953724    0.577884188256661        0.09073595553444343      1.2296552902323796
0.9769686806368646        -0.00503480689664157     0.5763076814433344       0.08629437203025096      1.2333640683525064
0.9261040935387987        0.012006476639959972     0.7289682582763999       -0.10124392676845488     1.0786191684902975
0.9294966380786973        0.01612343208020629      0.7273325463350361       -0.0943853916293985      1.0809498254538286
0.92052                   0.012783                 0.7370318331866517       -0.10109329579962954     1.0729517272040339
0.9240829901667907        0.016996285359746687     0.7354910889363963       -0.09509083217165443     1.0751273818867635
6                         -1.4444444444444597      1.0236077594764363       5.574121574291246E-5     1.0000063081913773
5.909135849991362         -1.499045710964568       1.0222866534737562       4.173046779388016E-4     0.99995216639681
6                         -1.3333333333333481      1.025615441969351        4.397672599955234E-4     1.0000035770805422
5.9095277040909195        -1.3887964129663617      1.0248800405202145       5.706520540664497E-4     0.9999390097976324
6                         -0.4444444444444553      0.9752707033529145       0.00462497274049095      1.0000308512642957
5.909580787935085         -0.3888928012384023      0.9687299954578785       0.0023094975869891164    1.0001566244883928
6                         -0.5555555555555669      0.9880461953853229       0.0046021033973162396    1.0000264238170207
5.9095826073204485        -0.500008137895415       0.9816624550807668       0.0024727487021791866    1.0000613389303625
6                         -0.6666666666666785      0.9998653790642197       0.004191427070121825     1.0000239098965997
5.909585233385403         -0.6111246980556428      0.9942394788645806       0.0024145869859322103    0.9999844605141543
6                         -0.7777777777777901      1.0097872489176605       0.003544487663502608     1.0000219356739164
5.909587037322294         -0.7222384529232116      1.0052818886573414       0.0021968784427550004    0.9999326845958348
6                         -0.8888888888889017      1.017340942726963        0.00280631636112454      1.0000194286757478
5.909581241145364         -0.8333365132404805      1.014085824774081        0.0018925105849913993    0.9999057691862783
6                         -1.2222222222222365      1.0262705685860471       8.904876691292143E-4     1.0000112290651526
5.909533160452902         -1.27771172396383        1.0262624553663395       7.574023803643731E-4     0.9999283624939158
6                         -1.111111111111125       1.0253322439353012       0.0014411825790535619    1.0000132706406533
5.909563478060661         -1.1666250649650236      1.0261887323382946       9.868181234729155E-4     0.9999151765232249
6                         -1.0000000000000133      1.0224575570830952       0.002084931671654406     1.0000161497079383
5.909589970496054         -0.9444485155105887      1.0204099748639688       0.001564752430431961     0.9998984885367929
5.909585454143244         -1.0555418482662116      1.024349334605746        0.0012558110806327012    0.9999035997424631
4.333333333333327         2                        1                        0                        1.0003565522491058
4.388888888888882         1.9095792498413153       1.005311435903222        -1.6940567291610274E-5   1.000357038290975
5.444444444444442         -2                       1                        0                        1.000089376067515
5.500792215672747         -1.9109516214745532      1.004878015305878        1.6476404846058525E-5    1.0000820192030686
0.9755813665831439        -0.004555757494949131    0.5830028395347295       0.09154017171504551      1.2203601083833935
0.9761323320323684        -0.005230129178111189    0.5813489759897501       0.08687102329235295      1.2242087512958397
0.9152086853074515        0.013499605950581917     0.7445579103977807       -0.10030879490581114     1.0694165937785693
0.9187171410528474        0.01789325652977164      0.7431234304895641       -0.09439247802645458     1.0711669137215265
4.222222222222216         2                        1                        0                        1.0003718658775604
4.2777777777777715        1.9095792498413153       1.0053562617912843       -1.7905609063008997E-5   1.0003745542259355
5.33333333333333          -2                       1                        0                        1.0001191732816013
5.389401095577776         -1.9101856810440165      1.004956840724773        1.4476054088334834E-5    1.0001104587722998
0.9745943063505362        -0.004710742088693059    0.5885025751580196       0.09240833513549636      1.2112638987868232
0.9752106105836778        -0.005448661274284869    0.5867017344115157       0.0874741876838092       1.2151125361838464
0.9095580000000001        0.014262                 0.7512798235293788       -0.10035203958554301     1.0643384965293323
0.9133475346519456        0.018784703246949173     0.7497354618409832       -0.09491277216004984     1.0664468258723951
4.111111111111105         2                        1                        0                        1.0003837205597619
4.166666666666661         1.9095792498413153       1.0054037606700594       -1.899826820154925E-5    1.000388850954449
5.222222222222219         -2                       1                        0                        1.0001503530789904
5.278108673784209         -1.9097343711562207      1.0050169775330164       1.3907655715253222E-5    1.0001412535827752
0.9735170162758675        -0.004879894242787826    0.5942565864826762       0.0932922438347434       1.201740680012602
0.9741973907948075        -0.005716262283081807    0.5924054438253369       0.08798435714322726      1.2063166107148284
0.9041088725304509        0.014980904143541933     0.7575500356608934       -0.09978677323550282     1.061114339751695
0.9079317083357287        0.019691675173259086     0.7560268380437235       -0.09454367678146271     1.0626251763852539
3.999999999999995         2                        1                        0                        1.0003917675417846
4.05555555555555          1.9095792498413156       1.0054542717751582       -2.02326617170159E-5     1.0003996032984555
5.111111111111107         -2                       1                        0                        1.000181536519277
5.166883320023336         -1.90971552951685        1.005052688881254        1.366446111336982E-5     1.0001728112872073
0.972341248205551         -0.005064509052193808    0.6002448051081409       0.09431051713490483      1.191026183617441
0.9730836901790779        -0.0060062705281062915   0.5984058170673544       0.08855670230312944      1.1963522266673723
0.898393                  0.015735                 0.7631771177726666       -0.10010320337486851     1.0562755311059433
0.9024589404663016        0.02061708774526168      0.7615615902516853       -0.09500661085296928     1.0584097932493535
3.8888888888888835        2                        1                        0                        1.0003956282972006
3.9444444444444393        1.9095792498413153       1.0055081762963347       -2.1627666516207946E-5   1.0004064612825063
4.999999999999996         -2                       1                        0                        1.0002121347535413
5.055689239750961         -1.9097022498877552      1.0050882670022834       1.381291113143245E-5     1.0002039408549395
0.971058                  -0.005266                0.6065079752639803       0.09498676799282507      1.187437171515004
0.9718531391252044        -0.00632372116056626     0.6047900481788208       0.08913456847192612      1.1886677059217658
0.8928376742053992        0.01645805079216263      0.7683851347382307       -0.09987278354909364     1.0528566539503204
0.8968328927411913        0.021610204959453958     0.7669377006120105       -0.09501154875935656     1.0542721253017984
3.7777777777777737        2                        1                        0                        1.0003948901457358
3.8333333333333286        1.9095792498413153       1.00556590783001         -2.3206855353463518E-5   1.0004090453336436
4.888888888888884         -2                       1                        0                        1.0002418071242627
4.94452279135159          -1.9096696818243035      1.0051254076391614       1.402668718794384E-5     1.0002344020608376
0.9695358996393248        -0.005503812973329394    0.6136058460143076       0.09580879454590789      1.1811412505633623
0.9704741564746582        -0.0066434800140284305   0.611480411024237        0.08968039049644903      1.1833331838538277
0.887068                  0.017209                 0.7731615511984962       -0.1003816053583844      1.047614165087962
0.8911761479692669        0.02300806510074117      0.7718583523170638       -0.0952112141911952      1.0499889686780361
3.666666666666662         2                        1                        0                        1.0003891034280772
3.7222222222222174        1.9095792498413153       1.005627963663165        -2.4999006310540732E-5   1.0004069428370572
4.777777777777772         -2                       1                        0                        1.0002701161749503
4.833372043679373         -1.9096300202910672      1.0051638214569965       1.4381515293506095E-5    1.00026375930217
0.9678543785826792        -0.005766533837556452    0.6209070657967617       0.09703176201247148      1.1699650866025817
0.9688845365967187        -0.0070603432860395325   0.6187524075538985       0.090370733145294        1.1740261596526167
0.875629                  0.01869                  0.7816058417847104       -0.10101118074411279     1.0395015730755153
0.8843352278235199        0.025183713005914363     0.7775498798979826       -0.09511290849264946     1.0447819271768204
3.5555555555555522        2                        1                        0                        1.0003777808829935
3.6111111111111067        1.9095792498413153       1.0056949169330602       -2.703863845661322E-5    1.0003997065743553
4.666666666666661         -2                       1                        0                        1.0002966526758765
4.722235809284364         -1.9095968373562802      1.005203062027319        1.4863694001897233E-5    1.0002916051386104
0.9659964522002144        -0.006056816271393543    0.6285091799557957       0.09816899541798457      1.1589804518554316
0.9671310726854293        -0.007500119792843288    0.6263132942083421       0.09124507689282753      1.1636464138923588
0.864117                  0.020176                 0.7889743268822578       -0.10169983412733981     1.0321763242316488
0.8696125871036007        0.02793780532535046      0.7876278387517502       -0.0963481015340988      1.0345029513674626
3.4444444444444406        2                        1                        0                        1.0003603997957227
3.4999999999999964        1.9095792498413153       1.005767429847267        -2.9366542141957893E-5   1.0003868555664994
4.555555555555549         -2                       1                        0                        1.000321038898151
4.611113750529318         -1.909582238665415       1.0052427633351793       1.547982102843647E-5     1.0003175258348274
0.9639432495599071        -0.006377608669420873    0.6363667891373096       0.09952473919675754      1.1465336163652227
0.9651977302048524        -0.007959667421311632    0.6341252624131458       0.09226854000182177      1.1527436731953857
0.852562                  0.021663                 0.795481761102954        -0.10220531704253734     1.0256165909783292
0.8592884119110412        0.029894286109423202     0.7937749107217188       -0.09708073725198563     1.0285325227762383
0.840979                  0.023149                 0.8013159307245012       -0.10266855072579771     1.019588822791496
0.8481057416349559        0.03195074293074076      0.7997350858283673       -0.09776283390364314     1.0225459957824012
3.3333333333333304        2                        1                        0                        1.0003364074564753
3.3888888888888857        1.9095792498413153       1.005846267779974        -3.20302230895862E-5     1.0003678790141042
4.4444444444444375        -2                       1                        0                        1.0003429533013843
4.500000078044294         -1.9095792989443254      1.0052835900235768       1.6211811373693206E-5    1.0003411861100815
0.9616750000000001        -0.006732                0.6445235953770311       0.10033050171939628      1.1409268888506259
0.9630875329582248        -0.008379190544125765    0.6421038429801711       0.0935108450198548       1.1434400945971157
0.829375                  0.024633999999999996     0.8065981856754639       -0.10309804120193766     1.0139097247142619
0.8366130315804812        0.033779769279299855     0.8052001184722561       -0.09850293415500978     1.0167533278707792
3.2222222222222197        2                        1                        0                        1.0003052315721508
3.277777777777775         1.9095792498413153       1.0059323140581933       -3.5084603167452235E-5   1.000342244009751
3.111111111111109         2                        1                        0                        1.0002662972255358
3.1666666666666643        1.9095792498413153       1.006026585344119        -3.8592323666334246E-5   1.0003094087296345
2.9999999999999982        2                        1                        0                        1.000219052807326
3.0555555555555536        1.9095792498413153       1.0061302464617021       -4.262374388218779E-5    1.0002688428542656
2.8888888888888875        2                        1                        0                        1.0001630077338377
2.944444444444443         1.9095792498413153       1.0062446233006144       -4.725624001593941E-5    1.000220057813513
2.777777777777777         2                        1                        0                        1.000097785291913
2.833333333333332         1.9095792498413153       1.0063712117360017       -5.257266870356482E-5    1.0001626498009009
4.333333333333326         -2                       1                        0                        1.0003620959539918
4.388888888888882         -1.9095792498413153      1.0053263228443043       1.7059994715922218E-5    1.00036228205167
0.9595121776611877        -0.007067333240559005    0.6518964673309914       0.10099506581252521      1.1350970200553951
0.9608874226053769        -0.008870327918316072    0.6499489514380955       0.0941358732430282       1.1374131509286898
0.817752                  0.026118000000000002     0.8114331756575178       -0.10350522360804987     1.0084814768488
0.8249643380136041        0.03545008110504035      0.8102096102541972       -0.09922748594930263     1.0112126425996804
0.806117                  0.027601                 0.8158962347752178       -0.10391631928586542     1.0031561571794567
0.8132914104384396        0.037035081723487295     0.8148145508109575       -0.09991648059094278     1.005844145733385
0.794473                  0.029083000000000005     0.8200594437105381       -0.10430563017037535     0.9979149298291928
0.8016224703094109        0.03856558519948914      0.8190990705898201       -0.10055296334617915     1.0005982686258406
2.666666666666666         2                        1                        0                        1.0000231949334561
2.7222222222222214        1.9095792498413153       1.0065116800943814       -5.865879306736927E-5    1.0000963588728131
4.222222222222214         -2                       1                        0                        1.0003781674702366
4.277777777777771         -1.9095792498413149      1.0053714154135678       1.8026579330090576E-5    1.0003805224824964
0.9571828721383655        -0.007428478747151502    0.6592238149391422       0.10213354550165586      1.1223716604537775
0.9586175612166313        -0.009331980791036925    0.6573052378334968       0.09524999507305826      1.129044594847052
0.782828                  0.030563                 0.8239800191602998       -0.1046221181974324      0.9928149329401151
0.7899507237079533        0.04005824672074851      0.8231352357781692       -0.1011179916869805      0.9954843886290753
0.771183                  0.03204                  0.8277044788500655       -0.10487627542682504     0.9878494103359047
0.7782779451919845        0.04152937381105238      0.8269670205228986       -0.1015791771606686      0.9904981497130726
0.759543                  0.033513                 0.8312634577907528       -0.10502550733200595     0.9830359303534643
0.7666160538260557        0.04299028377818021      0.83062302836841         -0.1019503989588595      0.9856505912634018
0.747907                  0.034981                 0.8346805965597635       -0.10520137699667542     0.9781327060982304
0.7549693412055044        0.04444464885702986      0.8341183556336283       -0.10222895035608177     0.9808382370161547
0.736277                  0.036445                 0.8379698523696765       -0.10527373037069139     0.9732679121136566
0.7433315749750399        0.04589560135931391      0.8375018311725345       -0.10248428397194372     0.9760068666282379
0.724654                  0.037902                 0.8411828596556896       -0.10527768938926256     0.9684373641191669
0.7317012109987079        0.04734850832971487      0.8407994256633975       -0.10258936667778813     0.9712486962404911
2.5555555555555554        2                        1                        0                        0.9999393283116395
2.6111111111111107        1.9095792498413153       1.0066678616609128       -6.559875523384622E-5    1.0000211484261639
4.111111111111103         -2                       1                        0                        1.0003908517907185
4.166666666666659         -1.9095792498413153      1.0054191780535484       1.9119127596824167E-5    1.0003956101337474
0.9546189371253542        -0.007826002215014309    0.6667062196238852       0.10375554499246593      1.1051493921713305
0.9561999377725844        -0.0098585440038287      0.6648375753295407       0.09634541141622414      1.1154646523081715
0.71304                   0.039353                 0.8442977325804563       -0.10522269661611072     0.9635599786153243
0.7200842502524112        0.04880373611759229      0.8440127534931339       -0.1026646987197165      0.9664603197038085
0.701436                  0.040795                 0.8473727974614064       -0.10502818329024687     0.9587537951067556
0.7084825840782633        0.050252777717564485     0.847180004055699        -0.10258465263560092     0.9617229985803292
0.689844                  0.042228                 0.8503807638061064       -0.1048153689397842      0.9538071321338037
0.6968896152870885        0.05168185745278259      0.8502855211694725       -0.10244871450075753     0.956941238594245
0.678266                  0.04365                  0.8533617577098921       -0.10440305753262946     0.9489878815428625
0.6853011708701584        0.053085995536026685     0.853377475905995        -0.10218610892337456     0.9521643386851607
2.4444444444444446        2                        1                        0                        0.9998466856587541
2.5                       1.9095792498413153       1.0068417319431273       -7.346870497397188E-5    0.9999373094683689
3.9999999999999907        -2                       1                        0                        1.0003998082199805
4.055555555555547         -1.9095792498413153      1.0054699469047474       2.035177263720792E-5     1.000407228363189
0.951852                  -0.008255                0.6743473836678664       0.10302688775872902      1.112515272064732
0.9535723506895657        -0.010477659570483027    0.6730211586664215       0.09696256736804583      1.10883984046929
0.666701                  0.045059                 0.85631646094143         -0.10389692357393158     0.9441762041682699
0.6737220065272179        0.054475008076049054     0.856434298589927        -0.10177707059122958     0.9474611605925981
0.655152                  0.046454                 0.8592344275729613       -0.10328789728450777     0.9393116481805693
0.6621588972784956        0.05585716374312977      0.8594636986666595       -0.10126919548199313     0.9427179067589756
2.333333333333334         2                        1                        0                        0.9997463388367879
2.3888888888888893        1.9095792498413153       1.007035364444098        -8.232672725961882E-5    0.9998455960052185
3.8888888888888795        -2                       1                        0                        1.0004046660911379
3.9444444444444358        -1.9095792498413153      1.0055240992634091       2.1743387159046997E-5    1.000415035148153
0.9487490016682145        -0.008721763285190812    0.682904687378155        0.10216853301248775      1.1115441735563243
0.9506811951019227        -0.011183011978020685    0.6812584988494348       0.09588273264614113      1.1127027619977559
0.643618                  0.047833                 0.8621387448050397       -0.10249394379363506     0.9345793474997421
0.6506101247167609        0.057229249579616955     0.8624864093999517       -0.10060745959006305     0.9380246643788773
0.6321                    0.049194                 0.8650221289909611       -0.10157895686084889     0.929874133112703
0.6390661016279829        0.05858487095477468      0.8654808567772871       -0.09980126684799127     0.933403306722962
2.222222222222223         2                        1                        0                        0.9996401363565378
2.2777777777777786        1.9095792498413153       1.0072508554231787       -9.219819174598397E-5    0.9997473975065291
3.777777777777768         -2                       1                        0                        1.0004050205180044
3.8333333333333237        -1.9095792498413153      1.0055820646677998       2.331752252892355E-5     1.000418658712286
0.9453723257822877        -0.009229694054406818    0.6907458599277586       0.10460211956189948      1.0902182830335516
0.9475114216181022        -0.011999886862025527    0.6890624238935384       0.09635793972869426      1.1009523415701539
0.55187                   0.058109                 0.8843936937819613       -0.0917731823069355      0.8971590632901939
0.563294                  0.05691                  0.8817410214297506       -0.09350845540026292     0.9018599189591273
0.5586503798877251        0.06746740410915364      0.8856580431862205       -0.09072852948890738     0.9012930831159373
0.540458                  0.059279                 0.8870328693507865       -0.08986734134487528     0.8925550259845432
0.5472154208060553        0.0686473884307605       0.8884146259911062       -0.08893052818071595     0.8967558655905395
0.529057                  0.06042                  0.8896102790250828       -0.08789237860479547     0.8878761435933838
0.5357799737470732        0.0698022207825322       0.8911212235324397       -0.08705174074927412     0.8921968026503951
0.57473                   0.055685                 0.8790179377455226       -0.09515926645657717     0.9064512317818721
0.5700838608395796        0.06626727697715895      0.8828865543880385       -0.09235016157943182     0.9058761999420427
0.620598                  0.050536                 0.8678723818743607       -0.10060436405110483     0.9250364826148796
0.6275220694281934        0.059921380039158756     0.8684462789922364       -0.09889055327265729     0.9287203283834993
0.609111                  0.051858                 0.8706979766797547       -0.09941346129154405     0.9203779631121245
0.6159852505371329        0.06123883778285663      0.8714093073609938       -0.09785570899199991     0.9240549129434644
0.597637                  0.05315700000000001      0.8735176529822386       -0.09807320367552197     0.915830636817978
0.6044694185946896        0.06253563101020534      0.8743392535559892       -0.09662770383425025     0.9195482560604774
0.586177                  0.05443300000000001      0.876281960675576        -0.09674677801389948     0.9110282736219956
0.5929831024575336        0.06380655254477864      0.8772085292946258       -0.09534012332981495     0.9149413935378986
0.5815241971052286        0.06504882232667868      0.880071189191837        -0.09393778767872406     0.9103475828486056
2.1111111111111125        2                        1                        0                        0.9995309540368768
2.166666666666668         1.9095792498413153       1.007490206834075        -1.0305628371688425E-4   0.9996449531886443
3.6666666666666563        -2                       1                        0                        1.0004004296196005
3.722222222222212         -1.9095792498413153      1.0056443362208654       2.510291062938263E-5     1.0004176941927432
0.941694                  -0.009783                0.6989086921098909       0.10274121960995075      1.098254704659766
0.9440724474153875        -0.012995592248817509    0.6979546541243545       0.09638776545719306      1.0927340004168296
0.517668                  0.06153                  0.8921529244324063       -0.08575769959941726     0.883238954914173
0.5243510859077647        0.07092779638173595      0.8937956180297809       -0.08503248990404473     0.8876367079085127
2.0000000000000018        2                        1                        0                        0.9994229920144377
2.055555555555557         1.9095792498413153       1.0077551569214362       -1.1479752784488376E-4   0.9995416103904858
3.555555555555545         -2                       1                        0                        1.0003904139832036
3.611111111111101         -1.9095792498413153      1.005711482757653        2.7134003252642518E-5    1.000411702046289
0.9367469669235579        -0.010496751040879708    0.7094921804256511       0.10248603021080166      1.090532332830024
0.9400924373703942        -0.014592220981257953    0.707635175239546        0.09359236474949106      1.0925823506082715
0.9312420000000001        -0.011291                0.7191684681292004       0.10198235793162136      1.084546993185611
0.9329283615624409        -0.01466304401208593     0.7198631877701988       0.0965626509936327       1.0833978388329344
0.9260975971123673        -0.012006380032219766    0.7283398939451405       0.10109781913126198      1.0786161227540738
0.9287273440707368        -0.015374550541389611    0.727139898957654        0.09539902333638556      1.0814120886860816
0.506292                  0.062608                 0.8946425466229475       -0.08354508828686598     0.8785105095219272
0.51293483649389          0.07202106078924003      0.8964181701725272       -0.08290669254310523     0.8830572804099539
0.4949279999999999        0.063653                 0.8970823549410679       -0.08118846884860452     0.8737774585402445
0.5015313706886361        0.07307960904783307      0.8990044605160158       -0.08066462555235243     0.8784286902382487
1.8888888888888906        2                        1                        0                        0.9993221081350839
1.9444444444444464        1.9095792498413153       1.008046948420464        -1.272109890181122E-4    0.9994421257002557
3.444444444444433         -2                       1                        0                        1.0003744589099364
3.4999999999999893        -1.9095792498413153      1.0057841618590222       2.9451392323057257E-5    1.0004002090286779
0.92052                   -0.012782000000000002    0.73638587442291         0.10107095677997618      1.0743067301493052
0.9236844941724007        -0.01667869954719984     0.7351213551508345       0.09550660752128558      1.0752684138421609
0.483579                  0.064663                 0.899477242562107        -0.07867536757778999     0.8690818472981041
0.4901367103245613        0.07409816619427391      0.9015471809322176       -0.07827847186523611     0.8738319333982377
0.4722430000000001        0.065637                 0.9018158888791964       -0.07609671606976848     0.8642101599747606
0.4787495015617116        0.0750743128868483       0.9040319624815562       -0.07577287656116682     0.8691699135329544
0.46092299999999997       0.066574                 0.9040880497523999       -0.07331846005171053     0.859390022492203
0.46737658359604645       0.07601226893433731      0.9064847142440877       -0.07314818490318266     0.8644511378083665
0.449619                  0.067471                 0.906321317090438        -0.0703465706638548      0.8547044496299531
0.4560266874961427        0.076912111353445        0.9088913876301487       -0.07031349963778043     0.8598375811855102
1.7777777777777797        2                        1                        0                        0.9992361753716302
1.8333333333333353        1.9095792498413153       1.0083660261679361       -1.399463082634628E-4    0.9993529965311189
3.3333333333333215        -2                       1                        0                        1.0003520202417477
3.3888888888888773        -1.9095792498413153      1.005863133608549        3.210232731832104E-5     1.0003827122910696
0.9152045014033613        -0.013499170445578228    0.7439472323298538       0.10019641909863548      1.0699457901569107
0.9184391980123657        -0.017836004949307087    0.742800555349164        0.0943786761911355       1.0714575753559314
0.438331                  0.068327                 0.9084744159332817       -0.06722361810219409     0.8500305447851036
0.44469917797803804       0.07776961186477814      0.9112206618898694       -0.06734547860931127     0.8552552381336033
0.42706                   0.06914                  0.9105616603894126       -0.0640134771728046      0.8451669842621984
0.43338711033278754       0.07858329962073984      0.9134689638763128       -0.06422710099426637     0.8506236838743905
0.382166                  0.071936                 0.9180280163020843       -0.04928141957608604     0.8257226883726352
0.393359                  0.07131                  0.9162965068588308       -0.05327355950783307     0.8305058904987715
0.388271203858563         0.08135870588445306      0.9218133639176457       -0.050144751472276504    0.8317611822856349
0.415807                  0.06991                  0.9125442744397781       -0.06066836259953407     0.8401605974514231
0.42208436155102036       0.07935119440680606      0.9156551244326122       -0.0610182580175539      0.8458380564409184
0.40457300000000007       0.070634                 0.9144650769450594       -0.057055906780801       0.8353213445174483
0.41079055038935935       0.0800692762564323       0.9177962676269259       -0.05758392636366694     0.8411017982573404
0.3995153681049162        0.0807370768971031       0.9198504733782151       -0.05395625937915494     0.8364210545662879
1.6666666666666683        2                        1                        0                        0.9991754273063084
1.722222222222224         1.9095792498413153       1.0087116647790497       -1.5247701624254378E-4   0.9992828073484773
3.22222222222221          -2                       1                        0                        1.000322534928145
3.2777777777777657        -1.9095792498413153      1.0059492751071142       3.514124038204717E-5     1.0003586874523769
0.9095580000000001        -0.014261                0.750699266821434        0.10030399670524105      1.064845594100499
0.9129806042068312        -0.018837884836263346    0.749567574892004        0.09483264628974354      1.0666426736965986
0.370997                  0.07251                  0.9196515635209394       -0.04515799895086506     0.8207724602321528
0.3770595617308494        0.08193753145136956      0.9236709174635248       -0.04616220839190132     0.827079698094785
1.5555555555555571        2                        1                        0                        0.9991527480959098
1.6111111111111127        1.9095792498413153       1.0090815318355182       -1.6407177260517193E-4   0.9992425512417933
3.1111111111110983        -2                       1                        0                        1.0002854379367696
3.166666666666654         -1.9095792498413153      1.006043595434673        3.863011996885264E-5     1.000327601900058
0.9041060314154271        -0.014980767281116017    0.7569726111380749       0.09979948978269364      1.061266343433351
0.9074671746791686        -0.01972558070286985     0.7559112472731483       0.09452756890511967      1.0625685041840267
0.359853                  0.073031                 0.921137165259912        -0.040851143679922146    0.8157112742655631
0.36587126869228365       0.08247319751224101      0.9254411922359794       -0.04202755476171128     0.8222815783174832
0.348736                  0.073496                 0.9225009235965086       -0.03620863449469107     0.8109046882833163
0.3546998543002668        0.08295760826081795      0.9271274539616742       -0.037634734554359645    0.8175771750465318
0.337647                  0.073902                 0.9237404949956068       -0.03139158027795646     0.8060157089273826
0.34354615901023644       0.08337521452704949      0.9286673060333864       -0.03298866244092712     0.8129539993261637
0.326589                  0.074248                 0.9247989938149276       -0.02638656352737152     0.8009462608633381
0.3324144946805519        0.08371715137133717      0.9300607722089026       -0.028176794924677406    0.8081890183913415
0.315563                  0.074531                 0.9256926465381096       -0.02106751338247558     0.795995171862053
0.3213126524159294        0.08398813644262458      0.9313235220068935       -0.023099340125192432    0.8034458871857691
1.444444444444446         2                        1                        0                        0.9991838415648325
1.5000000000000016        1.9095792498413153       1.0094712152173055       -1.7377523116003416E-4   0.9992458786187773
2.9999999999999867        -2                       1                        0                        1.0002401877783023
3.0555555555555425        -1.9095792498413153      1.0061472502577962       4.2638568372538224E-5    1.0002889350900377
0.898393                  -0.015735                0.7626289720283767       0.10007617060901969      1.0567170337476073
0.9020435051282327        -0.020491461605127118    0.7613406042145184       0.0951559526524467       1.058369658528761
0.304574                  0.074748                 0.9263955235132587       -0.015449895957115982    0.7911810649666445
0.3102479704367364        0.08419460055786811      0.9324232856595979       -0.017743654137320864    0.7988136329488312
0.293625                  0.074896                 0.926896313853906        -0.009574206058105767    0.7863261573348724
0.2992208693445564        0.0843354661592417       0.9333313095288355       -0.01211054994486558     0.7942458880119138
0.282717                  0.074973                 0.9271535026656549       -0.0034668970338581906   0.7813098954181926
0.28822983643275574       0.08440518728692743      0.9340387335867161       -0.0062369135383693805   0.7896027954548887
0.271857                  0.074976                 0.9271428681486          0.0030410447409438494    0.7764994757148873
0.27728016990958887       0.08439733924164493      0.9345476618861849       -5.896734464022016E-5    0.7850181831965372
1.3333333333333346        2                        1                        0                        0.9992871819833399
1.3888888888888904        1.9095792498413153       1.0098737550182333       -1.8040667306351633E-4   0.999309205449611
2.888888888888875         -2                       1                        0                        1.0001863035590042
2.944444444444431         -1.9095792498413153      1.0062615547643199       4.7243268942730257E-5    1.0002422082894613
0.8928356646069161        -0.016458312350499396    0.7678732023495466       0.09979623080232107      1.0533161255710102
0.8970440066991843        -0.021595304435846074    0.7662456344008605       0.0949062958618573       1.0549518094207355
0.261048                  0.074901                 0.9268763228368208       0.009829699811163986     0.7716436177788658
0.2663794014314468        0.08430766534704164      0.9348025028450296       0.006468819618017571     0.780559443488431
1.2222222222222237        2                        1                        0                        0.9994836634928596
1.277777777777779         1.9095792498413153       1.0102792504124525       -1.8260469296224968E-4   0.9994515826722977
2.7777777777777635        -2                       1                        0                        1.0001234170819289
2.8333333333333193        -1.9095792498413153      1.006387992934753        5.252657055419555E-5     1.0001870268295405
0.887068                  -0.017209                0.7726513743693089       0.10030856983637451      1.04805875139116
0.8919230336945314        -0.022956356542326934    0.7707630391489634       0.09500480387708306      1.0515743038389698
0.250295                  0.074746                 0.9262482329785943       0.01700700673262764      0.7669120349759112
0.255531632496247         0.08413577938725125      0.9347979380865569       0.013281318006725428     0.7761073469889587
0.23960400000000004       0.074506                 0.9253123492722658       0.024560634908172247     0.7622751795215889
0.24473958563334944       0.08387874064165853      0.9344916443918754       0.020515394194593417     0.7718691970750909
1.1111111111111125        2                        1                        0                        0.9997958513204134
1.1666666666666679        1.9095792498413153       1.010674651273504        -1.78910894124957E-4     0.9996942415451865
2.666666666666652         -2                       1                        0                        1.000051344371026
2.7222222222222077        -1.9095792498413153      1.0065282204650605       5.857390357674633E-5     1.0001231384339475
0.875629                  -0.01869                 0.7811349250771409       0.10091303588220361      1.040012090945289
0.8809127589530199        -0.024499219898492713    0.7791570120190369       0.09613245914884734      1.0429017317174278
0.228982                  0.074179                 0.9239341546179856       0.032499165101798115     0.7577408121550485
0.2340068115112618        0.08352743531883479      0.9338458072633445       0.028065691500823133     0.7676692922166332
0.21843600000000002       0.07376                  0.9221627377566103       0.04087029774183676      0.7533390963404006
0.22333966067496677       0.08307257633567727      0.9328149115067702       0.036069416876091116     0.7637040281920265
1.0000000000000013        2                        1                        0                        1.0002467805744566
1.055555555555557         1.9095792498413153       1.0110438327877354       -1.6790867195719738E-4   1.000059726106099
2.5555555555555403        -2                       1                        0                        0.9999701811452327
2.611111111111096         -1.9095792498413153      1.0066840576732468       6.546929581790406E-5     1.0000505119739127
0.864117                  -0.020175                0.7885353573040691       0.10158844749050004      1.0325894691724578
0.8682329672311027        -0.026542793489224475    0.7875625325966639       0.09724009504410581      1.0343137693704716
0.207976                  0.073247                 0.9198754466791993       0.04956868023492476      0.7487657841593253
0.21274887699060682       0.08251217180930048      0.9313604269287481       0.044412284743935666     0.7597281853408316
0.8888888888888904        2                        1                        0                        1.0008583030472
0.944444444444446         1.9095792498413153       1.0113680589701206       -1.484076528052117E-4    1.000570571172463
2.4444444444444287        -2                       1                        0                        0.9998804283846977
2.4999999999999845        -1.9095792498413153      1.0068574672092199       7.328886951122323E-5     0.9999694412047647
0.852562                  -0.021662                0.7950430286764977       0.10220638571145148      1.0259162073809978
0.8588839488900679        -0.028700733391599863    0.7932102856379873       0.09768315021472111      1.0287064067554195
0.840979                  -0.023149                0.800884230554136        0.10265331254920573      1.0197892165118525
0.8479736767200488        -0.031777655984078765    0.7993199070183121       0.09783438072120992      1.0227223416752143
0.829375                  -0.024633999999999996    0.8061939078625681       0.10303610877503488      1.014233432678048
0.8364111701952729        -0.03356336351260296     0.8048307985384354       0.09856149960902617      1.0169762429157314
0.19761299999999998       0.072636                 0.9170298555674151       0.05884898570587288      0.7447015045537916
0.20224838498640185       0.08184804048909015      0.9294828749651777       0.053227842971803385     0.7559739040806018
0.187358                  0.071922                 0.9135916165487327       0.06870800721726981      0.7412448194481809
0.19185166908165294       0.08107626254268123      0.9270776762449217       0.06258310949379396      0.7527920083974551
0.177226                  0.071102                 0.9095204458395129       0.07885832616047375      0.7374725991147247
0.18157054080619062       0.080187463587199        0.9240457039119715       0.07237585645857238      0.7498438874510523
0.777777777777779         2                        1                        0                        1.0016490737094523
0.8333333333333348        1.9095792498413153       1.011626901674829        -1.1965863474982606E-4   1.0012475433733272
0.817752                  -0.026118000000000002    0.8110429462342089       0.10345720412879128      1.0087875452916542
0.8248175300907779        -0.03521979544558916     0.8098226963481272       0.0992675942999306       1.0114688886376841
0.806117                  -0.027601                0.8155188710935657       0.10387157368981122      1.0034289833970529
0.8131985055761856        -0.03684565598885387     0.814427612594249        0.09993315493873335      1.0061010005760347
2.333333333333317         -2                       1                        0                        0.9997831547562069
2.388888888888873         -1.9095792498413153      1.0070505102486          8.209099775034019E-5     0.9998806793525289
-1.8888888888888888       2                        1                        0                        1.0312655694881256
-2                        2                        1                        0                        1.031276801200817
-1.923789053053591        1.92809514209127         1.0000206980701971       2.2841838291354742E-5    1.0312810974793127
-2                        1.8888888888889062       1                        0                        1.031299087151911
0.167232                  0.070175                 0.904559085328266        0.08964226786106196      0.7343986322845989
0.17141802834738865       0.07917189807784639      0.9203933432147297       0.08257463926541524      0.7470478746037513
0.6666666666666679        2                        1                        0                        1.0026322980309608
0.7222222222222237        1.9095792498413153       1.0117996144637642       -8.15517734493087E-5     1.0021075696498583
0.7944739999999999        -0.029083000000000005    0.8196903719336639       0.10427138804657225      0.9981671102408068
0.8015689287528435        -0.038473679977746686    0.8187308398851866       0.10053550543099844      1.0008413019082345
2.2222222222222054        -2                       1                        0                        0.9996802004402657
2.2777777777777612        -1.9095792498413153      1.0072652719835924       9.190148866558425E-5     0.999785610955595
-1.7777777777777777       2                        1                        0                        1.0311627138493964
-1.8293095831788024       1.9199572997048306       1.0000932502300224       5.087178818758163E-5     1.0312165229879395
-2                        1.7777777777777946       1                        0                        1.0314032440362475
-1.900746793200264        1.8316295218626144       1.0000330347643198       9.781155782600612E-5     1.0313259038884064
0.157394                  0.069135                 0.8988755118696572       0.10101523169330288      0.7320790960259563
0.16141296496026833       0.07801752880865015      0.9159517951543075       0.09345955561388573      0.7451682513889836
0.5555555555555567        2                        1                        0                        1.0038137990805054
0.6111111111111124        1.9095792498413153       1.011866891922957        -3.486440674785113E-5    1.0031614836155758
0.782828                  -0.030563                0.8236257169283553       0.10452117092365625      0.9931960869113547
0.7899341579832856        -0.03999959245578531     0.822777606050849        0.10107183003835606      0.9957906910355628
0.7711839999999999        -0.032039                0.8273557866217821       0.10483399376463864      0.9881538316238405
0.7782951087322877        -0.04149373200031961     0.8265933348886357       0.10150599469224099      0.9908404224436381
0.759543                  -0.033513                0.8309026531797247       0.10502907495615266      0.983211328762184
0.7666512426480719        -0.042967394184257796    0.8302446032134384       0.10193773179476008      0.9858909906167065
2.111111111111094         -2                       1                        0                        0.9995744269869515
2.1666666666666496        -1.9095792498413153      1.0075037453323519       1.0269462129207497E-4    0.9996864650366976
0.747907                  -0.034981                0.8343385959654269       0.10514397954215719      0.9784032370235248
0.7550065064041315        -0.04442389996616206     0.8337652669495877       0.10219106530146689      0.9810941957202498
0.147735                  0.067983                 0.892169941801824        0.1127845395384416       0.7300260801782475
0.15157669777531774       0.07672809032834586      0.9106459887564232       0.10472589569141043      0.7436050484632747
0.44444444444444553       2                        1                        0                        1.0051901055358667
0.5000000000000012        1.9095792498413153       1.0118128378322255       1.88996925936784E-5      1.0044121600331009
-1.6666666666666665       2                        1                        0                        1.030965258499889
-1.7230259105703867       1.9128281259434663       1.0002435708916169       8.685409924065318E-5     1.0310651648953373
-2                        1.666666666666683        1                        0                        1.0315959566692388
-1.909843728313203        1.7171586362024645       1.0000302243497645       1.5821794932598313E-4    1.0314807351496358
1.9999999999999822        -2                       1                        0                        0.9994700140881217
2.055555555555538         -1.9095792498413153      1.0077676630308767       1.1436867159747112E-4    0.9995865726762047
0.736277                  -0.036445                0.8376300833110027       0.10524114754229998      0.9735194882836709
0.7433641119007786        -0.04586900376421877     0.8371477857327548       0.10244539723888801      0.9762876062301339
0.724655                  -0.037902                0.8408456993488017       0.10523541017145498      0.9686863248832687
0.7317266253763366        -0.04731079387512987     0.8404505990998441       0.10255778033593059      0.9715060544652548
0.71304                   -0.039353                0.8439671188804354       0.10517154253479333      0.9638171917830975
0.7200993395406878        -0.04875575475238909     0.8436688798840944       0.10262695814500233      0.9667284001871131
0.138276                  0.066717                 0.8844989677985252       0.12506849661973407      0.7285443569949243
0.14193146098602435       0.07530657353428792      0.9044196045362275       0.11653944387716296      0.7427185212918231
0.33333333333333437       2                        1                        0                        1.006747500074955
0.38888888888888995       1.9095792498413153       1.0116266528789701       7.72876148365255E-5      1.0058528173644394
0.2222222222222232        2                        1                        0                        1.0084623575582283
0.27777777777777873       1.9095792498413153       1.0113042867732178       1.3710257390737846E-4    1.0074663812008156
0.11111111111111205       2                        1                        0                        1.0103024101375893
0.16666666666666763       1.9095792498413153       1.0108493192957797       1.9492424065104092E-4    1.0092262060117452
8.881784197001252E-16     2                        1                        0                        1.0122287799189695
0.05555555555555645       1.9095792498413153       1.0102728895364503       2.4746813495927795E-4    1.0110975142992016
-1.5555555555555554       2                        1                        0                        1.03065717039322
-1.6128500850127505       1.910223340092154        1.0004691321895998       1.2013405261432191E-4    1.0308018390084257
-2                        1.5555555555555713       1                        0                        1.0318848986750955
-1.9080863325532134       1.6121446931272727       1.0000311698072215       2.3444872395631447E-4    1.0317111434569222
1.8888888888888704        -2                       1                        0                        0.9993727948730903
1.9444444444444267        -1.9095792498413153      1.0080582669232223       1.2671495583544432E-4    0.9994906677868106
0.701436                  -0.040795                0.8470424444657003       0.10500089448386475      0.9589647406560387
0.7084894577608575        -0.05020739346775303     0.846840392717375        0.10254993522794385      0.9619640244255144
0.129044                  0.065339                 0.8756047996724724       0.1378655789024706       0.7281425695085608
0.1325037364306225        0.07374120472582081      0.8971621739557128       0.12879691203359853      0.7424859846431581
-0.11111111111111027      2                        1                        0                        1.0141976971761981
-0.05555555555555471      1.9095792498413153       1.0095930000325266       2.9226808167379694E-4    1.0130391071222002
-1.4444444444444442       2                        1                        0                        1.030229445799386
-1.5012399261540388       1.9095938026185126       1.0007636449906798       1.512827369993415E-4     1.030419576027552
-1.333333333333333        2                        1                        0                        1.0296717334452685
-1.3893087906417818       1.910448048095131        1.001117878629284        1.767142022839538E-4     1.029910627653693
-1.2222222222222219       2                        1                        0                        1.0289797976006858
-1.2782663839106945       1.91020642751549         1.0015435840223958       2.0511364239277695E-4    1.0292753515447826
-0.22222222222222143      2                        1                        0                        1.0161650963838067
-0.16666666666666585      1.9095792498413153       1.008831526425613        3.2694976201127005E-4    1.0150069412733569
-1.1111111111111107       2                        1                        0                        1.0281457957605977
-1.1671025943597901       1.909910376233568        1.0020389965787395       2.3491697466619598E-4    1.0285003172372351
-0.9999999999999997       2                        1                        0                        1.0271617262987303
-1.0557803774763734       1.9097655213888116       1.002602444039329        2.642838462477047E-4     1.027576762634906
-0.3333333333333326       2                        1                        0                        1.018089366944834
-0.277777777777777        1.9095792498413153       1.0080139263674448       3.502771921549722E-4     1.016957453625606
-0.8888888888888884       2                        1                        0                        1.0260215487973905
-0.944568358877626        1.9096890274981844       1.0032323113400954       2.9207137298527345E-4    1.0264998551351197
-0.7777777777777771       2                        1                        0                        1.0247233658703456
-0.8334019153892757       1.909643942518511        1.0039259722406755       3.174697464011868E-4     1.0252658925817457
-0.44444444444444375      2                        1                        0                        1.0199337668821515
-0.38888888888888806      1.9095792498413153       1.0071665306788928       3.621265411392378E-4     1.0188504534060598
-0.5555555555555549       2                        1                        0                        1.0216680432110878
-0.5000018337513694       1.9095805703349018       1.0063141932307114       3.632756133386909E-4     1.0206514189359897
-0.6666666666666661       2                        1                        0                        1.0232695364109103
-0.7222570809909358       1.909608997860161        1.0046780151355927       3.3906137119594604E-4    1.0238750594452108
-0.6111225194934801       1.9095879816576016       1.0054787328920514       3.5499232198177305E-4    1.0223328392111375
-2                        1.4444444444444597       1                        0                        1.0322638248367335
-1.9085033093369914       1.5029761054567832       1.0000286739599178       3.1097040015106223E-4    1.032038938037713
1.777777777777759         -2                       1                        0                        0.9992906120838093
1.833333333333315         -1.9095792498413153      1.008376004987509        1.393835031105003E-4     0.9994052207095779
0.689844                  -0.042228                0.8500557435758406       0.10472926360973549      0.9541313476985366
0.6969000842859906        -0.051664671235570996    0.849963843662393        0.10239969847942927      0.9572075387283957
0.120071                  0.06385                  0.8656120165698193       0.15113401993399045      0.728810908059078
0.12332266997217073       0.07203818818454248      0.8887262646960238       0.14161999907583708      0.7434762071869909
-2                        -1.8888888888888884      1                        0                        1.031344043219212
-2                        -2                       1                        0                        1.031317835430702
-1.9271824112646414       -1.9247215877751227      1.0000204195090152       -1.995908029307433E-5    1.0313245810367893
-1.888888888888924        -2                       1                        0                        1.0313051807609404
-2                        1.3333333333333481       1                        0                        1.0327270015531935
-1.9087220718263946       1.3902080120799718       1.0000266506491648       3.8030288057867406E-4    1.0324658254842083
1.6666666666666476        -2                       1                        0                        0.9992336664365622
1.7222222222222034        -1.9095792498413153      1.008720156177726        1.518491695940455E-4     0.9993387837581015
0.678266                  -0.043649                0.8530437285524849       0.10431729021295118      0.9493538295946067
0.685328649883313         -0.05311804674112979     0.8530552903121383       0.10209158341404224      0.9525130735528983
0.666701                  -0.045058                0.8559802336139196       0.10387117359320504      0.9444411904020612
0.6737672302685506        -0.05452605984298418     0.8560923291613678       0.10171844672566832      0.9477670972489022
0.655152                  -0.046453                0.8588970327911877       0.10323196234943488      0.9396144286824405
0.6622204760649623        -0.05590992802527189     0.8591211504522408       0.10121994079428949      0.9430211360833063
0.643618                  -0.047832                0.8617940619830072       0.10250090702245425      0.9347786134941471
0.6506745801660524        -0.05726559723237978     0.8621269647639421       0.10057428735546543      0.9383118077832009
0.6321                    -0.049194                0.8646651947741066       0.10158416695320784      0.9300345145840582
0.6391326320759257        -0.05862002910813594     0.8651251431935393       0.09980706876544733      0.9336201161379404
0.620598                  -0.050536                0.8675302535384578       0.10055292786440849      0.9253124012958533
0.6276063773008879        -0.059969024681595935    0.8681057247946161       0.09885415479253395      0.9289989310950038
0.111388                  0.06225700000000001      0.8543130141987006       0.16452585264545835      0.7294784567109152
0.11442132429383639       0.07020570010654816      0.8790526650185813       0.15469517576321778      0.7449978938430074
-2                        -1.7777777777777768      1                        0                        1.0314505730573102
-1.916773416986748        -1.8327413932841654      1.0000218178355917       -8.046319066533924E-5    1.0313777307381782
-1.7777777777778123       -2                       1                        0                        1.0312145278209015
-1.8302497504475355       -1.9019776567025606      1.0001001121763127       -6.794378820682846E-5    1.0312687986313092
-2                        1.2222222222222365       1                        0                        1.0332666641535153
-1.9091667248070483       1.2784387821133105       1.0000229631992508       4.4133175973040456E-4    1.032973127102924
1.5555555555555358        -2                       1                        0                        0.9992148065099936
1.6111111111110918        -1.9095792498413153      1.0090883941159723       1.6338029187259673E-4    0.9993023152451662
0.609111                  -0.051858                0.8703556039643785       0.09937741347557277      0.9206419044974087
0.6161020863028338        -0.06130435001855843     0.8710608043023491       0.0978103806098209       0.9243755086133522
0.103029                  0.060568                 0.8415636350637706       0.17833039939875847      0.7317221163199589
0.10583648174413275       0.06824059853597961      0.8680978067237105       0.16810590189947702      0.747385914873424
-2                        -1.6666666666666652      1                        0                        1.0316435838447944
-1.9134792415739852       -1.723726350759368       1.000026655074098        -1.4993587440959518E-4   1.0315187352820139
-1.6666666666667007       -2                       1                        0                        1.0310181488424457
-1.715774955176811        -1.9104330819725721      1.000253639777167        -9.438958593892506E-5    1.031102381232843
-2                        1.111111111111125        1                        0                        1.033870099540478
-1.9093971098729627       1.1669338706981007       1.000018302780702        4.929255844491053E-4     1.0335505687508153
1.444444444444424         -2                       1                        0                        0.9992496945777067
1.4999999999999802        -1.9095792498413153      1.0094763118289087       1.7302030105491986E-4    0.9993094281502816
0.597637                  -0.05315700000000001     0.8731761433555101       0.09803422554485387      0.9160876205416163
0.6046111571416701        -0.06260063242604295     0.8739860308050792       0.0965865378419042       0.9198648284949044
0.095027                  0.058790999999999996     0.8274895002978724       0.1924076322531869       0.7360439139633282
0.0976018300960975        0.06615082534856685      0.8556858202336414       0.18194442565909466      0.7514956578874462
-2                        -1.5555555555555536      1                        0                        1.031930036559117
-1.9105054479634507       -1.6127170246915172      1.0000294445730866       -2.3031177655559803E-4   1.0317559529562423
-1.555555555555589        -2                       1                        0                        1.0307055535865155
-1.6080909636295497       -1.9095680667030304      1.0004780887812361       -1.2084864145977499E-4   1.0308349418413856
-2                        1.0000000000000133       1                        0                        1.0345216663367176
-1.909569142590443        1.0557406776949239       1.0000126440986408       5.317157863444431E-4     1.0341834219891
1.3333333333333126        -2                       1                        0                        0.9993567535804232
1.3888888888888682        -1.9095792498413156      1.0098769541671315       1.795892665649485E-4     0.9993764956455934
0.586177                  -0.05443300000000001     0.8759411781765479       0.09671006859007432      0.9112864644332554
0.5931358130806632        -0.06388567963086117     0.87685858502532         0.0952983204190246       0.9152679903021577
0.57473                   -0.055685                0.8786781121272359       0.09512087800970831      0.9067113608852048
0.5816638596814617        -0.06514820424794704     0.8797314796199194       0.09389361698497224      0.9106731829021427
0.087414                  0.056939                 0.8120257384095751       0.2065243702311147       0.7414894822156654
0.08973951200552155       0.06400910026729116      0.8419605770131658       0.19591725956443173      0.7571157721305027
-2                        -1.444444444444442       1                        0                        1.0323077455870369
-1.9106526313615066       -1.5010171551759612      1.0000278092273207       -3.029634940459798E-4    1.0320902644125682
-1.4444444444444775       -2                       1                        0                        1.0302783583513877
-1.4987239587441368       -1.9089442890471136      1.000769945907883        -1.514386975469929E-4    1.0304575123277593
-2                        0.8888888888889017       1                        0                        1.0352025769903082
-1.9096493864632003       0.9446066940415779       1.0000060700416586       5.555799594488946E-4     1.0348555560673363
-2                        0.7777777777777901       1                        0                        1.0358911383605625
-1.909658295333598        0.8334670431261494       0.9999986050764121       5.618142007600173E-4     1.0355470621872487
-2                        0.6666666666666785       1                        0                        1.0365630988218937
-1.909629996315383        0.7223253659673933       0.9999904558492109       5.48260291830942E-4      1.0362348144484865
1.2222222222222012        -2                       1                        0                        0.9995568225223165
1.277777777777756         -1.9095792498413162      1.0102804313222882       1.8173163179227306E-4    0.9995225155589899
0.563294                  -0.05691                 0.8814005909071506       0.09347901550862685      0.9021054018722187
0.5701939883649654        -0.06637708990872937     0.8825576352766585       0.0923047893965442       0.9061888638800594
0.551871                  -0.058109                0.8840522455074676       0.09173718407255833      0.8974117700818707
0.5587396188660948        -0.06758348580114229     0.8853383837363095       0.09068441740300032      0.9015991714938156
0.080213                  0.055026000000000005     0.7952094090720193       0.22048810598131688      0.7478762324849292
0.08228730909125982       0.06178623083516768      0.8267881029329177       0.2098891756000141       0.764040309642247
0.07344                   0.053067                 0.7768657253942491       0.2343584899471912       0.7569570178581468
0.07526740357715858       0.05950248079021733      0.8102114617144718       0.2237673646067069       0.7724510955389315
-2                        -1.3333333333333304      1                        0                        1.0327701135510878
-1.9106221503791665       -1.3896216030823658      1.0000252698176448       -3.715513796235821E-4    1.0325130045442028
-2                        -1.2222222222222188      1                        0                        1.0333081000678916
-1.9099750642867468       -1.278373450706864       1.0000223862853088       -4.35831414849696E-4     1.0330159645048165
-1.333333333333366        -2                       1                        0                        1.029723672812533
-1.388414759986766        -1.9090705739081348      1.0011259750988704       -1.7968077463135265E-4   1.0299562930914918
-2                        -1.1111111111111072      1                        0                        1.033909675387379
-1.909815469821447        -1.1669195640816221      1.0000180359293747       -4.887283199221374E-4    1.0335912483216712
-2                        -0.9999999999999956      1                        0                        1.034559204618073
-1.9096970785401917       -1.0556618679487333      1.0000125189427662       -5.288491788242952E-4    1.034222505032549
-2                        0.5555555555555669       1                        0                        1.0371925309070367
-1.9096006668282188       0.6111814522976157       0.9999819969728229       5.135172138275271E-4     1.0368933590179525
-2                        0.4444444444444553       1                        0                        1.0377532228654291
-1.9095839080191421       0.5000390813548624       0.9999737167277135       4.5728327135308074E-4    1.0374961179020608
-2                        0.3333333333333437       1                        0                        1.0382203119845954
-1.9095793178133647       0.3889071208316712       0.9999662011968518       3.8070779050409733E-4    1.0380170187210729
-2                        -0.888888888888884       1                        0                        1.0352377083594684
-1.9096481798298706       -0.9444883331888048      1.0000059367489476       -5.532516446590539E-4    1.0348927884669419
-2                        -0.7777777777777724      1                        0                        1.0359232398286389
-1.9096123420854632       -0.8333520089847584      0.9999984391587352       -5.597104733457291E-4    1.03558162255129
-2                        -0.6666666666666607      1                        0                        1.0365915506861305
-1.9095896154502956       -0.722228820096304       0.9999902842712621       -5.459460530450938E-4    1.0362658367222009
-2                        -0.5555555555555491      1                        0                        1.037216859689116
-1.9095810139635685       -0.6111123570411438      0.9999818089527762       -5.107189205932083E-4    1.036920237570891
-2                        -0.44444444444443754     1                        0                        1.0377730114203696
-1.9095793453493792       -0.5000000178197609      0.9999734959166889       -4.5397167577577833E-4   1.0375184472535606
-2                        -0.33333333333332593     1                        0                        1.0382350923122967
-1.9095792463185768       -0.38888888080821954     0.9999659369628789       -3.7687534486456885E-4   1.0380344713836607
-2                        -0.22222222222221433     1                        0                        1.038581363276943
-1.9095792383567725       -0.27777774897011204     0.9999598398506705       -2.8230656812976417E-4   1.0384443877524079
-2                        -0.11111111111110272     1                        0                        1.0387951881293491
-1.9095792149617095       -0.1666665682617153      0.9999556357310749       -1.7429563600317386E-4   1.0387284653510227
-2                        8.881784197001252E-15    1                        0                        1.0388660945075348
-1.9095791531487363       -0.055555235513070685    0.9999532775175456       -5.771172638044639E-5    1.0388729112935742
-2                        0.11111111111112049      1                        0                        1.0387905592831623
-1.9095790131585941       0.05555653903925049      0.9999533578509547       6.205244345351559E-5     1.0388705442198392
-2                        0.2222222222222321       1                        0                        1.03857185064409
-1.9095787703694607       0.166669495841976        0.9999552799257482       1.788889171173381E-4     1.0387215249700894
-1.90957858353098         0.2777853070030847       0.9999598957782609       2.865695974665024E-4     1.0384322433250295
1.1111111111110894        -2                       1                        0                        0.9998724026176232
1.16666666666664          -1.909579249841319       1.0106737148543419       1.7798966615888837E-4    0.9997686609697846
0.540458                  -0.059279                0.8866941056292782       0.08982685981315101      0.8928260638784996
0.5473026707681254        -0.06874471542598187     0.8880905004459878       0.08888411946543605      0.8970730556696093
0.529057                  -0.06042                 0.8892708236415817       0.08786032168059099      0.8881308010792468
0.5358880967428524        -0.06989420862866383     0.8907901646279656       0.08701365806534407      0.8925196431289736
0.067105                  0.05107500000000001      0.7573572824760477       0.2480337982108091       0.7688416887761494
0.06869318083829756       0.05719375007581423      0.792219185532007        0.23757676206524345      0.7836619025954382
-1.2222222222222543       -2                       1                        0                        1.0290335680054254
-1.2776292941834322       -1.9093778598906355      1.001546810946356        -2.074540230085299E-4    1.0293232432969888
0.9999999999999776        -2                       1                        0                        1.0003264536140724
1.0555555555555087        -1.9095792498413326      1.0110407045067167       1.6694876390912873E-4    1.0001374099325184
0.517668                  -0.06153                 0.8918160036986883       0.08572458259662787      0.8834886600846007
0.524481445776447         -0.07101072274556779     0.8934609991706283       0.08500219311132647      0.88795870175204
0.061209                  0.049066                 0.7366495039425649       0.2610225459738242       0.7815391638742262
0.06256738189987342       0.054865682549713614     0.7728518898630723       0.2508656918202193       0.7964013400305427
0.8888888888888662        -2                       1                        0                        1.0009407509657657
0.9444444444443091        -1.9095792498413948      1.0113626961932354       1.4742574626513136E-4    1.0006512206676064
-1.1111111111111427       -2                       1                        0                        1.0282002794728258
-1.1666640331556097       -1.9095818804183942      1.0020349377289166       -2.352219342549118E-4    1.0285503970737844
0.506292                  -0.062608                0.8943083136765327       0.08351457895373875      0.8787602025151021
0.5130827974592495        -0.0720945642732229      0.896080864409161        0.08288359370726993      0.8833844197580788
0.055741                  0.047053                 0.7147899405649044       0.2732802247105793       0.7955949629310325
0.05688217101834883       0.05253119716377203      0.7522175544721713       0.2635115406462485       0.810446928935778
0.7777777777777548        -2                       1                        0                        1.0017338510974636
0.8333333333328046        -1.9095792498416742      1.0116193051693945       1.186693764966036E-4     1.0013307832190705
0.666666666666643         -2                       1                        0                        1.00271890568763
0.7222222222199712        -1.909579249842907       1.0117898357068607       8.059384547344583E-5     1.0021929259179159
-1.000000000000031        -2                       1                        0                        1.027217441154093
-1.0555510882785164       -1.9095911107860803      1.002593490037656        -2.6350146927739713E-4   1.0276299847828592
0.4949279999999999        -0.063653                0.8967503970069267       0.0811561247321117       0.8740290647195025
0.5016854301975618        -0.07315103590272932     0.898669877405685        0.08064656756711536      0.8787610308999545
0.050685                  0.045047                 0.6917835990668287       0.28478783475918207      0.812005292007108
0.05162239523712192       0.05020942855672763      0.7304150270639784       0.27545701275566475      0.8262272913175756
-0.8888888888889195       -2                       1                        0                        1.026079908493328
-0.9444437687292343       -1.9095949893294744      1.0032197408588344       -2.9115894791496383E-4   1.0265562828235082
0.5555555555555314        -2                       1                        0                        1.0039016049700293
0.6111111111014718        -1.9095792498482462      1.011855050071811        3.3934034103680116E-5    1.0032484267644246
0.4444444444444198        -2                       1                        0                        1.0052783687672942
0.4999999999594214        -1.909579249870852       1.0117990861864514       -1.9745870362860673E-5   1.0045000488830447
-0.7777777777778079       -2                       1                        0                        1.024784888609465
-0.8333372815878866       -1.9095930770361074      1.0039104555912646       -3.1656211667181186E-4   1.025325969566455
-0.6666666666666963       -2                       1                        0                        1.0233344093431362
-0.7222274582306344       -1.9095883889470915      1.0046600561324135       -3.381864511493558E-4    1.023938786258716
-0.5555555555555847       -2                       1                        0                        1.0217364592228093
-0.6111149404845669       -1.9095840774586759      1.0054591180720776       -3.542723907250247E-4    1.0224002252090665
0.33333333333330817       -2                       1                        0                        1.0068355025888835
0.38888888872231236       -1.9095792499641124      1.0116112790145608       -7.794082664241357E-5    1.0059409443818497
0.22222222222219656       -2                       1                        0                        1.0085495467936458
0.27777777711456514       -1.9095792503375204      1.0112877935385016       -1.3747861890298663E-4   1.0075540576201323
-0.44444444444447306      -2                       1                        0                        1.0200058755260688
-0.5000020246981747       -1.9095813812178637      1.006293944109933        -3.628557531083157E-4    1.0207224074800816
0.11111111111108496       -2                       1                        0                        1.0103883951835642
0.16666666412021441       -1.909579251781124       1.0108323211183974       -1.9511211138378997E-4   1.0093127726902649
-2.6645352591003757E-14   -2                       1                        0                        1.0123128047043775
0.05555554619312394       -1.9095792571349006      1.0102556569461465       -2.4783248789233316E-4   1.011182422500365
-0.11111111111113825      -2                       1                        0                        1.0142793254218572
-0.0555555882139269       -1.9095792760210146      1.009574981472438        -2.9262873951346177E-4   1.013121965918726
-0.33333333333336146      -2                       1                        0                        1.0181650318772544
-0.38888975670736675      -1.9095800677775963      1.007146398352308        -3.6204539860804595E-4   1.0189249087846088
-0.22222222222224985      -2                       1                        0                        1.0162439391673095
-0.277778099002668        -1.9095795312607349      1.0079943498573074       -3.5040219840537274E-4   1.0170350406073017
-0.1666667734066397       -1.909579338683845       1.008812682026582        -3.2720084132255696E-4   1.0150873327634962
0.483579                  -0.064663                0.8991451635708424       0.07865765424332555      0.8693075151173805
0.49027546339561945       -0.07418775070290326     0.9012269525358735       0.0782589302917633       0.8741552677324095
0.046025                  0.043058                 0.6678234015433911       0.2954950377236481       0.83186913896171
0.04677491333589733       0.04789435633524767      0.7073311017717082       0.2866828261099128       0.8445034503739907
0.4722430000000001        -0.065637                0.9014810496249849       0.0760267986256188       0.8645645439442626
0.4788522252202095        -0.07518786092372796     0.9037378948874731       0.07573618753783767      0.869519441073641
0.041736                  0.041093                 0.6432286169604297       0.3049970284593203       0.8514817847936582
0.04231540385325602       0.04561743110249955      0.6831923817102812       0.2968899547097508       0.8645360141347335
0.460924                  -0.066573                0.9037630167719207       0.0732278502238018       0.8598319308036814
0.467438151590942         -0.0761242073699742      0.9061872602033015       0.07306815250239333      0.8648925535285672
0.037793                  0.03916                  0.6177494864208245       0.31315892520211935      0.870618353166932
0.03821871425270225       0.0433882914929404       0.6583111161126256       0.3058030571759906       0.8842607482486954
0.449619                  -0.06747                 0.905982456632008        0.07037855584867743      0.8548815219247041
0.4560551456307114        -0.07699265820500605     0.9085594361284618       0.07028036384557602      0.8601697045365907
0.034168                  0.037261                 0.5914988190815578       0.32025564546167373      0.8923746179534641
0.034457498761784215      0.04121250719947906      0.6327065927682569       0.3136716355494569       0.9057037011212404
0.438331                  -0.068327                0.9081227269218196       0.06724169013000963      0.8501466851008549
0.44470771200238923       -0.07780930548203283     0.9108914258200352       0.0673649917801362       0.8554399498648618
0.030837                  0.035398                 0.5644765127525811       0.32626311630208416      0.9182184823963747
0.031004345230220887      0.03909219316671692      0.6063853302768741       0.32051524735812637      0.9295946006037915
0.42706                   -0.06914                 0.9102317204032753       0.06398945288193432      0.8453862229821242
0.4333905514956009        -0.07858644083935322     0.9131474904693583       0.06420713811120038      0.8508442045068731
0.027777                  0.033571                 0.5368937050315374       0.3312652924696328       0.9498595466028968
0.027833642059632527      0.03702753997013471      0.579319574854919        0.32633583198693944      0.9574407033004536
0.415807                  -0.06991                 0.9122125995735222       0.060601280069181286     0.8405287009792363
0.4220950954761664        -0.07932788067590518     0.9153256765448932       0.06098949861439824      0.8461148506875752
0.024965                  0.03178                  0.5092725242294855       0.33478622981369427      0.9790982221690662
0.024921516588549936      0.03501737823389716      0.5516282561309941       0.3307848834889168       0.9875910647949221
0.40457300000000007       -0.070633                0.9141469002466479       0.056971588998543966     0.8357841494735069
0.4108154653195013        -0.08003711493716927     0.9174463747109568       0.057523674633158016     0.8414881748152668
0.022377                  0.030026000000000004     0.4812501930579535       0.3364465659539387       1.0029378856463207
0.022245341351819912      0.033060113895953626     0.5237548392664159       0.33348271638689625      1.0146125271402744
0.393359                  -0.071309                0.9159598839438928       0.05331883574313418      0.8306951453308192
0.39955157712498846       -0.08071665514704929     0.9194721095283632       0.05395897392503277      0.8367258067709001
0.019994                  0.028308                 0.452552884203096        0.3367767356965115       1.0315160962829855
0.01978436242126882       0.03115358647538206      0.49565806196777595      0.334837798427311        1.0422743096602154
0.382166                  -0.071936                0.9176712925456826       0.049314193954363796     0.8258683108822277
0.3883050612849484        -0.08135922207551194     0.9214602283107675       0.05019485118407382      0.8319461501804472
0.0178                    0.026623                 0.4234314196353149       0.33591131858878875      1.0666658876191553
0.017520584003295335      0.029294723595448532     0.4670783039180673       0.3350716804872021       1.0750269130256032
0.370998                  -0.07251                 0.9193092794590818       0.04512873234905628      0.8210695406078076
0.3770775514862723        -0.08195054028596807     0.9233437416645954       0.04616038033746595      0.8273460112416068
0.015782                  0.02497                  0.39407173371099025      0.33363980463627985      1.1060188842652476
0.01543864695649523       0.027480434480802535     0.43807875102211574      0.3340036569277433       1.1116060852764937
0.359853                  -0.073031                0.9207965074966525       0.040835306001609124     0.8160013245652139
0.36587175409118355       -0.08248198531058705     0.9251061552551533       0.04200898357907585      0.8225782124044884
0.013927                  0.023347                 0.3644655795352836       0.3300130239982559       1.1537434024899444
0.013524993897800021      0.02570795123413421      0.40877484330448294      0.3315254646480191       1.1525133708890305
0.348736                  -0.073496                0.9221604961184243       0.03619494096243105      0.8111784244350221
0.35469105095604164       -0.08294970355839995     0.9267817026665471       0.03761718990137477      0.8178467061942242
0.012223000000000001      0.021752                 0.33554473504324106      0.3247777408162119       1.195629919437237
0.011767048483558327      0.023974610262524423     0.3792760919206775       0.32738515026232856      1.1971505830093137
0.337647                  -0.073902                0.923399815558512        0.03137775420226408      0.8063026955985229
0.34353622027994724       -0.083350678824752       0.9283110563912053       0.03297438093687182      0.813218009983827
0.010657                  0.020186                 0.3064975422397534       0.3173236606322934       1.2342176188392857
0.010152947813869618      0.02227847698213116      0.35024427027918476      0.32119558136636006      1.2352614075617991
0.326588                  -0.074248                0.9244572754653593       0.026376599050185454     0.801236538431704
0.33240688279215863       -0.0836865584434928      0.9296978565419657       0.028166079570681225     0.8084562567503984
0.00922                   0.018646                 0.2776889738188779       0.30848633030896316      1.2817561737421594
0.008672138550356511      0.020617723322753963     0.3213025955542101       0.3134675928873509       1.2791482782073234
0.315563                  -0.074531                0.9253464049225242       0.02106280215591283      0.7962889346373473
0.32130775849894616       -0.08396118074056197     0.9309594683678067       0.023094631949048792     0.8037146257732256
0.007904                  0.017132                 0.24939469879428286      0.2976755569405251       1.325302822086021
0.007315659502239127      0.01899055078424652      0.2926710382521786       0.3038582105564189       1.3235330877652771
0.304574                  -0.074748                0.9260473953250771       0.01543919786581825      0.7914598480419
0.310244909217467         -0.08417345403553915     0.9320603426562694       0.01774023013218462      0.7990951176509932
0.006701                  0.015643                 0.2214251071131074       0.2849518215088496       1.3721794899714241
0.006075470908477442      0.017395823009084134     0.26456479207916517      0.2923672179817731       1.367282300678088
0.293625                  -0.074896                0.9265450437556292       0.009571834493814121     0.7866322352791055
0.29922038075132956       -0.08426436874323118     0.9329246817206708       0.012113088471905684     0.7945018674632349
0.005606                  0.014179                 0.1942640852753544       0.2704422642296686       1.417384193262919
0.004944283599850272      0.015832799618982107     0.23698604844819712      0.2790085338741297       1.4137907387309179
0.282717                  -0.074973                0.9267985844858934       0.0034643791398412675    0.7816260139555714
0.2882337041224478        -0.08433217791993741     0.9336251738921026       0.006243394151102556     0.7898609826415628
0.004611                  0.012738                 0.16776120112733264      0.2536601055706965       1.4569530055795503
0.003914721091401867      0.01430050352498504      0.21033080609533086      0.2635975906785231       1.4562877188325112
0.271857                  -0.074976                0.926782167344315        -0.003033799171680012    0.7768582457620224
0.277290572313043         -0.08433225645252782     0.9341324788641466       7.121337256737159E-5     0.7852877590297465
0.003712                  0.011319                 0.14188628977351203      0.2348286827641355       1.4992628021239796
0.0029796760785555016     0.012796939500044869     0.18456762267175275      0.24630018530107253      1.4999744864997064
0.261048                  -0.074901                0.9265108439031047       -0.009824175721137779    0.7719914334115053
0.26640145047530894       -0.08431214148916903     0.9344423164913721       -0.006448930389189604    0.7808871772641318
0.002906                  0.00992                  0.11671751441277595      0.21378732787422564      1.5453770514352472
0.0021338264364545423     0.011318547981886721     0.15970743579892419      0.22709378789108473      1.5467578793814944
0.250295                  -0.074746                0.9258795425221367       -0.017000265022490742    0.7672529634459245
0.2555573420096214        -0.08417497184609886     0.9344648934843615       -0.013255700125213219    0.7764722041458755
0.002193                  0.00854                  0.09230352612649467      0.1905580005336723       1.6058217340355385
0.0013748663389580517     0.009860224544433601     0.1357295861632337       0.20597454436984605      1.6004402528049624
0.23960400000000004       -0.074506                0.9249398676306068       -0.02454738233040314     0.7626264691224959
0.24476134621075293       -0.08392940223332525     0.9341676905691028       -0.020487865319785286    0.7722443320554734
0.0015759999999999997     0.007179                 0.06929981180523419      0.16539476696878305      1.6790462189151485
7.045497659943379E-4      0.008416659823950828     0.11264933640638575      0.18282436248370185      1.6661122827058958
0.228982                  -0.074179                0.923557830421703        -0.032491898037751696    0.7580599455424796
0.23401814465941276       -0.08359611260071186     0.9335406906344444       -0.028038066066569525    0.7680713922692265
0.001055                  0.005831                 0.04813687602024505      0.13797233280954252      1.7666202987146147
1.273463677067994E-4      0.006983198159608288     0.09094721185183853      0.15741287829144726      1.7387353413516722
0.21843600000000002       -0.07376                 0.9217772157193181       -0.04085355307266328     0.7536999657121152
0.22334211261113796       -0.08309397547594904     0.9324511170338715       -0.03604218795816674     0.7640788782926599
6.35E-4                   0.004494                 0.02974272501490884      0.10887776194248067      1.8672293864218894
-3.509459251152441E-4     0.005557657591310235     0.07108144105388096      0.12966680516719606      1.820989167885741
0.207976                  -0.073247                0.9194773023189574       -0.049540512453700856    0.7491770101555933
0.21274645597424902       -0.08253171787410779     0.9309866459216626       -0.044383441956692214    0.7601054441281212
3.21E-4                   0.0031740000000000006    0.015276769702766042     0.07849870270823862      1.9553160057942234
-7.243374035755646E-4     0.004142422370900868     0.054132590065077583     0.0995484719801918       1.900489056355411
0.19761299999999998       -0.072636                0.9166185624497806       -0.058823429586670826    0.7450788389212045
0.20223133190434336       -0.08191755133368288     0.9291639915498334       -0.053198384211602334    0.7564103639467525
1.14E-4                   0.001882                 0.005307598721084979     0.04723562829386374      2.02241599591074
-9.882526781887363E-4     0.0027427357492314404    0.04123182461901315      0.06748381575153872      1.9638102316432742
0.187358                  -0.071922                0.9131633224896075       -0.06867682860442156     0.7416086134862668
0.1918324851587022        -0.08114853012390374     0.9267502466817986       -0.06254396897842139     0.753236866063795
1.3E-5                    6.23E-4                  2.422795959231033E-4     0.0159042744291264       2.060968784006186
-0.0011377738057181926    0.0013599401962896829    0.03294308389923136      0.0340837306139394       2.007939571831812
0.177226                  -0.071102                0.9090709235993563       -0.0788164871834769      0.7378380226382314
0.18155236370804506       -0.08025475785080954     0.923698018713439        -0.07232543845090723     0.7502810479727584
1.3E-5                    -6.23E-4                 2.2387619230238747E-4    -0.015474818720628688    2.0613330301271233
-0.0011815725773919035    -4.777574840658943E-7    0.030010549592809823     2.4141183313878148E-4    2.0236094327637937
0.167232                  -0.070175                0.904086476147269        -0.08960636513028479     0.7346968445647327
0.17140081452709188       -0.07923767748562253     0.9200292500097041       -0.08251165126407257     0.7474979941187724
1.14E-4                   -0.001882                0.005259147592895784     -0.0468250615276166      2.0231545125357675
-0.0011422770642017682    -0.0013630707962064281   0.03305117551925559      -0.033660362052113556    2.0082107299183014
0.157394                  -0.069135                0.8983733098404484       -0.10095779144044852     0.7324344660997713
0.16140904506397602       -0.07802593369403082     0.9154681458834065       -0.09338317818598503     0.7455459845181136
3.21E-4                   -0.0031740000000000006   0.015199887841472        -0.07811220079146192     1.9564248706409577
-9.899921820679277E-4     -0.00274290598828069     0.0412245530819986       -0.0670196235355268      1.9647391748957308
0.147735                  -0.067983                0.8916399950972987       -0.11271865494994138     0.7303914892234123
0.15157554623823047       -0.07672623778048603     0.910121919945497        -0.10464306258924753     0.7439660205048074
6.35E-4                   -0.004494                0.02964006885197776      -0.10850919845591935     1.868147259208258
-7.251767634267279E-4     -0.004142245435034444    0.05405460961128105      -0.09910550809517492     1.901469456452059
0.138276                  -0.066717                0.8839431040342328       -0.12498783192541128     0.7289032790151423
0.14192949561991244       -0.0753031950249236      0.9038703933338891       -0.11644820837050994     0.7430508046152906
0.001055                  -0.005831                0.048007662723982596     -0.13760612831918334     1.7674365667809004
-3.526766967115961E-4     -0.005557930279661682    0.07098283782725119      -0.12924494575139825     1.821826336136205
0.129044                  -0.065339                0.8750210548116001       -0.137769310729682       0.7285305240711399
0.13249807876872405       -0.07375137758595494     0.8966089929364233       -0.1286884724518593      0.7428386849011527
0.0015759999999999997     -0.007179                0.06914010589492298      -0.16501669672693312     1.6799299727531007
1.2439867445980654E-4     -0.006983692806020757    0.09082779558813163      -0.15698993570060105     1.7395996315943922
0.120071                  -0.06385                 0.864998074002831        -0.15102304253727258     0.7291048391081195
0.12331104420499155       -0.07207144569119577     0.8882068749753894       -0.14149264085983695     0.7438412279144896
0.002193                  -0.00854                 0.09210956880869493      -0.19015903135947307     1.6069300960486093
7.002567150650891E-4      -0.008417330809169956    0.11250578573344404      -0.18238572995059532     1.667127047889278
0.111388                  -0.06225700000000001     0.8536537376808179       -0.16441656511573985     0.7295602656044773
0.11440956659445393       -0.0702399326691004      0.8785121705960971       -0.15453758801119807     0.7453401282738207
0.002906                  -0.00992                 0.11648365181017724      -0.21335744482136487     1.5468415425030229
0.0013698545656147096     -0.009860939203834728    0.13554406718076065      -0.2055149186344348      1.6016627603817464
0.103029                  -0.060568                0.8408436847867532       -0.1781896563564501      0.7317917792310101
0.10584069103975659       -0.06820574252329792     0.8673212453325164       -0.16794092170158706     0.7475393288247344
0.003712                  -0.011319                0.14160795062301887      -0.2343641503371456      1.501064132892073
0.002129631522936692      -0.011318725940028071    0.159447989292915        -0.2266108775597306      1.5481691673225104
0.095027                  -0.058790999999999996    0.8267129352797357       -0.19222468927718697     0.7362426256168453
0.09760919530714808       -0.06606978800807647     0.8547036058257733       -0.18179275926611171     0.7515040867010557
0.004611                  -0.012738                0.1674352287345334       -0.25316165201749846     1.4590251049933098
0.00297792306969906       -0.012795670114602002    0.18420461940237262      -0.245796105117795       1.5015509760428563
0.087414                  -0.056939                0.8112023417529216       -0.2063147943103323      0.7416845848644856
0.08974474844705216       -0.06393135884049261     0.8409252933517948       -0.1957540252499019      0.7570967618832687
0.005606                  -0.014179                0.19388779129719028      -0.2699133083505322      1.4196351328952705
0.003916547946368329      -0.014296841763905705    0.2098454457893644       -0.26307847629418196     1.4579728940833265
0.080213                  -0.055026000000000005    0.7943382092387244       -0.22025300884123014     0.7480361295606922
0.08229158134580139       -0.061711374139511166    0.8256979194772852       -0.20970644986169232     0.7640068494393547
0.006701                  -0.015643                0.22099714380684235      -0.28438997641430397     1.3743899345662258
0.004950578165804726      -0.015825660147176974    0.23635986979849524      -0.27848014582163166     1.4154660751081547
0.07344                   -0.053067                0.7759627049259562       -0.23406906547006612     0.7568233368810876
0.07527036951832389       -0.05942662851066396     0.8090508984621163       -0.22356535405631958     0.7723498767778844
0.007904                  -0.017132                0.24891032996341153      -0.29709967009520694     1.3270228419820127
0.006087269206618996      -0.01738361314353011     0.26377265428338964      -0.29182696380615464     1.3687781783800945
0.067105                  -0.05107500000000001     0.7563073266970384       -0.24780192921312327     0.7695058396601175
0.06869228554892248       -0.05709643099777971     0.790890010256208        -0.23740053931346242     0.783590130855436
0.00922                   -0.018646                0.27716325625989013      -0.3078949145592851      1.283124542399859
0.007328974892630607      -0.01897619645569384     0.2918128539183169       -0.30331035340870477     1.3248152107453226
0.061209                  -0.049065                0.7357470482408832       -0.26070608919821175     0.7816828774958585
0.06256400603719214       -0.05474278229090318     0.7712398324532596       -0.25076285840030393     0.7967314885849529
0.010657                  -0.020186                0.30592832924928887      -0.31674899223999003     1.2350151638611322
0.008686875172166791      -0.02059975940441058     0.3203644939837567       -0.31291327623478854     1.2801980750819315
0.055741                  -0.047053                0.713716495502117        -0.2727818154415258      0.7950054174092229
0.05688141259366186       -0.05238988267289112     0.750468035673055        -0.26324497789235307     0.8097568233609674
0.012223000000000001      -0.021752                0.3349549651712486       -0.3242105554950587      1.196719812713133
0.010162648817359623      -0.022266123720720912    0.34942255223161484      -0.3206500279007452      1.236257134486389
0.050685                  -0.045047                0.6907318318915903       -0.28437316575267463     0.812950200773035
0.0516253408954781        -0.050051597423960134    0.7284639684386782       -0.2753022856937006      0.8260712269023277
0.013927                  -0.023347                0.3638469039790318       -0.3294344638051962      1.1551944343631555
0.011776130539944711      -0.023962492531708467    0.3784512142924387       -0.32685601815815707     1.1981569368000102
0.046025                  -0.043058                0.6668078571927105       -0.2950339810797264      0.8329720541157529
0.04678080637557414       -0.047759542967569756    0.7054404668491427       -0.28650750507756945     0.8447143472414195
0.015782                  -0.02497                 0.3934140655539595       -0.3330993740963899      1.1068049617838336
0.013539879764554535      -0.025686284538301574    0.407772587866789        -0.33100728500161886     1.1533536704326461
0.041736                  -0.041093                0.6422856838070202       -0.3045305503421779      0.852966892395082
0.042324750085638324      -0.0455131921865588      0.6814778062734761       -0.2966714816512996      0.8649596814424215
0.0178                    -0.026623                0.4227653797220696       -0.3353787573695406      1.0675797376990297
0.015449947834402752      -0.027464446618527358    0.43718169028068093      -0.33350059284429584     1.112413200471213
0.037793                  -0.03916                 0.6168684348013299       -0.3127077232971764      0.8718753209199445
0.03822812420347924       -0.04332817388591925     0.6569528946707721       -0.3055122408756985      0.884893743365036
0.019994                  -0.028308                0.45186529850164187      -0.33626690995503933     1.0324610863457824
0.01753203588513855       -0.02927683931174177     0.46615832327774137      -0.3345908238096531      1.0757697102660158
0.034168                  -0.037261                0.5906697523127521       -0.31980666296516247     0.8934926588763165
0.034466319269934265      -0.04117051887124328     0.6315065012010916       -0.31333817416196613     0.9064204495507923
0.022377                  -0.030026000000000004    0.48054562038207993      -0.33595391015322956     1.0038376298147078
0.019795444355430184      -0.03113413104954219     0.49471663038148445      -0.334378034527727       1.0430058358194232
0.030837                  -0.035398                0.5636919368967486       -0.3258029885187612      0.9193625565407716
0.031013144312999504      -0.03905754481534446     0.6052606311464207       -0.32015494671045897     0.9303575212046274
0.024965                  -0.03178                 0.5085474411772237       -0.33430986585598993     0.9800773229101303
0.022255853885822654      -0.03303846138315641     0.5227895948642164       -0.33304678283649986     1.0153854012382808
0.027777                  -0.033571                0.5361398708606745       -0.33080330937367647     0.9508162262148497
0.027841572670111583      -0.03700285850245007     0.578311432188381        -0.3259457811614184      0.9582305579699747
0.024931116731811486      -0.03499410860085585     0.5506370282705464       -0.33037186660486517     0.9884097519462031
0.9829594564183125        0.003743754671915974     0.5350889601207635       -0.08344661346193881     1.2775468940882926
0.9827686315866614        0.0037750037801631883    0.5366137885130665       -0.08371908326485343     1.2743836054034052
0.9828849794224528        0.0038892100527050805    0.5360813709764831       -0.08255302603420395     1.2760653104657858
0.9831670864465014        0.0037375383914748186    0.5334937768408122       -0.08293481401485732     1.2812325129200441
0.983063994976695         0.003917767616377858     0.5348242453843927       -0.0818488961624998      1.2792589796870344
0.9906377771096461        0.0024866981279188954    0.4558531503738092       -0.06611605790473657     1.5029560812624305
0.9908097230688009        0.0024581605943414394    0.4534560429306311       -0.06569430433368094     1.5094708914527357
0.982570255760015         0.0038339718010670324    0.538259116210238        -0.08380290235209216     1.2706389407653924
0.9827300102856004        0.003975170424990657     0.5374984029779072       -0.08233282990110247     1.2729917938814994
0.9829260108486654        0.004098082480508823     0.5364314977463666       -0.08088107421200207     1.2763962952659067
0.9833989249611675        0.0037352087068910343    0.5317068246838117       -0.08231742109158964     1.2851534041057622
0.9832847307263165        0.003935637016320614     0.5332071927782972       -0.08109887082824511     1.2828173892193924
0.9831622390919165        0.0041204240315644266    0.5347381222072142       -0.08004798515657069     1.28012635490575
0.9907443582255522        0.0025884287159248895    0.45501349818667         -0.06429882815844273     1.5055980767467507
0.9904569689766896        0.0025403246497443647    0.4584498774513978       -0.06624987083502541     1.4951063853588307
0.9902547428247104        0.0026043515087754918    0.4613180227545332       -0.06635374867284376     1.4871789303724254
0.9906026576102162        0.0026687881919178723    0.45728119684459595      -0.06394111012931782     1.498381216519033
0.9909949078776409        0.002452859302964701     0.45096605282276064      -0.06489146548773962     1.5177615987132569
0.9909038681865514        0.0026152097861221464    0.45308780471209403      -0.06317926616847062     1.5124516210931116
0.9823488116321532        0.0039024462845116685    0.540084204906465        -0.0838787728990361      1.2665016785879646
0.98252421427476          0.004058583536759682     0.5392720845618556       -0.08227324627595893     1.2692790137810441
0.9827068787303825        0.004198651984933228     0.5383813216046484       -0.08074680151271414     1.2722828015177674
0.9828837490910408        0.0043437785542906554    0.5375710667787076       -0.07918204950309599     1.2745651796952393
0.9830627775081058        0.004275717516269949     0.5360102871923008       -0.07917145834728861     1.2785752154423484
0.9836557417089137        0.0037344812847547944    0.5297086472306373       -0.08160485850323268     1.28941284064782
0.9835283181176102        0.0039561519529397425    0.5314077093772142       -0.08024796556765569     1.2867446030298522
0.9833906081121717        0.004158814605952942     0.533143413247729        -0.07909827417884278     1.2838782904866173
0.9832455686451307        0.004339099085419972     0.5348696953963868       -0.07816481173787203     1.2811852200080907
0.9907808942355938        0.0027790964801476603    0.4556532381886341       -0.061667243762792485    1.504607444075967
0.9900307600619772        0.0026744695363975254    0.46442048270790565      -0.06648599994936104     1.4792090736702497
0.9904147316196655        0.002747512502965323     0.4600842522240778       -0.06383838014892669     1.4907286095757917
0.9902064823973732        0.002832313506388503     0.4631101207124145       -0.06377316989123939     1.4827281865002184
0.9905818048260213        0.0028731437345431       0.45873666599767765      -0.06146809448275869     1.4952184424435038
0.9912004752554074        0.0024513351656234267    0.44817898971346976      -0.06391490060083334     1.5269177914503358
0.9911001850031407        0.002631016604769245     0.4505899886311733       -0.06199597098300865     1.520380649833793
0.9909929772947271        0.002791704280009244     0.4530039770910572       -0.06043433551203326     1.5129591590748765
0.9821043674935           0.003979236677027843     0.5420796195391634       -0.08395634516063287     1.2618894948860861
0.9822976216566707        0.004150830691972743     0.541207595510301        -0.08221099637139874     1.2652484769623191
0.9824956640782295        0.004302333328496504     0.540265157816953        -0.08057573684185199     1.2685073638884867
0.9826887060490894        0.0044342164397554685    0.5393135864246598       -0.07907630819664475     1.2716184995842033
0.9839405892625668        0.0037350484000443335    0.5274662454362932       -0.08078521978459953     1.2940947859466438
0.9828532210690438        0.004539365397498562     0.5384910310877008       -0.07783687569148523     1.2743039793212005
0.9830645876931267        0.004517250597314336     0.5368594951541552       -0.07737765338300513     1.2778890527318467
0.9837985277468974        0.00397906395978512      0.5293904141521106       -0.07928163789667926     1.2911301704869222
0.9836443780263128        0.0042031599194346245    0.5313640966433554       -0.07800872559474538     1.2879977024798916
0.9834798588464553        0.004404170809621905     0.5333473868415269       -0.07697679373240697     1.2849433938884565
0.983309767907298         0.004599208885273607     0.5353555823143789       -0.0760352536319009      1.2815960754333593
0.9908993634867438        0.002931921327272802     0.4551228691128407       -0.05912187359422151     1.507856332436137
0.99074068560289          0.002992142404105629     0.45751399428163425      -0.05918650113633161     1.497685230064017
0.9895110567473179        0.0028380229459666196    0.471341648616836        -0.06681112398081741     1.4634157289028853
0.9897836578828912        0.002752206807532571     0.4677605546452465       -0.06663556836907976     1.4711602948071982
0.9899770211287967        0.00292559013868259      0.46636415411252746      -0.06372167455630272     1.474293249974542
0.9903876644389354        0.002971242809166353     0.4617147436096421       -0.06122117503830197     1.4868753399386005
0.9901766331719494        0.003078379166739599     0.46488291550787014      -0.060972907084402       1.4782888028464731
0.9905682934844356        0.003091176616129768     0.4602826126518765       -0.05885906464393648     1.4912403405222543
0.9914268349936526        0.0024497521189442593    0.445052654349206        -0.06280308713053173     1.5374742209617305
0.9913148301336664        0.0026494605550365143    0.4478295017635682       -0.06064420483095739     1.5293464265429912
0.991194351289952         0.002830495630960713     0.4506348429197537       -0.05887238669532414     1.5210286557098913
0.9910743732121836        0.0029856490974340157    0.45326585938218106      -0.05750792961818845     1.513613357929535
0.9818349041954028        0.0040653893962657554    0.5442592158447915       -0.0840330893439839      1.2566900675812078
0.9820476047095873        0.004252132730587499     0.5433223559373208       -0.08215068759286982     1.2607658635432415
0.9822679820129236        0.004417462825989596     0.5422923475961948       -0.08037428280212273     1.2646408616767122
0.9824903603412553        0.004558144005259967     0.5411856849322955       -0.07874361171227927     1.2682078005401023
0.9827027448502612        0.004664018262366538     0.5400411767461629       -0.0773709930973297      1.271424283109738
0.9842568962375086        0.003736772587229162     0.5249410712389607       -0.07984188961526607     1.2992471539556598
0.9840992047318483        0.004005794470812607     0.5271221930429083       -0.07816874261347828     1.2959686457705153
0.9829260730270339        0.0047375800031102516    0.5387033454123619       -0.07617904746235499     1.2749249056008667
0.983146225308814         0.004787749501555437     0.5372931354797977       -0.0751456785590001      1.2785665777648314
0.9839273413936817        0.004253121496475933     0.5293650261901228       -0.07676060207144263     1.2924499923079147
0.9837441100015998        0.004476620412864427     0.5316201210512902       -0.07561448254453694     1.288912559221451
0.9835555417765655        0.004682657619742926     0.5338506090276262       -0.07465214636235845     1.2853065823595073
0.9833685618994404        0.004865092218381399     0.5359722491622617       -0.07388794834193561     1.2818290477493228
0.9892100249444219        0.002933305983919801     0.47516059537683913      -0.06702476719437638     1.4553018848980048
0.9909036877451276        0.0031223414829510917    0.45638995351555506      -0.05671123952472135     1.504696972235511
0.9907300641332238        0.0031784990457498774    0.45891810796566296      -0.056952234414109106    1.4944256367892068
0.9910868916155707        0.0032279543635058204    0.45490923464189653      -0.054391924855080175    1.5074908749264144
0.9894435703946408        0.0031437586730335937    0.4736054126281399       -0.06367755693729309     1.4562748725540187
0.9897237008671279        0.0030289756941791085    0.4698616338075867       -0.06368450273157568     1.4655482345036646
0.9899434946121753        0.0031973146905572795    0.46830006370510313      -0.06072574667769285     1.4689180976136063
0.9903796670710285        0.003208550417757573     0.46330964750424325      -0.05842496169823754     1.4830470943954317
0.9901679572558146        0.003341235636148212     0.46664097236845364      -0.05796661329167518     1.4733676743658226
0.9905898748345141        0.003323481285456075     0.4616215050060472       -0.055972353316698316    1.4883600641829438
0.9916781528433181        0.0024503818809328446    0.44152345043301305      -0.06149004282171131     1.5497790463277
0.9915519466978047        0.0026673475139432365    0.44471880524342705      -0.05913523266596663     1.5400681409955534
0.9914165007110691        0.0028725935824966647    0.44800045709915176      -0.05710726986033233     1.5296729133239853
0.9912676825670746        0.0030548857446917486    0.4512978309855575       -0.05555671415597629     1.5199929791417235
0.9815376926271538        0.004161005967560811     0.5466409530261188       -0.08411484681497501     1.250635965354306
0.9817711999795123        0.0043653901388730956    0.5456464214807887       -0.08207797626300413     1.2557652315171064
0.9820151458678107        0.004546849588275595     0.5445346584645804       -0.08014510990100347     1.2603635724829483
0.9827730905219275        0.004914521547607644     0.5404950332457522       -0.07536151965979437     1.2724262811155673
0.9822652414130655        0.004701306233678277     0.5433098176258043       -0.07835791576129368     1.2646218536123692
0.982523334878825         0.004831474310177743     0.5419572264436563       -0.07669201808375607     1.2683702236632912
0.9846079269167799        0.0037383796506756484    0.5220881921450595       -0.07876538539702425     1.3049418634552554
0.9844343345827927        0.004036832199547362     0.5245632344710868       -0.07688149847166119     1.3013490768704516
0.9842429944759004        0.004310001789560927     0.5271187515546473       -0.07532145389973037     1.2973609998116273
0.9830097918355709        0.004992161689008737     0.5390996518163421       -0.07408141956813043     1.2756914543436555
0.983204930687148         0.005011102236130732     0.5377693701857627       -0.07333672898398684     1.2789127843386559
0.9828661862269483        0.005122449646928157     0.5406645619933264       -0.07359167143953221     1.272950922364908
0.984038754995098         0.004558198826521378     0.5296899811527079       -0.07405284798450494     1.2933293095718843
0.9838256847741769        0.004780922719692126     0.5322248799857449       -0.07305107805890411     1.2892244790718113
0.9836070716083631        0.004974109027893478     0.5346686870049719       -0.07232182682133755     1.2851393876837898
0.983388304682965         0.005136423771689174     0.5369673722708098       -0.07184085927551141     1.2806887971790932
0.9888760797644103        0.0030420867083457634    0.4792233289472612       -0.06727238438087081     1.449817747794462
0.9891335700526722        0.003269698989579581     0.47757730955651523      -0.06374584075662033     1.446895613593134
0.9908506926104228        0.0033674800384811444    0.45885410007605365      -0.05401879899569446     1.4962227302414466
0.9913272379973611        0.003346481162310189     0.4528884283653377       -0.05153913293913114     1.516427086945053
0.9910978103781676        0.003491766256319768     0.45690237303868125      -0.051121448497759285    1.5045971568887635
0.9893981758388707        0.003475365602908353     0.4759146479927447       -0.060328062815761065    1.4481405191270715
0.989685306166168         0.003329249953642334     0.47197460052636403      -0.0604994768583692      1.4589133355857975
0.9899324640145846        0.003487367555995929     0.47024218796515477      -0.0575300044630578      1.462881312303548
0.9903993425314845        0.003468617670941852     0.4648784005720608       -0.05530481206685967     1.4785118291751609
0.9901825726402738        0.0036251523040696514    0.46844019677032706      -0.05470759603835162     1.4680695779259543
0.9906430195722348        0.003572339316527314     0.4628739600070109       -0.05278321989321628     1.484971964405309
0.9919567183539071        0.0024518873180210407    0.43752686853806894      -0.05996205002186882     1.5643363015339966
0.9918170121899217        0.0026914681890355947    0.441215157320706        -0.0573258204823049      1.5529435455162284
0.9916657283052426        0.002912786345743628     0.44497619370531366      -0.05515835340507893     1.5413545423447255
0.991505814880045         0.003125837226213368     0.4487966484934827       -0.053280759604189994    1.5297069504079144
0.9812100478445367        0.004268254321463101     0.5492577351105331       -0.08418467421087562     1.2439990196249007
0.9814664728482098        0.004492227165068085     0.5482034596379525       -0.08198014308703556     1.2504839528134575
0.9817336449754168        0.004690634664430205     0.5470197086490259       -0.07989247903141584     1.2558511400312626
0.9820103863991742        0.004862465536177499     0.5457019234437112       -0.0779332041458512      1.2605995906662395
0.9826107404674179        0.005139598319406892     0.5425469067672642       -0.0742465298377654      1.2694612863710393
0.9828299607422503        0.005303751463951314     0.5416804019570359       -0.07241563579264998     1.2732994336935886
0.9822991730257574        0.005011852245430447     0.5442389258792321       -0.07606573682471206     1.2651596500646367
0.9849954038044513        0.0037350317666490634    0.5188574239507772       -0.07757750285327257     1.311114697105012
0.9848085736626001        0.00407099619237511      0.5216583075885851       -0.07539885205446319     1.3075016204844443
0.9845960167177202        0.004375468463397437     0.5245888502563095       -0.0736464018186529      1.3027829843025085
0.9843674626446183        0.004649550636849954     0.5275310214418821       -0.07226032450133046     1.2983017576255012
0.9826347381968621        0.0054570667481036225    0.5437035913701654       -0.07194348702516579     1.2696892815873986
0.9831075953208758        0.005262320881002721     0.5395283432624787       -0.07183681539045668     1.277196655796072
0.9829305434991475        0.005537321724315173     0.5419899666840787       -0.07045523234243785     1.2737862379147422
0.9841288275404815        0.004894895379992444     0.5304229389842722       -0.07118476192005341     1.2937429377923453
0.9838821904860432        0.005108513012781041     0.5332207282787066       -0.07041663329577619     1.288967193383259
0.9836317276761534        0.0052853473156917906    0.5358547336397391       -0.06996022680962083     1.2851176514581424
0.9833949002087803        0.005388120019809746     0.5380319590026247       -0.07000483658814834     1.2803588429544528
0.9885071454415018        0.003157092789660407     0.4833442878306919       -0.06783875875904664     1.4362152650770879
0.9887846506440219        0.0034103971196972737    0.48180356690793397      -0.06399623833225125     1.4326794831770215
0.9890767720834339        0.0036354467113053793    0.4801232850544002       -0.060296964997763665    1.4344880760417598
0.990894704827911         0.003665878834606982     0.46074056297341764      -0.05026995462174182     1.4923399969748692
0.9915910100001174        0.0033879437729155554    0.44996718735696817      -0.049436844644012795    1.527271677125059
0.9914545482999295        0.003549709052941196     0.4531270205628372       -0.048283944364252374    1.5200153383763308
0.9912871972213105        0.003589080073495772     0.4554913077646484       -0.048834943415487796    1.5068155435315833
0.991140164959813         0.003753898585749304     0.45869435540397757      -0.047807158800062394    1.4991524816097197
0.9893781785784471        0.0038325780357988623    0.4783241158213261       -0.05676625410751792     1.4387446836563569
0.9896712617711928        0.0036509875368385034    0.4741264505561494       -0.057107943848878955    1.451692689409372
0.9899463602123549        0.00379517180853316      0.472216882269665        -0.054138548467932195    1.456583807036471
0.9904344775847127        0.003747084351108479     0.4665856846554752       -0.051988883716416294    1.474135448723359
0.9902144499710909        0.003913868681889084     0.47027689827422064      -0.05141529428828983     1.4628076390784608
0.9906890250443645        0.003861493718569346     0.46471802369225385      -0.04926926196206532     1.4801104310618436
0.992264753528413         0.0024538662533227923    0.4329941515241476       -0.058185120856676285    1.5813705810531282
0.9921099594654447        0.002717388918368946     0.4372698142735198       -0.05524536552184526     1.5677561180924935
0.9919430666142576        0.0029612853832735667    0.44161265133375         -0.052848550404719315    1.5539607890737492
0.9917676673939305        0.0031855608101917557    0.4458996097082677       -0.05093039082468826     1.54061327484156
0.9808485848918093        0.004387542215667467     0.5521542615447991       -0.08423592363312071     1.2348984146586497
0.9811305265286872        0.004631088540613757     0.5510215611927182       -0.08185797075268543     1.2446233070253125
0.9814211674697824        0.004847632436734842     0.5497643976334142       -0.07961792238886689     1.251372752728584
0.9817273608236197        0.0050413004155409145    0.5483504324794365       -0.07746087748557723     1.2566777355025425
0.9820393631614324        0.0052024159651836025    0.5468034353436045       -0.07547525346666274     1.2613264734326952
0.9823497063218721        0.005336550251691438     0.54518484554111         -0.07364302515805755     1.2660561792331917
0.9824172034993208        0.00565760926098987      0.5460796897659556       -0.07122127298007992     1.2666493104628895
0.9804490444387592        0.0045181463118683035    0.5554713631031422       -0.08412091326466888     1.2316190346736404
0.9854157400936463        0.00371444863197127      0.5152074217109078       -0.0763838074316112      1.3178705641060606
0.9858646051669302        0.0036737789060815196    0.5111305643121392       -0.07521944936780617     1.3255647138585747
0.9863215672503596        0.0036203582616472917    0.5067979067074567       -0.07408005740962485     1.333136449532807
0.9867760785679566        0.0035526298512744865    0.5022691889893894       -0.07300473398868523     1.340891913960428
0.9872286336531655        0.003470370864780621     0.49750378177701         -0.07197180477043609     1.347913307428879
0.9876726184335965        0.0033748652476128893    0.4925134738597438       -0.0708024724030961      1.3596984673852477
0.9881013613617123        0.00326885657585424      0.48760494086887957      -0.0692008151984241      1.397061868735744
0.9852281666610955        0.004102643239613078     0.5183122242894846       -0.07372379378213934     1.3139495008639457
0.9849937910909827        0.004450163867493224     0.5217108278739824       -0.07168311887179725     1.3089982618158025
0.9847330412816743        0.00475087436557067      0.5251208660441159       -0.07020388068441717     1.303667201113152
0.9844685504194275        0.005023789999950283     0.528420143955575        -0.06902804918098672     1.2989779471697114
0.9827359168866167        0.00579043919425509      0.544474712554564        -0.0693167423784773      1.269936175253766
0.9824812869185824        0.005918791516480271     0.5467955481028649       -0.06923954719786996     1.267637688120259
0.9832375945005793        0.005607689142252702     0.5401431240073932       -0.06896714375319886     1.2786538211058627
0.9830307545246086        0.005799932161051612     0.5424866265760313       -0.06830063862988896     1.273741350432519
0.9841928082957839        0.00526118638439363      0.5316174981338025       -0.0682117771537376      1.2932157381780491
0.9839082691650809        0.005457855991878185     0.5346466567801508       -0.06776128738251162     1.288156663899925
0.9836096959432272        0.005647430398527004     0.5377016986980613       -0.06742878734055112     1.2828509782716175
0.9826674959960988        0.006066904121798507     0.5462119562243193       -0.0676525209131986      1.2688825065004115
0.9883975468704539        0.003551407523580416     0.4862186868570642       -0.0647309203657095      1.4080022265966685
0.9887105156412342        0.003808585905521872     0.48469015093752327      -0.06055234260663233     1.4160146448154507
0.9890439593172513        0.004032905330128745     0.48291506056581573      -0.056593825760148465    1.4227036023543371
0.9909469174224856        0.003951179892056602     0.46267373589432575      -0.046750869229741504    1.4858308692279072
0.9918494081744417        0.0034751202031575276    0.44754926255064104      -0.04670435831777656     1.5361869240353971
0.9916417000985578        0.003647563258091957     0.4517973901345664       -0.04592206160580219     1.522830055668791
0.991416224471281         0.003803545310158407     0.45598405648755025      -0.04552059143407361     1.5092256547331286
0.9911949700884635        0.004026165318303326     0.46066130062312954      -0.04440406507896732     1.4944852837629783
0.9893913517455043        0.004215677614924759     0.480859112910669        -0.05293403351580473     1.4303819573353513
0.9896868508653113        0.003991146043030715     0.47631299734284277      -0.05352071529757826     1.4445779306581787
0.9899901450977532        0.004107411202730459     0.47412699645773343      -0.05066401328488184     1.4509291194577123
0.9904784709154004        0.004041205637336575     0.46851841126083915      -0.04856179244888395     1.4702980785159256
0.9902516790792213        0.004176850866763289     0.47203601207979295      -0.04846602622078331     1.4573988063991914
0.9907402675482366        0.004163092368175264     0.46684413241162587      -0.0457165517669626      1.4734122201142383
0.9926056970662187        0.0024587567614977267    0.4278499822736547       -0.05606663949794568     1.6014927419739202
0.9924337277038057        0.0027475006720233223    0.43283817736285607      -0.05280658757706611     1.5849854827532022
0.9922481335253707        0.0030146718463097623    0.4378875243842298       -0.05019358266465456     1.5682391137993343
0.9920521662111792        0.0032588550278941576    0.44284364072339116      -0.04816628920136563     1.551848616869879
0.9807595499404089        0.004788769160794112     0.5541886040523344       -0.0815947926438131      1.242007925794758
0.9810798995146485        0.0050268070233673995    0.5527950721702143       -0.07921410243480098     1.2484979744001412
0.9814117080477           0.005237230919860797     0.5512818112841726       -0.07693920319712864     1.2535966955130222
0.98175698411816          0.005415829360213339     0.5496037809269039       -0.07479025758048341     1.2580174595478981
0.9820989571719508        0.0055519246266861055    0.547812810793398        -0.0728885900245227      1.2622111686715767
0.9822026155000417        0.005890883228722692     0.5485594754820357       -0.07027566487511404     1.2637601661550422
0.9823969464113826        0.006158203158162057     0.5484515061824844       -0.06789000012039718     1.2643584283202447
0.9800076186480954        0.004658958724664357     0.5591257208595134       -0.08351869123200574     1.2493404896562081
0.9803471533786848        0.004960143802072089     0.5576824316989181       -0.08110160784144249     1.2475372093169528
0.9989573130172363        0.0014543603214952326    0.25143780825853995      3.904975374725473E-4     3.8623905770609936
0.999223668972787         0.001379421967766219     0.23462334363086665      0.00494950693204818      4.425782806528955
0.9991613786471311        0.0016424255390580852    0.2628544210010515       0.009948474405291766     3.6964053168672604
0.9994109401070923        0.0015537944958637336    0.2507617785863896       0.011894721214445266     4.074681388426065
0.9993764266926944        0.0018115829214990298    0.2789012842854068       0.011622012303492066     3.344590059526126
0.999607513574154         0.0017093750355066017    0.27031950201754923      0.008415982658856574     3.45690651929178
0.9856853310669056        0.004096530082553164     0.5144177727829015       -0.07216302553588251     1.3221479259627407
0.9861525919115566        0.004048541228501179     0.5101307015312776       -0.0708451096789229      1.3302994457715311
0.9866169104374275        0.003986792038546621     0.5056579536303457       -0.06957013678446894     1.3393013531789324
0.9870790112339526        0.003905873248596837     0.5009418918950069       -0.0683598642196842      1.3490166040858418
0.9875354347984876        0.0038048396874130635    0.49599177763988783      -0.06715650256933776     1.362588362108205
0.9879781339915369        0.0036851419755318665    0.4909791616768537       -0.0658805467808123      1.3856736402209175
0.9854721252428826        0.004554490981783038     0.518265229270491        -0.06909262496671677     1.3169769624140277
0.9851263544195091        0.004852452719398105     0.5224855137922145       -0.06796318098787228     1.3100337276743252
0.9854670445701504        0.004978454015327817     0.5203908052175886       -0.06566346034425327     1.3148554876350609
0.9848475895921278        0.005161967065873467     0.5261759660692222       -0.06658766450934896     1.3049050477314106
0.9845433455459739        0.005434301578745385     0.5298566540485566       -0.06565754844647159     1.2980674229434692
0.9829608633593405        0.006077284302721324     0.5442742177717169       -0.06662579012558088     1.2726709008434673
0.983287941867832         0.005984320689006702     0.5415886165957858       -0.06616795779021523     1.2774065053685721
0.9842266971184159        0.0056537820135717206    0.5332996823811981       -0.0652045031444539      1.2924661335534957
0.9839193666265955        0.005862704565192557     0.536567010007409        -0.06481601690966902     1.2870130903735202
0.9836257558819348        0.006082968093381316     0.5397441180165692       -0.06431944257501977     1.281188734265011
0.982711688080138         0.006372859945070281     0.5473741816092642       -0.06546131740978077     1.268956531173535
0.9883034888557156        0.003977528714862046     0.4895631941294752       -0.061223382376980585    1.3965130951752973
0.9886555842928099        0.00424516024167769      0.4879985107241989       -0.05674719232581026     1.4051742244298262
0.9890472571591278        0.004467633602162062     0.48596652713405536      -0.05248965894854892     1.4132493835015882
0.9910114217796631        0.004234544408815112     0.4646768161349097       -0.043307333953019       1.4822649145649036
0.9912311147484791        0.004271759006740707     0.46274078977165106      -0.041529294917202954    1.4903417515877566
0.9921392839380806        0.003585145711299989     0.44505052861318345      -0.0433966269122045      1.5470063576173254
0.9919052140202592        0.0037922671853256483    0.4501333702024631       -0.04245951467132183     1.5307161187221496
0.9916663286837144        0.003974339613860742     0.45485475647091883      -0.041940744497698614    1.5154398641594764
0.9914306968764534        0.004140059714457662     0.4592221528967773       -0.04164919812484289     1.5013022001673482
0.9894482577950372        0.004623831682759915     0.4835020516422543       -0.04877500225873474     1.4235090633405363
0.9897432184500796        0.004348551741175753     0.47848872657430963      -0.04967996931538652     1.4389287064494722
0.9900976858676009        0.004420782610926049     0.47565068118140424      -0.0469322946243917      1.4482373488984421
0.9904776435442613        0.004400986200934279     0.4717229718593169       -0.0448633525604682      1.4597504938368397
0.9908363905293737        0.004490041125941186     0.4690044820010288       -0.041785231380232685    1.4703582048512376
0.9929826493227245        0.0024648666868993187    0.4219818515089903       -0.053560149137771594    1.625558514415786
0.9927919623783216        0.0027825087045287417    0.42785439243611695      -0.049926086068657984    1.60533387210981
0.9925855271221448        0.003075751595982295     0.43377100142841324      -0.04708485576690214     1.584977541910017
0.9923668941024482        0.0033442894982468265    0.4395528597183718       -0.044930612919428285    1.5653164512588498
0.9998254037801965        0.0016212938481202862    0.2638029972231429       -8.601927977001224E-4    3.3352773497338637
0.9997996527594755        0.001839760804403024     0.286856232068923        -0.0025812701662560086   2.765879965779621
0.9999502538417573        0.0017657828393333134    0.2810439923114687       -0.012364945241429021    2.513791022290103
0.9999946107313844        0.0016544585455424247    0.2693123250881077       -0.015679055439981607    2.5581411118143236
0.9999666175646589        0.001510062821886342     0.2517950636710023       -0.01185671592768394     2.998020711529375
1.0000895108044134        0.001594503516272534     0.26219162744875185      -0.02537807356832355     2.134834180391764
1.0001040658881049        0.0014311299038578234    0.24089287301587964      -0.028763215041347042    2.162860361975991
1.0002208609588603        0.0015933508321607313    0.2603369677011617       -0.03928824157385757     1.529080493729574
1.0002720242375183        0.0014240640098006681    0.2349683611467355       -0.049938320519903434    1.0731758958121722
0.9996357310233438        0.0014748429577836949    0.24112327424575888      0.010795886479802607     4.38929113917792
0.9994652017417719        0.0013143620021594735    0.21903673860301318      0.009401202149845349     5.104888385502824
0.9806997454409757        0.005223986704286222     0.5561365503242371       -0.07867234559938552     1.2489386678439978
0.9810628733131596        0.0054567912741026936    0.5545022083834272       -0.07629399092391886     1.2519392236040467
0.981440888085845         0.005657975190363687     0.5527217763335099       -0.07399264866012374     1.255637480921691
0.9818323330124473        0.005811669101894178     0.5507126134759655       -0.07188699643813513     1.2593936919840125
0.9819905312465386        0.006248115215448975     0.5515513588733266       -0.06852644490437153     1.2608239803893773
0.9823372289402086        0.0064557100564201966    0.5502377781012627       -0.06610981527720526     1.2644019316578738
0.9795299380632917        0.004810061231137906     0.5624689844740751       -0.08287265437673107     1.2632888422812305
0.9799013943741097        0.005143692540764629     0.5611806490694365       -0.08046681440319942     1.250064539150536
0.9802827201412692        0.005437489403942582     0.5596430177578458       -0.07801266149373189     1.2490563070996485
0.9999902506028981        0.001931637493623651     0.29707335924118367      -0.01619908132403877     2.1134844492044995
0.9995988276345081        0.001959079333176726     0.29536291632283534      0.005261058484600394     2.8589715201294266
0.9998358117014601        0.002088181915810896     0.3093579145510211       -0.007264106427861259    2.319209604624658
0.9986639921272721        0.0015394099373498811    0.26840507083010495      -0.003753907591473701    3.413557440550893
0.9988872102510485        0.0017455292141642972    0.276714707311077        0.00699240242569366      3.3383447318726307
0.9991208545912644        0.001927184746061505     0.28935672778355315      0.011778562176395231     3.136288144863519
0.9993634941258827        0.002086688029316101     0.30393260688373136      0.009746306230482567     2.8208595036913517
0.9983407379219656        0.0016341293409227718    0.2850845514193117       -0.007485245864132535    3.05856716699758
0.9859791312886937        0.004486321977105162     0.5136869226085524       -0.06771399565777392     1.325802398508088
0.9864543292157002        0.00443283806313891      0.5093036910142598       -0.0662340529425698      1.3356131728338043
0.9869283798376985        0.0043588572025026       0.504674707604653        -0.06481661818150543     1.3462884517064106
0.9874006882539276        0.004258289869926586     0.4997565571025145       -0.06348276910878418     1.3594527629126303
0.9878628599227608        0.00413025261823343      0.4946510184932024       -0.06224751202043676     1.3771287174530533
0.9858250576028429        0.0049148709709907175    0.5171584074234578       -0.06475007145366825     1.3227188652255315
0.9852540528343021        0.005259509599211288     0.5235395028458506       -0.06427847389647358     1.3105474204412964
0.9856672729813512        0.005327561357947593     0.520683587320466        -0.0620866778158825      1.3171092598863965
0.9849608913011706        0.005654924567297166     0.5279028101702271       -0.06242026221893244     1.3037617462613653
0.9845641963350555        0.005854173468322263     0.5319046782878044       -0.06249008801389091     1.2972893232683207
0.9831264765116556        0.006353372857901815     0.544516524243162        -0.06421196939271963     1.2737931294591116
0.9834158871400771        0.006295882162410676     0.5422741939428658       -0.06359795994802443     1.2786691469276092
0.9842351753737502        0.006069921762227767     0.5354216948968996       -0.062194611493137326    1.2908010301404904
0.9839110426983689        0.006264728598332123     0.5387275532432535       -0.062038575968556796    1.2847356392395308
0.9836335369178588        0.006405539531961624     0.5413762488809506       -0.062081319576702834    1.2794248187972124
0.9825240210166132        0.00677464655913007      0.5505780675429771       -0.06345070592833947     1.2648600095560052
0.9829686441086123        0.006723743853281499     0.5474498494979977       -0.06230494300511396     1.2713995037770764
0.9882172430912409        0.004444025603774743     0.49337662635731894      -0.057376257096188855    1.3868239007697711
0.9886128625460419        0.00473943301867465      0.4919305020772446       -0.05249735503032927     1.395123528682612
0.989081781849702         0.004936624851256362     0.4893674016527862       -0.048080363964768474    1.4049904264513513
0.991134402095565         0.004504756363432708     0.4661678056172695       -0.0397490804512193      1.480089022044911
0.9914065117703306        0.004447255447407456     0.46278548884781173      -0.03855724173696095     1.4913928373922083
0.9924621212709389        0.0037083656018265187    0.44242042226263806      -0.03958758589627029     1.558814334287855
0.9922009136626447        0.0039446266445852625    0.4483594257153118       -0.03861500855778927     1.5389324455596656
0.9919352607434454        0.0041476291878820475    0.4537574810064469       -0.038166745846096535    1.5208251251009244
0.9916689726847115        0.004317829779511057     0.45859758938714307      -0.03814840265805796     1.5049429434972657
0.9895426500404026        0.005061830991051472     0.48642500587697485      -0.04431132662995647     1.4179324765663432
0.9898447152259534        0.004733682982491193     0.480794231094595        -0.045456676447320654    1.4331783631465882
0.9902484925216184        0.004781179845593505     0.47750185431567943      -0.042592817217465384    1.4427126598889715
0.9906452431315711        0.0048135348107396095    0.47411307085183835      -0.039849102522139086    1.455411368743202
0.9910082739715186        0.004820819529081905     0.47078147305243684      -0.037480233546470315    1.4662480001549614
0.9934002112179926        0.0024724373268581756    0.4152489253624258       -0.05055689750885122     1.6542695577709028
0.9931890336560771        0.0028231962209399647    0.4222404474349463       -0.046489008817984234    1.6294600220311306
0.992959445893307         0.003145522750975852     0.42923181330711285      -0.043418259466743804    1.6045400853046827
0.9927159417684016        0.0034408453831308995    0.43600787120840284      -0.041162117455425806    1.580655411618528
0.9979837082703089        0.001738616310762119     0.30135525744402347      -0.010901602406413911    2.772233897131685
0.9975881330515458        0.0018585060190065544    0.31737986110356003      -0.013965918069591436    2.540594338030193
1.0003931561736221        0.001580706359656188     0.2535691341823234       -0.056279257915437864    0.7310720945792218
1.0001413513348325        0.0017817635049771805    0.28278063461913133      -0.0289113323525233      1.7677720456659427
1.0003290908528546        0.0017341925790471647    0.27420883286329367      -0.04619124546763815     1.184774146526968
1.0004424827814997        0.0014053217066482288    0.2247234814888761       -0.06714497208712224     0.06985774242659876
0.9998242558920577        0.0013974325648970615    0.23307855388854606      0.00344032722733632      4.406694131397739
0.9999644995154273        0.0013669141848966248    0.23140390568415153      -0.010258095334543844    3.6923011539680646
1.00003655019396          0.0012790091059485865    0.21651069698958883      -0.020794297691229646    2.923219071861306
1.0001623219948026        0.001273612739041052     0.21288948938896968      -0.041251640958554       1.6737466900309521
1.0003097747418963        0.0012595203605183481    0.2027357342435516       -0.061690107927543       0.15362983390708693
0.9996829995007563        0.0012571370691698773    0.20666182626002158      0.011656083395140992     5.854193261915932
1.0003352138515853        0.0011131475681429015    0.16489421817044903      -0.07161523926717363     -1.2218334268737543
1.0004715788306147        0.0012289587910070733    0.18864003804134688      -0.07628338144599482     -0.9402181331997711
0.9806722024012154        0.005695056966062211     0.5579848541893595       -0.07557565327486808     1.2504775996974917
0.9810801152164962        0.00592556813125185      0.5561776251399051       -0.07312699502928048     1.2530283927200847
0.9815098352408865        0.0061099159920901544    0.5541096537340254       -0.07080513833593266     1.2566012066672778
0.9815947286724095        0.006587863842498629     0.5556222295266339       -0.06748193909078913     1.256780536824998
0.9820627595307997        0.006724680482749601     0.5532728372702991       -0.06522974890693924     1.2602914827078397
0.9790137192628162        0.00497364312920426      0.5659041711603777       -0.08273844997685585     1.2572368071264803
0.9802491702667768        0.005943818269173538     0.5615722788792586       -0.07485609977668296     1.2487943098811238
0.9794172793862925        0.005338588753824493     0.5646678269402665       -0.07995548215217642     1.2528606659668597
0.979830862747758         0.005659542234349744     0.5631996856993108       -0.07738379649469589     1.248678879121396
1.0001767675829367        0.0020355521450693297    0.3054977365409166       -0.02964886206439429     1.6281859748076666
1.000034617096642         0.0021039115393522573    0.31141251661891733      -0.019600135899009358    1.9140928958584955
0.9999807647628632        0.002238512206439168     0.32154823893785106      -0.016503280545025818    1.9171520650617127
0.9996113215905317        0.0022224862681228634    0.31748854544760596      0.001590007606637233     2.425516950382597
0.9998353937492928        0.0023233865918694968    0.3268746949704186       -0.009088096820309954    2.0854470432471977
0.9985849380199191        0.0018602888675109876    0.291214321070636        0.003766243317159501     3.027798254690195
0.9988397828859686        0.0020583225719614366    0.30127154653335414      0.010407118979518475     2.911525035234318
0.9991032373331333        0.0022299047487487947    0.3136437987968494       0.011458638238741048     2.709170601897561
0.9993737431650386        0.002376676762251673     0.32629706695562893      0.006846531659840143     2.4307558185868383
0.9982524104162384        0.0019899059605862574    0.30604443398096426      6.224973810092374E-4     2.7644394031015023
0.9862862304405732        0.004885999329853448     0.5131800301685604       -0.06305896747656892     1.3309766343417373
0.9867699231961078        0.004829426332816481     0.5087431687217002       -0.061379603490103296    1.3413120936116008
0.9872614431237842        0.004737653394493152     0.5038948041990917       -0.05982160371454567     1.3539001668920407
0.9877475661298168        0.004609504953776632     0.49873661998388313      -0.05845050650273612     1.3693400411905499
0.9861086813973251        0.005335014974634628     0.5172224815796139       -0.060149569895676304    1.3256661279607564
0.9848537152874413        0.006068076104199556     0.5310186796769302       -0.05982548284154434     1.2993095569946502
0.9854417030007018        0.0057161041154639184    0.5246437041429859       -0.060029140786213415    1.3105362228096071
0.985897963572672         0.005771302778180991     0.521517135943884        -0.057665066726997054    1.318446190343684
0.9852217735218787        0.006091163300026877     0.528495958159644        -0.05816053591464344     1.305691472031764
0.984569099608755         0.006278147295080647     0.5342425327928907       -0.05945806103575497     1.2937673241449463
0.9834056781743422        0.006652351307582822     0.5442059324228278       -0.061253273162754814    1.2764859067482315
0.9832191613693724        0.007002383548226814     0.547320124063887        -0.0596439739475428      1.2715382581472574
0.9842206965086572        0.006506218686804213     0.5379524348775292       -0.05923180972859581     1.2880606891399662
0.983831979724777         0.00666060558803796      0.5414405226761586       -0.05965377201890909     1.2813279712770418
0.9822389308865057        0.007184099921069483     0.5544160009996738       -0.0618071232255143      1.26087764918947
0.9828247076688714        0.007186678149788034     0.550798170027701        -0.05984346557667824     1.266167195329423
0.983252681702478         0.00732417629600781      0.5488906912320212       -0.05749586312711075     1.271954564340135
0.9881220292172284        0.00496161782848602      0.49789027840030115      -0.05330434414006777     1.3764244288071084
0.9892100923688288        0.005400202504371342     0.49229870994367264      -0.04340581270224875     1.3997051060564916
0.9886380153963094        0.005322729052221464     0.49634526652718375      -0.047336353730089605    1.3851638944694338
0.9913345959246866        0.004775377157877367     0.46717512640170517      -0.035779984640324246    1.4787850352943177
0.9916388188497064        0.004673987666130846     0.4630446216662613       -0.034713434093354666    1.4931329933748996
0.9928208940862202        0.0038445307626506935    0.439707004336159        -0.035229652069864954    1.5721057938336747
0.9925303599807012        0.004108983683334642     0.44659016937704993      -0.03431672144187848     1.5481723627934738
0.9922340592536556        0.004337071833191643     0.4527937717352773       -0.03397596216321113     1.5267647608895023
0.991936135943492         0.004524767996253649     0.4582592465925952       -0.034141303379360693    1.508382988135746
0.9896690172453644        0.005512764203152139     0.48958277539489464      -0.039760015146748436    1.4098901642935309
0.9893763096217596        0.005768939050178025     0.4944008605641816       -0.039463463298849       1.3947966177827928
0.9899879825101067        0.005165942069230271     0.4835255713926188       -0.040735183115681646    1.4271556301190602
0.9904462640099572        0.005207442566093938     0.4799907666149897       -0.037544739766661284    1.438948423316777
0.9908605167037315        0.00519337794839293      0.47622550051546547      -0.035042976735515964    1.4512343954921925
0.9912384914596449        0.005147822558840557     0.47237651029090294      -0.03298705782431303     1.46405917409059
0.9938633650755797        0.0024807019527521407    0.4074599039843259       -0.04688687101405294     1.6905881782464312
0.993630113377059         0.0028700729791595256    0.4159077182504726       -0.042332147732082555    1.6591685800347762
0.9933744981635021        0.003225418693633216     0.42425995574759306      -0.039054784565149596    1.6279389133213062
0.993103111507245         0.0035493560235153178    0.4322401076093519       -0.03676675456695588     1.5981740524431187
0.9971498867508306        0.0019905028469974656    0.3329318548114874       -0.016938610863107665    2.350284803765163
0.9978850062589436        0.0021359197664510307    0.3209769949688304       -0.0023903824751955282   2.541831328150979
0.9974773181112181        0.00229910593057611      0.3358312929316684       -0.00534215035969219     2.354750591081769
1.0005852041712044        0.0015652793102753186    0.24465266242444608      -0.07074454184731727     0.08094090118823412
1.0005095455838688        0.0017616123582459657    0.27264817612829434      -0.059439714332600424    0.6595196238595711
1.0003806167449485        0.001953413594050393     0.2957373167763299       -0.04583592671994942     1.1495886694439086
1.0006294613942024        0.0013647085271340158    0.21069960250003625      -0.0794997670529984      -0.7006974051612187
0.9998914017787648        0.001217735471829578     0.2024556825223776       0.003465666055432839     5.775048484786568
1.000051141613184         0.001154996872670072     0.19243620051019703      -0.024405145698814693    3.2729107726349924
1.0001842789036104        0.0011341822862754145    0.1792099924425801       -0.052429332721495324    0.44294989513727406
1.000227145035351         0.0010232046290810913    0.14108566008565385      -0.06531850823784921     -1.3950024279122384
1.000336404079605         9.685525170733492E-4     0.11783830658332838      -0.0749490431544426      -3.5984844930404374
1.0004821015184353        0.0010644668249021351    0.14771266166122612      -0.0804852787284628      -2.3761302277702856
1.0006467160091592        0.0011724962192937404    0.17240551510913316      -0.08379303855209118     -1.6585864399410128
1.0004928395823058        9.084785686442522E-4     0.1061978559268348       -0.07690957555293071     -3.712229466898819
0.9806746673089575        0.0062093874133014385    0.559877709885705        -0.0722691882663241      1.2507071797307747
0.9811244296399365        0.006432143812270211     0.557934657518925        -0.06975570327250259     1.2533429053528866
0.9811971979371283        0.006949118174424909     0.5596808265134654       -0.0663563608712829      1.252841192670324
0.9816912332425093        0.007098028741920038     0.5573534156458665       -0.06402368592486461     1.2556222424555223
0.9784523021050354        0.005153212579288518     0.5696347682478128       -0.0828323888858238      1.2483092068178687
0.9788915956479479        0.005549547640055431     0.5683099770395027       -0.07969848166835182     1.2483291352798156
0.9802459371631187        0.006467393672823767     0.5634997118283828       -0.0716629089700795      1.2469963100536405
0.9797936095409381        0.006196057004737263     0.5652120651930287       -0.07424173170227776     1.2460225717984963
0.979341002777161         0.005897607433655954     0.5668488638643557       -0.07685889140069833     1.2469415043485759
1.0003346782483669        0.0021714048185375355    0.31485656636026066      -0.03917912548363133     1.2770908868224715
1.0001705910205558        0.0022676520277699758    0.323600621819412        -0.0279635264000811      1.5638106314006988
1.0000274102463655        0.0024094289573932145    0.3335439513509521       -0.01943851633691737     1.7001494158227788
0.9998995183851243        0.0024917334099197963    0.33849501978399715      -0.013129633192762313    1.8618867735843572
0.9996612424133929        0.002503775900474586     0.3377242224788768       -0.002936988449725644    2.1153226095786155
0.9998411512749843        0.00264948149018319      0.3478677020785454       -0.01128965359403499     1.8197469724891189
0.9985314464325171        0.0022066078827098477    0.3141434195731519       0.00835826376176295      2.696098808548108
0.9988181459018697        0.0023916297234457718    0.3245289067116503       0.011469228411325971     2.5662762956906193
0.9991079812839398        0.002546491056036043     0.3356565024691028       0.009700782772591858     2.378544373212837
0.999396260738111         0.002673334850169811     0.3459426694784617       0.003580505502446238     2.143493124433738
0.9981925143836832        0.0023741611726926693    0.32760623492223634      0.00604448749205547      2.501071296737104
0.9865922562572984        0.005313623028455271     0.5131889020786965       -0.058146091883523855    1.3350991827192413
0.9871063072674037        0.005244106584403302     0.5085053640392391       -0.05624889667379255     1.3464518214858439
0.9876255979525875        0.005124661322017376     0.5033198917700111       -0.05459726577404946     1.3610508948265878
0.9863853004960301        0.005793773352446544     0.5179280463865982       -0.055303097740947195    1.3279904753865674
0.9849526156703465        0.006461971890270826     0.5326634710598666       -0.05664137348750684     1.2984422614776783
0.9856483472764119        0.006192112771712229     0.5260304986781494       -0.05562218450626837     1.311019624818102
0.9861365423572633        0.006263171896320902     0.5229518463771229       -0.05293086985156135     1.3184926097337322
0.9853619591569928        0.006596274673901498     0.5306663239884138       -0.05399266231792804     1.3039215703791311
0.9845925439201079        0.006754300491601038     0.5369040229062031       -0.05610216194398126     1.2911899704179766
0.9836440488536403        0.007124917785217991     0.5452838775426412       -0.057326339250020564    1.2770279516773282
0.9841763472319003        0.007004155222565557     0.5411605757785923       -0.05609316395666398     1.2839161749211259
0.9818597932983392        0.00764079197295114      0.5589967787219648       -0.06026056695051035     1.2556590829721357
0.9824709424836854        0.007679754908362417     0.5555878134756678       -0.05804275439883027     1.2610538356563732
0.983046031266706         0.007679450544683615     0.5521478252318567       -0.05606050076093166     1.2658249326831947
0.983528598538506         0.007626855474189656     0.5489461077229145       -0.05463671211129418     1.2727280864814878
0.9880368430880987        0.005514144092020387     0.5028301311100797       -0.04915018735960796     1.3679168787325116
0.9889680342103575        0.005807195139875664     0.49793222025033473      -0.041547070923084045    1.3846062822379215
0.9884371619212046        0.005901457372247437     0.5028821190528349       -0.043855119297715184    1.3703111580615284
0.9915810774013548        0.005057621382370728     0.46823728149253835      -0.03149715842187476     1.4792624954341134
0.9919051050308756        0.004922936375512901     0.4635766224897248       -0.03047656930609813     1.4937264714476355
0.9932182782991275        0.0039916316888455585    0.43697764205101136      -0.030297974365363817    1.5870386680498794
0.9928976446801477        0.0042875409244483706    0.4449338683090172       -0.02950681263761838     1.5583553674447435
0.992567976738607         0.0045466938683730185    0.45208583840641353      -0.029307064893959785    1.5327807476672772
0.9922342219964674        0.004757998945719986     0.458291183721344        -0.02968063843042523     1.5110878409227448
0.9893015063205097        0.006148417729436672     0.4986683072745233       -0.037025475751571814    1.3860020021183421
0.9897369552655821        0.005979067395617761     0.49372509784152535      -0.03568919822168686     1.4010637411270184
0.9901767560173451        0.005698751826999376     0.4873935886290525       -0.0351593829077989      1.4196059551721878
0.9906960178045313        0.005614243879542638     0.48233520683482783      -0.0325796285523407      1.4327019674915797
0.9911287859379371        0.005556361090456526     0.4781798630280862       -0.03024953556651463     1.4466983728540057
0.9915140778852285        0.005475161776645631     0.4740436452041625       -0.02836940242014394     1.463936516205269
0.9943768661164522        0.002485037047168629     0.3983506552600176       -0.04240115572150351     1.7325365962082835
0.9941214241486637        0.002921332583212489     0.40874434626559536      -0.03725382769789876     1.693747741741147
0.9938364917485994        0.003316856138868616     0.4188774573167267       -0.033811621337488836    1.656674200398326
0.9935321751818528        0.0036701699810631674    0.4283255981525009       -0.03164725119382735     1.618306311224045
0.9966665528151741        0.002130364000639746     0.34781765356524996      -0.020010073508431495    2.1975803347604503
0.9961282942858903        0.002275231714628691     0.3618438031200082       -0.023859792721591565    2.063814468998818
0.9949446778917053        0.002474998829248239     0.3874151871136553       -0.036480367461006004    1.7983786748348207
0.9955439445856157        0.002404771177813574     0.374899897951011        -0.029602009629508864    1.917627519586569
0.9970234569321691        0.002476907421458767     0.3503762116977815       -0.008411540583213863    2.198469315123519
0.9978178208273959        0.002563102522430864     0.34141323288479825      0.003589425162194257     2.3287332312970737
0.997400322230049         0.0027757413388617455    0.35540064679078265      9.729036483617912E-4     2.179402090539371
1.0008091917187818        0.001518124451215124     0.23115567008781215      -0.08167886459570715     -0.4942747122185008
1.000727463907112         0.0017610862126070251    0.2660693011614019       -0.07216839028781041     0.1360353840206858
1.000641754408781         0.0019749767194821443    0.29173502624738856      -0.061933655653667936    0.6151874473539073
1.0005381992427242        0.002192983231470404     0.3134406233840828       -0.051226022501154926    0.9342484438484931
1.0008357348243921        0.001292643960216397     0.19414329316770337      -0.08593368201720925     -1.2580694707495461
1.0010448451811127        0.0014252393748038694    0.21403679373166576      -0.08708020871628015     -0.9287800591735715
1.00009895489038          0.0010090164414338367    0.14420238147930073      -0.0446990866229029      0.8908957250328363
1.000361537417245         7.984813714611234E-4     0.06463600213579206      -0.06464774901779753     -5.682598884160667
1.0002002278516635        8.92701267916983E-4      0.0844736826977005       -0.06310506132045        -8.593492885957291
1.0006512743719373        9.972313303519417E-4     0.13389418822295607      -0.0819581873040483      -2.6675820860308783
1.0008368396327068        0.0010891378776781526    0.15717540870641522      -0.08469835973823021     -2.0416612458376124
1.000634528954508         8.369171252167207E-4     0.09810848035434667      -0.07382765326671936     -3.6723123788198424
1.0005156610672095        7.829452675835587E-4     0.07722478554670488      -0.06744657801596403     -4.938438119624485
1.0004682608155613        6.886537819451759E-4     0.054555403096712064     -0.05659012306958848     -5.456114871691915
0.9806919535146306        0.00681411880521379      0.5621778595722097       -0.06849986103108467     1.2494766013301735
0.9802405015331838        0.006914313145687988     0.5652435946237486       -0.06903254021580374     1.2461520694905952
0.9809117335278899        0.007153440353700223     0.5622995093198552       -0.06588865268567164     1.2478931932594937
0.981194279078829         0.0075021472251470215    0.5622197738200646       -0.06307228084065152     1.250806179763279
0.9778377732862323        0.005351293590146868     0.5736554308319876       -0.08299694993169317     1.239814611263695
0.9783164388066978        0.005777256657128336     0.5722106825906271       -0.07961289805678091     1.2414697244937203
0.9788147273214406        0.006162337355824208     0.5706637821357922       -0.07643204943605264     1.2424617536596472
0.9798261265862361        0.006727013706889078     0.5669347083272492       -0.07108519943567992     1.2449621156941484
0.9793011267288223        0.0064805866850127965    0.5690226687214456       -0.07363037632440726     1.2426706359294581
0.979967801804267         0.0071445327320979425    0.567724955967156        -0.06838001342496632     1.2421361386701018
1.0000394064072928        0.002622221963117277     0.3468658222164112       -0.02018099648357456     1.624034313606342
1.0004057070343422        0.0023898658088524786    0.3301522412387832       -0.040832186710406136    1.2007420157687323
1.0002220971032747        0.0025351338798815285    0.34119451373439663      -0.029650759731832215    1.4247507207821553
0.9996710386050247        0.0027900440061578977    0.3549820543654674       -0.00555168048380717     1.8867632095002442
0.9999338030440855        0.0028391616917247627    0.35893320084409946      -0.015822294864385883    1.6430149357540833
0.998507399631551         0.0025750060663925836    0.33636489221663973      0.010553528348905853     2.4155354282737282
0.998824508394037         0.0027405857146042475    0.34609725079395615      0.010776549149016849     2.28806321956902
0.9991344475765822        0.002869250173403685     0.35522884114598247      0.007060805135580476     2.1249514864993553
0.9994462794014809        0.0029734323335874314    0.3632781850615081       -1.0066254923226429E-4   1.9314738344341833
0.9981666041876828        0.002782770778295572     0.3488980674600197       0.009121139827699472     2.2691806700884958
1.0006699073505987        0.002455486551071261     0.33094371323866273      -0.05341590663039048     0.8990578529725398
0.986910318652218         0.005777685461490917     0.5137510622566013       -0.052919881153071203    1.3379856410987363
0.9874846011731525        0.0056822536999876945    0.508552495289316        -0.05076271702216031     1.3519318900453383
0.9866661902960306        0.0063017134566290475    0.519366552884153        -0.050172543884850464    1.3288761676605176
0.9850206976605325        0.006970405920310293     0.535408479357726        -0.05290813718053792     1.2954220013898272
0.9858469629176596        0.006724969912052403     0.5281797137599585       -0.05097190443289632     1.3095631202956677
0.9863744895847755        0.006795159106904194     0.5250713352434704       -0.048065575402896014    1.317661847979437
0.985503755757332         0.007158301967594171     0.5334941608196636       -0.049601689575784154    1.300674339740142
0.9846152326492654        0.007304697935154521     0.5401959443983553       -0.052413789489715736    1.2868964313188125
0.9840938952341056        0.007603897059915312     0.5453362863359855       -0.05261819786155476     1.2799747994451771
0.9837781161834447        0.007922796155681824     0.5492337523229174       -0.051904480914531224    1.272354141047484
0.981450522597164         0.008158222829885745     0.5639350560794946       -0.0585707089110395      1.2495432891230591
0.9821153913497902        0.008220257276486367     0.5605425516998311       -0.05610449847531449     1.2545876532125997
0.982759113867857         0.00823216123381932      0.5569754119059654       -0.05384913857385918     1.2603804956039546
0.9834214217128033        0.008184255403906405     0.5529090301746143       -0.05174053912400905     1.2668524576371347
0.9879184155267777        0.006094512673081113     0.5084640155573846       -0.04526407717441294     1.3548166084052822
0.9888471494547221        0.006302411437735861     0.5034663476755091       -0.03853422097943188     1.3734509317436512
0.9883622937749568        0.006456794846196802     0.5083676573129227       -0.04017281782660038     1.3592610156855598
0.9892549087798844        0.006668729338639861     0.5042491724381977       -0.03364030816837835     1.3745095424846168
0.9936529975310655        0.004143684887448454     0.4343269264701563       -0.024859375655786133    1.6043254597998562
0.9918454979275705        0.005331109867962703     0.4694306107029908       -0.027287475367064908    1.4769347505214012
0.9921949541553218        0.0051985447726903755    0.46466547522287655      -0.025943456349818716    1.492790928213312
0.9933052482203069        0.0044719439465602225    0.4434165660490322       -0.024268821918480094    1.5691663247968604
0.9929452245424994        0.004776542179154331     0.4517389030957781       -0.024146725842950537    1.5393352937877365
0.9925676133938898        0.0050223911940584925    0.4588930499298791       -0.02476138043627422     1.5121992971444103
0.9917631355348118        0.005686028634455704     0.4748300442742842       -0.025019855683481484    1.4629564784937918
0.9897245480368196        0.006484041103189942     0.49912816462079057      -0.03213810876240191     1.3883645480414601
0.9901850656826894        0.006270564778589555     0.4935882182642019       -0.030844196224404426    1.402272043070574
0.9905629702055645        0.006021764261081375     0.4880376473535053       -0.030293169205232263    1.4206030809285153
0.9910007721459657        0.006007667448183747     0.4846710374211723       -0.027608706762317997    1.4298444122050329
0.9914570221437811        0.005886316482022534     0.4797865492114015       -0.02555093382989015     1.4453574596311742
0.9946714195113279        0.002969405485672838     0.40055223687947555      -0.03092157382303601     1.7429364032037251
0.9943533224340011        0.003418956429659637     0.41312621112845255      -0.027429109371522768    1.69303304967535
0.9940098480138148        0.0038098594371314943    0.4244874557083445       -0.025598635788727443    1.6417836182296888
0.9965188294090788        0.002657460842730575     0.3641581466417872       -0.012051084603897365    2.058617566397167
0.995955704214907         0.002838792610369698     0.3774513371565565       -0.01672772781911555     1.9289963449688263
0.995324628957993         0.003028111576905645     0.3912429143381578       -0.022104894963228795    1.8267450939289576
0.9969280058274145        0.003011908520479939     0.3694279854795619       -0.001993472929005411    2.0444519537958197
0.997789265579196         0.0030178428339237458    0.36190828807041336      0.007311756456079254     2.13635936332108
0.9973677084946209        0.003290156784364657     0.37552450361294426      0.0051754008635350604    2.0103015688166455
1.0010317696699162        0.0017038568170663656    0.25176999879368406      -0.08348437374937509     -0.3205857180370279
1.0008989210752786        0.0019681047724794416    0.2846227011112212       -0.07362112394526066     0.23451985515732443
1.0007957798987535        0.002212660148039634     0.30977340244335755      -0.06384551450394772     0.5951300776818135
1.0010496077202984        0.001185862578782992     0.17757352406479987      -0.08582452349715945     -1.6139871165537556
1.0012676073504867        0.0015509032232849745    0.22990757492017602      -0.08726048113500505     -0.7566315708059507
1.0012881129010258        0.0017606724349262027    0.25482982315573993      -0.08573569270735298     -0.35996257244904717
1.0012763392129977        0.0013000530271334789    0.19767266671708458      -0.08578252676893999     -1.2222822142546494
1.0003400622984817        6.240154405150001E-4     0.028489033159955702     -0.040153848266980235    -7.460362662630179
1.0008173602530528        9.115577560989466E-4     0.12357376939427835      -0.0784738739418725      -2.848937807966758
1.001024723813094         9.741169319087369E-4     0.1435604857897389       -0.07972409786295535     -2.2275360051076363
1.0007946480424048        7.585670257891958E-4     0.09573491323069548      -0.06882052641326576     -3.5277495369759495
1.0006248307045933        6.806091673919504E-4     0.06856484793043748      -0.06073620874607583     -4.619708018911498
1.0004992125902759        5.572176627742468E-4     0.03902278975323412      -0.04368497576780401     -5.967398411025562
0.980470688597666         0.007418506811415368     0.5660011311312375       -0.06554517073883775     1.245624365340932
0.9807671841997964        0.008061660510689671     0.5672420599467244       -0.06113338165344951     1.2450186096333324
0.9771619318365241        0.005563148727573867     0.5779547567446737       -0.0832469747730075      1.2316058819186357
0.9776889292609976        0.006034986118138127     0.576406251685389        -0.0795583540028304      1.2341954661009444
0.9782344949790345        0.006450007683002773     0.5747560957863049       -0.07612649565756148     1.236238297061286
0.9788100781501763        0.006823858810353564     0.5729214044516581       -0.07283123876396223     1.237967139400545
0.9794432700527749        0.007145990749782849     0.5706480662603955       -0.06961552142229911     1.2402731306517356
0.9798798228744479        0.007505216932929831     0.569671781125571        -0.06658337919891211     1.2423751330822927
0.9810515917385271        0.008690834245888407     0.5687769506198507       -0.056917189267377384    1.2440799799209703
1.0009635770366603        0.0024760880408000526    0.32716204929366693      -0.06522102282895335     0.6109412751689045
1.0001987232340288        0.0028070844179397796    0.35715828753230067      -0.027376200107396876    1.4101567915906355
1.000490121732722         0.002714134308078451     0.3500497327975584       -0.041565926708872776    1.1419658300635118
1.0000916962054418        0.003072591738588409     0.37110484561626317      -0.02242252609343787     1.4637933343889011
0.9997594761257883        0.0030925040344425493    0.3713953585035456       -0.01023296387178125     1.6866787123958746
0.9994986848022052        0.0032228188805793       0.3761731662296023       -0.0032660750022724056   1.7746448877674077
0.9999745451109836        0.0033027570303637566    0.38182974642254086      -0.018267409033215713    1.5013488836164033
0.9985183572636396        0.002961551433591369     0.35744375878823426      0.010826224011365577     2.177092290843223
0.9988662765227797        0.0031023998543217354    0.365969777685982        0.008741560320356426     2.0558333248832787
0.9992161328015543        0.0031911443730979643    0.3726697586354115       0.003342804986987691     1.9128197925914427
0.999372581178114         0.0034113994969074664    0.38408511688720265      -0.001400922216319298    1.7638607361264789
0.9981792966137728        0.003209925897599669     0.3693356960826896       0.010206180190949208     2.070771724346803
1.00082594424282          0.002747118420001157     0.34764911616063476      -0.05555204888169054     0.8499228063467115
0.9873177645724248        0.006342026838653048     0.5149099848845858       -0.0466069096497811      1.3403868454667125
0.9869148770006534        0.006850765045996659     0.5217848039599825       -0.045057566758098626    1.3282523117206653
0.9850977671338859        0.007546796752702889     0.5387612150069768       -0.0488791095157482      1.2916618193670386
0.9860890127903023        0.007355101217520519     0.5311153984518843       -0.04567903856692102     1.3065959646980307
0.986617970303147         0.007223676678793103     0.52670830754395         -0.04403978252771147     1.317392058754171
0.9856029103464395        0.0077571801583956185    0.5371392110576353       -0.045375936768221166    1.2976779151166402
0.9860529988289912        0.007961426480855498     0.5359838184633854       -0.04213147175652215     1.300512760774267
0.984622241683366         0.007911264049600172     0.5441368263501384       -0.048646067322084756    1.2827584275979829
0.9840790291585984        0.008277666600442497     0.5497320538980253       -0.04868409530787333     1.2744941098269347
0.9817453065697533        0.008766076252537724     0.5655091528837347       -0.05433565405545316     1.2485132961246797
0.9824258111510327        0.008821557495965048     0.5621975325067288       -0.051764373279890384    1.2535853802146504
0.9830896635627167        0.008820479776101306     0.5586431711281922       -0.04941511435800588     1.2588509661579008
0.983669399412344         0.008730378042150298     0.5549505461978641       -0.04775443657396866     1.2659115127993212
0.987895071947125         0.006682900399102038     0.5136523190773356       -0.041147051426733944    1.3475920838473454
0.9887639725031051        0.006834057717959636     0.5091795045406663       -0.03533095999756253     1.362096626410951
0.9883189394882828        0.006928845769276638     0.5130203176842665       -0.0371840127480608      1.3511670094627266
0.989190401128504         0.007218282820845847     0.5103571602476937       -0.030495911860620107    1.3611898133603806
0.9897103177765332        0.007029052525270311     0.5051413219522235       -0.028678859478301667    1.3754385031925211
0.9941121542782456        0.004307232229645063     0.4322528071747506       -0.01898412667746484     1.6262698917352318
0.9937461087569387        0.00465118882408605      0.44211771146238815      -0.01882233780713805     1.5810909274599283
0.9921146375578311        0.005646366266100879     0.47160100314454817      -0.022880362127335654    1.4723450867573191
0.9925028902597784        0.005512173407801202     0.4666922855634294       -0.02118066084319464     1.4920029606861949
0.9933731032831146        0.004991875324834251     0.45135894880319277      -0.01883629935989187     1.543678770137441
0.9929612052088028        0.005347702832831889     0.46057393393533624      -0.01907805655517122     1.511628952531463
0.9918844600963448        0.006091414892802034     0.47953389632809607      -0.021265067403941764    1.449245000213178
0.990204514512785         0.0068212445615647615    0.4997315197633649       -0.027056256815068503    1.3908476190100174
0.9907562393772906        0.006517593372091561     0.49259350876674773      -0.025633141249563153    1.40882392641851
0.9913686380410838        0.006358665870205994     0.48658960145764313      -0.022847996648921755    1.4285861149890666
0.9949086845846076        0.003492412857270537     0.406964767135165        -0.020444637090764693    1.7422286684739403
0.9945729054337162        0.004008728449679305     0.42150433606901677      -0.01775455466858999     1.6761536704506137
0.9963978821350811        0.003241405777534953     0.38249956018178694      -0.005771111643156838    1.9275506567837775
0.9958565306501348        0.0034225616440311337    0.39357296738695946      -0.010214439163661751    1.8472486517146784
0.9953914412676517        0.0035938384339334987    0.4032043754759142       -0.013826150321244898    1.771899738128441
0.9968609959849561        0.00364719297816466      0.39130047926297434      0.0027644142054291903    1.8939279206369604
0.9978057754790174        0.0034878090961243027    0.38163708994592277      0.009052238390310262     1.9718066319899135
0.9974230474964787        0.003802235218294445     0.39434128339398505      0.007672592702388757     1.8908971023821828
1.0011862455556169        0.0019428672501479224    0.2759669955994713       -0.08199843231665939     -0.06586092055956295
1.001083817176909         0.0022122300064147584    0.3036454845203253       -0.07432739693263725     0.293979740879303
1.0012832900106206        0.001033204556034524     0.16230121888001567      -0.07884423513313911     -1.8141738216593877
1.001463968936018         0.0019277159663201914    0.2707458829663892       -0.08546805157722691     -0.2273481613279452
1.0015071147686623        0.0016857647637613681    0.24542748286165547      -0.08668442839104479     -0.5493763112372001
1.0015121257984474        0.0014282210431311312    0.21664274043670187      -0.08511753448687688     -0.9475238562673517
1.0015022002022123        0.001176636694666871     0.18742973220841921      -0.07995643082528424     -1.3629086129814174
1.000357660053367         4.3858587636008516E-4    0.01636381745798696      -0.02386032782010541     -7.160882210103892
1.0009746535576185        8.108014787550144E-4     0.11611952254374204      -0.07155031658621964     -2.8401923237286955
1.0011880990423223        8.135368309575755E-4     0.12956302154313581      -0.06941805482167542     -2.416652929069795
1.0007977848761538        6.279123040605781E-4     0.07706870357704426      -0.05780922333951773     -4.097620157464427
1.000923199147186         6.755450899861343E-4     0.09361594912739651      -0.0619750248159295      -3.36761906246117
1.0006982092427572        4.997140969756169E-4     0.052919889057312354     -0.04466930916759074     -4.8278625384597476
1.0005552468359642        3.5671282553485865E-4    0.028706004043891568     -0.02696445207982186     -5.777008638051324
0.9800925304425584        0.007985511360155814     0.570561917675854        -0.0634201017416085      1.2401247614119122
0.9803458633852347        0.008610432296861308     0.5720631813067266       -0.059423844258498386    1.2394374902445013
0.9764196854046291        0.005794519672848154     0.5825352487493672       -0.08354558250744226     1.223590860459433
0.9769965259036696        0.006312954652617236     0.580899247528018        -0.07959113720587412     1.2266623315221319
0.9775933236867962        0.006768401092386739     0.5791700690684211       -0.07588487394666908     1.2293879775272398
0.978216974021603         0.00717967865934208      0.5773072387156546       -0.07231190074181391     1.231853646805259
0.9788505502711118        0.007525022323429658     0.5752615193144203       -0.0690036429828008      1.2346901782760236
0.9794673839543616        0.007815704057767072     0.5731598023712468       -0.06595422504300376     1.236666897040597
0.9806474781855083        0.0092288036221547       0.5735525035392257       -0.05540313742119312     1.2383400355213798
0.9813577762462797        0.00931116056279064      0.5704442173584033       -0.052780172204771       1.242490976392842
1.00126542489069          0.002471601370260424     0.3213656295900778       -0.0742189224592601      0.3904216406024718
1.0011456934505312        0.0027565329276116332    0.3432206639734536       -0.06621889677524075     0.628977637227778
1.0004142816126034        0.0030584975240959913    0.3693681318208031       -0.03552506966714109     1.2167821906718148
1.0006941915513856        0.0030057535547069586    0.3641472655946833       -0.04707948135619591     1.0300618013199772
1.0002680062479075        0.0033342831263333517    0.3830999524697271       -0.02869740797335264     1.306828006490127
0.9996972511930157        0.003444100110322233     0.3873562731476255       -0.009863045530971329    1.60034511439888
1.0000554048995893        0.0035694385345533173    0.3934366223101711       -0.021151031463104205    1.3909195873434375
0.9985919513816791        0.003377072164638534     0.3778721594244408       0.009441254330386811     1.9674161331573299
0.9990396038576741        0.003504110638010171     0.3861355570311612       0.00422700743848265      1.8292885038876148
0.9994100548718017        0.0036935001343767608    0.39634102890016293      -0.0038368500207959593   1.6391067700676631
0.9982542018507989        0.003669473610610379     0.3894334092443233       0.009588360890694687     1.8972450302853268
1.0009874134196648        0.003073925550223198     0.36438833817526395      -0.0565911514197256      0.8310328136456029
0.9874438430141279        0.0070104144013310825    0.5195237560111846       -0.0413029503978568      1.3333749449879415
0.9870699174595728        0.007432563948558934     0.5255176637545902       -0.04047314147478171     1.3211024661293058
0.9851624380317631        0.008162443078447589     0.5427026021274673       -0.04489696530260024     1.2872136662060305
0.9866009765079751        0.007864582300199797     0.5319499871633991       -0.04012142577195433     1.3102562470269288
0.985705297970174         0.008362038774824674     0.5410886644218346       -0.04138251009260804     1.29028091740466
0.986264790605436         0.008469228490074317     0.5388408554305685       -0.03825884818066816     1.2960618573102456
0.9846792559486869        0.00857375178320651      0.5483555341421461       -0.04460245514332561     1.2780975683145803
0.9841768754741036        0.00897651583762838      0.5538571203209929       -0.044451430714311284    1.2672983253078287
0.9820734692274661        0.009389704671637173     0.5672955322701814       -0.05002835484813694     1.24689598113555
0.9827976035759424        0.009461486610806572     0.5640895223201627       -0.04715503979029826     1.252792060573503
0.9835800071534982        0.009392972592672895     0.5597195221846318       -0.04461860274285646     1.260320705060259
0.9880180456188773        0.007270810242901374     0.5181297742780006       -0.03661486292954285     1.3392404851003066
0.9886198034221263        0.007434211241549049     0.516000894976652        -0.03234577026569559     1.3469403282611123
0.9945039312314347        0.004519106780900858     0.4327147593412216       -0.01343025936483876     1.6250146813015984
0.9892188373220927        0.007818293844983023     0.5165507127285123       -0.02688602223530143     1.3499161887393145
0.9896958214317562        0.007591209302853696     0.5114687579157272       -0.02548740093849484     1.362037526767106
0.9901961096087013        0.0073900071311055965    0.5064094247222345       -0.02375747318363403     1.375741897001484
0.9941982461546897        0.004814216328988476     0.44120504816395006      -0.013571829777981574    1.5847799243378768
0.9938355757138407        0.005181706030666506     0.45101654975862676      -0.013665812521745724    1.5505967586175962
0.9923993876873298        0.006057608568893925     0.4755709671016004       -0.018006952210202324    1.4628899578294683
0.9921191203888067        0.0064368684249539775    0.4829348334850422       -0.017497406341179716    1.4423743461529213
0.9927797928880612        0.005801909338805329     0.4691170946107065       -0.017084960379234574    1.4839464319301985
0.9934460140003644        0.005526259438059255     0.4599691294056063       -0.01416362810504297     1.5190182484097614
0.9931146515045153        0.005807677131084074     0.46697319631261386      -0.014662485846585966    1.489974193183506
0.9917559671662343        0.00661791393537108      0.48767508977106183      -0.018751571578478204    1.4254656321422072
0.9907342454922766        0.0071731565193292185    0.5008136306988263       -0.021806909510153325    1.3889681349346226
0.991282453804762         0.006918620188862214     0.49447643193601626      -0.01994782565057415     1.4088411784699295
0.9920882879644042        0.006787641176340634     0.48820425801749606      -0.01570273339534449     1.4282646488407509
0.9924739237618128        0.006629772419086952     0.48378832640639297      -0.014121205132999541    1.444030261052365
0.9951667990814106        0.004016317115597021     0.4154407342113004       -0.011695930338390925    1.709950453305751
0.9949556426029509        0.004497453881875712     0.428372043094464        -0.00939406910038785     1.6544626498985746
0.9962672267239946        0.003870518069433714     0.40223619810789213      -0.0015502562007115837   1.8104356549274192
0.9957092370376519        0.004013234795666426     0.4104271009740797       -0.006076587609567371    1.7477328148011837
0.9971221017677454        0.00413275189899852      0.40629317180438285      0.00652144604344314      1.7930072597027695
0.9966582771278858        0.004296735641768334     0.4128208991872047       0.004112571166599025     1.7576649256468564
0.9978951469016781        0.003982564060901169     0.40094577788449787      0.009160934686058273     1.8228508505106384
0.9975322222848256        0.004304180590943302     0.41185994832652034      0.008258016425610762     1.7485766941879242
1.001406991830835         0.002203380000540965     0.2971825889957715       -0.08148318324806714     0.0740407217990595
1.0016302981050316        0.0020916051721779094    0.2845914924125355       -0.08488642062225801     -0.10017716770527411
1.0015206119043207        0.00246035328118453      0.3164458251712179       -0.07939965016775467     0.2209831409198451
1.0014217271864296        8.0617912474905E-4       0.14247707091131415      -0.06503723588722159     -2.097570847242739
1.001520986085189         9.75685620518998E-4      0.1658107197773528       -0.07190327053050313     -1.6659137295149542
1.001765796085484         0.0018811043647612262    0.26492014922331086      -0.08597976240575902     -0.35332238043283853
1.0017692679570598        0.0015669208213505697    0.2347218693806087       -0.08400620963960131     -0.687208906954206
1.0017507284620437        0.0012889141132278465    0.20647424520167504      -0.07889772309711963     -1.0349632579252035
1.0017175905864406        0.0010455592901911115    0.18133184351590947      -0.07126085296177705     -1.3160118767483773
1.0003880090411006        2.245876225743553E-4     0.012181195660277864     -0.0111886905151202      -6.604844398678146
1.0010923867897037        6.503163289702634E-4     0.10365805897782097      -0.05937877444359286     -3.0133779089903485
1.0013318128964674        6.066025653278634E-4     0.11739363466508469      -0.05318679038750727     -2.5170472247582896
1.0009323906111525        4.8584477277425976E-4    0.07335899537100683      -0.045964338203222696    -3.879994864051906
1.0007796103909496        2.895013393790716E-4     0.04536416382250443      -0.026283882686500743    -4.740619734630489
1.0006085562747802        1.3013402000717255E-4    0.025437117488689636     -0.009993001191213933    -5.562902830013438
0.9796544526570706        0.008468700973222089     0.5749674498497529       -0.06207487698494187     1.2345288657560352
0.9799259018538956        0.009136237292453938     0.5766563211767122       -0.05798255998174411     1.2334935772891276
0.9756028307891944        0.006046217057163622     0.5874043219785626       -0.08389980436014467     1.2155860608636024
0.9762347277376282        0.0066182265250293955    0.5856946848874488       -0.07967177885682407     1.2190336410956701
0.9768887616796085        0.007119985988598715     0.5838922310219606       -0.07568842214789794     1.2221964380643124
0.9775681638429913        0.007570533783617842     0.5819796239896201       -0.07184973997254888     1.2252273420306492
0.9782626875386775        0.007948354338726841     0.5798742770634164       -0.06827669519344108     1.228238480796666
0.978955375101884         0.008250859562856424     0.5775854966031934       -0.06501353438096989     1.2312560487088737
0.9802563768251926        0.00976995592026657      0.5781664451157993       -0.05397339646678532     1.2322978704286809
0.9809561094061595        0.009838143129428035     0.575221033403622        -0.05149852471551462     1.2366281418478788
0.9816776384486617        0.009943718556075735     0.5723971828072202       -0.04866126908679352     1.2404138487005103
1.0014718579839337        0.0027210239849135356    0.33576407734108754      -0.07478811993192548     0.43005920514357115
1.001352722460292         0.0030566069040546978    0.3583529856412521       -0.06734622919549649     0.6274831560539617
1.000695260928006         0.0033839863628335612    0.38309294281753237      -0.04360315783864946     1.061648444744214
1.0003762620826353        0.003617845027453753     0.3948491864114484       -0.03146292197600773     1.2233376115069365
0.9998087710222823        0.003815105544529091     0.40280617212133957      -0.014242219877292921    1.4711865876649701
1.0002075181488457        0.0039024640629505792    0.40638615783979687      -0.025625408848469377    1.2960618770011134
0.9986988500664937        0.0038162987429852346    0.3973047837394352       0.006432455120393939     1.7932414298789559
0.9991212411210671        0.003936619011022352     0.4044146576003071       3.213293665808836E-4     1.6751789389629386
0.9995244320878931        0.0040385403091616106    0.41020498695531         -0.00799663829006096     1.529436600864799
0.9983573497524665        0.004144548146913373     0.40835393663360753      0.0074617861652881865    1.740237635884912
1.0011675022546538        0.00338929033353947      0.37832233842040175      -0.05824184970688806     0.8118104062002997
0.9876206011053632        0.007665238057053428     0.5241730187074434       -0.03627075436135913     1.3269694334439432
0.9872284644137932        0.00811218705071641      0.5304441492493764       -0.03565503872185551     1.3153787293090853
0.9852656949579642        0.008824342321155964     0.5469959920014525       -0.04077821565368167     1.281973771096127
0.9868681289280883        0.008627691198289943     0.5368996498555633       -0.034584242088123794    1.304135371968728
0.9858800313500679        0.008998985055118126     0.5451283550227299       -0.037174091379852885    1.2852963180312316
0.9864419238743085        0.00903342745958619      0.5425745423155304       -0.03448186856997184     1.2929944893049659
0.984768457664442         0.009290664667094047     0.5530193481614409       -0.04044705207573077     1.2725788869729329
0.9842312636684702        0.009575918934590803     0.5577342354530013       -0.04119241482237794     1.2639198071358626
0.982438813478126         0.010029322877854416     0.5693185241720449       -0.04566159100091996     1.2449470399999771
0.9831865221804094        0.010054469483680792     0.5659819297356955       -0.042872199334644506    1.2513489353837721
0.9839094551782939        0.010118703076531335     0.5630349465069435       -0.03987442527106297     1.2565932220475806
0.98821489823253          0.00790572642259446      0.5229815721441589       -0.03178385893114965     1.3321133889027956
0.9887911526071147        0.008139301189117962     0.522192226403232        -0.027478987185056303    1.3350593126726176
0.9946807076875708        0.004967903014315736     0.4407305277028621       -0.008349080110204491    1.5995971010037222
0.989316111997391         0.008381824904868638     0.5221571532738545       -0.02350860351400613     1.3381330784353151
0.9897072203921248        0.00814157032513679      0.5176133117256518       -0.022583798170884854    1.348907339688122
0.9901595610556275        0.007948776335919493     0.5131954290705444       -0.0210680063729872      1.360315529066306
0.9906750725328632        0.0077742189503393       0.508589555140849        -0.019061038185135087    1.3733241456094643
0.9943268294388578        0.005369163915925053     0.45127169536865214      -0.008574424504525759    1.554441154109148
0.9939261987044122        0.005750781628779566     0.4610118629878855       -0.009268182523204086    1.5192385864478484
0.9929208888586729        0.006284755232707101     0.4759111141968337       -0.013095220723908067    1.4661336149931061
0.9934655468204459        0.0060788708602989355    0.46950529171232186      -0.01064250974310948     1.4875764381370236
0.9917928983513998        0.007114171415715402     0.4944059846816759       -0.015817673759895286    1.4079186661481442
0.9913203929459401        0.007578391367204514     0.5030382524754234       -0.016306891407193644    1.3865721609111668
0.9923075118629037        0.007131099646006303     0.4922076623344887       -0.012671626286993849    1.4146146608863042
0.9928184391516284        0.0069575249982587045    0.48726752927065814      -0.010455751254113107    1.4315734581989243
0.9954823544544571        0.004559427784142242     0.42599221521300296      -0.004228314452936712    1.666616037982024
0.9951978745819466        0.005068793575848951     0.43981386316850674      -0.0035668718162523705   1.6088071570181575
0.9961254230613439        0.004600666567490068     0.4235761487747886       0.0014302642428418238    1.6914348081691857
0.9971379844514383        0.004612733711802451     0.4216558114901548       0.007133274703492243     1.7052354280241986
0.9967361899846149        0.004887999436285684     0.4300741811247955       0.00581198754771967      1.6679379872838478
0.9980041449435632        0.004488688073628378     0.4191007881773347       0.007705950577147152     1.6873190085502852
0.9976179901959851        0.004806940436137575     0.4282479457070056       0.007496648275848605     1.6563536251865123
1.0016990211215795        0.002316787069501843     0.30302536886047055      -0.08322765853462911     0.06204225307229188
1.0018417154436148        0.0021458404626786606    0.28801853851519954      -0.0851853104181541      -0.11188847660351693
1.0017667071472787        0.0025953739462432927    0.3232770191908143       -0.08092877965466293     0.2465462123252344
1.0020837759018342        0.0020383104441367337    0.2790169613450571       -0.08450153539545625     -0.22211184619157046
1.0016148631623976        5.896421492320389E-4     0.13634604257715668      -0.04771693831519447     -2.0355036963813737
1.0016801224402425        8.168484369534337E-4     0.15845000348110003      -0.060861293780854885    -1.7663603643102521
1.0018978324923582        9.001632645669085E-4     0.1767391558878977       -0.061283414017386406    -1.3562203676575355
1.002067281548982         0.0017091735215497698    0.2514235920542988       -0.08239472619887965     -0.4883869802486944
1.002032043969811         0.001396619556439589     0.22374041236198375      -0.07719827371881118     -0.7867546235469934
1.0019722996378404        0.00111907021255342      0.1979965097811405       -0.06956370847143421     -1.0907003150830363
1.000418198739523         -1.6276482373246928E-5   0.012021580916321639     0.0012827768893231605    -6.351570487030512
1.0011962389571776        4.1174510384075694E-4    0.09098672302933064      -0.038743624959206496    -3.135874591200604
1.0014808882723656        3.598483538995838E-4     0.11209626824938414      -0.031980584819639064    -2.498947851539594
1.0010309200043186        2.2056868038784508E-4    0.06549797577255088      -0.021683836392980396    -3.8272629281969865
1.0008502897442537        3.906346634490361E-5     0.044546554628583486     -0.0042748113033532495   -4.572490274719127
1.0006541558422613        -1.2457666211657787E-4   0.028537449982021904     0.009469589566759742     -5.387816759108609
0.9791726042057354        0.008990108312920752     0.5796557706368598       -0.06078696767440082     1.2285841404158118
0.9794913418520642        0.00973260431926989      0.581551008485656        -0.05638534808842622     1.2272037060162992
0.9746991964581936        0.006333437204920182     0.5926209305213767       -0.08425292299634768     1.2075717307312805
0.9753940167632698        0.006950532960690918     0.590800637060037        -0.07981599214523032     1.2112906320433885
0.9761123715530471        0.007507092462452296     0.5889357397984726       -0.07553791469743111     1.2147994730282579
0.976856249990742         0.008002943232684504     0.5869677856767415       -0.07142106089571813     1.2181534884197307
0.977612815472049         0.008416118527012819     0.5848246516251817       -0.06759840968420273     1.2215260977791773
0.9783947536524797        0.008751553276378483     0.5823908262345859       -0.0640017177541472      1.2249685928769753
0.9799427659457383        0.010378608357440105     0.5826622339653441       -0.052137968444174544    1.225295934016853
0.9805857792319591        0.010288120140131429     0.5793285056264957       -0.05058583635847652     1.2311361958842328
0.9812172041966909        0.01047584969239846      0.5775241634435423       -0.047731049543514675    1.2334374085303959
0.9820250407209868        0.010612723001713906     0.5747459373530659       -0.04444749343834232     1.2387592538097858
1.0017806259565352        0.002990047227752399     0.348819987621409        -0.07648291991092117     0.4328848541228639
1.001586693130019         0.0033831592387144655    0.3729176200796093       -0.06815306654154578     0.6416014349671594
1.0010018607942812        0.0036958179221974314    0.39394219734671104      -0.05028237345342339     0.9541805674000876
1.0006524744735186        0.00389638236274817      0.40476457004412303      -0.03874967981624267     1.0988370372576945
0.999904628721247         0.004147158084104027     0.41515485578856115      -0.017411587823422472    1.3722867184363812
0.9996286514056759        0.004325505097069646     0.42060419721738923      -0.01134753900378004     1.4388129795577924
1.0003234399305758        0.004252111130741784     0.41871878263566903      -0.028270760143183877    1.2229866122421498
0.9988296350556327        0.004266213293642603     0.41501380576401875      0.0026370307018366078    1.6426385262579315
0.9992731912054097        0.004313226349074516     0.41881555574124857      -0.004190534606004073    1.5392362475028423
0.9985172531356437        0.004661294580879366     0.42686480626336737      0.003996595640256686     1.5963798756540841
0.9995060267438081        0.004579334060037127     0.4284883529846092       -0.009600641527897424    1.4414131472229355
1.0013810627956585        0.0037422460232134675    0.39221082531712675      -0.059556757427945035    0.8043520439062709
0.9878169782029675        0.00835375832534325      0.5294230592412418       -0.03138964716993397     1.3187594533844906
0.9873979717756998        0.008823835382859663     0.5359321019564592       -0.031041816944649248    1.3058833212199712
0.9853986887826518        0.009558170568244834     0.5519285415079671       -0.03649958098844292     1.2741950953657433
0.9869153649324792        0.009355724181883197     0.5430550833391266       -0.030756771340497046    1.2929702452311675
0.9862029931879888        0.009747088571952379     0.5496850247552959       -0.032135781777892614    1.279544576274107
0.9847203803827766        0.010096207752347802     0.5591788556105639       -0.03678021693658228     1.2625262103025754
0.9828727764788117        0.010711954198622479     0.5716574990784768       -0.0410331256260919      1.2425286099711605
0.9835205019861263        0.010612280890757277     0.5681912051357123       -0.039125235512444755    1.249342190740888
0.9841643694635649        0.01079316841501752      0.5667069635501542       -0.035913964541039206    1.2508962074564478
0.9884267131654213        0.00857258375023674      0.528446708210882        -0.02718451537458216     1.322503029479359
0.9890107800904208        0.008740025334597135     0.527427103805132        -0.023419414922909155    1.325144335647899
0.9948614513248056        0.00553888108192012      0.4519170833575488       -0.003724262755176394    1.5576293651807924
0.989479711682709         0.008840643586903684     0.526481409974558        -0.02061806009685239     1.327095169230982
0.9897251350980977        0.008592551249461297     0.5226442036232292       -0.020434467169102608    1.3403442720192238
0.9901293528570763        0.008516093655629362     0.5200392322451646       -0.018642382672172542    1.3424733973612495
0.9905571347812329        0.008278036592438606     0.5153678138365114       -0.017447336471215       1.3577662009980533
0.9910837133612949        0.00827622381828351      0.5132048676852845       -0.014619544621088587    1.3623487887065213
0.9944676607561855        0.005975501222087396     0.4626655605209478       -0.004459205661420312    1.5155440308908366
0.9940110324326902        0.006390543836563225     0.4724960773423282       -0.005628270175405656    1.4788175005157915
0.9934457407762012        0.006830903811437164     0.48252506025447317      -0.007227799987496371    1.450375778191056
0.9920027763641539        0.007651362180507664     0.5010641865898596       -0.012187864635740295    1.3954845050060676
0.9916717026012787        0.008140799971774155     0.509193254103658        -0.01208489045289514     1.3717499603252445
0.9926020675399156        0.007576141577698948     0.4977101501641858       -0.009180047997935065    1.4009004330119463
0.9931019155385201        0.007387264589790191     0.49300344052519696      -0.0071659054213181915   1.4210347476722456
0.9957688065535608        0.005166831556428573     0.4396578958958824       9.904428246358208E-4     1.619237819425008
0.9954377926143415        0.00568247401618843      0.45295575020686135      5.359008415710302E-4     1.5575442988951955
0.9963733935979596        0.005291325534025217     0.44148597789147387      0.004594151620136367     1.606751183848642
0.997239472614219         0.005123313649877713     0.43703667282687547      0.0069529676774353335    1.6230811616901748
0.9968831641234182        0.005402884478038392     0.44437010949808997      0.0062138059230567476    1.5892921244838898
0.9981089600282284        0.005033251987431546     0.4366948227997391       0.005305053527046834     1.5746211020669616
0.9976923389919807        0.005279995505578705     0.4424313250892723       0.006074371499115771     1.5737813783088017
1.0020296860041444        0.002401395262815591     0.3069897448882091       -0.08420729624369458     0.06303016274519485
1.0020900295132458        0.0027519958775145937    0.33068270546296         -0.0819637974314782      0.2287911690234112
1.0018146541298512        3.25316782052073E-4      0.13688720831265042      -0.02608713632449783     -1.8886892431816966
1.0024016834640783        0.0022292351371049376    0.294203400546683        -0.08320112823876681     -0.0723460850049077
1.0023997130494868        0.001861103993849306     0.26756338994798545      -0.08045279480258076     -0.3239519938557845
1.0019599740490297        6.230576324102293E-4     0.16103092884378492      -0.04487733562667185     -1.5557194770748823
1.0021591757482387        8.962807507263482E-4     0.18931109370886282      -0.05679042646093626     -1.141482970461081
1.0023574118740608        0.0015082180988066206    0.2405148410559117       -0.07480037833578529     -0.5715317513936139
1.0022768356436258        0.0011867126070149267    0.21442417104668157      -0.06676065980076663     -0.8535530213283593
1.000445219288638         -2.751614261558292E-4    0.016548982713422627     0.016653601600350117     -6.385665718864729
1.001309342720581         1.4679308369228643E-4    0.089078194279666        -0.014472608305306514    -3.0503972053313344
1.0016187473675764        7.892049937340206E-5     0.11514532901093817      -0.007615826042793642    -2.34738786869725
1.0011176689015777        -5.053189660824586E-5    0.0694160131006129       0.003784959204849336     -3.630472880120258
1.0009106644321           -2.3140632608847502E-4   0.05391540441530159      0.02058590950872327      -4.283896011655039
1.0006929665003144        -3.9312688491696484E-4   0.04209086693437927      0.033054387154510666     -5.100605032265979
0.9737101574514125        0.006649649453909603     0.5981214916207942       -0.08463275560613859     1.1993922109835182
0.9786262026408784        0.00959256811010332      0.5848771973210355       -0.05944148233563248     1.2221347199748729
0.9790394138587452        0.010514628844919183     0.587279715674727        -0.05418926199390227     1.2202953328310324
0.9744715950914097        0.007327765004294829     0.5962389116512646       -0.07993846995895032     1.2034822582669202
0.9752576035961282        0.007934875420999622     0.59430770677157         -0.07542030985399373     1.2071915529968409
0.9760695737480831        0.0084796036238715       0.592300285440038        -0.0710402326109859      1.2107770466690086
0.9769036958927898        0.008940029931829787     0.5901095289636245       -0.06690766760928085     1.2143814627352123
0.9777497204716735        0.009308603239905813     0.5876805135272914       -0.06307399573444428     1.2182491906707247
0.973473841631962         0.007737995924622977     0.6019114681853844       -0.08007162680453363     1.1958458608156624
0.9797314863370385        0.010985615590581142     0.5866778756473944       -0.05016584583482049     1.222596888893725
0.9805608301967336        0.01097019636147344      0.5831072938413683       -0.04768020167178295     1.2262354991326518
0.9815054697647869        0.011186762393863764     0.5803869120241406       -0.04374521342255399     1.231420140528262
0.9818558877283892        0.011922502657090123     0.583421871295509        -0.03965145860416875     1.227816772136899
0.9824390059572861        0.011327321070511754     0.5774161658704929       -0.040007768281584755    1.236007387968453
1.0021952633815148        0.0030747224580885946    0.34938504605601844      -0.07979133568814471     0.3847469346623313
1.0020125172852445        0.0033846897400326304    0.3680343853304288       -0.07499063123976824     0.5183365949825866
1.0018276041950143        0.0037595091965673074    0.38817862681333676      -0.0682313783387548      0.6791438170915707
1.0011048828595797        0.004056189307160103     0.4076623836211022       -0.049991333270190806    0.9510690264230196
1.0007818280263552        0.004332954250893862     0.41978389191607685      -0.03995957795946162     1.076222059591206
0.9999349597322089        0.004549222360171455     0.42856236825632527      -0.01859536605150053     1.3185108289955438
1.000448686104732         0.00463562897317564      0.4308384418725993       -0.030612769177765602    1.1830045939117506
0.9991044690407042        0.004759438506077155     0.4326492851282025       -0.003387786144286476    1.4912038255903683
0.9987005068718211        0.005275819493048994     0.4460989499503799       -4.125293298315496E-4    1.4852475842958393
0.999602967137257         0.004911122223822116     0.4388359686308238       -0.012376572192837644    1.360557507404405
1.001604298902368         0.004194340167399049     0.40859000543684715      -0.05982778659648542     0.8231513777792017
0.9880330269620604        0.009071095109622677     0.535230073618421        -0.026787625953866797    1.3095559795120761
0.9875741297301134        0.009632029991282464     0.5426240001976396       -0.026482639596803758    1.2947951551440753
0.9855359296392198        0.010373998982772983     0.5577457062747023       -0.032239385835205296    1.267705732999926
0.9870071070239833        0.010270407731590549     0.5508151721406366       -0.026393406202959383    1.2806721072923055
0.9862948588071605        0.01066586297184959      0.5570683967464277       -0.027900507267173868    1.2689220007005948
0.984945748267521         0.010970974509762577     0.5648174260904186       -0.032171425612298105    1.2561663437379165
0.9834693866295512        0.011383109279934269     0.5736698777136633       -0.03610628176082816     1.2406595209741302
0.9844001336105095        0.011569978393261612     0.5714306560411214       -0.03195478064409129     1.2455590362920648
0.9886969636462687        0.00922689084492046      0.5338799984812392       -0.0228708406591977      1.3136688457915604
0.9893594635941122        0.00927600214025921      0.5317343686135758       -0.019453603552964497    1.3173583161036755
0.9950571249027744        0.0061701482100502796    0.46466558084827675      -2.896727408768424E-4    1.510476768157594
0.9899932785611876        0.00908262377476801      0.5271764227601309       -0.017114475413773676    1.3294459826579124
0.9907379740993024        0.008874870202021375     0.5220368035017239       -0.014219164519010006    1.3422759767754577
0.9916144443786159        0.008865551828806119     0.5191095245106695       -0.009983024944278602    1.3526352242148756
0.9946167423732727        0.006641794992647196     0.47530050150510844      -0.001408152802246927    1.4722428347511387
0.9941160357166379        0.007105490499674221     0.48520024348054197      -0.0027490251479590153   1.4418628685517636
0.9935987566814763        0.007574653397130392     0.49459595471343837      -0.004090859540737616    1.4124188200450438
0.9923371859563894        0.008332470664068968     0.5096894277243419       -0.00808230370389214     1.3695995923388524
0.9930445735433782        0.007997099164425744     0.5027468620985887       -0.0056457555591039365   1.3895907418208182
0.9960473614833361        0.005804938532759427     0.45469332234978727      0.0037685062282085302    1.547850001665909
0.9956908601824696        0.006331569978212965     0.4670749626943527       0.0028699231856994917    1.4989700669138386
0.9966910622189016        0.005865232207690583     0.45614553412317566      0.005512722730195988     1.5291611720911662
0.9973700827694701        0.005749261583593212     0.45438923792271446      0.005702534220848642     1.5147441078217925
0.9981251893520011        0.00568720987085348      0.45505008718687134      0.002831893296590917     1.483451511521139
1.0023961850695593        0.002589295552238744     0.318477310055386        -0.08320175210158685     0.1084173479556504
1.0023794605571643        0.002869047317387756     0.33597159902157164      -0.08202632511368341     0.23576596708565284
1.0024976900279463        0.003084107922179329     0.34766946891960404      -0.08109243143551347     0.34096356276822737
1.001977593895284         7.446508000041794E-6     0.14320050908435603      -0.0014780435230284722   -1.7391427235993666
1.002240481600612         2.944279624761543E-4     0.16552109789055192      -0.020643563027893743    -1.394270397297584
1.0027578277495297        0.002437244620172729     0.3091984422323509       -0.08147944681030221     0.03248448680442929
1.002745879031171         0.0020467488498932384    0.2844916464140707       -0.07865046695446115     -0.14635382408724698
1.002744779850232         0.0016335717236412664    0.2579226836057678       -0.07193284203296789     -0.3608378494660568
1.002365939509946         6.439979461271725E-4     0.18595195558258046      -0.04043737309994338     -1.1158078819259545
1.0025155901194276        9.38310685716179E-4      0.20823188060874617      -0.0528437525091329      -0.8292045860207168
1.0026244925123768        0.0012617763378474016    0.2312916387461681       -0.06362366265179288     -0.6324193167672777
1.0004734658683179        -5.388666882171609E-4    0.03270655895968575      0.039049079091806056     -6.220455704546914
1.0014118941235977        -1.4000254744714365E-4   0.09778277141539304      0.011537997075185498     -2.787970489937972
1.0017400173747273        -2.2824144818322148E-4   0.12735512738826052      0.01739091326467981      -2.084812510050216
1.0011931775061311        -3.3815199842070296E-4   0.08508906643421126      0.030371972472494995     -3.2192143257758095
1.0009633332817292        -5.107399746964596E-4    0.07674371153235066      0.04665385768783329      -3.688219080762686
1.0007300713024812        -6.633720777069218E-4    0.0732099507937959       0.059243876468958255     -4.1997710672809445
1.0005003985049872        -8.031162583977816E-4    0.07603068441150845      0.06772512469872506      -4.698443247425
0.9726479270056387        0.00699351622130686      0.6038284352684832       -0.08499223474807517     1.1916109122670102
0.979185307599788         0.011431990790436426     0.5911733826629698       -0.049961780360016965    1.2151157886801576
0.9780054027393699        0.010255142315538795     0.5905521796553203       -0.05819575238782692     1.2149508597521965
0.9783055069408153        0.01122000114267802      0.5936823842783895       -0.05332676795480155     1.2119359896579114
0.9723917568679341        0.008157885381627835     0.6077544879552973       -0.08030998036285926     1.1887750251218634
0.9743209120750903        0.008406423419496845     0.5999904895386826       -0.07532510158085876     1.1996680189770823
0.9751983282525316        0.008998295360780888     0.5979700049616766       -0.07073905864520941     1.2032140786224375
0.9761084465643916        0.009515817328747398     0.5957968089282327       -0.06630063738701364     1.206841024866604
0.9770445303630121        0.009932074191424037     0.5933402667564761       -0.062135559060931246    1.2107334701174948
0.9733021216528881        0.008891957205404956     0.6058500138462879       -0.07536919029347083     1.192314022349817
0.9800539516920703        0.011650069102032964     0.5888558016558002       -0.046482329946504024    1.219696450529942
0.9809459580719992        0.011778165725385106     0.5860827012095927       -0.04317931951993573     1.2233300681240291
0.9795056507957705        0.01215220178979871      0.5936362408553001       -0.04621960802864527     1.2120791159653161
0.9813179319540146        0.012429063843747033     0.5884909405531159       -0.03954487689743404     1.2203627353106528
0.9821112853007832        0.012709615483744075     0.5874039939385497       -0.035938438082001735    1.2215100634612008
0.982807235094135         0.012116062040286257     0.5811028350861073       -0.035683284149187755    1.2316640107120653
1.0024114635260482        0.00336899138271464      0.36352920504095304      -0.07880401603323027     0.4442594798367347
1.002273912356308         0.003733200585754603     0.3824615233693475       -0.07453118171752308     0.5684198733568371
1.0021073936692675        0.004120008917528945     0.40075162898621475      -0.06889383987651478     0.6863018293033596
1.0012077738929006        0.004475435081006594     0.4219831848916657       -0.04916382666080459     0.9559715662703013
1.000862888456004         0.0046725061723228364    0.43042132943277556      -0.040198877378109295    1.061300352932553
1.0001456898312648        0.004985263625301426     0.44157682732278997      -0.023378318737916796    1.2450138238319874
1.0006577539705948        0.005019529087579105     0.4416905208189493       -0.03430231934750933     1.1233218293756122
0.9986910855306265        0.0058053384363644595    0.4600317029021851       -0.00234985011473749     1.4222812860375154
0.999301703135357         0.005309059542035367     0.4492298336406954       -0.008374755102482393    1.3875975861096792
0.9990562745154264        0.005675278365261228     0.45797335733528444      -0.006173629784170679    1.3753560077392504
0.9998429005984668        0.005381484218841784     0.4522912024628681       -0.017644387547666892    1.284907626037456
1.0019716950693494        0.0044973716776058135    0.4164666785123351       -0.06336852864465566     0.7863704646302048
1.0016296801227382        0.004709627629460773     0.4267167541113917       -0.055896929128419426    0.8733875175538305
0.9882867935613989        0.009818938409984948     0.5415370050264322       -0.022440336544027436    1.299559102210317
0.9878048695225107        0.010453110096374604     0.5495183350709588       -0.022244511735348412    1.2851759212388794
0.9857114085269112        0.011196046229775457     0.5636720736545103       -0.028274922334389274    1.2589112467760215
0.9868616242603028        0.011034547810093755     0.5581927829743286       -0.02418685912193231     1.2700660119543725
0.9873959087273279        0.011004490497697859     0.5561178161225645       -0.022066698153631763    1.2721312983961424
0.9864318611032294        0.011352016105420795     0.5624312546960907       -0.02484117645268433     1.2588492172832575
0.9852397938827204        0.011780018835020237     0.5700024662631192       -0.028043893009423976    1.250146421230923
0.983816104955126         0.012249705088910165     0.5784334025878394       -0.03164716697258634     1.2349728296618183
0.9846904587083034        0.012253388916768944     0.575516164087249        -0.028486327053588084    1.2393497620997094
0.9890737316366818        0.009934349209957002     0.539848111403046        -0.018404791415647367    1.3021958609108262
0.98990653050376          0.009827182494171851     0.5359977871134932       -0.015006590744786835    1.3104698051628405
0.9952667514111618        0.006853584333803931     0.47840257103941203      0.0017864622812021839    1.459800804640251
0.9906169885490701        0.009649956485114016     0.5318157094818748       -0.012319694491985049    1.322006489366264
0.9911884837890126        0.009420798302095957     0.5274476172365905       -0.010418982527915068    1.3337795613047292
0.9917088037434136        0.009516796937624413     0.5274225392436256       -0.007941261922428677    1.3268397551877482
0.992306370009477         0.009189597460241224     0.5218154360686428       -0.006142366817416345    1.342546958754075
0.9947798651128491        0.0073621825205128395    0.48870833134961994      5.460603772988105E-4     1.428109362609901
0.9942386673217309        0.007854269140572228     0.49810825430345895      -8.481048046072641E-4    1.4010498119512087
0.9936495298811101        0.008338121497341679     0.50688132732536         -0.002389863653118294    1.3768643346464298
0.9929861368077738        0.008766896858081071     0.5145067688024613       -0.0042351296981113186   1.359035013392301
0.9963695242284977        0.0064506647930025396    0.46972444272757846      0.00458870112101722      1.4797854286924335
0.995964724683062         0.007030560012506328     0.48189558696271556      0.0036208696209987837    1.4404321074375985
0.997103304514436         0.00648447246735139      0.4715998922299342       0.004406254188753793     1.45651824132348
0.9978619613243317        0.0063821247789396995    0.47125538991988575      0.002038968128870712     1.4253548917400403
0.9985173247845154        0.006259964156386062     0.47052117093741436      -0.0022077478588905966   1.3869080210393958
1.0027209319121049        0.0028457665094228815    0.33347157499395313      -0.08213715015721666     0.20456932053686522
1.0027813307629           0.0032620119432827726    0.35586077244921416      -0.08086301954926418     0.35827042440413454
1.0031541810071023        0.002667508631180988     0.3241767193396687       -0.07990003501038268     0.14419039961704708
1.0020902647524934        -3.2924088462941915E-4   0.1558395120601248       0.022322968724266614     -1.5257655921941373
1.0023658790972452        -9.456282018177309E-5    0.17036710277584743      0.005306288810659281     -1.27143635508467
1.0026231343864942        1.2794788238956593E-4    0.1870487297344794       -0.008463495713770183    -1.0366555819085141
1.0025765852921482        4.281428995414285E-4     0.18977290580567374      -0.02629185239574524     -1.0551271632848975
1.003131857697382         0.002243627031021595     0.3006088886389027       -0.07686345004724117     -0.017117517945866065
1.0029234076127296        0.0013522264112838499    0.24586068515972775      -0.06176420573507244     -0.46423492884886797
1.003084133051234         0.0018545826980063801    0.2779591624880098       -0.07176327298311184     -0.17852290854209688
1.0030784218205662        0.0015503456758020676    0.2610412259063732       -0.06509162864118208     -0.3100885027381847
1.0027439947084391        6.83918505128783E-4      0.2070578346691021       -0.03797772558164575     -0.829693588991466
1.0029426037160023        0.0010261058020912743    0.2301568965355529       -0.05033465496278618     -0.5922342867215479
1.0002901590338007        -9.424928266802668E-4    0.10106579203902123      0.06939558321233975      -6.314463013331639
1.001507391538389         -4.446430450281836E-4    0.11757262080380483      0.03659854408029594      -2.396366108192069
1.0018354346029743        -5.416252893375254E-4    0.1469793096693237       0.03960594575382129      -1.7798086515758265
1.0012611237972981        -6.36743745716872E-4     0.11299624975228639      0.05459020993088624      -2.6215832059951967
1.001002419408509         -7.974276115119642E-4    0.1129449258104485       0.06910147061353801      -2.892828019831404
1.0007499003355504        -9.366064327295974E-4    0.12059046367987998      0.07906018836789147      -3.0371530635018327
1.0005134543121899        -0.0010549076356118265   0.1390283564044773       0.08114741054211096      -2.6298371220884076
0.9846441426408598        -0.00360324876270025     0.5194783826541586       0.07949659895328996      1.3074647205882544
0.9843768582718878        -0.0036459237997639687   0.5218374299785352       0.07995360801796099      1.3028512530426688
0.9841090353987029        -0.0036893958520084844   0.5241653389128712       0.0803973470977989       1.2982091643542242
0.9714975095805745        0.007349986727349053     0.6097244150725358       -0.08536402951991064     1.1852469970245465
0.9786895052728792        0.01213953944561478      0.5966293244386088       -0.04865809872677047     1.2084767124239002
0.9712285905227844        0.008594275952371019     0.6136952264788045       -0.08061771526721252     1.1814265616430875
0.9772853660970723        0.01096679842862721      0.5966653103133503       -0.05716727986671744     1.2073145301809751
0.9776440349374095        0.012014424457982424     0.5999492750113253       -0.05208964406840411     1.2041564311849295
0.97220585088836          0.009376049819095187     0.6117710334733398       -0.07559419823572798     1.1851486915954397
0.9742379874974884        0.00956311936460199      0.6039559866088302       -0.07050676579138389     1.1957605462092677
0.9752195822628914        0.01015144449091003      0.601886454792382        -0.06576557980433191     1.198998541850757
0.9762427060797044        0.010618684041267624     0.5994572988836699       -0.061311982189105226    1.2029803789212303
0.9731824563062151        0.010112932005587058     0.6100306193637556       -0.07059204166880106     1.188240675952984
0.9803953427958472        0.01258236135033135      0.5926977031639565       -0.041907445933825734    1.2150743891499032
0.9793316994481923        0.01297016388412235      0.5985501908775389       -0.043778160741831475    1.2067994277656233
0.9812887468551829        0.013228451167391853     0.5933678674331214       -0.036862138810168456    1.2144637400563105
0.9821754510478045        0.013456310705620585     0.5919317645711402       -0.033285959133938524    1.217828552362907
0.9831347153267834        0.013097364875420686     0.5865543169352866       -0.031215655268962476    1.2250497750190419
1.002708106606515         0.0036753552166348576    0.37634298064141397      -0.07829276737254963     0.4804833963605452
1.0025778986349967        0.004092800846055691     0.3955133341178998       -0.07429043460987807     0.5998020870446082
1.002398500837343         0.004517610816053486     0.413597034429237        -0.06897179151301736     0.7049146728967305
1.0011939521991922        0.0049893300623719255    0.4385081009645697       -0.04564345552451832     0.9980717910078762
1.0003868714689164        0.0054145949022167085    0.453099304175026        -0.027902658225405764    1.174361251835019
1.0009084357634603        0.005419850790086095     0.45193298340363114      -0.038017320805146214    1.07293478909053
0.9990565477042639        0.0061284775245088515    0.4690634085241339       -0.007468069435485514    1.3358465791567948
0.999531529335064         0.005857696830348468     0.4638152011336553       -0.013233634697964666    1.2981610858245316
1.000122829800571         0.0058289989175147475    0.46365630661293816      -0.02279503087146634     1.2091231133100477
1.0021234265208567        0.004959051379009384     0.43112306239897524      -0.06190797192713583     0.8168065010063765
1.0016769341517637        0.005142237409371869     0.43993615883519716      -0.05360452393827956     0.910544568365107
0.9885558203029888        0.010671642607991895     0.5491600530957271       -0.018288537406701694    1.2846986483589242
0.9880097250541775        0.011321489597905103     0.5571728555055233       -0.018600645529001588    1.2696736310354864
0.9861776846102583        0.011973183955414319     0.5684872535214307       -0.02383304966582187     1.2515164046611824
0.987166660989482         0.01188106305286048      0.5647541277387029       -0.020270309064289675    1.2583437477267856
0.9855116479303135        0.012719186398453878     0.5765854081809904       -0.024069401158493098    1.2386055879285627
0.9843946948162561        0.01307831052988399      0.5825531320638945       -0.026975082314396038    1.230756141257418
0.9905137276164379        0.010395182920990344     0.5408279279488801       -0.010894781029373983    1.302501911529314
0.9896368182115629        0.010785438762413658     0.547300477199498        -0.013462647434805412    1.2888118894097593
0.9954903355960933        0.007590598997573712     0.49270184028603375      0.0025896808154813114    1.4090527267944488
0.9913047213955396        0.010109422377453584     0.5357065133827333       -0.008310582862866971    1.3130245997575989
0.9910853963415158        0.010799436015158132     0.5444291406302052       -0.007909500784539187    1.2927254008778353
0.9921341314845216        0.009989139189280394     0.5328095192980485       -0.005446839700303575    1.313868164201747
0.9929433039400405        0.009631741712744724     0.5269785208882843       -0.00319290956706064     1.3288748866108457
0.994950694150606         0.008135255884519469     0.502494023658005        0.0014432380793842389    1.3832439944890103
0.9943493024271026        0.008670670551243953     0.5115613095097179       1.3163888731104265E-4    1.3611947877532076
0.9936804732670792        0.009172158943597462     0.5196907190807024       -0.0013951936322274948   1.3434346812277955
0.9967127524153121        0.0071843032379210175    0.48596136059978484      0.0036229429669088933    1.4095747520156436
0.9962560177025742        0.007781896163338953     0.4969682673636678       0.002992492762889189     1.3828560145948785
0.9976400948798371        0.0072011812724027905    0.48846327705821985      9.124469301926401E-4     1.3720895890239877
0.9984198907932318        0.006900933118199731     0.48435666949170514      -0.003277841631518377    1.3464104444099332
0.99903342190176          0.006684957039342781     0.48141471059397195      -0.008595394507174746    1.3013980911522633
1.0031770479285567        0.0031171807996104636    0.3476229433537324       -0.08066930079334822     0.2921083627954351
1.0031452257517164        0.0035725024735637927    0.36938556614748946      -0.07994486240444033     0.4065729481022786
1.0035521220990737        0.002449256770892685     0.31591097384375927      -0.0749850735912574      0.09905839217222402
1.0035906486458763        0.0029083097232776296    0.33847303515260174      -0.07815986551145863     0.2303999478370576
1.001917753981427         -7.985636820390482E-4    0.16841136428362458      0.054005710964118235     -1.4730398725663285
1.0021521880251893        -6.663541720819254E-4    0.17345610362930855      0.04298701638743906      -1.28979710143909
1.002470475519541         -4.521080859921111E-4    0.1833806944812144       0.026719007831986257     -1.1170894372466347
1.0028116358063157        -2.060581469179395E-4    0.1980012017722649       0.010580879277942936     -0.9092469475096355
1.0030452981456432        9.350424545226958E-5     0.21004320067558968      -0.005790877585167644    -0.7260728891959546
1.002909459589786         3.905423640330523E-4     0.2068096858856563       -0.021756942700140596    -0.760056629616164
1.0035025487582951        0.002004974217827474     0.2932661385065027       -0.06941153043054875     -0.051707095647863965
1.0032376531169507        0.001295167835894834     0.2528432250655397       -0.055847976551209676    -0.38973396025179813
1.0034050562316001        0.0016147624594226116    0.2724150086207408       -0.06249637101217264     -0.18094617676266475
1.0031558638212263        6.789092854060202E-4     0.2258446008637067       -0.03337912880087112     -0.5720704529301196
1.0033983331959737        9.764625685486104E-4     0.24542616247192048      -0.04290045007123521     -0.40936340595142623
0.9849124015584328        -0.003561676599854066    0.5170760083360896       0.07901836220102869      1.3121420960928596
0.9854512136347965        -0.003468401792875034    0.5120900509729052       0.07811282738066962      1.3216019262073138
0.985184524409549         -0.003519284420456658    0.5145964768373671       0.07852414036061918      1.316698962764635
1.0003461744537667        -0.0011506672041213576   0.16896270000380023      0.07165310182640211      -0.8151923319607832
1.000134165001798         -0.0011313156940964404   0.17573194064923991      0.04594282944552724      1.4963540423411243
1.0016056914353675        -7.82589535945779E-4     0.14887585609387474      0.05884956639180673      -1.9201754059623686
1.0012973591255718        -9.474933866384839E-4    0.14909482193307935      0.07332802858882793      -2.029293587179327
1.00101590359226          -0.0010902075687806655   0.15765442762332824      0.08315011626817632      -2.0072163785079957
1.0007469935647373        -0.0012090766752250333   0.17446969507642227      0.08535798774648524      -1.696168156974286
1.00051305650452          -0.0012922898831913567   0.19550408873613132      0.07688910430698694      -0.7799178884951278
1.0018283100037415        -9.942775801408809E-4    0.17926159789387378      0.06557560810073776      -1.3475832185285754
0.9848103044274268        -0.0038270385467465014   0.5188760270561835       0.07710571979735992      1.309708346521714
0.9845461577550739        -0.003869089606014505    0.5212167526776702       0.07759712233917003      1.304976336129571
0.9838402729032989        -0.003732949427303546    0.5264640686668091       0.08083539456504095      1.2936637354012108
0.9842806904273226        -0.003913005551796506    0.5235378903359377       0.07806915876661702      1.300451770556837
0.9840135633930412        -0.003956328023334967    0.5258323819873288       0.07854144656707794      1.2958280846113401
0.9835711500736671        -0.003776603783770147    0.5287298805120221       0.08126538657382552      1.289042250591866
0.970258122612877         0.007723771004339291     0.6156772961708822       -0.08579668399736333     1.1788276251483107
0.9781701626910364        0.013049435453639156     0.6029830340718713       -0.04688290959777392     1.2018563982117065
0.9710603688912269        0.009879176871557377     0.6176687839688159       -0.0758563241395524      1.177901861367859
0.9699644362682288        0.009074996619468539     0.6198324793957303       -0.08095973456458076     1.1744849348144626
0.9765100262552561        0.01177334941891379      0.6031660239963069       -0.056077878441491265    1.1998037277094757
0.9769276547721858        0.012943580579224888     0.6067880501307625       -0.05069248917645643     1.1962392537909319
0.9720712314417127        0.010619292636325934     0.6159163989095334       -0.07099550669826772     1.1814048379144337
0.9711097953884653        0.01092484711764218      0.6203985144251569       -0.07185086307543546     1.1752490430115108
0.9742080036384883        0.010829977628375677     0.6083630491435345       -0.06544465191903924     1.1914791855144067
0.9753339942253328        0.011400666920786675     0.6061284328544144       -0.06051045434589788     1.1945832568109862
0.9730718599590761        0.011409384913243623     0.6146900763052713       -0.06584800822092655     1.182759718600064
0.9789080877161122        0.01402925605283442      0.6055024510321423       -0.041542233644578215    1.1992526277067492
0.9803234607537           0.013868413939841425     0.6002057065985268       -0.03782147963613545     1.2056135676825346
0.9816215782495386        0.014124038687243759     0.5977926698928561       -0.033031870187175405    1.2094472778881669
0.9827192771315871        0.014117959706985492     0.5946327473671175       -0.02956594311961783     1.2131500900766043
0.9839189493216584        0.01395356581106053      0.5902204422794646       -0.02612485267258038     1.2201640817305306
1.0030613044802823        0.00402569096456596      0.3894367069557209       -0.07762806358855408     0.5398411695144757
1.0034833059669428        0.0038990720354494337    0.3824261613881524       -0.07886785422728622     0.4816288459182402
1.00292690985104          0.004495799983076207     0.4087219692196375       -0.07399668927470081     0.6354118134859598
1.0027127797041193        0.004955074144066441     0.4264164749785662       -0.06892611505297618     0.7314252965746156
1.0024788925625348        0.005353836462274172     0.44064045532386886      -0.06347074329493312     0.801489289587731
1.0014164835127208        0.00548977824080179      0.4514394366695725       -0.04706925486712418     0.9782945027978897
1.0006570572163354        0.005852546167959246     0.4636291612736536       -0.032144429957718275    1.119430113885007
1.0011295524495707        0.005807827755533448     0.4610274344910307       -0.040560051913837276    1.0415275085187394
0.9995464176109098        0.00648925074757419      0.4782044820196707       -0.014537894621910602    1.2654660619503995
0.9999572164252017        0.0062499005192837125    0.473327879788145        -0.020237811548099536    1.216746740664173
1.000441593755646         0.006281684675643012     0.47391474142055917      -0.02781239615747858     1.1522771958395437
0.9995527403142912        0.00695875194427564      0.48796052029393666      -0.015232526844136469    1.232935296854806
1.002006308670245         0.005566486705926317     0.4501199028446291       -0.05591754128007032     0.8941231235953814
0.9889077314699656        0.011588556893716469     0.5574248953670925       -0.014373683871255755    1.2713745398413432
0.98822735931279          0.012330074438789307     0.5661768839748827       -0.015181391429752514    1.2565072183045205
0.9866767552838265        0.012894796124017109     0.5748928244929897       -0.01940007619874361     1.2433162685564645
0.9860066032663941        0.013412435259393665     0.5807437301297464       -0.020493567232024307    1.2325859529931362
0.9875557295425241        0.013142158013473149     0.5750170939454281       -0.015786346689850104    1.23956133062031
0.9852189724813978        0.013919937466792367     0.5866508683694409       -0.02188659516049477     1.2240122800072994
0.9845098984839357        0.014652616552882258     0.5937556795514147       -0.02247148790727654     1.2155214064832334
0.9905319012336466        0.011199653094477397     0.5499448814301725       -0.0091827415957667      1.2847359999617354
0.9912112021137987        0.011368166338375636     0.5508369350121789       -0.0066756528128         1.2822076740080117
0.9898929630356518        0.011825862989952233     0.5578505068058082       -0.010324390003762151    1.268904343235796
0.9957240495784658        0.008385171398637382     0.5072247025477844       0.0022904203490731914    1.3591723029368088
0.9918654293481571        0.010924755344493706     0.5448527002627825       -0.005129753116392222    1.2911900841599355
0.9928513762084865        0.010576474727728827     0.5397269452087369       -0.0027075239874019504   1.2970372535050154
0.993701335862904         0.010096183097539353     0.5329829345234639       -9.63432368673111E-4     1.310360663675417
0.9951231050190165        0.008983571188440249     0.5167046505146725       0.0014309436188509163    1.3394995852756646
0.9944514079864247        0.009556427524260397     0.5252563645041902       3.6813952920153233E-4    1.3236073733441869
0.9970866251077974        0.00792074912758527      0.5010836516292613       0.00126414909096296      1.3475330390762001
0.9965557987444911        0.008593520244522207     0.5119958377690764       0.001288919879036244     1.3278581379827805
0.9983660778701013        0.0075261589354242275    0.4966735384028942       -0.00448832169571718     1.302261552947871
0.9979253418308502        0.00802549625689149      0.5049554218043132       -0.0027100505987350445   1.3047098383635867
0.9990926974646369        0.007390414061535631     0.49574718451340466      -0.010666081527774127    1.253767942397978
1.0039477228442422        0.002196037876627789     0.30948206913324366      -0.06757084406583815     0.08155700483831664
1.0036727345729337        0.0034443764295336832    0.3630687129355405       -0.07917293883242947     0.38188532877812215
1.0039930283628402        0.0026727243897353794    0.3307100227032311       -0.07321838000090937     0.20367463837421804
1.0039990564477141        0.0030957459988908242    0.34895437156797016      -0.0763455538246388      0.30097944614979516
1.004020140461618         0.00402015613709817      0.3862598420712154       -0.07828080986401653     0.4707943308353738
1.002167145839863         -0.0010079718326891306   0.19513434749761643      0.06016614266288007      -1.053759459674856
1.0025767685770757        -8.31873527415416E-4     0.2039349847433996       0.045732656908990026     -0.8908291699889341
1.002866625716169         -5.714403767706522E-4    0.20821607839266018      0.029623195249791446     -0.7830146397823281
1.003175529748484         -1.4400003304424567E-4   0.21664290341573453      0.006099499231130476     -0.6602025595632548
1.0031345535773113        -4.017076928016337E-4    0.2177091483755044       0.01902892728715846      -0.6530832809394066
1.0034246999508682        3.9497860269651845E-5    0.22824892563736823      -0.0028026824112372217   -0.5197006705139405
1.003327439426312         3.532481145685528E-4     0.22649343229080385      -0.017425199881279965    -0.5356463527107028
1.0038965579949015        0.0016714834277341062    0.2864847252824069       -0.05796029031073256     -0.0582963493736044
1.0036549597050173        0.0013149302728478651    0.2664915956028393       -0.05122175966471778     -0.20506749811041777
1.0036133789907098        6.432107642032834E-4     0.2440786839815101       -0.02808718531158413     -0.37664313018303014
1.0037710318958113        9.589384437130475E-4     0.2581492333895895       -0.03850314315310983     -0.24618212172806872
0.9857193930375576        -0.003439081901677487    0.5096012623091503       0.07749793773553125      1.3261199541546542
0.985595397774763         -0.003637938395215921    0.5114424999220731       0.07614399074979149      1.32292576473041
0.9850784974675781        -0.0037873310445829915   0.5164716011136852       0.07656968396029383      1.3145522917086738
0.985369628432319         -0.003748967721335592    0.5138302561558103       0.07593190101827706      1.3186765332873767
0.9855965657241933        -0.0038311471668276624   0.5121822788730295       0.07444310928575225      1.3235439405213598
1.0002825240035091        -0.001334937481251513    0.21318213921187137      0.056290359677427015     0.5582888885256394
1.0000192836573194        -0.0014089087918337019   0.235214634942506        0.017690736949903516     2.6559374686570982
1.0015942133756401        -0.0011164810151369769   0.1808302023851512       0.07523179054829622      -1.4187488949115143
1.0013066207957426        -0.0012645621480077704   0.1898494305818126       0.08408542407730685      -1.358626893648543
1.0010132213675151        -0.0013919795762889664   0.20500033283977961      0.08686686045457698      -1.101946102119154
1.0007320990427178        -0.001491157248433093    0.22443006708247806      0.08050471541294633      -0.544572106399016
1.0004663930213318        -0.0015513743207144837   0.24228487751887504      0.06425006226685205      0.29831954320750326
1.0019091083073373        -0.0012626850543283469   0.20565067506295484      0.0745209034034523       -1.0013265731428953
0.9849661577919537        -0.004050412256001487    0.5184301666294412       0.07473073842499307      1.3118855471528603
0.9847134246938336        -0.004093159822217568    0.5206860777211997       0.0752190823244414       1.307143404831466
0.984450639754373         -0.004136279807605592    0.522990632223819        0.0757265224141998       1.3021426234829034
0.9837438673171578        -0.003998891276489091    0.5281101598235188       0.07901863406693997      1.2913791192824124
0.9841871256187048        -0.004185760814086086    0.5252882298812795       0.07617794160530843      1.2986000103748638
0.9839202011014254        -0.004221019218619346    0.5275245460455649       0.07673996591870129      1.2932175360544393
0.9834733762820983        -0.004042280875729433    0.5303609087786653       0.07948185351164327      1.2868028788341814
0.9833036961537179        -0.0038211217864390842   0.5309509377942104       0.08167583695588115      1.2844079761403204
0.968918587069785         0.00811724664825831      0.6217676212343282       -0.08639993029821548     1.1711582028345389
0.977555767703198         0.014206763072420222     0.6106562510895189       -0.04478610104546831     1.1921312405859972
0.9784712138624083        0.014941929128463437     0.6116005577704103       -0.04003649685240467     1.1921757242702087
0.9686565433244206        0.00960766801311533      0.6259680516127496       -0.08124493081876322     1.1668488056363648
0.9699261712574145        0.010627535953965353     0.6238776451479852       -0.07524057056084775     1.17108815275414
0.9756549489847862        0.012707631441359897     0.6102355120502584       -0.05490278229837132     1.1916935246699072
0.9761586768485453        0.013955597601363494     0.6139249835859352       -0.04937206132816258     1.1874554947194722
0.9706406279580981        0.011687943047552269     0.6243189293202612       -0.07007127853707919     1.1720022206111576
0.9718126455812828        0.0119372642756056       0.6209740601747183       -0.06672113245688176     1.1760413891881616
0.9742075728556321        0.012355197647388542     0.6139465833051706       -0.05974442966302253     1.185891788233423
0.9729267117087315        0.01257994840617425      0.6192704449109661       -0.06199957274767685     1.1796200533864476
0.9797117759223203        0.015144521009464784     0.6091729688734088       -0.035887492731646535    1.195704874975916
0.9810078599334631        0.015000222423309856     0.6047847762592684       -0.03247296889823312     1.2008471611764706
0.9823505623372973        0.015005944446240682     0.6013354328373741       -0.02836039460387074     1.2040175331116136
0.9835361280213817        0.014855183703467393     0.5974581613432132       -0.025069882271166553    1.2110431379387168
1.003526692240491         0.004417905641360673     0.402457665342551        -0.07719248423476772     0.577451253289153
1.0040552242887422        0.004529054491571519     0.404691425658828        -0.07722858749010146     0.5753815537958316
1.0044307185268782        0.004388420594787147     0.39922639058537024      -0.07706343182897646     0.5310902907156319
1.002536962868467         0.0057702461271447545    0.45220609298008013      -0.06133663457062144     0.8466586593633483
1.003284931503915         0.0049652000260691324    0.42294791999907316      -0.07319746963532593     0.6756422712092119
1.0030149807553996        0.005518321818865946     0.44200324414189845      -0.06781597400774096     0.7595176637085095
1.0015789951423135        0.0059995985053209406    0.4638196937409736       -0.0470647599336346      0.973189795260553
1.0010551032676833        0.006284953435926572     0.4727054577402909       -0.037673377093621       1.057709288712366
1.00014371136806          0.006791871142177807     0.48498595192981064      -0.023038253903825818    1.169903827433103
1.000713644456025         0.006681837870995985     0.48208533786419616      -0.031404803061274654    1.108029255078514
0.9999307980066745        0.007455217574729956     0.49782193450569334      -0.020224915607123986    1.176883513400275
1.0022324358779575        0.006250643863055199     0.4665321926173388       -0.05489026174365813     0.9103367194672674
0.9892161506619402        0.012617390333474643     0.567031596229019        -0.011242467514940636    1.2536266896687687
0.9885097372880324        0.013432639768375991     0.5758915431577548       -0.012172559754879702    1.2387830638565946
0.9865371184114767        0.014156997914106208     0.5856581089480396       -0.01709756264610562     1.2251132757275742
0.9877415407300559        0.014288305412107195     0.5846576084269435       -0.013181754271289913    1.226203596966199
0.9843527001627863        0.015395207724924845     0.5993778335081844       -0.02138182768433312     1.2074298916811887
0.9855227390869417        0.01513918066018744      0.5952566284425588       -0.018333766250704934    1.2118956794344993
0.99083065670548          0.012008841669944112     0.5584624356987388       -0.007065478076463357    1.2656829523633553
0.991725455016097         0.011891076716427324     0.5564040161391687       -0.0047593792504072715   1.2658558352296172
0.9902333252816669        0.01282851078204777      0.5677534527376155       -0.007876278935241817    1.2499756173113659
0.9959628721339658        0.009266401595181469     0.5220756664206317       0.0011068289034652874    1.3109166164150894
0.9927369509383122        0.011750626411724563     0.5543112788918342       -0.002511662432032838    1.2686177114585855
0.9921993428910602        0.012570606923255035     0.563731722139496        -0.00342815130191258     1.253457489701627
0.9937234355810084        0.011128336425050166     0.5466924790585129       -0.0010017083983677344   1.2765554287827106
0.9945525588266594        0.010527356229233792     0.5391334850823059       3.495079522020479E-5     1.2875417673313645
0.9952942970448716        0.009909911671346585     0.5310178411692371       7.095386812435339E-4     1.2988378236964542
0.9974293784933942        0.008748391455920318     0.5163037685900577       -0.00179042474188271     1.2895633120454943
0.9968697807128256        0.009505736512878478     0.5272681875744306       -0.0011736672725069647   1.2760863716421609
0.9987517868795383        0.008115854960506935     0.5082614271411351       -0.008827047315784252    1.2474610331988971
0.998317295995137         0.008825995059180998     0.5193429833293001       -0.006868290053225795    1.2463102677873026
0.9995940701366394        0.008091758563625477     0.5090129190951229       -0.01683389015244728     1.1903555244516328
1.0043541878749158        0.001946030033633147     0.3069296785441416       -0.058792020670608285    0.07970678514284074
1.0043358936847622        0.0015434899609787862    0.29289576782669263      -0.04988085240463821     0.02295455642636845
1.0044278566907034        0.0024300196185857307    0.3261156501588895       -0.06624620212809242     0.18984968620663525
1.0042940470004729        0.0034973731956379006    0.36651917131768097      -0.0763663827618206      0.38809998449566835
1.0044466051039649        0.0029547473565849276    0.34645249432078723      -0.07203626302742605     0.2975071359497585
1.0046787545970082        0.003964287175419471     0.3848517979397257       -0.07598689736406063     0.47260652654876584
1.0022800510209733        -0.0013932943122819854   0.22753546662556276      0.07191802557108716      -0.6863020263048228
1.0025299480712562        -0.0011537871748602902   0.21944391613605996      0.0600403523724959       -0.7590722672985007
1.0028800311950345        -0.0011306516546646277   0.2310306384962925       0.05380510449722616      -0.591483538530421
1.0029706958876257        -8.434157261266201E-4    0.22220960246702978      0.04096921592929642      -0.6516056606743739
1.0032356451065945        -6.941235489957212E-4    0.22877693693022458      0.03163490818958328      -0.555586267094278
1.003464682777669         -2.4280978954444938E-4   0.23104856144567223      0.010104509204076753     -0.4621575501941117
1.0034694630187047        -5.029412066098186E-4    0.2347456142184865       0.0214851101447923       -0.46608651589825323
1.003743830332269         -7.781353450780613E-5    0.24226086116189008      0.002527783604439191     -0.37314945525101173
1.00381593605964          2.738241680470391E-4     0.24664477792052852      -0.012036965216371874    -0.3244636846428636
1.0041297768301867        0.0011646272264526272    0.27539856419820047      -0.04167533760465802     -0.11584728224006212
1.004058621347659         6.954994962914919E-4     0.2619345239458423       -0.026887149761104494    -0.18911266889031328
0.9860204504263267        -0.0034466875137253872   0.5069068149861929       0.07641443900626477      1.3310916335155765
0.98583826517445          -0.003730389426064336    0.5096421243583552       0.07448618385379173      1.3282379521963856
0.9852211472123694        -0.004031960081923619    0.516214093995189        0.07401525474140223      1.3156798933312421
0.9854674093013354        -0.00403413186360852     0.514124526103365        0.0731378518669451       1.3208209207382515
0.9857268997793763        -0.004023837778514423    0.5118373623134671       0.07229633365222286      1.3243419432743073
0.999740705238808         -0.0014087032833925755   0.22741658768143572      -0.010585234878891894    4.723163075913626
1.0002190837250977        -0.001599010882447141    0.2570596238281555       0.03989249291936147      1.493679299381484
0.999866192783921         -0.0016041138551709671   0.25842895196174537      0.004246824050206377     2.970119970184627
1.0000242547548852        -0.001664902201459781    0.2663898845462072       0.01883374215904356      2.3547972160868564
1.0016187024392131        -0.0014501010806102592   0.21730667678740004      0.08352465779443019      -0.9155168154503645
1.0013048569082004        -0.0016050364340886752   0.23282760074753348      0.08684136638936825      -0.7050190753725922
1.0009878064162372        -0.0017190574664221613   0.2503613594725674       0.08241908350142614      -0.3184747844634716
1.0006833070431336        -0.0017934811198075595   0.2670721849829661       0.069709567192046        0.24027457727072019
1.0004022656241036        -0.0018408721769671195   0.28027345910891194      0.05035402083594941      0.9724717095912484
0.9994535947738078        -0.001475409859219761    0.2357949780812085       -0.01356972873309503     4.496309749995766
1.0019673199973371        -0.0016222568182230072   0.2394963567222271       0.08175513206328332      -0.603811260459784
0.9850967688799213        -0.004246082769838468    0.5181505779991881       0.07265618182159524      1.3131816954391498
0.9848766139986452        -0.004316928578871005    0.5202614308974428       0.07283742357399824      1.3092862516103763
0.9846183309646688        -0.0043788637577804115   0.5226138848909359       0.07321734407564212      1.3048183384518113
0.9843577038881225        -0.004379721989192108    0.5246957919630588       0.07408384633677066      1.3001551955201922
0.9836448255880866        -0.004266514452027395    0.5298318230127083       0.07723926587729639      1.2895031761197246
0.9833655974653328        -0.004311535895501835    0.5321315619823062       0.07773968692690608      1.2845632593532235
0.9840996345870139        -0.004509136227007121    0.5272502266043163       0.07391796734933136      1.2955748082351504
0.9838134878870468        -0.0044680765833472295   0.5292990845058415       0.07516126476725583      1.2912693242385072
0.9832112676274236        -0.0040812500863940775   0.532500789929196        0.07994473004475534      1.2820249364780791
0.9831273557535054        -0.004302829648185524    0.5338978621505431       0.07851489686128073      1.2804587480263916
0.9830381902283644        -0.003871845839274153    0.5331438161868108       0.0820272301501833       1.279787870696593
0.967494152227617         0.00855556076033127      0.6279966730288679       -0.08699586312150132     1.1629727923395732
0.967184124853799         0.010131628936984256     0.6323957085653293       -0.08186110951325441     1.1589706119793097
0.9786574906928348        0.01589080149578959      0.6160175576201193       -0.03689864389492861     1.1867824975377719
0.9776958715070647        0.015337688000968663     0.6158156116814465       -0.04106427751039243     1.1855824652253724
0.9765650687317688        0.015189388291505044     0.6183121610099861       -0.044494277268545594    1.1829424528043786
0.9684539350097964        0.011141091858621659     0.6304127185774129       -0.07616621956353337     1.1635771510773205
0.9695974919616646        0.012077028149800103     0.6290465477518675       -0.0708065274581902      1.1658631759580247
0.9748167171277116        0.013829317044052129     0.6177352301256932       -0.05323081490231666     1.1831889900836774
0.9754786553463877        0.014873742381839833     0.6200902549118729       -0.04829615389126122     1.1801906710762353
0.9707904390150524        0.012885385726223934     0.6275108702151176       -0.0656729654232867      1.1694127955112592
0.9720828755958443        0.013452204297859635     0.6251668770899471       -0.060997703406599546    1.1726788288793164
0.9734595693824651        0.013751676203928712     0.6218181399194657       -0.05681059203209198     1.1768204204874573
5.828648033734189         1.778565307603634        1.011421191813678        -1.3761860121521544E-4   1.000020891971724
5.748697325538366         1.8274921193030147       1.0090535549784951       -9.355983273750078E-5    1.0000406700775342
0.9798882686454533        0.016414025326811986     0.6157658474632023       -0.032146367986266404    1.1870240930984393
0.9788430104504016        0.017092697138288527     0.6218656228268507       -0.03344277703453055     1.1807695588943998
0.9807271975437072        0.01586710643072015      0.6106373462132958       -0.03107424261444889     1.1942676723647783
0.9818654695464697        0.01595743816259113      0.6084820136556807       -0.027547053386735184    1.195891997434755
0.9833618380526905        0.0159969689252965       0.605503095128988        -0.023062195603788777    1.199092782435477
1.003870821291671         0.004955059343579261     0.4196436006636823       -0.07565638184585564     0.6359232398278482
1.0049730376607022        0.0045634284187329776    0.40507313906944364      -0.07598842873879445     0.5494477361497262
1.0044280772472358        0.004863369238512033     0.41493714707106205      -0.0765467606544241      0.6060891964534504
1.002933200283658         0.00615124639311846      0.4599525922893113       -0.0631236041081261      0.831098401494292
1.0036776499101367        0.0054744073916465       0.43674971302003035      -0.07251856623931992     0.7110894857955024
1.0034804484549682        0.005958242187742152     0.4516045328049706       -0.06866478353249453     0.7759783202474831
1.0016227568137623        0.006579899803851502     0.4771905649842809       -0.045085529590774776    1.0006493584076388
1.0011530415063492        0.006812075366777766     0.4837832763843942       -0.03753809412447393     1.0553057541079127
1.000745659477979         0.007275632803799573     0.49400917140240613      -0.030912629631256655    1.104217254961419
1.0004027913158238        0.007986561623986019     0.5072856080440388       -0.025828163933427514    1.1287605481829373
1.0021080192438545        0.0068521399307482165    0.48099358463573055      -0.05022413123091561     0.9514501595771427
1.002748108431074         0.006781463937653292     0.47623011323911396      -0.05777591645927228     0.8888581096195945
0.9895258419749036        0.013698993195839377     0.5770456097450185       -0.008882541925897143    1.2361405970357124
0.988791820914315         0.014519035840406083     0.5853293169053736       -0.009957652075704567    1.224307780031797
0.9869720275122906        0.01525210364489914      0.5937364873267968       -0.013963419374141849    1.2149084527832106
0.988026985020342         0.015235702218203548     0.5922954242596645       -0.011181899673949974    1.2147616665089895
0.9848214721618891        0.016305201850600415     0.6049682208177356       -0.01833983347530234     1.1999054085811869
0.9862469833788986        0.016292197242279736     0.6027659216846756       -0.014492854778334409    1.2010254420829085
0.9913465339937899        0.012947327736386826     0.5681167480282366       -0.004991628323915336    1.2472307948701247
0.9905922530393182        0.013936171916927665     0.5784763711244308       -0.00611644988605778     1.2313986893492428
0.9922126528827768        0.013349806870252843     0.5720902799654592       -0.0033405775346776246   1.2355964525643224
0.9929751216243256        0.012914196881483618     0.5676111966087977       -0.002325009199801466    1.2362776920590333
0.9962046867399668        0.01023612966884468      0.5368711765653115       -6.689878282900444E-4    1.2685116774494825
0.9938183691197929        0.012249213946640285     0.5604198953893366       -0.001355798702830924    1.2479548433776417
0.9946743311185483        0.01158050283485308      0.552951785864466        -7.391215235976052E-4    1.2537249533621095
0.9954621770529862        0.010910500838622725     0.545136177739055        -4.970959952840553E-4    1.2619204067196261
0.9978203504426021        0.009632625944465971     0.5308594382358517       -0.005372390411579101    1.2381290633579065
0.9972406604010199        0.010582025773474437     0.5433221572256225       -0.004271447234397659    1.2310457765595861
0.9992149034777347        0.008838337812104443     0.5208771136065061       -0.01387821091527612     1.193899042990367
0.9987634175015581        0.009638139610072495     0.5323921849588386       -0.011248247654162059    1.1971361849467899
1.000171443675428         0.008764165348889883     0.5202211181032651       -0.023000780356420284    1.138398420367066
1.004569228976819         0.0012799770660132722    0.29114943100360746      -0.04101526989399854     -8.161765148629733E-4
1.0047297167469875        0.0016553320510607782    0.3055069230797213       -0.04901603581675485     0.11048163929939812
1.0048621488908902        0.0021285081588495545    0.3225752829163823       -0.057354759838032295    0.19265760415376024
1.0049649478770613        0.0026817104078445055    0.34222983279483105      -0.06483711563905947     0.28934220810874806
1.005001493776281         0.0033508599208249145    0.36520038478854006      -0.07131807697002589     0.3898349586163488
1.0053606378705098        0.003966471535998029     0.38741676067551456      -0.0727574904851062      0.48730247797788945
1.0023662291510587        -0.0018024825465453133   0.25999531445846835      0.07930464328258378      -0.3920937765927572
1.0027400191732272        -0.0015161334833472516   0.24815870407857465      0.06818266312482972      -0.446457739324729
1.0031383360670332        -0.0013739341713249647   0.2517245913256167       0.05818412251922393      -0.3714137966256477
1.0033237880459995        -0.0010675893882082963   0.24462651791882847      0.04561026863996741      -0.3959196439619824
1.0036485794849834        -7.784454382865829E-4    0.24777431948569406      0.03155806231427794      -0.33599220488509035
1.0038638234701343        -3.977671384387733E-4    0.24942006982117443      0.015413285244823705     -0.2997765607304684
1.004141135426979         -6.212718928370833E-5    0.2581412276587853       0.0017156508476512571    -0.22667780620870245
1.0044032322970096        3.2637533927446617E-4    0.2692504396333693       -0.012114902630960744    -0.13664310465196125
1.0046183958392507        8.06326830683925E-4      0.2823370190295856       -0.02697091278140309     -0.03385621141558129
0.9863636797159026        -0.003442891882296292    0.5037193716746126       0.07525069216792092      1.336579597340914
0.9861899610288826        -0.003741217376068231    0.5065165506288434       0.07312481591136345      1.3335026716106737
0.9860165885554792        -0.00401334468950828     0.5092425836376365       0.07131893795595884      1.3305481569018998
0.98534250589371          -0.00432596636838062     0.5164450707657907       0.07110906809495603      1.3163465092077493
0.9855999410626565        -0.004245452653723786    0.513905325467254        0.07084838415665323      1.3212561537597092
0.9858426237502538        -0.0042884492329663074   0.5120196845891657       0.06956682101999151      1.3262227425093274
0.9867378616699521        -0.0034377616510735862   0.5001441576503921       0.073920893290436        1.342858082715072
0.9996659897575522        -0.0016758495241245386   0.26335865220682403      -0.007927517556261164    3.542576789022793
1.000135961781786         -0.0018500309012620202   0.28553819226288435      0.028236268247122165     1.7103598372971727
0.9998807518263015        -0.001862446576585074    0.28657305156997775      0.00795344030249391      2.4684198689615813
1.0016306305856613        -0.0018314864814052891   0.25694500324083985      0.08603880684329228      -0.413560502898076
1.0012738587234282        -0.001979608980688967    0.2745755550664986       0.08302395411144713      -0.11641127306282438
1.0009231407848498        -0.002061407555420774    0.28954527453397333      0.07293642296551922      0.2646082560057385
1.0006028398249112        -0.0021127846867235824   0.30183161958431964      0.05711537104634199      0.763213122838914
1.000306405626958         -0.002139079033031275    0.3093179974241023       0.038241960592706355     1.306963206865151
0.9991274379930669        -0.0015685539210252948   0.2514711293093603       -0.009631851167185039    3.8744442338783007
0.9993649812367019        -0.0018040731548152056   0.27396160433306394      -0.013351321566466635    3.405982699506596
1.0020042540755654        -0.002040339904335119    0.27572624805039375      0.08471289078684686      -0.2440721256660323
0.9850774195029279        -0.004505146564015611    0.5194413455702519       0.070588309831887        1.3123890789436692
0.9847870363164108        -0.004628132152665908    0.5223411645938315       0.07063659357004902      1.3064627787094774
0.9844326121578038        -0.004688874405386307    0.5254115806747518       0.07139629253806205      1.301092842848765
0.9841463301347888        -0.004827244465046909    0.5282389454585382       0.07130462072190524      1.2954864200470269
0.9835523556757075        -0.0045573274765739495   0.5316433615645603       0.07530542896719966      1.2861323561702471
0.9831953037419169        -0.0045953717316435895   0.5344682623599777       0.0761249473543368       1.281060016478662
0.9838399135214544        -0.0047933007274683845   0.5304265411184409       0.07258978394857547      1.29031544982168
0.9829593581171655        -0.004140111018969469    0.5345996371542882       0.08022256915366009      1.2781374972183477
0.9829171690821051        -0.004423168219398601    0.5358946355013737       0.07823615377396194      1.2765680111999842
0.9827668901493566        -0.003936848323809948    0.5353913840442733       0.08228242966612291      1.2750577773897656
0.9828818122397904        -0.004728588980124099    0.5372921762716031       0.07609287017061488      1.2756046277021909
0.965933422705335         0.009040089773782766     0.634516425780506        -0.08763097615852028     1.1546837861676353
0.9670189735787786        0.01173366825956965      0.6367280493164139       -0.07673052637146556     1.1558168539437383
0.9656067706368752        0.010774369738635506     0.6391414769887681       -0.08222943217469718     1.1515059646804442
0.9773354411290974        0.016413833810150713     0.6220712514832555       -0.03913698990646803     1.1796073521083448
0.9777420416607683        0.017819169871775224     0.6280457993779595       -0.034733813451536415    1.1736186709868763
0.9756709459928574        0.016085947975627644     0.6249202171900787       -0.04434748432133867     1.1759289656042642
0.9683412761139047        0.012670990479700493     0.634866751695181        -0.07127403466219924     1.1597760451544203
0.9671609248314632        0.013076069536282018     0.6396952721933152       -0.07220819407903782     1.153361015996677
0.9696125590211597        0.013603764095203726     0.6335574653928351       -0.0658052698099698      1.1613176464941253
0.9741889144467892        0.015311167408589623     0.6257417474649349       -0.050239752158779356    1.1736933263407596
0.9709964339722659        0.014554110491322273     0.6323969733894851       -0.059949813416173905    1.1653530168086077
0.9725347015742014        0.014982264346186542     0.6293174131571652       -0.05521679755227498     1.1694331961675497
5.82166217678414          1.6680216610790728       1.0163669204293064       -2.325649305269814E-4    0.9999958707871907
5.657980527055731         1.8191296438287032       1.0095444582581197       -7.451098105968781E-5    1.0000560353989967
5.721053326645002         1.7257474499825762       1.0139604117575134       -1.54465470023301E-4     1.0000322330426343
0.9791910150203639        0.018400952029440646     0.6280357505896489       -0.02976523538067721     1.1734765006527557
0.9780255199221688        0.019163538983405462     0.6341711585924781       -0.031280343747594246    1.1661961865704813
0.9802552247322365        0.017612440101747992     0.6216525096726239       -0.02851703007352679     1.1805248234125518
0.9811710669764078        0.016817879108717824     0.6152056343903203       -0.027644630226457852    1.1881208302020763
0.9825778853364504        0.017060220502118705     0.6138953412243936       -0.023245798991746416    1.1899875116834568
0.9840813624158465        0.01726990545695331      0.6127176842593051       -0.018827471246047552    1.1897754822114823
1.0057579022104006        0.0045221689942356175    0.40542113716058276      -0.07294301927432434     0.566269924461917
1.005507594009762         0.005034989752318216     0.419403645663423        -0.07475308442036793     0.6088821276910292
1.0043210563703286        0.005441402565975564     0.4329645872080711       -0.0747439880248056      0.6748142089855992
1.0049281594169885        0.005289242944644826     0.42702113034494066      -0.07556546086636175     0.6426945432531842
1.0035842775308426        0.006627565491014448     0.46817961893923477      -0.06583754183404152     0.8211140257726129
1.004084319850109         0.0060394347985543535    0.4507024824388853       -0.07156330931447202     0.7375411551845117
1.0008165787739685        0.008420426857610233     0.514183206286266        -0.03017012252041995     1.0934230115954096
1.0015872792462244        0.007283573209066587     0.49210536466131727      -0.04200700046459064     1.018144647307354
1.0011561603706558        0.007934538696724456     0.5053616090277885       -0.034918145128304844    1.0634249980497013
1.0023839953879992        0.007419808885094384     0.4916706511984526       -0.050886171740761314    0.9488817946381934
1.0032336496140488        0.0073881749590781615    0.48706568604224504      -0.059194550983841875    0.88549189159657
0.9898117616650262        0.014860247411079202     0.5875437846210497       -0.0072576889629189486   1.217534422986943
0.9889034735069786        0.015757058439052306     0.5958729229224343       -0.008639880335280686    1.2069356492119303
0.9877260624380704        0.01636200775455302      0.6016886042409894       -0.010778996784031297    1.202101337543761
0.9855863673568166        0.017397356439499505     0.6115704903633249       -0.014794365474596725    1.1910337199668317
0.9868532315141998        0.01729733265897346      0.6095941669133846       -0.011947404218150652    1.1912500228192282
0.9909897366642694        0.01513511949890609      0.5896204565613692       -0.0050310219021890605   1.209590364679866
0.9916463172658507        0.014146841467324412     0.5802251935122046       -0.0041323314351797945   1.222231380304149
0.992910705286401         0.01416915072237985      0.5806956494602727       -0.002801537879317115    1.214652169896426
0.9939485280804007        0.013439976910837799     0.5737576174101848       -0.002111317854595302    1.219487931549936
0.9963945631267639        0.011249768808985792     0.5507937034513102       -0.0026123027695882806   1.233422917440741
0.994836779655441         0.012708290303667167     0.5664845631094116       -0.0018480207847447639   1.224245092311824
0.9956473900914372        0.011969041127295769     0.558734643241059        -0.0020022477163232776   1.2283558205315683
0.9983012919578886        0.01050152203585828      0.5437753783626663       -0.009351050232666884    1.196713630603284
0.9971645048825474        0.01157659365828676      0.5559234764428067       -0.005479912574615161    1.2077619929123447
0.9979270415011632        0.011382994291183304     0.5545594972264639       -0.008496499656476352    1.186934094408728
0.9996917175614393        0.00959611346225549      0.5325662936618079       -0.018588600231774888    1.1503778442173704
0.9992505892412661        0.010469075874089078     0.5442911714638469       -0.01555772794212361     1.1575857314133067
1.000886685066351         0.008952532168050396     0.5225488424855341       -0.03026332243203182     1.0845762887951425
1.000588692363632         0.009559637907132672     0.5318866982522684       -0.026725213137376806    1.1038564943674942
1.004996684102331         0.0012482960350474557    0.3016867583929184       -0.03713762364661671     0.09374958870990881
1.0052552238030579        0.0017518870454355036    0.3195020393142631       -0.046776480616314925    0.19623633662898335
1.0054593987707519        0.002310180832890436     0.33804777666390073      -0.05538462754582004     0.29190935887228836
1.0055922631265317        0.002915938993154247     0.35712622894149154      -0.06276184578494064     0.37521677622547617
1.0056738365156432        0.0034754531728226645    0.37446932075561995      -0.06761237839500575     0.435018639545507
1.0060788924477546        0.003922633918931812     0.39009918264079335      -0.06844308503572165     0.5140082513076645
1.0024089279646324        -0.002244075094673715    0.29246734543692793      0.0827839028108366       -0.10480990275644424
1.0027961377647643        -0.0020050939200526832   0.2799876675783474       0.07688971342322896      -0.18958692199944951
1.0031873325041991        -0.0017615003062412963   0.272790882593585        0.06763468667532667      -0.22742374255805964
1.0035423444124754        -0.0014736455169800126   0.2679600678449962       0.055922732145764716     -0.20173211264223603
1.003850853491418         -0.001179057236097612    0.2662964656692904       0.04361798863374091      -0.20155184333648143
1.0041479037770493        -8.291941113692761E-4    0.2669097225050821       0.029542199690176074     -0.16056781561226027
1.0044171016280032        -4.418572558842749E-4    0.2703373542760065       0.014776968431165398     -0.11867967093059913
1.0046028887748182        -5.55247141929011E-5     0.2747198874584118       0.0012291373738911424    -0.0822465179254011
1.0049335299229267        2.0841347003482303E-4    0.28568869163059923      -0.007163959015898699    0.03357686154175631
1.0052592281412467        7.336791070121482E-4     0.300084369346124        -0.021753279167917385    0.09925108052869659
0.986550123072481         -0.0037619903438574874   0.5032785170584652       0.07156592180505238      1.3404085023224945
0.9863500784647494        -0.004057071373562078    0.5064511198415289       0.06963951318956878      1.3365495523051534
0.986142840606159         -0.0043318875942196045   0.5096104807052476       0.06801661910039576      1.332393792182141
0.9853071640190982        -0.004638221358421748    0.5181793424345306       0.06865114979090592      1.315770662559676
0.9856202040237682        -0.004554675934293865    0.5151791197207755       0.06815172958661114      1.3206022882283446
0.9859416244730344        -0.004552523798701221    0.5124532165020118       0.0669145959131037       1.3278394772272066
0.9871474653177312        -0.003432499236084338    0.4960955075214449       0.07235696496666187      1.348047817767175
0.9869412969683541        -0.003786654461615705    0.49967632982826765      0.06973847064759842      1.347748331550615
0.99876505509746          -0.001670960188236576    0.26937250159901915      -0.004267434825595527    3.3831683474350775
0.9995999997717752        -0.002005620401768514    0.2961834109405555       -0.005558087779404783    2.79411043845154
1.0000328936911471        -0.0021641388014867623   0.3130050492807856       0.019731843213291588     1.8059287621925375
0.9997962250506461        -0.002176129613112434    0.312549346784757        0.005823810783427924     2.2199647220522922
1.0016158864764095        -0.0022958321607205656   0.2989983523198046       0.08305035667962384      0.021753581550701416
1.0011812844121757        -0.0023663592096420925   0.3113212935727796       0.07454297703702563      0.29781252559634414
1.000818349195391         -0.0024124231575211206   0.3219514715369563       0.0613409562840179       0.6659608032399683
1.000491669756616         -0.002438348105396562    0.32931722267386715      0.04531171635078968      1.0632145537354145
1.0001941410814683        -0.0024608195196850462   0.3336051798710636       0.028696074662474844     1.4665253181022166
0.9990338992227098        -0.0019360506135319908   0.28639503912975944      -0.012864691948576938    3.1427003793466795
0.9993084398819962        -0.002163544197810195    0.30627270090654957      -0.011250902629372969    2.7562546481422316
1.002039051391087         -0.002462645326447085    0.3084771926094358       0.08354209585017171      0.06766661825120661
0.985054264433278         -0.004870436606976905    0.521339055473088        0.06772704735246544      1.3099614194269396
0.9846644200385279        -0.005004966292494093    0.5250555028387563       0.06810636493069792      1.3038585219117103
0.984346308357782         -0.00509732343725712     0.5279398700403446       0.06854371135945625      1.2970090383123016
0.9849040122684191        -0.005188827041607439    0.5241147609872789       0.06579210147178692      1.305747056173775
0.9840034604794576        -0.005151750663798459    0.5307799061340145       0.06933879395269092      1.2922621810394455
0.9834377016693407        -0.0048867382131997745   0.5338332282892394       0.07320097216518044      1.2845137845573253
0.9830878895646957        -0.004967989427443138    0.5367388556061935       0.07371258068424807      1.278613473426434
0.9828328962121796        -0.005005020757778618    0.5387398702862106       0.07423556594299434      1.2743517753729026
0.9836462159203034        -0.005199351339526438    0.533648241720171        0.07020498402514147      1.2864115639727778
0.9826949133689551        -0.004229573626081312    0.5368666110582693       0.08030471015533859      1.2733515716978852
0.9826439739573397        -0.00454481734203161     0.5383407389433388       0.07813711170742631      1.271846275059182
0.9824773694942691        -0.00401875310092558     0.5377937712681345       0.08245918167674572      1.269843695788107
0.9826141527719514        -0.004866060558681047    0.5397625854061611       0.07589808291009802      1.2711742300513775
0.9642159581913647        0.009582039026912645     0.6413890401669472       -0.08823808450601488     1.1467953480884343
0.9655748292151575        0.012806822391372272     0.6439068430510516       -0.07581091109667636     1.1487609250407973
0.9638606634022406        0.011532771838829066     0.6463474785794392       -0.08245168706902212     1.1439345270479426
0.9761744147660405        0.017480892333272463     0.6300356370632566       -0.03952183134788891     1.1711609167996666
0.9767357295529577        0.018608939995495406     0.6340444610455325       -0.035602312588324775    1.1665056002629477
0.9745049866670176        0.017100957012871836     0.6324006517152063       -0.044624192233721875    1.1671375398530348
0.9765935934923051        0.019824149396089178     0.6400345361392442       -0.033524485906642275    1.1606258206750732
0.9666039558674928        0.014151166276195387     0.6442681233352424       -0.06997785771743469     1.1504425075281175
0.9682036992532745        0.014395227867402594     0.6402263226905259       -0.06619290750950067     1.154381208111267
0.9697395300854397        0.015056399046463387     0.6378231468138332       -0.061171819381146506    1.1597660258057818
0.9728568639520112        0.016554269177750342     0.6344572367437955       -0.05001747019439554     1.164706224045842
0.9704939853125684        0.015859087871896344     0.6383414629659276       -0.05725360851140789     1.1577700946953449
0.9715950677695342        0.01586104808109378      0.6352831159410627       -0.05481174811275311     1.1627725731968523
5.821769235415854         1.5570146899118886       1.0205277053914334       -3.4459368745462304E-4   0.9999767270978485
5.551594427392604         1.8172086013398687       1.009716304631631        -6.600297403574767E-5    1.000074309766983
5.735118131633769         1.6117719342622585       1.0186801719767333       -2.657429354613983E-4    1.0000100532558702
5.603940078619878         1.7254636315781995       1.0140657806923121       -1.4738461757872378E-4   1.000056415236173
5.65193339459028          1.646983040887609        1.0173733334325092       -2.2399939847099552E-4   1.0000479448088415
0.9782627369739769        0.020582897098339877     0.6407952826314123       -0.02824629475063589     1.1600618018235824
0.9795644055970045        0.01978782729882464      0.6346858822347833       -0.026384406994247604    1.1659711475009218
0.9807158742611585        0.01893005156449724      0.6281782914897284       -0.024909415748406227    1.173032190923547
0.9817221055452738        0.018019042532340115     0.6212530003347662       -0.02384705683265088     1.1809732337836714
0.9832703221442818        0.018321843815607978     0.6206846532125772       -0.019387937708417517    1.1808900251249212
0.9848597837305626        0.018518778636434155     0.6199979850872034       -0.015291281013518376    1.1793515344290766
1.0065426088060043        0.004495489528476323     0.40784578446480885      -0.06916720957252319     0.568786882968392
1.0062109109176678        0.005150621883923888     0.4234082172806345       -0.07284407093883256     0.6121502239590552
1.005669522563527         0.005647600824752017     0.4359135954159931       -0.07452956207117618     0.6599210222735031
1.0041039580524838        0.0073705968316944035    0.4825082770951033       -0.06546682161486711     0.8335929546378856
1.0049373105058326        0.006026901678916409     0.44717784067718597      -0.07396928118395436     0.7091220393874781
1.0045051763355468        0.006708089485119588     0.46571728624592706      -0.07036970755409518     0.7767272299146107
1.0014292625784684        0.008614014873727286     0.5162912826050537       -0.03655642858073368     1.044237836220015
1.0019564554500346        0.008050168790765706     0.5052156925321158       -0.04381376450093865     1.0006731939813245
1.0028459361769277        0.008103416352856418     0.502861138978748        -0.052529148286204065    0.9430739062139736
1.0037356221049634        0.008026198256156018     0.4975395448020041       -0.06009008126795622     0.8927760283611573
0.9901144883665042        0.0162738419583428       0.5997304204255984       -0.006167780871633379    1.1976804177221119
0.9888996956242848        0.016801774615339018     0.6043839616327743       -0.008084800971351284    1.1946029997496697
0.9880557590435213        0.017744008340825877     0.6120725060719177       -0.009182558466814436    1.183595345495953
0.9866509853536921        0.018691093517709177     0.6196338864052393       -0.011283847677034066    1.1782862429004084
0.9915501404032214        0.016282365043413724     0.5998000731833065       -0.004448875132385163    1.1935914245391028
0.9922234592456953        0.015311249196348724     0.5913847878514544       -0.0036962684392426834   1.2033370657175644
0.9932795259508438        0.015359809969049305     0.5923059696411769       -0.003353114566520684    1.1916965303056681
0.9941085940148366        0.014684274616777682     0.5864885494424333       -0.0030624257341927276   1.1960969906086543
0.9950412211952795        0.013915951941577909     0.5796531006676099       -0.003211145434551414    1.1970116920333076
0.9966249828205114        0.012270858737890855     0.5635023272609159       -0.00457946697453673     1.202680609602061
0.9958895699909833        0.01309895777113053      0.5719196852543621       -0.0037451484007340473   1.199468371475506
0.9988185634475983        0.011324448975735764     0.5547695788055577       -0.013317607303403612    1.1597655132202276
0.997635276563279         0.012397320679899411     0.5661661037914082       -0.00831280844132448     1.1774894504992908
0.9984453998216557        0.012046702034362648     0.5629403997037757       -0.011827601466475629    1.159586792201715
0.9909567750966263        0.017190751079460276     0.607217167111946        -0.0051917151908056295   1.1847715419134988
1.0001979101286578        0.01042130261068011      0.5438692332926923       -0.022886164212948003    1.1157323982189313
0.999743873333704         0.011340626353173098     0.5554099511421632       -0.019410962459877387    1.1251231986408856
1.001427445932455         0.009404772133374718     0.528545471753273        -0.03490883088305908     1.0518774718594754
1.0011635882870218        0.010301139813407802     0.5415508297541112       -0.031128728815631945    1.0705348388572526
1.0056117922532233        0.0012872444060662437    0.3174663724161275       -0.03399192145723278     0.20714756517543095
1.0059172684266589        0.0018778548487109689    0.3355356396666847       -0.04431564767615558     0.30167323860433864
1.0061645543861746        0.0025051844561853865    0.35389536819755474      -0.053104924761889986    0.37243890958203024
1.00633589535714          0.003221361495204322     0.37367646868274196      -0.06094628887769853     0.44639945356048105
1.006835968660111         0.003852489477240119     0.39387438015656895      -0.06354452844074833     0.5309443967790067
1.0073709844269707        0.004428688281274362     0.41089708804487474      -0.06471499625231035     0.596168710554164
1.00593197334429          7.727328751275708E-4     0.3179068666389591       -0.020200485668203722    0.22142942385688524
1.0024217384819276        -0.0026852057185412365   0.32181609658045246      0.08283921384518832      0.14606554356863524
1.0028255297235413        -0.0024719650059199087   0.30908025058492733      0.0807916656566169       0.03263200621981844
1.0032466123209465        -0.0022395167258213353   0.29947015090597434      0.07495241200010416      -0.02281871005856839
1.0036577030638496        -0.0019669466159012773   0.2924165587008793       0.06595979197697212      -0.04367697892249484
1.0040440951589256        -0.001648876523155797    0.2877993164656114       0.05461880449237246      -0.04320369941410762
1.0043921529626698        -0.001305819272402726    0.28594798267534755      0.0421699227541238       -0.027380064714696343
1.00471250245802          -9.062682731131337E-4    0.28621985866789834      0.028216248157495957     -6.016081769457471E-4
1.005038065948018         -3.9848902143959286E-4   0.28984874763722995      0.011414470757472886     0.046949236910347754
1.0056268664205783        1.5851266116912916E-4    0.3058174274974978       -0.005078924658626448    0.14007088783357166
1.0062414416220584        3.6344735982517435E-4    0.32254163467062413      -0.009480764435442133    0.24895541867130264
1.0061895021388234        -8.160469517364491E-5    0.3204237240217612       0.0013642204448524548    0.246726047921281
0.9867162307114302        -0.004114134371718301    0.5033735041743342       0.06760760720759319      1.3439076074133782
0.9864777568002587        -0.004408250360573138    0.5070351525259688       0.06595611613348923      1.338508302707126
0.9862094708199823        -0.004681033905792716    0.5108266626945152       0.06470663376641944      1.331828405714034
0.9854375782047785        -0.0049105793690347515   0.5184653550703825       0.06593573073915283      1.31632143259122
0.9858698778731452        -0.004920632369909687    0.5149753943492305       0.06410791274780968      1.3242742329745727
0.9875971453248811        -0.00342751123929276     0.49142934342249106      0.0702890705194117       1.3617083388197762
0.9873709538249044        -0.0038158495872168824   0.49560658116005246      0.06748116220387627      1.3602362112007766
0.987121706298038         -0.004175329280765304    0.4998987506158226       0.06520767970517033      1.3543277421126936
0.9983556133164488        -0.0017911724106699563   0.2884867527383613       9.743086780303086E-4     2.9832240214724535
0.998661703367815         -0.00207919454900622     0.3005804142277959       -0.01006081820345467     2.865720773971917
0.9995835619550795        -0.0023517505537308902   0.3236200993974228       -0.0019342862833946082   2.3085231025391466
0.9998838329793772        -0.0024968276680816578   0.33598846928887227      0.01217081484182478      1.8382305651979431
1.0000886570244543        -0.002776094315429721    0.3529665231802483       0.022585893733745043     1.497227883853552
1.00176280993368          -0.00268530416443838     0.3264992771097999       0.07994944008360337      0.23285546779117233
1.0014195826209922        -0.002705118997505071    0.33256042143476594      0.07424492408065679      0.42257895760681236
1.0010371678923455        -0.0027447661560809802   0.3413185136245549       0.06352563883096823      0.6506551218503306
1.0006781773637248        -0.0027573221091068047   0.3475196424154467       0.04983612259135544      0.9427080145060621
1.0003650887469429        -0.0027628861322908592   0.3511113786276698       0.03564507353282633      1.2405853517975285
0.9989727403974411        -0.0023351634199992354   0.3174046516522964       -0.012977967260339436    2.6282415539678023
0.9992878098055132        -0.0025550068715300598   0.334572320970056        -0.008030920897371292    2.308851380061028
1.0020587959038778        -0.002900997000999588    0.33764071382900235      0.08052999800146092      0.3065589010685757
1.0024049753950488        -0.003075784029682618    0.3451450954956293       0.08086177991099829      0.3149374092849413
0.9979015587323085        -0.0019250446134161606   0.3073752526241789       0.005775355746150463     2.670810468007074
0.9852036577062254        -0.0052096022304645      0.5218837352047259       0.0644716982721873       1.3113522713411763
0.9842182671987025        -0.005493965030195306    0.5308308835467176       0.06603282444788737      1.294232821752585
0.9846176137081051        -0.005417625331170921    0.5274628615743798       0.0651242885616903       1.2997416493484424
0.9849801049425381        -0.005441407358899607    0.5248506702259907       0.06356316444937699      1.3065977642672264
0.9838443458086341        -0.005547218493334733    0.5338310423263257       0.06698036936626818      1.2884469500533344
0.984063516374518         -0.005898578839000217    0.5340289702869142       0.06366083351778325      1.2899929383672084
0.982635953787807         -0.00519370038158144     0.5409214785128255       0.07349031105822403      1.2713297680902313
0.9832809344241799        -0.00525747068021602     0.5365722975726844       0.0709927904747142       1.2809410152138605
0.9829444416739803        -0.005270176248149958    0.5390476847773206       0.07198378148270974      1.2755176374008415
0.983470507201874         -0.005594418319814766    0.5367514622802477       0.06793520289559675      1.282851620717679
0.9824024615725525        -0.004342088107889401    0.5393878930361281       0.080298811349306        1.2681663989582732
0.9823526708109444        -0.004684052709423349    0.5409545272343713       0.07797041723611275      1.267188230313552
0.982161647211843         -0.0041154891288746305   0.5403988687872007       0.08259816389180975      1.264056105484961
0.9823372815414005        -0.005042383284012272    0.542430012113543        0.07545877057714202      1.267089690414022
0.9823659673019156        -0.005420975213223098    0.5437762294543359       0.07270728120591423      1.267533368453172
0.9623200271289502        0.010176270910660543     0.6485866240508598       -0.0887582275119564      1.1397406562011463
0.9651849420344348        0.014784967403907789     0.6500480595366277       -0.07066498487340049     1.1437563047140158
0.9618858097920134        0.012282588360046446     0.6537990742638345       -0.08298670212067673     1.1362408546990999
0.963587858800888         0.013600775253165663     0.6516909388735654       -0.07667330403198393     1.1407248384724034
0.9751094412596029        0.01890197656272625      0.6388354338948846       -0.038950691178711305    1.1617482581834666
0.9730293560189347        0.018271486759440878     0.6408509911625776       -0.045317706945244625    1.158982132980183
0.976986806263179         0.021414489226679028     0.6467842334447433       -0.029891645967102625    1.1540580869744577
0.9752631089306729        0.020841536681450355     0.6470786500451423       -0.03479617772950603     1.1536060216160295
0.9669221081345842        0.015739832338758936     0.6478625083387165       -0.06486296321443495     1.1478148228686962
0.9690455407188769        0.016468373299214207     0.6443163708696137       -0.05866825513411116     1.152150779842681
0.9710933540167253        0.017355508441388067     0.6420616665257065       -0.05196673619634801     1.1562891180899684
0.965270796286376         0.016844648280848445     0.6553944971283775       -0.06496173656085259     1.1400454421130493
5.820601965846776         1.445582436773391        1.0237465149502312       -4.8227542069196466E-4   0.9999608270849193
5.442941538953231         1.8175143643646106       1.0097702214440494       -5.905807383704497E-5    1.000101520100246
5.732569144679861         1.4999460166505043       1.0224088827993763       -3.964860270898465E-4    1.0000030469401864
5.49856126658886          1.72345318954206         1.0142509094882062       -1.328844007613419E-4    1.0000878044097818
5.645630375895969         1.5514856190729787       1.0208978023336217       -3.3080812010189797E-4   1.000039523512626
5.553925060156782         1.6204465695420318       1.018552657595439        -2.467225100653676E-4    1.0000819930607852
0.9785300242425955        0.022036204758805213     0.6475270433092737       -0.025544518892572813    1.1537156485483793
0.9773666837271865        0.02265364857880626      0.6519859800018489       -0.027273174302503984    1.148667438127831
0.9798757527386167        0.0212709642965398       0.6419636633066469       -0.02352669771757795     1.158591511480626
0.9812202326012216        0.020388229453594954     0.635540697615438        -0.02156101247232559     1.1642044933470581
0.9823422598211087        0.019371820101350967     0.6282977529901043       -0.020237634890202607    1.1724400666623145
0.9840294818067233        0.01970364675053451      0.6283577895433171       -0.015963670335912773    1.1716884734959583
0.9855278874170998        0.01970973248245459      0.6271732745610916       -0.01284464948246795     1.1703863945389055
1.004459871870489         0.00792845028216746      0.4924328787023454       -0.06491938050622992     0.8505476323028314
1.0070120313386939        0.00508853204049064      0.424206339731795        -0.06953543803392105     0.6226257009343149
1.0062854996275408        0.005699861096067572     0.43733067760139155      -0.07321360619514058     0.6707801092629454
1.006703294292379         0.005563435443330149     0.43451333914606305      -0.0719179819513579      0.651919836594408
1.0056850474167607        0.0062567094260698505    0.45126590185401483      -0.07361432637677998     0.7145857838153464
1.0061342996717164        0.006072079408714979     0.4463135193797629       -0.07353647935137755     0.6878095975664209
1.0049213933472132        0.0074191417103575555    0.4800969099961177       -0.0690270643574048      0.8041451281314762
1.0053998547228846        0.006764969090296842     0.4639236121980965       -0.07242016803179768     0.7529540374378837
1.0023375944761308        0.00895355083424139      0.5193771418359638       -0.04475732794552788     0.9938861624611783
1.0034279400665063        0.008785610668859956     0.5126218473129903       -0.0546671311529141      0.9349546016712695
1.0043258008700628        0.008568541403906393     0.5051687988692618       -0.06159789738833003     0.885468191277398
0.98968983421472          0.017889586211166687     0.6127220595967221       -0.006533931695368033    1.1793671436541644
0.9883794028610623        0.019245635601497123     0.6227687015687149       -0.008136548629520457    1.1704927544049817
0.9869431266158609        0.020398117167448607     0.6308853060626758       -0.009995839955033711    1.1630847664725097
0.9919398905488157        0.017386186163958477     0.6090520471242011       -0.004608064892562984    1.1753120835787298
0.9929374259495566        0.016635200019086388     0.6033976504021036       -0.004013008741983739    1.1760589922801346
0.9942173484387403        0.015999524915629344     0.5987241520786428       -0.0041683929641683345   1.1751671577648521
0.9952542351373546        0.01522123324119189      0.5925511712398236       -0.004723096862861043    1.1741957507787497
0.9962095234736721        0.014343328430837863     0.5850911314115915       -0.0057568444753640325   1.1720464794725505
0.9969772419422218        0.013387143408037882     0.5761980820483544       -0.006976033036332535    1.1752636039660842
0.9979233248839184        0.013491030357129457     0.5781307529842644       -0.010598725755962239    1.1521147152307845
0.9992467685525632        0.01220553917644568      0.5652773481851722       -0.01643766213817029     1.1311619313536383
0.9986005398321042        0.012922846040529677     0.5727257178652283       -0.013271482036631614    1.1397022179698775
0.9912882307337871        0.01843088883328794      0.6169893982075162       -0.005192961287864736    1.1660217577432694
1.0007646398363026        0.011299513491381372     0.5546136374605305       -0.026905005103851676    1.0860788922052012
1.000250150738356         0.012325244578112772     0.5666773483322053       -0.022771234657626652    1.098790703973098
1.0021588528231258        0.010047757203688766     0.5362624790005927       -0.04017404994262291     1.0196814210410203
1.0018411824934657        0.011143963062647122     0.5513896323428719       -0.03537985027407417     1.0432398929389572
1.0063103757017557        0.0013390165250638138    0.33361423919982086      -0.03129960176259066     0.3081319244073904
1.0067537519782224        0.0019903605081213636    0.35258216607274134      -0.041138549761980996    0.3827253240253975
1.0069287486577436        0.002715410059030984     0.3691896902765573       -0.05095158094600651     0.4560236935022636
1.0071041889168086        0.0032985099285146027    0.3836352771292506       -0.056735567430298714    0.5005592452221919
1.0076260443289675        0.003745096329022125     0.39811031439590855      -0.05814795141477872     0.5660180332667809
1.007984542136246         0.005088872346714865     0.42835090727141045      -0.06565330193117576     0.6495147026613212
1.0082247112918026        0.004301649965702101     0.41411858263705265      -0.059685115347471625    0.603215319414281
1.0065902340695587        7.709243004249043E-4     0.33299859181529273      -0.018021382665810368    0.3156370998626354
1.0027931505133791        -0.002955767853524502    0.3369470260344262       0.08161737716524886      0.23098325058776417
1.0032715314938423        -0.0027430641789678387   0.32639666581535115      0.0790177224259435       0.1592369922522933
1.0037389187804875        -0.002492376654477408    0.31794848034792905      0.07300969426831759      0.12064846098990954
1.004184163628831         -0.0021898636769240648   0.31133609569723514      0.06417755986873602      0.10108271076014823
1.0046037054941286        -0.0018385413522318851   0.3069342016734305       0.053195246843316224     0.09997891771120863
1.0049912173554014        -0.0014385446827001106   0.30483496211328537      0.04063401178169515      0.11174105532302132
1.0053667368999268        -9.884751249319974E-4    0.305755286971609        0.026780766707987267     0.14000528354502403
1.0057943238266847        -4.885904672025744E-4    0.311583192495654        0.012217628740510822     0.17707225277724992
1.006821931149927         1.2009245334090979E-4    0.33503716645581205      -0.003293334813534481    0.33930114116963167
1.006473773841211         -5.52657756608515E-4     0.32849497269075373      0.012218579142347823     0.2880276903774106
0.9880916464593213        -0.0034237814546063425   0.486304887170882        0.06735873925103252      1.3975773149826425
0.9868542327491676        -0.004499375807878829    0.504156186870671        0.06347064591443695      1.347295589202704
0.9865634928423287        -0.00480243918418475     0.5084548619676951       0.06212163863927376      1.3394902155220298
0.9862565443563968        -0.005071280864107498    0.5126205807289722       0.061213203664980696     1.3315167912750792
0.9855701072909169        -0.005268707160676449    0.5193190989585225       0.06252232251486566      1.316268833952571
0.9859475962633436        -0.005334368983728557    0.516683189965728        0.06041315243234872      1.3232438951253618
0.987843856384015         -0.0038502405462980346   0.4910986628610943       0.06461241213100495      1.382151868089097
0.987570228888166         -0.00424468107524507     0.496048402561237        0.06229717767386409      1.3693221970777019
0.9872732597457662        -0.004604170994007712    0.500989527949264        0.060499581161529425     1.3582097091872276
0.9886345014280131        -0.0034158984549501007   0.48109078562188534      0.06426639923045883      1.4331796651731248
0.9982425072870296        -0.002245246473086446    0.3163318242805136       -0.006418875104736607    2.612281170682532
0.9985920263643546        -0.0025283843982722375   0.3300818309517816       -0.012277447206640146    2.4667362495970067
0.9996049167631849        -0.00273299913113639     0.3485471404889405       0.0023739425304294026    1.9754591026692403
0.999867983877361         -0.002845359873678421    0.35629875202874856      0.012996415637255967     1.7140063903167744
0.9999910182802889        -0.0030415819530680145   0.36691568089807736      0.018435716068702757     1.5281411588974396
1.0002276257829732        -0.003061766784405806    0.36780217445922786      0.02804766514471907      1.341621066726644
1.0016807332760334        -0.0030619273365195872   0.3514308333859822       0.07418998572057499      0.4699429252894544
1.0012653771755369        -0.0031104623876640953   0.3598497011221434       0.0646487700076817       0.6762282283641654
1.0008602365862524        -0.003116911075046696    0.36552403805334577      0.05224283098867446      0.8941850048544994
1.00051280559558          -0.003086304303753453    0.36744552075114983      0.03959608022520164      1.1243035734613755
0.9989475300820135        -0.0027699821129668974   0.34540419895597857      -0.011142791358895234    2.2507328388174455
0.9993095464283743        -0.0029798243252422145   0.3599597953886427       -0.003892559179302127    1.9804705262796196
1.0020893854236892        -0.003407286439641544    0.36591046994071164      0.07592082988747771      0.5002993465954423
1.0026630241414192        -0.0034309050272710155   0.36242221934893437      0.07968479145257985      0.421909183360304
0.9974009842864728        -0.0020770304711472728   0.32576373460244706      0.010072405359635042     2.4251713989515076
0.9977782786819844        -0.00243053433456483     0.33249539750583174      -0.0025591440633479234   2.395911824545893
0.9852758871736458        -0.005577431092728673    0.5233370165426497       0.061331864126532666     1.310299603474489
0.9844674857034987        -0.005853431939002291    0.5308801173490978       0.062471628906114844     1.2961479336168875
0.9848993538562942        -0.005813551098526504    0.5274932746558677       0.061082838601359        1.303185769769458
0.9842906168014439        -0.006261579718092163    0.5343967257644479       0.0602416190341501       1.2915523319475781
0.9836735804798068        -0.00594425532919994     0.5370293640461153       0.06474787443985398      1.284271181581626
0.9838890401666892        -0.006289878639629465    0.5373444746718569       0.06155572688959187      1.2854654500514824
0.9827185836111222        -0.005566110134919459    0.5419360567220807       0.07060607475784718      1.2720989456817178
0.9830995537474247        -0.005625890428428727    0.5395345668816237       0.06895591302148381      1.277281336244753
0.9832799690145184        -0.005991626068967812    0.5400154000961722       0.06579110232937752      1.2779466859641972
0.9824229744235599        -0.005848195335182388    0.5452493579875983       0.06957605988033032      1.2674016499431657
0.9820830469042036        -0.004469689435420887    0.5421248193708995       0.08026259479552433      1.2626613439290357
0.9820339062124651        -0.004846986538569505    0.5438292633358505       0.07771420380087936      1.2622586372202678
0.9818151380563621        -0.004225711005053875    0.5432311966129263       0.08272286405528724      1.2575178113838168
0.9820202432272067        -0.005246340576814235    0.5454744121997038       0.07494242282810293      1.262540421456306
0.982042357672854         -0.0056780303133815236   0.5471122374023308       0.07188611176160477      1.2629499769869417
0.9602336783891631        0.010816391266708157     0.6559046446138527       -0.08933275860030014     1.132509660064519
0.96344749792825          0.015718168859261136     0.657188979692391        -0.07104442047892644     1.1369656502002903
0.9597587290475782        0.01311183775375162      0.6613972972665393       -0.08348980952519341     1.1284838880603454
0.9615808245420392        0.014487069157228104     0.6592890804523086       -0.07723684536679566     1.132689638246329
0.9734648993892921        0.020185873760463633     0.6476926260495467       -0.04015728057088764     1.1530387963569757
0.971438958069618         0.019500952026792934     0.6492300512780756       -0.046148266562591085    1.1501989434922049
0.9758476838385015        0.022498357518229116     0.6534152569863484       -0.030783732051315054    1.1475252579233235
0.9740070085788956        0.022061500481316384     0.6544429102883234       -0.03551730950427739     1.1465910030212123
0.963493735995728         0.017841925141730348     0.6625517912370104       -0.06556509058447292     1.1337394532630245
0.9672384030396067        0.017845874881249408     0.653364147717154        -0.05874504868066579     1.1441378445498136
0.9693268062634954        0.0187422752360063       0.6512810973396473       -0.05238994057172735     1.1469160801226932
0.9653874069829811        0.019023249218264697     0.6613421912592695       -0.05941195091954284     1.1353760921392462
5.819680496249573         1.3340712784296342       1.0258272724895325       -6.496850088611523E-4    0.9999485357065367
5.332672355707763         1.818690126463604        1.009778287656994        -5.752773569715375E-5    1.000129894791623
5.730416499381081         1.3893927433759732       1.0250795188638167       -5.492325388508351E-4    0.9999912082653643
5.388487240854964         1.7282222753041898       1.0141278985447324       -1.2643912021590928E-4   1.0001169364716256
5.641910508493068         1.4444452337357794       1.0240122465562733       -4.589079057568703E-4    1.000035785647906
5.441411227260478         1.6362391062999024       1.0180332323477648       -2.2428320332987714E-4   1.0001015501371953
5.555287799647747         1.5014546759131968       1.0225967268227227       -3.7519189672088286E-4   1.000082010456058
5.475524401597076         1.5519734913552603       1.0210706348432004       -3.2273003240015653E-4   1.0000943801385345
0.9768886377456443        0.02385247328716277      0.6580080160582197       -0.026759192297271684    1.142380242968317
0.9785799383557423        0.023466501942279547     0.6543357878290151       -0.023746966589083266    1.1464844265480585
0.9801080551168162        0.022828613075789317     0.649603685167043        -0.0212395385966698      1.1511886967578409
0.9815690619000851        0.022002014093884806     0.6438998026710229       -0.018995752857255983    1.1550049206430304
0.9830454878164896        0.02094425007641845      0.6366647349475708       -0.016903956567752457    1.1614477401015264
0.9851311499107962        0.021355455390940928     0.6375729960819841       -0.012559271633888106    1.1579211413962407
0.9800358211680051        0.024148002256323346     0.6561499717953276       -0.02016892492952979     1.1436315377094168
1.0051982150515975        0.00826082813405725      0.49602875519834033      -0.06691463658565801     0.8363695135619568
1.004861430740236         0.008975132287388016     0.510289161115824        -0.06272855880644462     0.8733324878225501
1.0073489427172722        0.005759453890665711     0.44031332853460364      -0.07039912146165216     0.6713036241663911
1.0067114299537299        0.006063465966060452     0.44612045355724433      -0.07252275685977526     0.696063494845998
1.0063210707281658        0.006691508174324065     0.46038516385522454      -0.07290333661323574     0.7349883939483475
1.0058392683137882        0.007485926517989005     0.4784596726453465       -0.07104888989920354     0.7839895031379313
1.0032155375852765        0.009733511651965622     0.5286570333103063       -0.04961084177218263     0.9688285853027488
1.0041472876910922        0.00933285300526267      0.5190470055111477       -0.05749620897168246     0.9231979733333177
1.0048883705410372        0.009592972219385099     0.520491759267035        -0.06058776595429112     0.9011694784437841
1.005694751010062         0.009162101338610213     0.5106018175154441       -0.06547271912092673     0.8617921606284911
0.9901535661247671        0.019696088777551544     0.6259204411557371       -0.00620224672130188     1.160102262932643
0.9887831458138125        0.021054919594280845     0.6348390807943195       -0.007523474790378944    1.1532608779044287
0.9871861902927069        0.022331939086642643     0.6427527457544279       -0.009220510118059825    1.1481567244589053
0.9929668805608868        0.01839172584454405      0.6174671677987815       -0.005020780282520394    1.1568958482821772
0.9942823976909975        0.017435226011926517     0.6107885475544278       -0.005249879938959302    1.1578635926891723
0.9954513001194328        0.016633069417287052     0.6051250815434893       -0.0062239079566677085   1.1529413047918766
0.9965183046784039        0.015741663367720104     0.5983369735142151       -0.007793654252056752    1.1492192027896644
0.9975859642489932        0.014684140670817861     0.5896173349462578       -0.010186473782036265    1.143045753281495
0.9988026966336205        0.014066287779479915     0.5844394598958101       -0.014868590219896753    1.1244035559828642
0.9996230763743738        0.013273011479869472     0.5767684420409512       -0.01889635301473692     1.1095708593477802
0.992022436171851         0.02003100246968649      0.628839623967683        -0.005677813016656743    1.1483200896104873
1.0013922180418944        0.01226846051269809      0.5652647162650163       -0.03053509323568004     1.061994992979967
1.0008060458861616        0.013435027926343844     0.5781251434568419       -0.025772556980396575    1.0782281857250071
1.0029821414562023        0.010866604644346875     0.5453280768150739       -0.04455211199899489     0.9969273359787302
1.0025908156477652        0.012085388351320286     0.5613315819801804       -0.03903428932902381     1.0222768928687669
1.0082908737120433        0.005896730059645513     0.44572364192183594      -0.0676282558794629      0.6954813136387162
1.0070578153588863        0.0013361560908128596    0.34831119722319975      -0.027847200446205842    0.38417383080058537
1.00746995002046          0.0018248032159229929    0.3620547199934725       -0.034634932689837486    0.44774602835487815
1.0074275660254286        0.0023340974826005934    0.3691785961079406       -0.042726527573032004    0.4556257329897237
1.0077942875800816        0.002958192282075465     0.38463430487025635      -0.049025337066337986    0.5218893183126451
1.0084259852046886        0.003629142421128282     0.40344501553169776      -0.05301517306242525     0.5763242772971565
1.00869103757632          0.004756595279117764     0.4258872443851228       -0.0605912143926576      0.6510536871981185
1.0087754159601299        0.005299523585080075     0.43631470041577136      -0.06329153522840138     0.6695022207525791
1.008989131652457         0.004206644173390674     0.4183763053728997       -0.05530624418156158     0.6291739995876108
1.007378471628464         7.768802194397734E-4     0.34941011844221387      -0.016045957588750773    0.3973390238766111
1.007687009456724         1.1576825417073743E-4    0.3528522403913507       -0.0028566664764758305   0.40770618928646624
1.0032085679409317        -0.003296400027556745    0.3539616351577286       0.08036790197532974      0.3414152154648871
1.0037855502894493        -0.0030490239219856615   0.34375116405389733      0.07712966500358275      0.2728291724781185
1.0042861332262332        -0.0027683796558643863   0.33577860823380673      0.07102953209367315      0.23865272486393904
1.0047725014594915        -0.0024267446828671077   0.3293975177342119       0.06225511223511621      0.2214624944422993
1.0052369220944015        -0.002023359179806827    0.3250339313252057       0.05125779503832339      0.2196341360593774
1.0056640285035443        -0.001570266905127885    0.3230629475575147       0.03882583653376118      0.2273035194366769
1.0060709978575548        -0.00106882874382274     0.32395797703983803      0.025417967678660478     0.25167291576578604
1.0071986765415126        -5.408358715584534E-4    0.3441639877030129       0.010524902790399223     0.3760395977142365
1.0067624329675693        -0.001115006524413446    0.3394071068020981       0.023584506834699436     0.34174580482165423
0.9892297810565465        -0.003416701041461744    0.47509473012001807      0.06130494379686136      1.4502178673933026
0.9883638817074235        -0.003889784180502022    0.48632077405360835      0.061258210950518956     1.4031670357128723
0.9869520715540766        -0.004935360871592112    0.5058970308233475       0.059156959974681296     1.3480670131265298
0.9866200366496218        -0.005222737714447549    0.5105230467095199       0.0583025098617958       1.3383108659120138
0.9862995591920551        -0.005470793337340038    0.5146978822192928       0.057764540997495596     1.3297897023509613
0.9856779267425747        -0.005623481324651552    0.5205200065412221       0.05929430726214192      1.3162926718911692
0.9860104019504565        -0.005649515264458655    0.5181032646931952       0.05765141521562685      1.3230239164312758
0.9880654257367246        -0.004322512766032399    0.49189771583587266      0.058868895498540526     1.3856937552661208
0.9877389346253945        -0.0047212704684542      0.4975594559844024       0.05701660551397553      1.3707892957352623
0.9873875597073903        -0.005081526223143754    0.5031114755484403       0.055712701216998305     1.3574093325850918
0.9889354631196383        -0.003934161931130371    0.48114978085901544      0.057632704465332814     1.4271090428808222
0.9981665110783515        -0.0027428753779020036   0.34369050333160045      -0.010246640168049881    2.3054990505330095
0.9985618619800639        -0.003015287787153403    0.35737971257580187      -0.011976692686261005    2.157098618800895
0.9997029196220445        -0.0031504519195206977   0.3715078438640625       0.008298483784277862     1.7029683755008702
1.000037390702153         -0.0033598086981869286   0.38210454319783244      0.020425220517327338     1.4346882220126875
1.0003301067930477        -0.003343951220229279    0.3807793549866045       0.031074779630067485     1.2578239943844522
1.001542069681949         -0.0035056035672103246   0.3769300808600214       0.06614204896945376      0.6722765934358553
1.0010517144669322        -0.0035233755021678173   0.38340422214019315      0.05373761989050611      0.8830129284271141
1.0006164686556578        -0.003473731891760118    0.3850785645423114       0.040442516094971015     1.081338616317767
0.9989615344928251        -0.0032443495434328726   0.37099319184098767      -0.00793982648452239     1.9653267509588026
0.9993657904736639        -0.0034535151962759984   0.3835937342915812       8.228934108772992E-4     1.7393996128286522
1.0018479125432416        -0.0039499162002697924   0.393938604547422        0.06684310688960839      0.6964410499164995
1.0024263041529409        -0.003929030450817871    0.38751922139319955      0.07443601588152114      0.5711577244196558
1.0030312334088085        -0.003866002384395033    0.38060261826455305      0.07846263835425388      0.48385741453859304
0.9968489561930841        -0.002248658115904163    0.34346538624925044      0.01404710435672763      2.234856537244965
0.9972657141270339        -0.002638420698952638    0.34868198062726136      0.0013173607483055886    2.2158372271158187
0.9976947253557409        -0.0029822148768194495   0.35791176200527675      -0.00749994060242361     2.156633534637322
0.9854030319268413        -0.005939560595023593    0.5244965870126305       0.05808423785320053      1.311497911367246
0.9847189720819373        -0.006234429226030053    0.5312229882072316       0.05875114807717519      1.2971417703327288
0.9851273526643791        -0.0062101012750616965   0.5281623326590942       0.0572608957652617       1.3037293938336227
0.9845173688251001        -0.0066386716755914045   0.535022456293342        0.0567495193940722       1.29317209708521
0.984088489584579         -0.006653687176676442    0.5380244508869142       0.05831924985778494      1.287030330363068
0.9834986136049867        -0.006341144222517557    0.54029983435248         0.06262233430551468      1.2810103576192298
0.983720198700748         -0.006639068844445761    0.5404125471624948       0.05980340671334662      1.2812384885174772
0.9828422660647125        -0.0060383742850129915   0.5432546806959769       0.06693595518451127      1.2736026313828728
0.9831340176385845        -0.00636595396592902     0.5428946366086395       0.0637286696462033       1.2752127384364118
0.9824703299665252        -0.006249917192469652    0.5467829802281502       0.0667027309334742       1.267522009572902
0.9820977845095974        -0.006137085853568249    0.548751677786954        0.06861051427469321      1.2633668028483236
0.9817307397725812        -0.00461557817582072     0.5451345455094533       0.08018245826608571      1.2568865156659716
0.9816772810623795        -0.005034020213573207    0.5470444520951346       0.07738390548388845      1.2571716414588254
0.9814329260247976        -0.00434961892736858     0.5463321836920882       0.08283557344174132      1.2504471410970448
0.981658042644045         -0.005483639683265168    0.5489460316866827       0.07431006736431063      1.2584368429663273
0.9816767674946068        -0.005965122155434265    0.550815386244173        0.07098594931547002      1.2594616811744714
0.9579756194563167        0.01154217378858361      0.6634495648717457       -0.08997498136339209     1.123401535448698
0.9615672401296786        0.016749889797172526     0.6645695467922828       -0.07136989934259717     1.1299527749167686
0.9619207693439671        0.018539476220401207     0.6680881714268965       -0.06650756007116755     1.1278316732533282
0.9574382014518287        0.014026375443080413     0.669316852077099        -0.08394692184884167     1.1211106957811923
0.9594635883042465        0.015539988773342032     0.6671222734804632       -0.07746824464286502     1.125701202624656
0.9719415525994588        0.021537785641081764     0.6559947229776144       -0.04093355920255492     1.1444733360794188
0.9697778562535937        0.0209127670214806       0.6578859195207389       -0.046741395088332305    1.1424784922252618
0.9748254001831141        0.02382825796606796      0.6605460833101708       -0.031091378242522363    1.141068846725652
0.9726994065323328        0.023477191320605467     0.6622347568882158       -0.03603393161331492     1.1393370794092232
0.9760287647297322        0.025466726999787265     0.6659637821237457       -0.026687166529623756    1.1353829436067724
0.9633687107479144        0.020176025552754825     0.6691414459846996       -0.06038958130038329     1.128746325009755
0.9612769314985371        0.02004776864521163      0.6733537094274451       -0.0641259332623882      1.1249825634098507
0.9674241778963188        0.020414600356978355     0.661093681606827        -0.052461856911783525    1.1382323522634794
0.965446909513598         0.021030391291286234     0.6671792538854622       -0.05490612006297402     1.1319276120791475
5.819328186284868         1.222701075789582        1.026549887989849        -8.48508808183638E-4     0.9999367326642098
5.221918099390604         1.818964029010343        1.0098307449507804       -5.5330784616581444E-5   1.0001618028880823
5.7291355464453515        1.2783281092623902       1.0265278878757937       -7.303923071252565E-4    0.9999827353190539
5.2772570671744825        1.7283725728329304       1.0142134507726688       -1.2180993573307344E-4   1.000151538475263
5.6393791760109275        1.33410798401563         1.0261129219491802       -6.256393386828532E-4    1.000032113117946
5.331545376268871         1.637405977153335        1.0181027895289774       -2.0916522628685943E-4   1.0001414539924653
5.548215920687464         1.3903078748961637       1.025328583401928        -5.342172305712141E-4    1.0000764972227962
5.38382510254638          1.5463086436020526       1.021392538833269        -3.1726478918059397E-4   1.000134985072896
5.447677781910985         1.449223279830534        1.0241650389632602       -4.486993030017698E-4    1.0001073894855967
0.9785504081342078        0.025280069696790374     0.6627110334205238       -0.022003224398311257    1.1370834822015912
0.9816216208823785        0.023747489985938137     0.6529246841170605       -0.017433820240641315    1.1456224654695488
0.9834286920817535        0.022823471263465876     0.6469062794573603       -0.014768779041392814    1.1507031235076983
0.9854528488467055        0.02364416311546258      0.6505641030887309       -0.011248667415439693    1.1433805131193768
0.980995244977659         0.02550327800456598      0.6619714490738612       -0.017438548258613486    1.1363571000496506
0.977354315468788         0.027285397856926675     0.6724100598311469       -0.022569994231936365    1.1292105027071868
1.0062850010775597        0.008286774655225562     0.49304917765119977      -0.06963198927598975     0.8149963718328729
1.0074754726853057        0.006594457783260232     0.45806797784046255      -0.07136145137879567     0.7232329229947345
1.0069098562392353        0.007492672628712337     0.47645371973358214      -0.07165043404646254     0.7673963511545773
1.0066562040436824        0.00898994524375861      0.5047350201823237       -0.06841352330482965     0.8398881713806133
1.0087016708034866        0.006686363952036372     0.46158458428517973      -0.06825481240483518     0.7373994533529976
1.0042406288210204        0.010416988878529891     0.5353959499979825       -0.054261377444455375    0.9463351227740054
1.005466705264174         0.010217737168124415     0.5283588122043641       -0.06114502978296849     0.9045146764011617
1.0065073303521457        0.009811319662332554     0.5187746087729064       -0.06587682960179424     0.8697495751410159
0.9907958177352855        0.021616216871583757     0.6388165644205103       -0.006389801801104892    1.1414502250160867
0.9875494659422466        0.02443724301836429      0.6547161150885225       -0.008818446994191946    1.135106917279068
0.9892574163508441        0.023102172246360454     0.6474422062398407       -0.007435014160078601    1.1370822320636433
0.9938202315413772        0.02002811910210152      0.6297418025105578       -0.006447156604361498    1.1352811800672955
0.9944779429101307        0.018796336490561935     0.6213480117353339       -0.006389716952745916    1.1420465262591923
0.9956434881672379        0.018155499384450328     0.6173716383877434       -0.007669017119970387    1.1341988758308224
0.9967919418511175        0.017245231716476603     0.6110720103749521       -0.009573627124131652    1.1302980906662343
0.9978264568258233        0.016290194467451228     0.603932772753069        -0.012067902530325818    1.1250361278407388
0.9988437617524915        0.015469027719994548     0.5973510263129058       -0.015551810479939506    1.1137464098441463
1.0000347893626194        0.014682501285289041     0.590453413516654        -0.02102768573128541     1.0927119517188932
0.9997801602980043        0.015988681863238666     0.6018658362930154       -0.019701652017899394    1.0915043522161672
0.9931098819097256        0.02202301312224939      0.6423823267861765       -0.006963092591842434    1.1268174815786445
1.0020889064854825        0.013339479436206477     0.5758813648335314       -0.03372361422565778     1.0434724877173613
1.0014892603883192        0.01462748609605409      0.5891543760278127       -0.02880754151948316     1.060452633398494
1.0038508961365065        0.011778191968991871     0.5547117051572689       -0.047824702500403125    0.9802594868558806
1.003394803337076         0.013121206211980424     0.5712954646558542       -0.041942892910363176    1.0081030850345358
1.0092434688195744        0.005835350164159262     0.4479990672997141       -0.06386552971284774     0.7080435884089805
1.0078680490678795        0.001392252396416358     0.3634686561103741       -0.025838920636046415    0.4553458200944193
1.0081910918906358        0.002181721347852163     0.3777566296846607       -0.036898081916214055    0.5168871139959478
1.0087882023348989        0.002971428961950133     0.39659365080175646      -0.04424594843128965     0.5685357673144599
1.009133534039926         0.0035918428146291953    0.4096251015031763       -0.049213089839176605    0.6140146572821791
1.009481306736841         0.004886225814439772     0.43312919508673836      -0.05795589154291247     0.6744205521313791
1.0097407600919646        0.003973856659696258     0.4208169990473662       -0.05001242290293051     0.653211320792881
1.0083221285873907        7.123252831742336E-4     0.3662368471792921       -0.012992165710120882    0.4783312484820748
1.008353913131107         -3.362586729533411E-5    0.36501290912130635      1.585098057313134E-4     0.4657353234238424
1.0079905806631853        -6.074342511504433E-4    0.35967226371128996      0.010580462776819408     0.4507150236256469
1.0037130994438717        -0.003765481799118437    0.37433204840525774      0.07894636942787427      0.4280999051095548
1.0043344206827045        -0.003399463085436582    0.36092943513119763      0.07542577362843784      0.36349076087910936
1.0048907383039187        -0.003066055931692449    0.35280126977908144      0.06905309406447853      0.33573735599587534
1.0054328407862463        -0.002674963359616995    0.34665945904945267      0.06016105268615146      0.32581644220678346
1.0059466540337776        -0.002221117699868784    0.3426400250624639       0.04925398258031583      0.3258285530340599
1.0063716427802034        -0.0016812759996368528   0.3394462129833065       0.03683732188437266      0.3228508583496366
1.0074606876827195        -0.001193776349253115    0.35376185817509836      0.02256615143900498      0.4115787506752064
1.006998794903746         -0.0016523504521781852   0.3506001639608696       0.032870931933847804     0.38443457779709206
0.9906033514093622        -0.0034089030145638354   0.4597191678469274       0.05440106155458991      1.4922395444337215
0.9898854991396857        -0.003416857362067792    0.4679954592599747       0.05808267507329951      1.4684809495281819
0.9895647785667951        -0.003985365849882034    0.47528271960271967      0.053728713726019        1.4464451002677594
0.9886104371302827        -0.0044109810774202165   0.48746813884813317      0.054970255768035214     1.4037526226115855
0.9870085216723864        -0.0054078094273147595   0.5085361452548885       0.05490070899140096      1.3460315816675565
0.9866353423119175        -0.005649553339085736    0.5131955657854173       0.05477063431310807      1.3345326972856235
0.986265957549698         -0.005847160889006082    0.5174000471794012       0.05496818682464356      1.3273246010215525
0.9858599895468025        -0.005970740013711012    0.5212934007752801       0.05585888408811766      1.317081599906495
0.9865624457339714        -0.006015919536467537    0.5163011755463471       0.05228698721068179      1.330803944690779
0.9882560439795679        -0.004846387438830525    0.49385910437620323      0.05305357081805993      1.3848549914815178
0.98787273984866          -0.005245651196868899    0.5001734860505936       0.05173473997800208      1.3683076544452872
0.9874598279497063        -0.0056100004214571135   0.5063276849302047       0.05094469952629421      1.3531093544991792
0.9892109624046347        -0.004510307730211743    0.48266741856304846      0.05062688421926398      1.4226252345526211
0.9962415467580196        -0.002443401415810577    0.36016583943805824      0.018325910490537486     2.0693304641855956
0.9981318286310786        -0.003282752958878457    0.369832004081813        -0.01132821364495429     2.053913677615173
0.9985728451584673        -0.0035398888147276136   0.3825558864344678       -0.00990066308800392     1.9133131938867363
0.9997540520853305        -0.0036485275000293894   0.39388051457379847      0.011952919116704585     1.51524413447311
1.0002562439997944        -0.003738143457013457    0.39787575374899625      0.027382132967852434     1.2696215212129032
1.001274571409968         -0.003964466818545579    0.4002546078845987       0.0551939136771268       0.864115474587075
1.0007451890004768        -0.003922548421012046    0.40288283252242624      0.04151643893195294      1.0611156811077074
0.999014191900619         -0.0037561003567551324   0.39434585002789846      -0.003856091136879992    1.7453687371161506
0.9994523853186675        -0.003945600782035465    0.4043253516337168       0.005531129272358138     1.5634037491689643
1.001521347138261         -0.004482868044846757    0.4176948322769965       0.055905629178806156     0.8696862260111908
1.0021461443008277        -0.004490550092326822    0.41260268498432157      0.06625656609535152      0.7387590966150377
1.002778247576517         -0.004434200337990845    0.4053367407107085       0.07347133690388642      0.6334874213417705
1.0033975200318366        -0.004341648939301341    0.39810228533415204      0.07712263426766784      0.5640326428012776
1.0039117335502385        -0.004342635183584677    0.3964064478840999       0.07766877396691485      0.5300815378398434
0.9967009140714671        -0.002872020899187595    0.3645876122090737       0.00538861176655829      2.0584114476838917
0.9971738746283929        -0.003250472133511595    0.3724486907661457       -0.004271807328844016    2.0207342796759913
0.9976556585657765        -0.003580879738162452    0.38287723847206806      -0.009664428667345947    1.9495652854505894
0.9855721944490016        -0.006435969998153976    0.5264146159753823       0.05374469204350784      1.3104042562998843
0.985035265020612         -0.006620793749190701    0.5313550279522782       0.05475073774265498      1.300677435277259
0.9843000670264822        -0.006977770026026103    0.5385361190510969       0.055341615977936666     1.2869561704000196
0.9847385958160131        -0.0070444019768783174   0.536069647174637        0.0531274855530987       1.292320883684585
0.9838263047909541        -0.007098950683302581    0.5423506326095957       0.05638208575152847      1.2792705371006041
0.9832985453565319        -0.006811683500102755    0.5441541450219551       0.06019841649950587      1.2757830215298582
0.9827576298876107        -0.006621930175034858    0.5466990630064387       0.06330758265862012      1.2695702087818994
0.9822307890174553        -0.006604032605419086    0.5500459606864981       0.06512843284572052      1.2641060072444092
0.9817431150731463        -0.0064780131924512705   0.5526200903535566       0.0674204385818289       1.2599122825445044
0.9813396171842238        -0.004779241279450669    0.5484679970674272       0.08006003702611314      1.250518602627747
0.9812779379417652        -0.005242705135177624    0.5506286424688414       0.07697175035398153      1.2533024278046574
0.9810106236445763        -0.0044850994629856995   0.5497429598928644       0.08294828416638482      1.2411841868299633
0.981251814038698         -0.005740938798040132    0.5527482436903962       0.07362359885984203      1.2555724339027143
0.9812670157220458        -0.0062744621754964045   0.5548186175084134       0.07006089492147398      1.2560465711622377
0.9555071610753559        0.012324017732891664     0.6714271332340851       -0.09051675667282712     1.1152591111347918
0.9549332907362955        0.015040167483872807     0.6774994792099851       -0.08410228921588636     1.1150634320930541
0.9597345079462916        0.018359165303144392     0.6727356682768474       -0.0702352538509564      1.1235641645574057
0.9572263061479852        0.016800362175165413     0.6752657516174331       -0.07727223184784894     1.1189532628294643
0.9704075166033657        0.023071326818704115     0.664468536289097        -0.041400769392829946    1.1361100270039726
0.9685153446452137        0.022427264700250353     0.6655895533223477       -0.046340678247566894    1.1358324728836804
0.9737406228111952        0.02530809737289549      0.6679684799230552       -0.03135777795650715     1.1337847349098398
0.9712746157916885        0.025060975499771994     0.6703450437116946       -0.03656220995376038     1.1322157519010771
0.9748129344649836        0.02724639293240374      0.6744353455455526       -0.02718474664768845     1.1277692700834407
0.9595300429569193        0.02107597851763694      0.6796145628554345       -0.06458432385080472     1.1193989411141125
0.9618404239670043        0.0220794569914716       0.6774741420110063       -0.058985679998710745    1.1227897085532266
0.9642147610338044        0.022669811964381056     0.6744681194126604       -0.05383137094512474     1.1256773478991116
0.9665474600659847        0.022819660276767743     0.6705388985996344       -0.04931516545304993     1.1290604199858836
5.110982696154402         1.819114868606805        1.009891097831902        -5.586823956785848E-5    1.000193330215286
5.819222674079051         1.1113884765634807       1.0256597661845122       -0.0010888003771196975   0.9999268358661327
5.72894511064138          1.1671770718800307       1.0265139414056035       -9.484279681685211E-4    0.9999776047174027
5.16632249559666          1.7286311804848362       1.0142984260596555       -1.237793021701575E-4    1.000184256848305
5.638779030989125         1.2232115096227465       1.0268894487371865       -8.24383709832591E-4     1.000038940077083
5.221500548960157         1.6381313193207492       1.0181937988482481       -2.1279253297392414E-4   1.0001747383769766
5.548230886185522         1.279260812152611        1.0268445613860608       -7.179454015889974E-4    1.000078035228446
5.276950084046495         1.5478686935726986       1.021480837025358        -3.1885795342420387E-4   1.0001646303974097
5.457154994060591         1.3336135739421007       1.0264190349373428       -6.068341923054198E-4    1.0001161696020848
5.333672630087859         1.4565938161435605       1.0241207334760583       -4.4790215891345577E-4   1.0001489528431569
5.374737299187042         1.3762905771561693       1.025807348292906        -5.633875352595482E-4    1.0001389823245455
5.819255984641271         1.000159347620536        1.0228444997595674       -0.001372202209113527    0.9999215067493755
0.9798878613266719        0.02730849694147258      0.6708446188065381       -0.018260965607025694    1.1285200008651997
0.983493241748997         0.02518839134482332      0.6592739710313236       -0.013547395357542735    1.136854342718667
0.9859280046935454        0.025728975853131324     0.6615438783419032       -0.010375373616412649    1.1312326220445366
0.9823819454796109        0.027347209884894367     0.6699907057628894       -0.014456669793916558    1.1278648751490568
0.9876723794514735        0.026237170992979467     0.6642402280519767       -0.008976094361793316    1.1241902449107362
0.9761161984227579        0.029221100199445085     0.6810962137498792       -0.023286190344353006    1.1220115200646255
0.9787297257343757        0.029189600371661028     0.6794181052386105       -0.01911389620718792     1.1217336866954548
1.0073248091604974        0.008385873188309355     0.49268837729098797      -0.07034191393149157     0.8043237239544938
1.0080469814166162        0.0075676925364349555    0.4772094739124048       -0.07060442368824761     0.7679546469342048
1.0074564345783532        0.009315202369595595     0.5084079075535931       -0.06880912142584204     0.8351661777754676
1.0098565194393152        0.006627540914746497     0.46358441792981836      -0.06461095328605206     0.7435047300106331
1.0092805293538596        0.007587089954611516     0.4782777408041348       -0.06824752487192011     0.7731162894377169
1.0051343773530688        0.011400000612471338     0.5461273521319344       -0.05586844691250282     0.939287884283376
1.0063347853759392        0.01092331155466085      0.5359731458670068       -0.06212485557458419     0.9020018430448733
1.0073974186347388        0.010333973850834562     0.5245094606167432       -0.06639249252546559     0.8695154043011871
0.9914484547683731        0.023790307480674466     0.6520830793667574       -0.007196762348754232    1.1248557372603252
0.9896942914814835        0.025603330713604128     0.6614393391465528       -0.007878184481962721    1.121384891833482
0.9949184403903963        0.02128693091999166      0.6386353030323232       -0.008399130871623568    1.1195917320532283
0.9956929088036589        0.019943867918404263     0.63026343535231         -0.008805669934313481    1.1215552161358486
0.9970952512034642        0.01883565014473743      0.6232248840295916       -0.011225681365580407    1.1148943267462066
0.9981596743921103        0.017794009910374785     0.6160076137031015       -0.013811255226078864    1.1082438830062997
0.9990590940318238        0.016807093419323498     0.6085689941954905       -0.01673251385654741     1.1011904795999816
1.00091079505661          0.01591293400595466      0.6009438907710979       -0.02496658431065916     1.0700870379724912
1.0003041094883145        0.017092361767586575     0.6107548955674762       -0.02177504653604143     1.0776021373638456
0.9951709738331274        0.023067821435499545     0.6495854102963198       -0.009546790483995761    1.105614265163758
0.9935928011439723        0.024340829071971614     0.65608926889671         -0.008395319485519935    1.1118880444958499
1.0028707379545996        0.014495269092046422     0.5862241569928516       -0.0365197821707347      1.0288532029299189
1.002260305122603         0.01587689265376556      0.5995467332153348       -0.03156847597209749     1.044944493798586
1.0047646514807713        0.012782435800702022     0.5642616472022342       -0.050165031025116595    0.9722690929544795
1.0042903030738284        0.01425461707937653      0.5812393301384154       -0.044339388140814735    0.9973753898575192
1.0103176584005118        0.005606191106015212     0.4493522866370769       -0.05876558124094428     0.7140085918238737
1.0111354841200855        0.006478128628531116     0.465966721696957        -0.05991443497045081     0.7551954876188717
1.0087888369214397        0.001521628221296124     0.3793766897550222       -0.024904191816794537    0.5312835015546485
1.0092370682394924        0.0023164683370373003    0.39359025115361085      -0.03436877697559335     0.5675371255176563
1.0096284437427863        0.003144134234764061     0.40825864765522163      -0.04257535623148343     0.6188104209566333
1.0106004869564982        0.0034888845843152653    0.4221704434572679       -0.04218506853640208     0.6668193993626182
1.010610402437922         0.004524936948609505     0.4355356499887066       -0.05081794607787161     0.6893069548437526
1.0089001295527171        2.0009912714041424E-4    0.3744270105400704       -0.003652898373474549    0.5163512950033756
1.0092764607097116        8.719818277010294E-4     0.3824549346454141       -0.013936364354722744    0.5436048044504992
1.0088697173955177        -5.888877498116125E-4    0.3745820151671602       0.009127997246795616     0.5121875235308716
1.008241723631667         -0.0013260409642600849   0.3685153656020988       0.02248814012348482      0.4813766246813302
1.0043226702031323        -0.0040631990515690225   0.3859017603292407       0.07712004297865992      0.47845548039690694
1.0049525153101027        -0.003747986686745893    0.376555644187262        0.0734930340187867       0.4394189128215448
1.0055658404271064        -0.0033790448633414546   0.3690468050808567       0.06701325684585262      0.41903455469532197
1.006184388398781         -0.0029334578001253488   0.36333561637735784      0.05792002799718888      0.4085468941516646
1.0068272881607072        -0.0023506167924080097   0.35939453171074653      0.04554642809266802      0.41743108187210476
1.0075719173886362        -0.0019209900319580773   0.3640866361339889       0.03468687076169621      0.45782157969259335
0.9955722795015695        -0.0026581690730542473   0.37634563375474445      0.02390711818171629      1.9067819480720758
0.9948333013514882        -0.002889052986788472    0.3935613116327936       0.029623611653903443     1.7710106980005704
0.9913934920436563        -0.003393319894341725    0.45002167793961023      0.05003521932406626      1.5231696648253923
0.9922365347113042        -0.003353417679309415    0.43882124560006114      0.045120866762008514     1.5640253676515392
0.9940145844296803        -0.0031220550527394433   0.4106340624775436       0.03435861728810718      1.6825784781425972
0.9931277850581527        -0.0032820231962914013   0.4257995643471228       0.0395249067256705       1.6130654355997611
0.9910189272208125        -0.0040751052617496175   0.46071142161863904      0.04438135478839241      1.4914984983243473
0.9902593029895478        -0.004037241891488517    0.4685172172849386       0.04933223136860849      1.466824937134007
0.9898755952919216        -0.004618991935413473    0.4773417804652124       0.0457619907931447       1.4409733957467645
0.9888253743144473        -0.004987433859156327    0.4899757667062175       0.04856458180100015      1.3999577758522168
0.9869931673350762        -0.005951170001082917    0.512535988982802        0.05066057059240337      1.3409655735748427
0.9862269169648872        -0.006325383338578858    0.5209625505863458       0.051573656999771664     1.3197111756364308
0.9866896816192092        -0.00630705178903797     0.5174643228123073       0.049502890508767536     1.3299355487746702
0.9859993770323853        -0.006888478143198546    0.5265668685159673       0.048673479115162094     1.3120329981384062
0.9884111806928221        -0.005420466697008773    0.49707136540778735      0.04727468489255917      1.3801692073228304
0.9879726942129213        -0.005813584539017436    0.5038529609396402       0.04656705904282337      1.3630500826675591
0.98751729006687          -0.006171849616967804    0.510268210195708        0.046278317251506995     1.347924405914448
0.9894543730650597        -0.005146765079228892    0.48589961793732633      0.043491793624474744     1.415521587438615
0.9960785434642813        -0.0031325693449687675   0.38027097714610375      0.010008600370036506     1.9158407113353781
0.9981415950305225        -0.0038635494677172924   0.39445041336894615      -0.010354069299660658    1.8474919063904356
0.9986264498955713        -0.004098975238022342    0.40561452109142015      -0.0066173201219911154   1.7209699819205933
0.9999092059974936        -0.004130179115983503    0.4125304549996926       0.017284920076202668     1.3671377223831203
1.0004002224763908        -0.00429059828539275     0.41774270671005914      0.030268092059804328     1.1917778310848064
1.0009360420816416        -0.00440875124352393     0.4194161544959884       0.04350509930188027      1.0191170818366642
0.9991032004791944        -0.004295841168660064    0.4153294745644322       6.248777231417646E-4     1.5807017287678382
0.9995656967963179        -0.004469554025046992    0.42320313199342025      0.010042416611087247     1.4362084544826546
1.0011306594498923        -0.004961166992940092    0.4360534578914444       0.04466683865976372      0.9976953806392875
1.0017925622364279        -0.005122781670681973    0.43672468347380644      0.05588318354319643      0.8761706495763378
1.0025093436820138        -0.005027115516773111    0.42822729822366284      0.06647569830591558      0.7570787175074506
1.0031582994947226        -0.004952450490905643    0.4212617911997077       0.0726101248285566       0.6758461898016227
1.003772121702572         -0.004840291969510224    0.41427141306629117      0.0759089371887494       0.6146187124572905
1.0043607736875024        -0.004709590862556417    0.40820916972959603      0.07674777077776195      0.5801539174406392
0.9966000480980002        -0.0035496034470504276   0.38713771117339896      -5.730827996811755E-4    1.8973117970623339
0.9971301902730937        -0.003913955095971197    0.3963983801288405       -0.007265098296831414    1.8495156162660036
0.9976648766635199        -0.00422575907597955     0.40694914173968083      -0.009682285706856935    1.7752671226903425
0.9853531361696826        -0.007096989357917067    0.5323602612923414       0.050179812010378015     1.3022474244040902
0.9858470005516102        -0.0074071134436763      0.5313737985745374       0.0459538480969997       1.3055894789367006
0.9837793948492599        -0.007591515777281821    0.5455944290652674       0.053465653679202085     1.277098670961718
0.9843260127757745        -0.007455904443329553    0.5413510938635219       0.05215335085871815      1.2836807060193356
0.9848995610987045        -0.007476534926085713    0.537891722993148        0.04967403807478513      1.2916827592244788
0.9832956701425908        -0.007413306200484365    0.5475286047368598       0.0563681752979456       1.271820816651848
0.9828944040132495        -0.007144353565275148    0.5485528427221076       0.0594820242906827       1.2700023988773523
0.9824140288738182        -0.007135077560379954    0.5515175458601754       0.06115008817379022      1.2633499880285897
0.9818600209784045        -0.007036671417543649    0.5544811880451047       0.06352710377860497      1.2594057225775135
0.9813263127167664        -0.006850704947245966    0.5569339577407989       0.06624583280811493      1.2555306140997005
0.980905344455063         -0.004957859696559422    0.5521771689918378       0.07984502337566984      1.2469209913954353
0.9808330946213223        -0.0054676247355175895   0.5545392833533526       0.07645886294121666      1.2521725903162493
0.9805441228937373        -0.004631737085147148    0.5535999043864194       0.08290522238238916      1.2369803677427633
0.9807974815584507        -0.006013833032410826    0.5568162056768616       0.07291603606081039      1.252830203311288
0.9808106518486385        -0.006604044811663245    0.5590749278362231       0.06914590074837691      1.2521587693437375
0.952815187399225         0.013170447429551618     0.6797205234108826       -0.09048787167452653     1.1109163648077238
0.9522986270970101        0.01613761093697857      0.6855006445478837       -0.08399563647985524     1.1085501374105922
0.9546439538556536        0.018074908086214727     0.6836869671337052       -0.07735274101535489     1.112622015622012
0.9571566772427073        0.019760692993081017     0.6816293532545467       -0.07064095919828568     1.1161383911742757
0.9519109678142262        0.019113446386995057     0.6914256303352627       -0.07794947610032298     1.106074509468861
0.9684197124068046        0.024917969027320956     0.674179246653023        -0.04225293077525657     1.1285765928524725
0.9722749884589625        0.027043819812197813     0.6763579211337135       -0.03208042712770114     1.125822539931591
0.9699195729264432        0.02675267626377324      0.6782067111869807       -0.03682441365019173     1.1243797951832062
0.9733573821253798        0.029161913813550412     0.6830659579787692       -0.027997573171947367    1.120254720549917
0.9749236595305991        0.03130659547867679      0.6896777164419197       -0.02384063660321628     1.1146799364408186
0.9574663341421507        0.022652729628422987     0.6874285926261029       -0.06435887087100313     1.1134367062451582
0.9600022436715073        0.02376266782933592      0.6853109876123255       -0.05863572991256085     1.1160108571163523
0.9626498224383624        0.02474429712129298      0.6831755357104958       -0.05272993016053757     1.1196147072324891
0.9654352293648921        0.02516901577917856      0.6797234258018708       -0.0472525722213108      1.1220876738660321
4.999956693232494         1.8191765792065906       1.009957463972679        -5.679683554151942E-5    1.000224385882161
5.055404597850891         1.7287746524902914       1.0143909981350279       -1.2596612182641441E-4   1.000216477642707
5.728931861858203         1.055913779967605        1.0247447338471931       -0.0012131167579199258   0.9999769038740131
5.638813773834669         1.112105121851433        1.0260920033020928       -0.0010651330380768151   1.0000312432559035
5.110806054285297         1.6384182192382981       1.018304065917482        -2.1599826952849435E-4   1.000208198014694
5.5487479760278475        1.168755648099688        1.026913233949447        -9.245377501246668E-4    1.0000797215522652
5.165949174609996         1.5480923968854425       1.0216120596530376       -3.2083275187017013E-4   1.0001995814991564
5.457186900523453         1.2256340878259822       1.027239068470518        -8.10547755679204E-4     1.0001176529516478
5.221116578156075         1.4566432998758898       1.024274927210662        -4.394529530356678E-4    1.0001906693340006
5.357261750027898         1.2838530075822188       1.027150237555703        -7.054263722146588E-4    1.0001386954847833
5.276817100461872         1.3595853567455076       1.0262818375578384       -5.805229248993323E-4    1.0001911666437948
5.280025795061754         1.281636275758302        1.027289554482474        -7.133528521980856E-4    1.000204575414242
5.819240421931405         0.8889916069751083       1.0177668689899468       -0.0016963691164022486   0.9999279650766341
5.728958975127622         0.9447318672332239       1.0208784292629502       -0.0015303341591380564   0.9999827184017304
5.819206952137379         0.7778415200621408       1.0101949308014737       -0.0020327021251931384   0.9999530974786265
0.9813134606497107        0.02924485774999701      0.6786586783904892       -0.015375862293472903    1.1200489685797244
0.984643026070122         0.02752467519029993      0.6704071487351201       -0.01162598290573652     1.1238485523100668
0.9866965197050959        0.02728502538340179      0.6693043419415301       -0.009759799890594405    1.120232233985308
0.9839226927779534        0.02930361370764299      0.6784972681733282       -0.012265260875189353    1.1163582274120059
0.9885987677235881        0.0277240887120755       0.6717287589885591       -0.008792600965100107    1.1142569235735718
0.9775189036419607        0.03113702785697528      0.6876386571397065       -0.01999895926846978     1.1153275743620694
0.976580042396811         0.032909611842293504     0.6945573737606483       -0.020571542608266043    1.1090396522793058
0.9801970120406476        0.031287440692556914     0.6872769299567701       -0.016286767032690552    1.1133391964528805
1.0085485373069434        0.008702726807187146     0.49678523019730075      -0.06968896047072032     0.8098664576401634
1.0082660619013406        0.009750279031020482     0.5138757200975321       -0.06841374536428846     0.842688040623378
1.0105643875710753        0.007530615115998845     0.4796584631275424       -0.06497300013273068     0.7781562928883864
1.0099915642859267        0.008574844417578128     0.4947692789056985       -0.06774652651107073     0.8036539017623429
1.0084901492602232        0.010739343219890854     0.5280526004901258       -0.06692184561990422     0.8702427935276938
1.0061488921636423        0.012282214552230386     0.5544976609213484       -0.05756987671326912     0.9338851523446933
1.0073936376038795        0.011544789857366313     0.5416620654586523       -0.06337792114056778     0.9018271851667777
0.9921537423057711        0.02602736740936203      0.6644754135675295       -0.008257009221768667    1.1107939433570924
0.9938594092154869        0.025874374663736266     0.6643389215800795       -0.00927898156727302     1.101286484138494
0.9911293635342142        0.027831103314460454     0.673000654245188        -0.008577697621266438    1.104798823775494
0.9965396151050488        0.02167797953053166      0.6418710273125091       -0.011235022673542252    1.1031884013309998
0.9976302274522999        0.020499463176640455     0.6347932305588282       -0.013189058251135284    1.0997127412632768
0.9986532665543617        0.019375828762078155     0.627529590785073        -0.015748981779244883    1.0932051749801472
0.9995380925289199        0.018205154181513517     0.6192896119134618       -0.01861581449780358     1.0865372818509587
1.0016324872353983        0.017182187033713728     0.6108035678648925       -0.02747940529483221     1.056328757703384
1.0009247984701004        0.018439297793568926     0.6206718164404065       -0.023820705507702045    1.0661693333728526
0.9971989125850773        0.023638900450848672     0.6535347131836048       -0.013121103015215402    1.0897148431818933
0.9956661918645433        0.025439275517404276     0.6628003066920695       -0.011119975799974204    1.0926561943672723
1.0037293819544622        0.01573173131492363      0.5962645840883064       -0.038872031043197856    1.0175015178127538
1.0030750620559197        0.017178155086197782     0.6093685576593831       -0.03384302394230118     1.0336529454765542
1.0058083289927566        0.013859902736560669     0.5736035086623475       -0.05214038236701144     0.963808267502693
1.0052863752125962        0.01548489744342816      0.5911017294529374       -0.046279744277422534    0.9891341458937412
1.0119288822790988        0.007489623863083598     0.4827892069400597       -0.061242798521683885    0.7867264328736615
1.0115621308926162        0.005268020221399611     0.45171701896204935      -0.052316302611449865    0.7342857077892572
1.0126745570407718        0.006321888679612502     0.47082835086289443      -0.054445883871729       0.7683545999601318
1.0098416500310778        0.0016190630433285322    0.3950278136991136       -0.02337033637208268     0.5866424595807831
1.0102705935602878        0.0025223126539756337    0.4082037834384123       -0.03333887780706334     0.6164996651976424
1.0111787895943423        0.002825913493932848     0.4209082248828667       -0.033684163513072414    0.6642798564014013
1.011726608117073         0.003838556887070761     0.4360017654287289       -0.04144242311006252     0.705065789581357
1.009663672862198         7.869142955301428E-6     0.3861851406682657       -6.682791844990328E-4    0.5659033899141863
1.0103609402123677        7.424530300353399E-4     0.39739671624704603      -0.010659886967862976    0.5967195208284712
1.0098177721751043        -8.617842961153638E-4    0.3899624066652337       0.011908747619767715     0.5730339025956296
1.0091202743130547        -0.0015019103391043693   0.3834985966268687       0.02266987300813789      0.5469895216870787
1.0084214700827183        -0.00213024583225565     0.3796392352560664       0.03416613692249315      0.5211047222564785
1.004963610089552         -0.004461724604578851    0.4000565605091931       0.07552369606932609      0.5397152902037176
1.0056308990810234        -0.004130796151405911    0.391884508468278        0.07164479058574887      0.5089844455066244
1.006307247246018         -0.0037236573019142826   0.38491730234482474      0.06509514301746656      0.49218427926869684
1.00699624868347          -0.003232996563988743    0.3798064582139657       0.0560257019633189       0.49050127749853045
1.0077037754854719        -0.0026971955417608657   0.3780377060290623       0.04539011633547712      0.4975479018657974
0.9953904313376443        -0.003418421522085657    0.39627923911628193      0.014972056068699018     1.7987088722220717
0.9946220053435632        -0.0037228164557698332   0.412595840684363        0.01983393585987477      1.691507038506721
0.991846257645581         -0.0040991641454587585   0.4517875369036444       0.03869160795164179      1.521855964157741
0.992732748671852         -0.004087126621126258    0.4415415821049919       0.032378746289925514     1.5611610333339734
0.9937138980040965        -0.004087908741140217    0.4301648271264017       0.024166581898821458     1.6141744988575744
0.9914199932520492        -0.004817972895244886    0.4646061611226769       0.03412571467949448      1.4831765657950884
0.9906123812298514        -0.00472895585668013     0.4713678587291133       0.040244895169167155     1.460873913231442
0.9901561542510419        -0.005325338275619953    0.481607105912592        0.03770386075453291      1.4317943799603086
0.9890016526632136        -0.00561880472893943     0.493997193919783        0.042244545089201356     1.3921452302140702
0.9870763156923852        -0.006499364357516456    0.5161125832500808       0.04616503954624334      1.3357769168612583
0.9865895623697258        -0.006743421711544076    0.5214346191149316       0.04687296649005901      1.3226777380859398
0.9864069299952725        -0.007322267848025513    0.5271337969206132       0.043880977546878024     1.3156495328946838
0.9885259318070286        -0.006039824132001274    0.5015368696582225       0.04172027097269781      1.3725039676679927
0.9880383733925596        -0.006414140496768886    0.5084780190715349       0.041683280527034565     1.3554419233506918
0.9875574561959753        -0.00675244092252926     0.5148128902920696       0.04188485567270301      1.3399229354195927
0.9896553238405782        -0.005846776542348179    0.4910477363577605       0.03654237747520278      1.403758682023519
0.9959680800771443        -0.003880573822179021    0.4020977923433117       0.0034828726607123504    1.7921735433749273
0.9981989257589468        -0.004481934242522567    0.4173604614298037       -0.007921682191091078    1.6786416664752422
0.9987251255735544        -0.004686490260114211    0.42658780900477405      -0.002585196192156369    1.5693865547791788
1.0000255195882033        -0.004692884108184756    0.4311026572304213       0.020601014700883144     1.275868413231537
1.000543961051083         -0.004841528390747308    0.43495461053759693      0.032305024951899235     1.137677085979882
0.9992323420264552        -0.004838544569577287    0.4336415310012813       0.005207204206650534     1.4554372685141834
0.9996702371385967        -0.004923062634334741    0.437466063397432        0.013408461843580605     1.3476660992943452
1.0007020596862508        -0.00543779745937906     0.451272717341967        0.03397393863851137      1.1084526445047247
1.001245294241265         -0.005549862073058928    0.45212962072989454      0.043768820964104845     1.011365797579021
1.0017329239978725        -0.0057312660954318955   0.45430010995533915      0.05099122870961339      0.9298473260433141
1.00226218468335          -0.005616727829237732    0.44789831841458555      0.05918847901911278      0.8544622677111287
1.0029067225466293        -0.0055780114086359895   0.4424896775708768       0.06659744069389152      0.774266321650162
1.003584056300057         -0.00549726626146046     0.43603883838834584      0.07195085271866379      0.7091491919943683
1.0042601607684387        -0.005373507410589179    0.4292847699182967       0.0748985730017682       0.6598468494890025
1.0049361517994118        -0.005188393643894888    0.4222123698158065       0.07555257360178762      0.6231118787851143
0.9965515102049276        -0.004273600450800526    0.40998760071472534      -0.004304310597512014    1.758780386070952
0.9971376938748119        -0.004628434639358765    0.4199329121632058       -0.008174665316173604    1.702429189664305
0.9977266798402716        -0.004912750774079074    0.42969168719162626      -0.00810368133091665     1.6267953511769002
0.9860892761103693        -0.00792583157823192     0.5338394395616445       0.04163109899446177      1.3029056822008902
0.9853796684114705        -0.0078063406670998686   0.5372155295498114       0.045565611970124764     1.2941044964027666
0.9834122514088519        -0.00796468346305392     0.5500707995236761       0.05260633674238966      1.2711835642188525
0.9840367351281286        -0.008024734096238682    0.54675845646813         0.0498464122936133       1.2763930959520853
0.9847005611389555        -0.007979179511386022    0.5425246949583363       0.04742853432802707      1.2855535514004577
0.9827064378887975        -0.007736423679037613    0.5529406405437837       0.05649185186034432      1.2648064532183916
0.9820349498740122        -0.007666384577702129    0.5565555369366323       0.05915322199891376      1.2589812731509362
0.9814365732614269        -0.007477438085528389    0.5591666050318765       0.06212479110485588      1.2545533518654202
0.9808759049956862        -0.007234643728167922    0.5613707297474327       0.065156877424988        1.250857602442503
0.980425269021629         -0.005148112621156874    0.556211126681969        0.07942734384997098      1.2501352721572987
0.9803454336696569        -0.0057090423538554294   0.5586270141483981       0.07584966782340839      1.2507743132194475
0.9800303605569438        -0.004789398329569242    0.557808942723551        0.08237241837690769      1.251015692888769
0.9803122910531857        -0.00631080280562125     0.5610021255522085       0.07213476489681026      1.249763057326658
0.9803275406499039        -0.006952340512800291    0.5634123888604666       0.06824120921146824      1.2477998776907067
0.9499692956401912        0.01415416224162438      0.6875580430334174       -0.09016579153694726     1.1058423442696652
[truncated: 1,235,856 more chars]
