# Supplementary material
Source: ML conference proceedings conference paper supplement (https://proceedings.neurips.cc/paper_files/paper/2022/hash/7f970edb14104b81e70e3b03e1f5214f-Abstract.html)
Supplement: Supplementary file 1 [file 7f970edb14104b81e70e3b03e1f5214f-Supplemental-Conference.zip › code/requirements.txt]

certifi==2021.10.8
cycler==0.11.0
DeepXDE==1.1.1
fonttools==4.30.0
joblib==1.1.0
kiwisolver==1.3.2
matplotlib==3.5.1
numpy==1.22.3
packaging==21.3
Pillow==9.0.1
pyaml==21.10.1
pyparsing==3.0.7
python-dateutil==2.8.2
PyYAML==6.0
scikit-learn==1.0.2
scikit-optimize==0.9.0
scipy==1.8.0
six==1.16.0
threadpoolctl==3.1.0
torch==1.10.2
typing_extensions==4.1.1
