# Supplementary material
Source: ML conference proceedings conference paper supplement (https://proceedings.neurips.cc/paper_files/paper/2022/hash/7f970edb14104b81e70e3b03e1f5214f-Abstract.html)
Supplement: Supplementary file 1 [file 7f970edb14104b81e70e3b03e1f5214f-Supplemental-Conference.zip › code/src/configs/case2/params.py]

from src.utils.utils import load_airfoil_points

# path
data_path = "data/case2_airfoil.txt"
airfoil_path = "data/w1015.dat"
model_path_prefix = "model/case2_"

# parameters for PDEs
xmin = [-2, -2]
xmax = [6, 2]
Re = 50.
nu = 1 / Re # viscosity

# the anchor points of the airfoil
anchor_points = load_airfoil_points(airfoil_path)
