# Supplementary material
Source: ML conference proceedings conference paper supplement (https://proceedings.neurips.cc/paper_files/paper/2022/hash/7f970edb14104b81e70e3b03e1f5214f-Abstract.html)
Supplement: Supplementary file 1 [file 7f970edb14104b81e70e3b03e1f5214f-Supplemental-Conference.zip › code/src/configs/case2/pfnn.py]

import torch
from src.PFNN.pfnn import PFNN
from src.configs.case2.hc import l_gamma_openrec, l_gamma_right

class PFNN_NS(PFNN):
    """
    Penalty-Free Neural Network for NS equation.
    """

    def forward(self, x) -> torch.Tensor:
        raw_output = self.net(x)
        u_hat = raw_output[:, 0] * l_gamma_openrec.get_dist(x) + 1.
        v_hat = raw_output[:, 1] * l_gamma_openrec.get_dist(x) + 0.
        p_hat = raw_output[:, 2] * l_gamma_right.get_dist(x) + 1.
        return torch.cat([u_hat, v_hat, p_hat], dim=1)
